# Supplementary material for: Classification of Environmental Strains from Order to Genus Levels Using Lipid and Protein MALDI-ToF Fingerprintings and Chemotaxonomic Network Analysis
Source: MDPI journal article supplement (doi:10.3390/microorganisms10040831), 2022-04-17
Supplement: s1 [file s1]

# Classification of environmental strains from order to genus levels using lipid and protein MALDI-ToF fingerprintings and chemotaxonomic network analysis

Marceau Levasseur<sup>1</sup>, Téo Hebra<sup>1</sup>, Nicolas Elie<sup>1</sup>, Vincent Guérineau<sup>1</sup>, David Touboul<sup>1,2\*</sup> and Véronique Eparvier<sup>1\*</sup>

<sup>1</sup> Université Paris-Saclay, CNRS, Institut de Chimie des Substances Naturelles (ICSN), UPR 2301, Avenue de la Terrasse, 91 198 Gif-sur-Yvette, France; [marceau.levasseur@cnrs.fr](mailto:marceau.levasseur@cnrs.fr) (M.L.); [teo.hebra@cnrs.fr](mailto:teo.hebra@cnrs.fr) (T.H.); [nicolas.elie@cnrs.fr](mailto:nicolas.elie@cnrs.fr) (N.E.); [vincent.guerineau@cnrs.fr](mailto:vincent.guerineau@cnrs.fr) (V.G.); [david.touboul@cnrs.fr](mailto:david.touboul@cnrs.fr) (D.T.); [veronique.eparvier@cnrs.fr](mailto:veronique.eparvier@cnrs.fr) (V.E.)

<sup>2</sup> Université Paris-Saclay, CNRS, Laboratoire de Chimie Moléculaire (LCM), École Polytechnique, 91 128 Palaiseau, France; [david.touboul@cnrs.fr](mailto:david.touboul@cnrs.fr) (D.T.)

\* Correspondence: [david.touboul@cnrs.fr](mailto:david.touboul@cnrs.fr) (D.T.); [veronique.eparvier@cnrs.fr](mailto:veronique.eparvier@cnrs.fr) (V.E.); Tel.: +33-169-823-032 (D.T.); Tel.: +33-169-823-679 (V.E.)

## TABLE OF CONTENTS

|                                                                                          |            |
|------------------------------------------------------------------------------------------|------------|
| <b>Table S1. Summary table of studied bacterial strains (RKI) .....</b>                  | <b>2</b>   |
| <b>Table S2. Summary table of studied bacterial strains (BSNB).....</b>                  | <b>21</b>  |
| <b>Table S3. Summary table of studied fungal strains (BSNB).....</b>                     | <b>26</b>  |
| <b>Table S4. 16S of studied bacterial strains (BSNB) .....</b>                           | <b>34</b>  |
| <b>Table S5. ITS of studied fungal strains (BSNB) .....</b>                              | <b>75</b>  |
| <b>Figure S1. R script used: generation of a .mgf and .csv files .....</b>               | <b>129</b> |
| <b>Table S6. Parameters used for constructing chemotaxonomic networks on MetGem.....</b> | <b>131</b> |

TABLE S1. SUMMARY TABLE OF STUDIED BACTERIAL STRAINS (RKI)

| <b>Names</b>                                                     | <b>Order</b>    | <b>Genus</b>         |
|------------------------------------------------------------------|-----------------|----------------------|
| <i>Achromobacter_xylosoxidans_HST_107_01</i>                     | Burkholderiales | <i>Achromobacter</i> |
| <i>Achromobacter_xylosoxidans_HST_107_02</i>                     | Burkholderiales | <i>Achromobacter</i> |
| <i>Achromobacter_xylosoxidans_HST_115_01</i>                     | Burkholderiales | <i>Achromobacter</i> |
| <i>Achromobacter_xylosoxidans_HST_115_02</i>                     | Burkholderiales | <i>Achromobacter</i> |
| <i>Acinetobacter_baumannii_DSM_24110_01</i>                      | Pseudomonadales | <i>Acinetobacter</i> |
| <i>Acinetobacter_baumannii_DSM_24110_02</i>                      | Pseudomonadales | <i>Acinetobacter</i> |
| <i>Acinetobacter_baumannii_DSM_24110_03</i>                      | Pseudomonadales | <i>Acinetobacter</i> |
| <i>Acinetobacter_baumannii_DSM_24110_04</i>                      | Pseudomonadales | <i>Acinetobacter</i> |
| <i>Aeromonas_hydrophila_subsp_hydrophila_DSM_30187_01</i>        | Aeromonadales   | <i>Aeromonas</i>     |
| <i>Aeromonas_hydrophila_subsp_hydrophila_DSM_30187_02</i>        | Aeromonadales   | <i>Aeromonas</i>     |
| <i>Aeromonas_hydrophila_subsp_hydrophila_DSM_30187_03</i>        | Aeromonadales   | <i>Aeromonas</i>     |
| <i>Aeromonas_hydrophila_subsp_hydrophila_DSM_30187_04</i>        | Aeromonadales   | <i>Aeromonas</i>     |
| <i>Bacillus_alveayuensis_DSM_19092_01</i>                        | Bacillales      | <i>Bacillus</i>      |
| <i>Bacillus_alveayuensis_DSM_19092_02</i>                        | Bacillales      | <i>Bacillus</i>      |
| <i>Bacillus_alveayuensis_DSM_19092_03</i>                        | Bacillales      | <i>Bacillus</i>      |
| <i>Bacillus_alveayuensis_DSM_19092_04</i>                        | Bacillales      | <i>Bacillus</i>      |
| <i>Bacillus_aminovorans_DSM_4337_01</i>                          | Bacillales      | <i>Bacillus</i>      |
| <i>Bacillus_aminovorans_DSM_4337_02</i>                          | Bacillales      | <i>Bacillus</i>      |
| <i>Bacillus_aminovorans_DSM_4337_03</i>                          | Bacillales      | <i>Bacillus</i>      |
| <i>Bacillus_aminovorans_DSM_4337_04</i>                          | Bacillales      | <i>Bacillus</i>      |
| <i>Bacillus_amyloliquefaciens_ssp_amyloliquefaciens_DSM_7_01</i> | Bacillales      | <i>Bacillus</i>      |
| <i>Bacillus_amyloliquefaciens_ssp_amyloliquefaciens_DSM_7_02</i> | Bacillales      | <i>Bacillus</i>      |
| <i>Bacillus_amyloliquefaciens_ssp_amyloliquefaciens_DSM_7_03</i> | Bacillales      | <i>Bacillus</i>      |
| <i>Bacillus_amyloliquefaciens_ssp_amyloliquefaciens_DSM_7_04</i> | Bacillales      | <i>Bacillus</i>      |
| <i>Bacillus_anthraxis_A1_01</i>                                  | Bacillales      | <i>Bacillus</i>      |
| <i>Bacillus_anthraxis_A1_02</i>                                  | Bacillales      | <i>Bacillus</i>      |
| <i>Bacillus_anthraxis_A1_03</i>                                  | Bacillales      | <i>Bacillus</i>      |
| <i>Bacillus_anthraxis_A1_04</i>                                  | Bacillales      | <i>Bacillus</i>      |

|                                          |            |                 |
|------------------------------------------|------------|-----------------|
| <i>Bacillus_atrophaeus_7264_01</i>       | Bacillales | <i>Bacillus</i> |
| <i>Bacillus_atrophaeus_7264_02</i>       | Bacillales | <i>Bacillus</i> |
| <i>Bacillus_atrophaeus_7264_03</i>       | Bacillales | <i>Bacillus</i> |
| <i>Bacillus_atrophaeus_7264_04</i>       | Bacillales | <i>Bacillus</i> |
| <i>Bacillus_bataviensis_DSM_15601_01</i> | Bacillales | <i>Bacillus</i> |
| <i>Bacillus_bataviensis_DSM_15601_02</i> | Bacillales | <i>Bacillus</i> |
| <i>Bacillus_bataviensis_DSM_15601_03</i> | Bacillales | <i>Bacillus</i> |
| <i>Bacillus_bataviensis_DSM_15601_04</i> | Bacillales | <i>Bacillus</i> |
| <i>Bacillus_clarkii_DSM_9725_01</i>      | Bacillales | <i>Bacillus</i> |
| <i>Bacillus_clarkii_DSM_9725_02</i>      | Bacillales | <i>Bacillus</i> |
| <i>Bacillus_clarkii_DSM_9725_03</i>      | Bacillales | <i>Bacillus</i> |
| <i>Bacillus_clarkii_DSM_9725_04</i>      | Bacillales | <i>Bacillus</i> |
| <i>Bacillus_clausii_DSM_8716_01</i>      | Bacillales | <i>Bacillus</i> |
| <i>Bacillus_clausii_DSM_8716_02</i>      | Bacillales | <i>Bacillus</i> |
| <i>Bacillus_clausii_DSM_8716_03</i>      | Bacillales | <i>Bacillus</i> |
| <i>Bacillus_clausii_DSM_8716_04</i>      | Bacillales | <i>Bacillus</i> |
| <i>Bacillus_coagulans_DSM_1_01</i>       | Bacillales | <i>Bacillus</i> |
| <i>Bacillus_coagulans_DSM_1_02</i>       | Bacillales | <i>Bacillus</i> |
| <i>Bacillus_coagulans_DSM_1_03</i>       | Bacillales | <i>Bacillus</i> |
| <i>Bacillus_coagulans_DSM_1_04</i>       | Bacillales | <i>Bacillus</i> |
| <i>Bacillus_cohnii_DSM_6350_01</i>       | Bacillales | <i>Bacillus</i> |
| <i>Bacillus_cohnii_DSM_6350_02</i>       | Bacillales | <i>Bacillus</i> |
| <i>Bacillus_cohnii_DSM_6350_03</i>       | Bacillales | <i>Bacillus</i> |
| <i>Bacillus_cohnii_DSM_6350_04</i>       | Bacillales | <i>Bacillus</i> |
| <i>Bacillus_cucumis_DSM_101566_01</i>    | Bacillales | <i>Bacillus</i> |
| <i>Bacillus_cucumis_DSM_101566_02</i>    | Bacillales | <i>Bacillus</i> |
| <i>Bacillus_cucumis_DSM_101566_03</i>    | Bacillales | <i>Bacillus</i> |
| <i>Bacillus_cucumis_DSM_101566_04</i>    | Bacillales | <i>Bacillus</i> |
| <i>Bacillus_cytotoxicus_DSM_22905_01</i> | Bacillales | <i>Bacillus</i> |
| <i>Bacillus_cytotoxicus_DSM_22905_02</i> | Bacillales | <i>Bacillus</i> |

|                                             |            |                 |
|---------------------------------------------|------------|-----------------|
| <i>Bacillus_cytotoxicus_DSM_22905_03</i>    | Bacillales | <i>Bacillus</i> |
| <i>Bacillus_cytotoxicus_DSM_22905_04</i>    | Bacillales | <i>Bacillus</i> |
| <i>Bacillus_ectoiniformans_DSM_28970_01</i> | Bacillales | <i>Bacillus</i> |
| <i>Bacillus_ectoiniformans_DSM_28970_02</i> | Bacillales | <i>Bacillus</i> |
| <i>Bacillus_ectoiniformans_DSM_28970_03</i> | Bacillales | <i>Bacillus</i> |
| <i>Bacillus_ectoiniformans_DSM_28970_04</i> | Bacillales | <i>Bacillus</i> |
| <i>Bacillus_encimensis_DSM_28241_01</i>     | Bacillales | <i>Bacillus</i> |
| <i>Bacillus_encimensis_DSM_28241_02</i>     | Bacillales | <i>Bacillus</i> |
| <i>Bacillus_encimensis_DSM_28241_03</i>     | Bacillales | <i>Bacillus</i> |
| <i>Bacillus_encimensis_DSM_28241_04</i>     | Bacillales | <i>Bacillus</i> |
| <i>Bacillus_firmus_DSM_12_01</i>            | Bacillales | <i>Bacillus</i> |
| <i>Bacillus_firmus_DSM_12_02</i>            | Bacillales | <i>Bacillus</i> |
| <i>Bacillus_flexus_DSM_1667_01</i>          | Bacillales | <i>Bacillus</i> |
| <i>Bacillus_flexus_DSM_1667_02</i>          | Bacillales | <i>Bacillus</i> |
| <i>Bacillus_flexus_DSM_1667_03</i>          | Bacillales | <i>Bacillus</i> |
| <i>Bacillus_flexus_DSM_1667_04</i>          | Bacillales | <i>Bacillus</i> |
| <i>Bacillus_halodurans_DSM_6940_01</i>      | Bacillales | <i>Bacillus</i> |
| <i>Bacillus_halodurans_DSM_6940_02</i>      | Bacillales | <i>Bacillus</i> |
| <i>Bacillus_halodurans_DSM_6940_03</i>      | Bacillales | <i>Bacillus</i> |
| <i>Bacillus_halodurans_DSM_6940_04</i>      | Bacillales | <i>Bacillus</i> |
| <i>Bacillus_halotolerans_18911_01</i>       | Bacillales | <i>Bacillus</i> |
| <i>Bacillus_halotolerans_18911_02</i>       | Bacillales | <i>Bacillus</i> |
| <i>Bacillus_halotolerans_18911_03</i>       | Bacillales | <i>Bacillus</i> |
| <i>Bacillus_halotolerans_18911_04</i>       | Bacillales | <i>Bacillus</i> |
| <i>Bacillus_horneckiae_23495_01</i>         | Bacillales | <i>Bacillus</i> |
| <i>Bacillus_horneckiae_23495_02</i>         | Bacillales | <i>Bacillus</i> |
| <i>Bacillus_horneckiae_23495_03</i>         | Bacillales | <i>Bacillus</i> |
| <i>Bacillus_horneckiae_23495_04</i>         | Bacillales | <i>Bacillus</i> |
| <i>Bacillus_infantis_DSM_19089_01</i>       | Bacillales | <i>Bacillus</i> |
| <i>Bacillus_infantis_DSM_19089_02</i>       | Bacillales | <i>Bacillus</i> |

|                                                 |            |                 |
|-------------------------------------------------|------------|-----------------|
| <i>Bacillus_infantis_DSM_19089_03</i>           | Bacillales | <i>Bacillus</i> |
| <i>Bacillus_infantis_DSM_19089_04</i>           | Bacillales | <i>Bacillus</i> |
| <i>Bacillus_lentus_DSM_5221_01</i>              | Bacillales | <i>Bacillus</i> |
| <i>Bacillus_lentus_DSM_5221_02</i>              | Bacillales | <i>Bacillus</i> |
| <i>Bacillus_lentus_DSM_5221_03</i>              | Bacillales | <i>Bacillus</i> |
| <i>Bacillus_lentus_DSM_5221_04</i>              | Bacillales | <i>Bacillus</i> |
| <i>Bacillus_licheniformis_DSM_13_01</i>         | Bacillales | <i>Bacillus</i> |
| <i>Bacillus_licheniformis_DSM_13_02</i>         | Bacillales | <i>Bacillus</i> |
| <i>Bacillus_megaterium_DSM_90_01</i>            | Bacillales | <i>Bacillus</i> |
| <i>Bacillus_megaterium_DSM_90_02</i>            | Bacillales | <i>Bacillus</i> |
| <i>Bacillus_mojavensis_DSM9206_01</i>           | Bacillales | <i>Bacillus</i> |
| <i>Bacillus_mojavensis_DSM9206_02</i>           | Bacillales | <i>Bacillus</i> |
| <i>Bacillus_mojavensis_DSM9206_03</i>           | Bacillales | <i>Bacillus</i> |
| <i>Bacillus_mojavensis_DSM9206_04</i>           | Bacillales | <i>Bacillus</i> |
| <i>Bacillus_muralis_DSM16288_01</i>             | Bacillales | <i>Bacillus</i> |
| <i>Bacillus_muralis_DSM16288_02</i>             | Bacillales | <i>Bacillus</i> |
| <i>Bacillus_muralis_DSM16288_03</i>             | Bacillales | <i>Bacillus</i> |
| <i>Bacillus_muralis_DSM16288_04</i>             | Bacillales | <i>Bacillus</i> |
| <i>Bacillus_mycoides_DSM_2048_01</i>            | Bacillales | <i>Bacillus</i> |
| <i>Bacillus_mycoides_DSM_2048_02</i>            | Bacillales | <i>Bacillus</i> |
| <i>Bacillus_mycoides_DSM_2048_03</i>            | Bacillales | <i>Bacillus</i> |
| <i>Bacillus_pseudomycoides_DSM_12442_01</i>     | Bacillales | <i>Bacillus</i> |
| <i>Bacillus_pseudomycoides_DSM_12442_02</i>     | Bacillales | <i>Bacillus</i> |
| <i>Bacillus_pseudomycoides_DSM_12442_03</i>     | Bacillales | <i>Bacillus</i> |
| <i>Bacillus_pseudomycoides_DSM_12442_04</i>     | Bacillales | <i>Bacillus</i> |
| <i>Bacillus_psychrosaccharolyticus_DSM_6_01</i> | Bacillales | <i>Bacillus</i> |
| <i>Bacillus_psychrosaccharolyticus_DSM_6_02</i> | Bacillales | <i>Bacillus</i> |
| <i>Bacillus_psychrosaccharolyticus_DSM_6_03</i> | Bacillales | <i>Bacillus</i> |
| <i>Bacillus_psychrosaccharolyticus_DSM_6_04</i> | Bacillales | <i>Bacillus</i> |
| <i>Bacillus_pumilus_DSM_13835_01</i>            | Bacillales | <i>Bacillus</i> |

|                                                |            |                 |
|------------------------------------------------|------------|-----------------|
| <i>Bacillus_pumilus_DSM_13835_02</i>           | Bacillales | <i>Bacillus</i> |
| <i>Bacillus_salarius_DSM16461_01</i>           | Bacillales | <i>Bacillus</i> |
| <i>Bacillus_salarius_DSM16461_02</i>           | Bacillales | <i>Bacillus</i> |
| <i>Bacillus_salarius_DSM16461_03</i>           | Bacillales | <i>Bacillus</i> |
| <i>Bacillus_salarius_DSM16461_04</i>           | Bacillales | <i>Bacillus</i> |
| <i>Bacillus_siamensis_25261_01</i>             | Bacillales | <i>Bacillus</i> |
| <i>Bacillus_siamensis_25261_02</i>             | Bacillales | <i>Bacillus</i> |
| <i>Bacillus_siamensis_25261_03</i>             | Bacillales | <i>Bacillus</i> |
| <i>Bacillus_siamensis_25261_04</i>             | Bacillales | <i>Bacillus</i> |
| <i>Bacillus_simplex_DSM_1321_01</i>            | Bacillales | <i>Bacillus</i> |
| <i>Bacillus_simplex_DSM_1321_02</i>            | Bacillales | <i>Bacillus</i> |
| <i>Bacillus_simplex_DSM_1321_03</i>            | Bacillales | <i>Bacillus</i> |
| <i>Bacillus_simplex_DSM_1321_04</i>            | Bacillales | <i>Bacillus</i> |
| <i>Bacillus_sonorensis_DSM_13779_01</i>        | Bacillales | <i>Bacillus</i> |
| <i>Bacillus_sonorensis_DSM_13779_02</i>        | Bacillales | <i>Bacillus</i> |
| <i>Bacillus_sonorensis_DSM_13779_03</i>        | Bacillales | <i>Bacillus</i> |
| <i>Bacillus_sonorensis_DSM_13779_04</i>        | Bacillales | <i>Bacillus</i> |
| <i>Bacillus_sporothermodurans_DSM_10599_01</i> | Bacillales | <i>Bacillus</i> |
| <i>Bacillus_sporothermodurans_DSM_10599_02</i> | Bacillales | <i>Bacillus</i> |
| <i>Bacillus_sporothermodurans_DSM_10599_03</i> | Bacillales | <i>Bacillus</i> |
| <i>Bacillus_sporothermodurans_DSM_10599_04</i> | Bacillales | <i>Bacillus</i> |
| <i>Bacillus_subtilis_DSM_347_01</i>            | Bacillales | <i>Bacillus</i> |
| <i>Bacillus_subtilis_DSM_347_02</i>            | Bacillales | <i>Bacillus</i> |
| <i>Bacillus_subtilis_DSM_347_03</i>            | Bacillales | <i>Bacillus</i> |
| <i>Bacillus_subtilis_DSM_347_04</i>            | Bacillales | <i>Bacillus</i> |
| <i>Bacillus_thuringiensis_DSM_6073_01</i>      | Bacillales | <i>Bacillus</i> |
| <i>Bacillus_thuringiensis_DSM_6073_02</i>      | Bacillales | <i>Bacillus</i> |
| <i>Bacillus_thuringiensis_DSM_6073_03</i>      | Bacillales | <i>Bacillus</i> |
| <i>Bacillus_thuringiensis_DSM_6073_04</i>      | Bacillales | <i>Bacillus</i> |
| <i>Bacillus_vallismortis_DSM_11031_01</i>      | Bacillales | <i>Bacillus</i> |

|                                                          |             |                 |
|----------------------------------------------------------|-------------|-----------------|
| <i>Bacillus_vallismortis_DSM_11031_02</i>                | Bacillales  | <i>Bacillus</i> |
| <i>Bacillus_vallismortis_DSM_11031_03</i>                | Bacillales  | <i>Bacillus</i> |
| <i>Bacillus_vallismortis_DSM_11031_04</i>                | Bacillales  | <i>Bacillus</i> |
| <i>Bacillus_weihenstephanensis_DSM_104119_01</i>         | Bacillales  | <i>Bacillus</i> |
| <i>Bacillus_weihenstephanensis_DSM_104119_02</i>         | Bacillales  | <i>Bacillus</i> |
| <i>Bacillus_weihenstephanensis_DSM_104119_03</i>         | Bacillales  | <i>Bacillus</i> |
| <i>Bacillus_weihenstephanensis_DSM_104119_04</i>         | Bacillales  | <i>Bacillus</i> |
| <i>Brucella_abortus_S19_delta_01</i>                     | Rhizobiales | <i>Brucella</i> |
| <i>Brucella_abortus_S19_delta_02</i>                     | Rhizobiales | <i>Brucella</i> |
| <i>Brucella_abortus_S19_delta_03</i>                     | Rhizobiales | <i>Brucella</i> |
| <i>Brucella_abortus_S19_delta_04</i>                     | Rhizobiales | <i>Brucella</i> |
| <i>Brucella_canis_A183_5_01</i>                          | Rhizobiales | <i>Brucella</i> |
| <i>Brucella_canis_A183_5_02</i>                          | Rhizobiales | <i>Brucella</i> |
| <i>Brucella_canis_A183_5_03</i>                          | Rhizobiales | <i>Brucella</i> |
| <i>Brucella_canis_A183_5_04</i>                          | Rhizobiales | <i>Brucella</i> |
| <i>Brucella_melitensis_A146_13_Ringversuch_A938_3_01</i> | Rhizobiales | <i>Brucella</i> |
| <i>Brucella_melitensis_A146_13_Ringversuch_A938_3_02</i> | Rhizobiales | <i>Brucella</i> |
| <i>Brucella_melitensis_A146_13_Ringversuch_A938_3_03</i> | Rhizobiales | <i>Brucella</i> |
| <i>Brucella_melitensis_A146_13_Ringversuch_A938_3_04</i> | Rhizobiales | <i>Brucella</i> |
| <i>Brucella_microti_CCM_4915_01</i>                      | Rhizobiales | <i>Brucella</i> |
| <i>Brucella_microti_CCM_4915_02</i>                      | Rhizobiales | <i>Brucella</i> |
| <i>Brucella_neotomae_A148_7_01</i>                       | Rhizobiales | <i>Brucella</i> |
| <i>Brucella_neotomae_A148_7_02</i>                       | Rhizobiales | <i>Brucella</i> |
| <i>Brucella_neotomae_A148_7_03</i>                       | Rhizobiales | <i>Brucella</i> |
| <i>Brucella_neotomae_A148_7_04</i>                       | Rhizobiales | <i>Brucella</i> |
| <i>Brucella_ovis_A138_7_01</i>                           | Rhizobiales | <i>Brucella</i> |
| <i>Brucella_ovis_A138_7_02</i>                           | Rhizobiales | <i>Brucella</i> |
| <i>Brucella_ovis_A138_7_03</i>                           | Rhizobiales | <i>Brucella</i> |
| <i>Brucella_ovis_A138_7_04</i>                           | Rhizobiales | <i>Brucella</i> |
| <i>Brucella_pinnipedialis_A148_8_01</i>                  | Rhizobiales | <i>Brucella</i> |

|                                                 |                 |                     |
|-------------------------------------------------|-----------------|---------------------|
| <i>Brucella_pinnipedialis_A148_8_02</i>         | Rhizobiales     | <i>Brucella</i>     |
| <i>Brucella_pinnipedialis_A148_8_03</i>         | Rhizobiales     | <i>Brucella</i>     |
| <i>Brucella_pinnipedialis_A148_8_04</i>         | Rhizobiales     | <i>Brucella</i>     |
| <i>Brucella_vulpis_DSM_101715_01</i>            | Rhizobiales     | <i>Brucella</i>     |
| <i>Brucella_vulpis_DSM_101715_02</i>            | Rhizobiales     | <i>Brucella</i>     |
| <i>Brucella_vulpis_DSM_101715_03</i>            | Rhizobiales     | <i>Brucella</i>     |
| <i>Brucella_vulpis_DSM_101715_04</i>            | Rhizobiales     | <i>Brucella</i>     |
| <i>Burkholderia_caledonica_LMG_19076_01</i>     | Burkholderiales | <i>Burkholderia</i> |
| <i>Burkholderia_caledonica_LMG_19076_02</i>     | Burkholderiales | <i>Burkholderia</i> |
| <i>Burkholderia_caledonica_LMG_19076_03</i>     | Burkholderiales | <i>Burkholderia</i> |
| <i>Burkholderia_caribensis_LMG_18531_01</i>     | Burkholderiales | <i>Burkholderia</i> |
| <i>Burkholderia_caribensis_LMG_18531_02</i>     | Burkholderiales | <i>Burkholderia</i> |
| <i>Burkholderia_caribensis_LMG_18531_03</i>     | Burkholderiales | <i>Burkholderia</i> |
| <i>Burkholderia_CC_ambifaria_DSM_16087_01</i>   | Burkholderiales | <i>Burkholderia</i> |
| <i>Burkholderia_CC_ambifaria_DSM_16087_02</i>   | Burkholderiales | <i>Burkholderia</i> |
| <i>Burkholderia_CC_ambifaria_DSM_16087_03</i>   | Burkholderiales | <i>Burkholderia</i> |
| <i>Burkholderia_CC_ambifaria_DSM_16087_04</i>   | Burkholderiales | <i>Burkholderia</i> |
| <i>Burkholderia_CC_anthina_DSM_16086_01</i>     | Burkholderiales | <i>Burkholderia</i> |
| <i>Burkholderia_CC_anthina_DSM_16086_02</i>     | Burkholderiales | <i>Burkholderia</i> |
| <i>Burkholderia_CC_anthina_DSM_16086_03</i>     | Burkholderiales | <i>Burkholderia</i> |
| <i>Burkholderia_CC_anthina_DSM_16086_04</i>     | Burkholderiales | <i>Burkholderia</i> |
| <i>Burkholderia_CC_arboris_DSM_23435_01</i>     | Burkholderiales | <i>Burkholderia</i> |
| <i>Burkholderia_CC_arboris_DSM_23435_02</i>     | Burkholderiales | <i>Burkholderia</i> |
| <i>Burkholderia_CC_arboris_DSM_23435_03</i>     | Burkholderiales | <i>Burkholderia</i> |
| <i>Burkholderia_CC_arboris_DSM_23435_04</i>     | Burkholderiales | <i>Burkholderia</i> |
| <i>Burkholderia_CC_cenocepacia_DSM_16553_01</i> | Burkholderiales | <i>Burkholderia</i> |
| <i>Burkholderia_CC_cenocepacia_DSM_16553_02</i> | Burkholderiales | <i>Burkholderia</i> |
| <i>Burkholderia_CC_cenocepacia_DSM_16553_03</i> | Burkholderiales | <i>Burkholderia</i> |
| <i>Burkholderia_CC_cenocepacia_DSM_16553_04</i> | Burkholderiales | <i>Burkholderia</i> |
| <i>Burkholderia_CC_cepacia_DSM_7288_01</i>      | Burkholderiales | <i>Burkholderia</i> |



|                                                        |                 |                     |
|--------------------------------------------------------|-----------------|---------------------|
| <i>Burkholderia</i> _CC_cepacia_DSM_7288_02            | Burkholderiales | <i>Burkholderia</i> |
| <i>Burkholderia</i> _CC_cepacia_DSM_7288_03            | Burkholderiales | <i>Burkholderia</i> |
| <i>Burkholderia</i> _CC_contaminans_DSM_22706_01       | Burkholderiales | <i>Burkholderia</i> |
| <i>Burkholderia</i> _CC_contaminans_DSM_22706_02       | Burkholderiales | <i>Burkholderia</i> |
| <i>Burkholderia</i> _CC_contaminans_DSM_22706_03       | Burkholderiales | <i>Burkholderia</i> |
| <i>Burkholderia</i> _CC_contaminans_DSM_22706_04       | Burkholderiales | <i>Burkholderia</i> |
| <i>Burkholderia</i> _CC_diffusa_DSM_23434_01           | Burkholderiales | <i>Burkholderia</i> |
| <i>Burkholderia</i> _CC_diffusa_DSM_23434_02           | Burkholderiales | <i>Burkholderia</i> |
| <i>Burkholderia</i> _CC_diffusa_DSM_23434_03           | Burkholderiales | <i>Burkholderia</i> |
| <i>Burkholderia</i> _CC_diffusa_DSM_23434_04           | Burkholderiales | <i>Burkholderia</i> |
| <i>Burkholderia</i> _CC_dolosa_DSM_16088_01            | Burkholderiales | <i>Burkholderia</i> |
| <i>Burkholderia</i> _CC_dolosa_DSM_16088_02            | Burkholderiales | <i>Burkholderia</i> |
| <i>Burkholderia</i> _CC_dolosa_DSM_16088_03            | Burkholderiales | <i>Burkholderia</i> |
| <i>Burkholderia</i> _CC_dolosa_DSM_16088_04            | Burkholderiales | <i>Burkholderia</i> |
| <i>Burkholderia</i> _CC_lata_DSM_23089_01              | Burkholderiales | <i>Burkholderia</i> |
| <i>Burkholderia</i> _CC_lata_DSM_23089_02              | Burkholderiales | <i>Burkholderia</i> |
| <i>Burkholderia</i> _CC_lata_DSM_23089_03              | Burkholderiales | <i>Burkholderia</i> |
| <i>Burkholderia</i> _CC_lata_DSM_23089_04              | Burkholderiales | <i>Burkholderia</i> |
| <i>Burkholderia</i> _CC_latens_DSM_23436_01            | Burkholderiales | <i>Burkholderia</i> |
| <i>Burkholderia</i> _CC_latens_DSM_23436_02            | Burkholderiales | <i>Burkholderia</i> |
| <i>Burkholderia</i> _CC_latens_DSM_23436_03            | Burkholderiales | <i>Burkholderia</i> |
| <i>Burkholderia</i> _CC_latens_DSM_23436_04            | Burkholderiales | <i>Burkholderia</i> |
| <i>Burkholderia</i> _CC_metallica_DSM_23519_01         | Burkholderiales | <i>Burkholderia</i> |
| <i>Burkholderia</i> _CC_metallica_DSM_23519_02         | Burkholderiales | <i>Burkholderia</i> |
| <i>Burkholderia</i> _CC_metallica_DSM_23519_03         | Burkholderiales | <i>Burkholderia</i> |
| <i>Burkholderia</i> _CC_metallica_DSM_23519_04         | Burkholderiales | <i>Burkholderia</i> |
| <i>Burkholderia</i> _CC_multivorans_ATCC_17616_01      | Burkholderiales | <i>Burkholderia</i> |
| <i>Burkholderia</i> _CC_multivorans_ATCC_17616_02      | Burkholderiales | <i>Burkholderia</i> |
| <i>Burkholderia</i> _CC_multivorans_ATCC_17616_03      | Burkholderiales | <i>Burkholderia</i> |
| <i>Burkholderia</i> _CC_pseudomultivorans_LMG_16669_01 | Burkholderiales | <i>Burkholderia</i> |

|                                                            |                 |                     |
|------------------------------------------------------------|-----------------|---------------------|
| <i>Burkholderia</i> _CC_pseudomultivorans_LMG_16669_02     | Burkholderiales | <i>Burkholderia</i> |
| <i>Burkholderia</i> _CC_pseudomultivorans_LMG_16669_03     | Burkholderiales | <i>Burkholderia</i> |
| <i>Burkholderia</i> _CC_pseudomultivorans_LMG_16669_04     | Burkholderiales | <i>Burkholderia</i> |
| <i>Burkholderia</i> _CC_puraquae_CAMPA_565_HST_189_01      | Burkholderiales | <i>Burkholderia</i> |
| <i>Burkholderia</i> _CC_puraquae_CAMPA_565_HST_189_02      | Burkholderiales | <i>Burkholderia</i> |
| <i>Burkholderia</i> _CC_puraquae_CAMPA_565_HST_189_03      | Burkholderiales | <i>Burkholderia</i> |
| <i>Burkholderia</i> _CC_puraquae_CAMPA_565_HST_189_04      | Burkholderiales | <i>Burkholderia</i> |
| <i>Burkholderia</i> _CC_pyrrocinia_ATCC_15958_DSM_10685_01 | Burkholderiales | <i>Burkholderia</i> |
| <i>Burkholderia</i> _CC_pyrrocinia_ATCC_15958_DSM_10685_02 | Burkholderiales | <i>Burkholderia</i> |
| <i>Burkholderia</i> _CC_pyrrocinia_ATCC_15958_DSM_10685_03 | Burkholderiales | <i>Burkholderia</i> |
| <i>Burkholderia</i> _CC_pyrrocinia_ATCC_15958_DSM_10685_04 | Burkholderiales | <i>Burkholderia</i> |
| <i>Burkholderia</i> _CC_seminalis_DSM_23518_01             | Burkholderiales | <i>Burkholderia</i> |
| <i>Burkholderia</i> _CC_seminalis_DSM_23518_02             | Burkholderiales | <i>Burkholderia</i> |
| <i>Burkholderia</i> _CC_seminalis_DSM_23518_03             | Burkholderiales | <i>Burkholderia</i> |
| <i>Burkholderia</i> _CC_seminalis_DSM_23518_04             | Burkholderiales | <i>Burkholderia</i> |
| <i>Burkholderia</i> _CC_stabilis_DSM_16586_LMG_14294_01    | Burkholderiales | <i>Burkholderia</i> |
| <i>Burkholderia</i> _CC_stabilis_DSM_16586_LMG_14294_02    | Burkholderiales | <i>Burkholderia</i> |
| <i>Burkholderia</i> _CC_stabilis_DSM_16586_LMG_14294_03    | Burkholderiales | <i>Burkholderia</i> |
| <i>Burkholderia</i> _CC_stabilis_DSM_16586_LMG_14294_04    | Burkholderiales | <i>Burkholderia</i> |
| <i>Burkholderia</i> _CC_stagnalis_LMG_28156_01             | Burkholderiales | <i>Burkholderia</i> |
| <i>Burkholderia</i> _CC_stagnalis_LMG_28156_02             | Burkholderiales | <i>Burkholderia</i> |
| <i>Burkholderia</i> _CC_stagnalis_LMG_28156_03             | Burkholderiales | <i>Burkholderia</i> |
| <i>Burkholderia</i> _CC_stagnalis_LMG_28156_04             | Burkholderiales | <i>Burkholderia</i> |
| <i>Burkholderia</i> _CC_territorii_LMG_28158_01            | Burkholderiales | <i>Burkholderia</i> |
| <i>Burkholderia</i> _CC_territorii_LMG_28158_02            | Burkholderiales | <i>Burkholderia</i> |
| <i>Burkholderia</i> _CC_territorii_LMG_28158_03            | Burkholderiales | <i>Burkholderia</i> |
| <i>Burkholderia</i> _CC_territorii_LMG_28158_04            | Burkholderiales | <i>Burkholderia</i> |
| <i>Burkholderia</i> _CC_ubonensis_DSM_17311_01             | Burkholderiales | <i>Burkholderia</i> |
| <i>Burkholderia</i> _CC_ubonensis_DSM_17311_02             | Burkholderiales | <i>Burkholderia</i> |
| <i>Burkholderia</i> _CC_ubonensis_DSM_17311_03             | Burkholderiales | <i>Burkholderia</i> |

|                                                    |                 |                     |
|----------------------------------------------------|-----------------|---------------------|
| <i>Burkholderia</i> _CC_ubonensis_DSM_17311_04     | Burkholderiales | <i>Burkholderia</i> |
| <i>Burkholderia</i> _CC_vietnamiensis_LMG_10929_01 | Burkholderiales | <i>Burkholderia</i> |
| <i>Burkholderia</i> _CC_vietnamiensis_LMG_10929_02 | Burkholderiales | <i>Burkholderia</i> |
| <i>Burkholderia</i> _CC_vietnamiensis_LMG_10929_03 | Burkholderiales | <i>Burkholderia</i> |
| <i>Burkholderia</i> _CC_vietnamiensis_LMG_10929_04 | Burkholderiales | <i>Burkholderia</i> |
| <i>Burkholderia</i> _gladioli_DSM_8361_01          | Burkholderiales | <i>Burkholderia</i> |
| <i>Burkholderia</i> _gladioli_DSM_8361_02          | Burkholderiales | <i>Burkholderia</i> |
| <i>Burkholderia</i> _gladioli_DSM_8361_03          | Burkholderiales | <i>Burkholderia</i> |
| <i>Burkholderia</i> _gladioli_DSM_8361_04          | Burkholderiales | <i>Burkholderia</i> |
| <i>Burkholderia</i> _glathei_LMG_14190_01          | Burkholderiales | <i>Burkholderia</i> |
| <i>Burkholderia</i> _glathei_LMG_14190_02          | Burkholderiales | <i>Burkholderia</i> |
| <i>Burkholderia</i> _glathei_LMG_14190_03          | Burkholderiales | <i>Burkholderia</i> |
| <i>Burkholderia</i> _glumae_LMG_1277_01            | Burkholderiales | <i>Burkholderia</i> |
| <i>Burkholderia</i> _glumae_LMG_1277_02            | Burkholderiales | <i>Burkholderia</i> |
| <i>Burkholderia</i> _glumae_LMG_1277_03            | Burkholderiales | <i>Burkholderia</i> |
| <i>Burkholderia</i> _hospita_LMG_20574_01          | Burkholderiales | <i>Burkholderia</i> |
| <i>Burkholderia</i> _hospita_LMG_20574_02          | Burkholderiales | <i>Burkholderia</i> |
| <i>Burkholderia</i> _hospita_LMG_20574_03          | Burkholderiales | <i>Burkholderia</i> |
| <i>Burkholderia</i> _kururiensis_DSM_13464_01      | Burkholderiales | <i>Burkholderia</i> |
| <i>Burkholderia</i> _kururiensis_DSM_13464_02      | Burkholderiales | <i>Burkholderia</i> |
| <i>Burkholderia</i> _kururiensis_DSM_13464_03      | Burkholderiales | <i>Burkholderia</i> |
| <i>Burkholderia</i> _kururiensis_DSM_13464_04      | Burkholderiales | <i>Burkholderia</i> |
| <i>Burkholderia</i> _mallei_ATCC_23344_01          | Burkholderiales | <i>Burkholderia</i> |
| <i>Burkholderia</i> _mallei_ATCC_23344_02          | Burkholderiales | <i>Burkholderia</i> |
| <i>Burkholderia</i> _mallei_ATCC_23344_03          | Burkholderiales | <i>Burkholderia</i> |
| <i>Burkholderia</i> _mallei_ATCC_23344_04          | Burkholderiales | <i>Burkholderia</i> |
| <i>Burkholderia</i> _oklahomensis_DSM_21774_01     | Burkholderiales | <i>Burkholderia</i> |
| <i>Burkholderia</i> _oklahomensis_DSM_21774_02     | Burkholderiales | <i>Burkholderia</i> |
| <i>Burkholderia</i> _oklahomensis_DSM_21774_03     | Burkholderiales | <i>Burkholderia</i> |
| <i>Burkholderia</i> _oklahomensis_DSM_21774_04     | Burkholderiales | <i>Burkholderia</i> |

|                                                |                   |                      |
|------------------------------------------------|-------------------|----------------------|
| <i>Burkholderia_phymatum_DSM_17167_01</i>      | Burkholderiales   | <i>Burkholderia</i>  |
| <i>Burkholderia_phymatum_DSM_17167_02</i>      | Burkholderiales   | <i>Burkholderia</i>  |
| <i>Burkholderia_phymatum_DSM_17167_03</i>      | Burkholderiales   | <i>Burkholderia</i>  |
| <i>Burkholderia_phytofirmans_DSM_17436_01</i>  | Burkholderiales   | <i>Burkholderia</i>  |
| <i>Burkholderia_phytofirmans_DSM_17436_02</i>  | Burkholderiales   | <i>Burkholderia</i>  |
| <i>Burkholderia_phytofirmans_DSM_17436_03</i>  | Burkholderiales   | <i>Burkholderia</i>  |
| <i>Burkholderia_plantarum_LMG_10907_01</i>     | Burkholderiales   | <i>Burkholderia</i>  |
| <i>Burkholderia_plantarum_LMG_10907_02</i>     | Burkholderiales   | <i>Burkholderia</i>  |
| <i>Burkholderia_plantarum_LMG_10907_03</i>     | Burkholderiales   | <i>Burkholderia</i>  |
| <i>Burkholderia_pseudomallei_CCUC_13790_01</i> | Burkholderiales   | <i>Burkholderia</i>  |
| <i>Burkholderia_pseudomallei_CCUC_13790_02</i> | Burkholderiales   | <i>Burkholderia</i>  |
| <i>Burkholderia_pseudomallei_CCUC_13790_03</i> | Burkholderiales   | <i>Burkholderia</i>  |
| <i>Burkholderia_thailandensis_DSM_13276_01</i> | Burkholderiales   | <i>Burkholderia</i>  |
| <i>Burkholderia_thailandensis_DSM_13276_02</i> | Burkholderiales   | <i>Burkholderia</i>  |
| <i>Burkholderia_thailandensis_DSM_13276_03</i> | Burkholderiales   | <i>Burkholderia</i>  |
| <i>Burkholderia_tuberum_LMG_21444_01</i>       | Burkholderiales   | <i>Burkholderia</i>  |
| <i>Burkholderia_tuberum_LMG_21444_02</i>       | Burkholderiales   | <i>Burkholderia</i>  |
| <i>Burkholderia_tuberum_LMG_21444_03</i>       | Burkholderiales   | <i>Burkholderia</i>  |
| <i>Burkholderia_xenovorans_DSM_17367_01</i>    | Burkholderiales   | <i>Burkholderia</i>  |
| <i>Burkholderia_xenovorans_DSM_17367_02</i>    | Burkholderiales   | <i>Burkholderia</i>  |
| <i>Burkholderia_xenovorans_DSM_17367_03</i>    | Burkholderiales   | <i>Burkholderia</i>  |
| <i>Campylobacter_jejuni_A669_01</i>            | Campylobacterales | <i>Campylobacter</i> |
| <i>Campylobacter_jejuni_A669_02</i>            | Campylobacterales | <i>Campylobacter</i> |
| <i>Campylobacter_jejuni_A669_03</i>            | Campylobacterales | <i>Campylobacter</i> |
| <i>Campylobacter_jejuni_A669_04</i>            | Campylobacterales | <i>Campylobacter</i> |
| <i>Citrobacter_amalonaticus_04_08695_01</i>    | Enterobacteriales | <i>Citrobacter</i>   |
| <i>Citrobacter_amalonaticus_04_08695_02</i>    | Enterobacteriales | <i>Citrobacter</i>   |
| <i>Citrobacter_diversus_ATCC_25408_01</i>      | Enterobacteriales | <i>Citrobacter</i>   |
| <i>Citrobacter_diversus_ATCC_25408_02</i>      | Enterobacteriales | <i>Citrobacter</i>   |
| <i>Citrobacter_freundii_DSM_30039_01</i>       | Enterobacteriales | <i>Citrobacter</i>   |

|                                                  |                   |                        |
|--------------------------------------------------|-------------------|------------------------|
| <i>Citrobacter freundii</i> _DSM_30039_02        | Enterobacteriales | <i>Citrobacter</i>     |
| <i>Citrobacter freundii</i> _DSM_30039_03        | Enterobacteriales | <i>Citrobacter</i>     |
| <i>Citrobacter freundii</i> _DSM_30039_04        | Enterobacteriales | <i>Citrobacter</i>     |
| <i>Corynebacterium amycolatum</i> _RRLK02_02_01  | Actinomycetales   | <i>Corynebacterium</i> |
| <i>Corynebacterium amycolatum</i> _RRLK02_02_02  | Actinomycetales   | <i>Corynebacterium</i> |
| <i>Corynebacterium amycolatum</i> _RRLK02_02_03  | Actinomycetales   | <i>Corynebacterium</i> |
| <i>Corynebacterium amycolatum</i> _RRLK02_02_04  | Actinomycetales   | <i>Corynebacterium</i> |
| <i>Edwardsiella tarda</i> _DSM_30052_01          | Enterobacteriales | <i>Edwardsiella</i>    |
| <i>Edwardsiella tarda</i> _DSM_30052_02          | Enterobacteriales | <i>Edwardsiella</i>    |
| <i>Enterobacter aerogenes</i> _DSM_30053_01      | Enterobacteriales | <i>Enterobacter</i>    |
| <i>Enterobacter aerogenes</i> _DSM_30053_02      | Enterobacteriales | <i>Enterobacter</i>    |
| <i>Enterobacter cloacae</i> _DSM_30054_01        | Enterobacteriales | <i>Enterobacter</i>    |
| <i>Enterobacter cloacae</i> _DSM_30054_02        | Enterobacteriales | <i>Enterobacter</i>    |
| <i>Enterobacter gergoviae</i> _ATCC_33426_01     | Enterobacteriales | <i>Enterobacter</i>    |
| <i>Enterobacter gergoviae</i> _ATCC_33426_02     | Enterobacteriales | <i>Enterobacter</i>    |
| <i>Enterobacter sakazakii</i> _04_01242_01       | Enterobacteriales | <i>Enterobacter</i>    |
| <i>Enterobacter sakazakii</i> _04_01242_02       | Enterobacteriales | <i>Enterobacter</i>    |
| <i>Enterococcus faecalis</i> _DSM_20371_01       | Enterobacteriales | <i>Enterococcus</i>    |
| <i>Enterococcus faecalis</i> _DSM_20371_02       | Enterobacteriales | <i>Enterococcus</i>    |
| <i>Enterococcus faecalis</i> _DSM_20371_03       | Enterobacteriales | <i>Enterococcus</i>    |
| <i>Enterococcus faecalis</i> _DSM_20371_04       | Enterobacteriales | <i>Enterococcus</i>    |
| <i>Escherichia coli</i> _DSM_3871_01             | Enterobacteriales | <i>Escherichia</i>     |
| <i>Escherichia coli</i> _DSM_3871_02             | Enterobacteriales | <i>Escherichia</i>     |
| <i>Escherichia coli</i> _DSM_3871_03             | Enterobacteriales | <i>Escherichia</i>     |
| <i>Escherichia coli</i> _DSM_3871_04             | Enterobacteriales | <i>Escherichia</i>     |
| <i>Francisella guangzhouensis</i> _DSM_102975_01 | Thiotrichales     | <i>Francisella</i>     |
| <i>Francisella guangzhouensis</i> _DSM_102975_02 | Thiotrichales     | <i>Francisella</i>     |
| <i>Francisella guangzhouensis</i> _DSM_102975_03 | Thiotrichales     | <i>Francisella</i>     |
| <i>Francisella guangzhouensis</i> _DSM_102975_04 | Thiotrichales     | <i>Francisella</i>     |
| <i>Francisella hispaniensis</i> _DSM_22475_01    | Thiotrichales     | <i>Francisella</i>     |

|                                                            |                   |                    |
|------------------------------------------------------------|-------------------|--------------------|
| <i>Francisella_hispaniensis_DSM_22475_02</i>               | Thiotrichales     | <i>Francisella</i> |
| <i>Francisella_hispaniensis_DSM_22475_03</i>               | Thiotrichales     | <i>Francisella</i> |
| <i>Francisella_hispaniensis_DSM_22475_04</i>               | Thiotrichales     | <i>Francisella</i> |
| <i>Francisella_naotunensis_ssp_orientalis_DSM_21254_01</i> | Thiotrichales     | <i>Francisella</i> |
| <i>Francisella_naotunensis_ssp_orientalis_DSM_21254_02</i> | Thiotrichales     | <i>Francisella</i> |
| <i>Francisella_naotunensis_ssp_orientalis_DSM_21254_03</i> | Thiotrichales     | <i>Francisella</i> |
| <i>Francisella_naotunensis_ssp_orientalis_DSM_21254_04</i> | Thiotrichales     | <i>Francisella</i> |
| <i>Francisella_tularensis_novicida_Ft26_01</i>             | Thiotrichales     | <i>Francisella</i> |
| <i>Francisella_tularensis_novicida_Ft26_02</i>             | Thiotrichales     | <i>Francisella</i> |
| <i>Francisella_tularensis_novicida_Ft26_03</i>             | Thiotrichales     | <i>Francisella</i> |
| <i>Francisella_tularensis_novicida_Ft26_04</i>             | Thiotrichales     | <i>Francisella</i> |
| <i>Francisella_tularensis_ssp_mediasiatica_Ft31_01</i>     | Thiotrichales     | <i>Francisella</i> |
| <i>Francisella_tularensis_ssp_mediasiatica_Ft31_02</i>     | Thiotrichales     | <i>Francisella</i> |
| <i>Francisella_tularensis_ssp_mediasiatica_Ft31_03</i>     | Thiotrichales     | <i>Francisella</i> |
| <i>Francisella_tularensis_ssp_mediasiatica_Ft31_04</i>     | Thiotrichales     | <i>Francisella</i> |
| <i>Francisella_tularensis_subsp_holarctica_A466_1_01</i>   | Thiotrichales     | <i>Francisella</i> |
| <i>Francisella_tularensis_subsp_holarctica_A466_1_02</i>   | Thiotrichales     | <i>Francisella</i> |
| <i>Francisella_tularensis_subsp_holarctica_A466_1_03</i>   | Thiotrichales     | <i>Francisella</i> |
| <i>Francisella_tularensis_subsp_holarctica_A466_1_04</i>   | Thiotrichales     | <i>Francisella</i> |
| <i>Inquilinus_limosus_DSM_16000_01</i>                     | Rhodospirillales  | <i>Inquilinus</i>  |
| <i>Inquilinus_limosus_DSM_16000_02</i>                     | Rhodospirillales  | <i>Inquilinus</i>  |
| <i>Inquilinus_limosus_DSM_16000_03</i>                     | Rhodospirillales  | <i>Inquilinus</i>  |
| <i>Inquilinus_limosus_DSM_16000_04</i>                     | Rhodospirillales  | <i>Inquilinus</i>  |
| <i>Klebsiella_oxytoca_ATCC_13182_01</i>                    | Enterobacteriales | <i>Klebsiella</i>  |
| <i>Klebsiella_oxytoca_ATCC_13182_02</i>                    | Enterobacteriales | <i>Klebsiella</i>  |
| <i>Klebsiella_pneumoniae_ssp_ozeanae_DSM_68_01</i>         | Enterobacteriales | <i>Klebsiella</i>  |
| <i>Klebsiella_pneumoniae_ssp_ozeanae_DSM_68_02</i>         | Enterobacteriales | <i>Klebsiella</i>  |
| <i>Kocuria_palustris_RRLK06_02_01</i>                      | Actinomycetales   | <i>Kocuria</i>     |
| <i>Kocuria_palustris_RRLK06_02_02</i>                      | Actinomycetales   | <i>Kocuria</i>     |
| <i>Kocuria_palustris_RRLK06_02_03</i>                      | Actinomycetales   | <i>Kocuria</i>     |

|                                             |                 |                       |
|---------------------------------------------|-----------------|-----------------------|
| <i>Kocuria_palustris_RRLK06_02_04</i>       | Actinomycetales | <i>Kocuria</i>        |
| <i>Lysinibacillus_fusiformis_B207_01</i>    | Bacillales      | <i>Lysinibacillus</i> |
| <i>Lysinibacillus_fusiformis_B207_02</i>    | Bacillales      | <i>Lysinibacillus</i> |
| <i>Lysinibacillus_fusiformis_B207_03</i>    | Bacillales      | <i>Lysinibacillus</i> |
| <i>Lysinibacillus_fusiformis_B207_04</i>    | Bacillales      | <i>Lysinibacillus</i> |
| <i>Lysinibacillus_sphaericus_DSM_396_01</i> | Bacillales      | <i>Lysinibacillus</i> |
| <i>Lysinibacillus_sphaericus_DSM_396_02</i> | Bacillales      | <i>Lysinibacillus</i> |
| <i>Micrococcus_luteus_RRLK07_01</i>         | Actinomycetales | <i>Micrococcus</i>    |
| <i>Micrococcus_luteus_RRLK07_02</i>         | Actinomycetales | <i>Micrococcus</i>    |
| <i>Micrococcus_luteus_RRLK07_03</i>         | Actinomycetales | <i>Micrococcus</i>    |
| <i>Micrococcus_luteus_RRLK07_04</i>         | Actinomycetales | <i>Micrococcus</i>    |
| <i>Ochrobactrum_anthropi_DSM_20150_01</i>   | Rhizobiales     | <i>Ochrobactrum</i>   |
| <i>Ochrobactrum_anthropi_DSM_20150_02</i>   | Rhizobiales     | <i>Ochrobactrum</i>   |
| <i>Ochrobactrum_anthropi_DSM_20150_03</i>   | Rhizobiales     | <i>Ochrobactrum</i>   |
| <i>Ochrobactrum_anthropi_DSM_20150_04</i>   | Rhizobiales     | <i>Ochrobactrum</i>   |
| <i>Oligella_urethralis_A691_2_01</i>        | Burkholderiales | <i>Oligella</i>       |
| <i>Oligella_urethralis_A691_2_02</i>        | Burkholderiales | <i>Oligella</i>       |
| <i>Paenibacillus_alvei_B210_01</i>          | Bacillales      | <i>Paenibacillus</i>  |
| <i>Paenibacillus_alvei_B210_02</i>          | Bacillales      | <i>Paenibacillus</i>  |
| <i>Paenibacillus_alvei_B210_03</i>          | Bacillales      | <i>Paenibacillus</i>  |
| <i>Paenibacillus_alvei_B210_04</i>          | Bacillales      | <i>Paenibacillus</i>  |
| <i>Paenibacillus_polymyxa_DSM_365_01</i>    | Bacillales      | <i>Paenibacillus</i>  |
| <i>Paenibacillus_polymyxa_DSM_365_02</i>    | Bacillales      | <i>Paenibacillus</i>  |
| <i>Paenibacillus_polymyxa_DSM_365_03</i>    | Bacillales      | <i>Paenibacillus</i>  |
| <i>Paenibacillus_polymyxa_DSM_365_04</i>    | Bacillales      | <i>Paenibacillus</i>  |
| <i>Pandoraea_apista_DSM_16535_01</i>        | Burkholderiales | <i>Pandoraea</i>      |
| <i>Pandoraea_apista_DSM_16535_02</i>        | Burkholderiales | <i>Pandoraea</i>      |
| <i>Pandoraea_apista_DSM_16535_03</i>        | Burkholderiales | <i>Pandoraea</i>      |
| <i>Pandoraea_apista_DSM_16535_04</i>        | Burkholderiales | <i>Pandoraea</i>      |
| <i>Pandoraea_pnomenusa_DSM_16536_01</i>     | Burkholderiales | <i>Pandoraea</i>      |

|                                               |                   |                    |
|-----------------------------------------------|-------------------|--------------------|
| <i>Pandoraea_pnomenusa_DSM_16536_02</i>       | Burkholderiales   | <i>Pandoraea</i>   |
| <i>Pandoraea_pnomenusa_DSM_16536_03</i>       | Burkholderiales   | <i>Pandoraea</i>   |
| <i>Pandoraea_pnomenusa_DSM_16536_04</i>       | Burkholderiales   | <i>Pandoraea</i>   |
| <i>Pandoraea_pulmonicola_DSM_16583_01</i>     | Burkholderiales   | <i>Pandoraea</i>   |
| <i>Pandoraea_pulmonicola_DSM_16583_02</i>     | Burkholderiales   | <i>Pandoraea</i>   |
| <i>Pandoraea_pulmonicola_DSM_16583_03</i>     | Burkholderiales   | <i>Pandoraea</i>   |
| <i>Pandoraea_pulmonicola_DSM_16583_04</i>     | Burkholderiales   | <i>Pandoraea</i>   |
| <i>Pantoea_agglomerans_ATCC_27988_01</i>      | Enterobacteriales | <i>Pantoea</i>     |
| <i>Pantoea_agglomerans_ATCC_27988_02</i>      | Enterobacteriales | <i>Pantoea</i>     |
| <i>Paracoccus_yeei_RRLK05_01_01</i>           | Rhodobacterales   | <i>Paracoccus</i>  |
| <i>Paracoccus_yeei_RRLK05_01_02</i>           | Rhodobacterales   | <i>Paracoccus</i>  |
| <i>Paracoccus_yeei_RRLK05_01_03</i>           | Rhodobacterales   | <i>Paracoccus</i>  |
| <i>Paracoccus_yeei_RRLK05_01_04</i>           | Rhodobacterales   | <i>Paracoccus</i>  |
| <i>Proteus_inconstans_ATCC_25827_01</i>       | Enterobacteriales | <i>Proteus</i>     |
| <i>Proteus_inconstans_ATCC_25827_02</i>       | Enterobacteriales | <i>Proteus</i>     |
| <i>Proteus_mirabilis_SM_788_01</i>            | Enterobacteriales | <i>Proteus</i>     |
| <i>Proteus_mirabilis_SM_788_02</i>            | Enterobacteriales | <i>Proteus</i>     |
| <i>Proteus_morganii_DSM_30117_01</i>          | Enterobacteriales | <i>Proteus</i>     |
| <i>Proteus_morganii_DSM_30117_02</i>          | Enterobacteriales | <i>Proteus</i>     |
| <i>Proteus_vulgaris_ATCC_33420_01</i>         | Enterobacteriales | <i>Proteus</i>     |
| <i>Proteus_vulgaris_ATCC_33420_02</i>         | Enterobacteriales | <i>Proteus</i>     |
| <i>Pseudomonas_aeruginosa_ATCC_27853_01</i>   | Pseudomonadales   | <i>Pseudomonas</i> |
| <i>Pseudomonas_aeruginosa_ATCC_27853_02</i>   | Pseudomonadales   | <i>Pseudomonas</i> |
| <i>Pseudomonas_aeruginosa_ATCC_27853_03</i>   | Pseudomonadales   | <i>Pseudomonas</i> |
| <i>Pseudomonas_aeruginosa_ATCC_27853_04</i>   | Pseudomonadales   | <i>Pseudomonas</i> |
| <i>Pseudomonas_chlororaphis_ATCC_17809_01</i> | Pseudomonadales   | <i>Pseudomonas</i> |
| <i>Pseudomonas_chlororaphis_ATCC_17809_02</i> | Pseudomonadales   | <i>Pseudomonas</i> |
| <i>Pseudomonas_chlororaphis_ATCC_17809_03</i> | Pseudomonadales   | <i>Pseudomonas</i> |
| <i>Pseudomonas_chlororaphis_ATCC_17809_04</i> | Pseudomonadales   | <i>Pseudomonas</i> |
| <i>Ralstonia_insidiosa_DSM_17714_01</i>       | Burkholderiales   | <i>Ralstonia</i>   |



|                                                         |                   |                       |
|---------------------------------------------------------|-------------------|-----------------------|
| <i>Ralstonia_insidiosa_DSM_17714_02</i>                 | Burkholderiales   | <i>Ralstonia</i>      |
| <i>Ralstonia_insidiosa_DSM_17714_03</i>                 | Burkholderiales   | <i>Ralstonia</i>      |
| <i>Ralstonia_insidiosa_DSM_17714_04</i>                 | Burkholderiales   | <i>Ralstonia</i>      |
| <i>Ralstonia_mannitolilytica_DSM_17512_01</i>           | Burkholderiales   | <i>Ralstonia</i>      |
| <i>Ralstonia_mannitolilytica_DSM_17512_02</i>           | Burkholderiales   | <i>Ralstonia</i>      |
| <i>Ralstonia_mannitolilytica_DSM_17512_03</i>           | Burkholderiales   | <i>Ralstonia</i>      |
| <i>Ralstonia_mannitolilytica_DSM_17512_04</i>           | Burkholderiales   | <i>Ralstonia</i>      |
| <i>Ralstonia_pickettii_DSM_6297_01</i>                  | Burkholderiales   | <i>Ralstonia</i>      |
| <i>Ralstonia_pickettii_DSM_6297_02</i>                  | Burkholderiales   | <i>Ralstonia</i>      |
| <i>Ralstonia_pickettii_DSM_6297_03</i>                  | Burkholderiales   | <i>Ralstonia</i>      |
| <i>Ralstonia_pickettii_DSM_6297_04</i>                  | Burkholderiales   | <i>Ralstonia</i>      |
| <i>Salmonella_enterica_serovar_minnesota_SF_1111_01</i> | Enterobacteriales | <i>Salmonella</i>     |
| <i>Salmonella_enterica_serovar_minnesota_SF_1111_02</i> | Enterobacteriales | <i>Salmonella</i>     |
| <i>Salmonella_enteritidis_LT21_01</i>                   | Enterobacteriales | <i>Salmonella</i>     |
| <i>Salmonella_enteritidis_LT21_02</i>                   | Enterobacteriales | <i>Salmonella</i>     |
| <i>Salmonella_hadar_01</i>                              | Enterobacteriales | <i>Salmonella</i>     |
| <i>Salmonella_hadar_02</i>                              | Enterobacteriales | <i>Salmonella</i>     |
| <i>Salmonella_typhimurium_SH_9178_01</i>                | Enterobacteriales | <i>Salmonella</i>     |
| <i>Salmonella_typhimurium_SH_9178_02</i>                | Enterobacteriales | <i>Salmonella</i>     |
| <i>Serratia_grimesii_DSM_30063_01</i>                   | Enterobacteriales | <i>Salmonella</i>     |
| <i>Serratia_grimesii_DSM_30063_02</i>                   | Enterobacteriales | <i>Salmonella</i>     |
| <i>Serratia_marcescens_DSM_30121_01</i>                 | Enterobacteriales | <i>Salmonella</i>     |
| <i>Serratia_marcescens_DSM_30121_02</i>                 | Enterobacteriales | <i>Salmonella</i>     |
| <i>Shigella_boydii_01</i>                               | Enterobacteriales | <i>Salmonella</i>     |
| <i>Shigella_boydii_02</i>                               | Enterobacteriales | <i>Salmonella</i>     |
| <i>Shigella_flexneri_3A_01</i>                          | Enterobacteriales | <i>Salmonella</i>     |
| <i>Shigella_flexneri_3A_02</i>                          | Enterobacteriales | <i>Salmonella</i>     |
| <i>Staphylococcus_aureus_DSM_20231_01</i>               | Bacillales        | <i>Staphylococcus</i> |
| <i>Staphylococcus_aureus_DSM_20231_02</i>               | Bacillales        | <i>Staphylococcus</i> |
| <i>Staphylococcus_aureus_DSM_20231_03</i>               | Bacillales        | <i>Staphylococcus</i> |

|                                                 |                   |                         |
|-------------------------------------------------|-------------------|-------------------------|
| <i>Staphylococcus_aureus_DSM_20231_04</i>       | Bacillales        | <i>Staphylococcus</i>   |
| <i>Staphylococcus_epidermidis_DSM_1798_01</i>   | Bacillales        | <i>Staphylococcus</i>   |
| <i>Staphylococcus_epidermidis_DSM_1798_02</i>   | Bacillales        | <i>Staphylococcus</i>   |
| <i>Staphylococcus_epidermidis_DSM_1798_03</i>   | Bacillales        | <i>Staphylococcus</i>   |
| <i>Staphylococcus_epidermidis_DSM_1798_04</i>   | Bacillales        | <i>Staphylococcus</i>   |
| <i>Staphylococcus_hominis_RRLK01_03_01</i>      | Bacillales        | <i>Staphylococcus</i>   |
| <i>Staphylococcus_hominis_RRLK01_03_02</i>      | Bacillales        | <i>Staphylococcus</i>   |
| <i>Staphylococcus_hominis_RRLK01_03_03</i>      | Bacillales        | <i>Staphylococcus</i>   |
| <i>Staphylococcus_hominis_RRLK01_03_04</i>      | Bacillales        | <i>Staphylococcus</i>   |
| <i>Stenotrophomonas_maltophilia_Sm_36_01</i>    | Xanthomonadales   | <i>Stenotrophomonas</i> |
| <i>Stenotrophomonas_maltophilia_Sm_36_02</i>    | Xanthomonadales   | <i>Stenotrophomonas</i> |
| <i>Stenotrophomonas_maltophilia_Sm_36_03</i>    | Xanthomonadales   | <i>Stenotrophomonas</i> |
| <i>Stenotrophomonas_rhizophila_RRLK03_01_01</i> | Xanthomonadales   | <i>Stenotrophomonas</i> |
| <i>Stenotrophomonas_rhizophila_RRLK03_01_02</i> | Xanthomonadales   | <i>Stenotrophomonas</i> |
| <i>Stenotrophomonas_rhizophila_RRLK03_01_03</i> | Xanthomonadales   | <i>Stenotrophomonas</i> |
| <i>Stenotrophomonas_rhizophila_RRLK03_01_04</i> | Xanthomonadales   | <i>Stenotrophomonas</i> |
| <i>Streptococcus_pyogenes_DSM_20565_01</i>      | Lactobacillales   | <i>Streptococcus</i>    |
| <i>Streptococcus_pyogenes_DSM_20565_02</i>      | Lactobacillales   | <i>Streptococcus</i>    |
| <i>Streptococcus_pyogenes_DSM_20565_03</i>      | Lactobacillales   | <i>Streptococcus</i>    |
| <i>Streptococcus_pyogenes_DSM_20565_04</i>      | Lactobacillales   | <i>Streptococcus</i>    |
| <i>Vibrio_alginolyticus_DSM_2171_01</i>         | Enterobacteriales | <i>Vibrio</i>           |
| <i>Vibrio_cholerae_A220_01</i>                  | Enterobacteriales | <i>Vibrio</i>           |
| <i>Vibrio_cholerae_A220_02</i>                  | Enterobacteriales | <i>Vibrio</i>           |
| <i>Vibrio_cholerae_A220_03</i>                  | Enterobacteriales | <i>Vibrio</i>           |
| <i>Vibrio_cholerae_A220_04</i>                  | Enterobacteriales | <i>Vibrio</i>           |
| <i>Vibrio_diazotrophicus_174_2_01</i>           | Enterobacteriales | <i>Vibrio</i>           |
| <i>Vibrio_mimicus_A177_1_01</i>                 | Enterobacteriales | <i>Vibrio</i>           |
| <i>Vibrio_parahaemolyticus_177_2_01</i>         | Enterobacteriales | <i>Vibrio</i>           |
| <i>Vibrio_vulnificus_A177_3_02</i>              | Enterobacteriales | <i>Vibrio</i>           |
| <i>Xenophilus_sp_A395_01</i>                    | Burkholderiales   | <i>Xenophilus</i>       |

|                                            |                   |                   |
|--------------------------------------------|-------------------|-------------------|
| <i>Xenophilus_sp_A395_02</i>               | Burkholderiales   | <i>Xenophilus</i> |
| <i>Yersinia_aldovae_DSM_18303_01</i>       | Enterobacteriales | <i>Yersinia</i>   |
| <i>Yersinia_aldovae_DSM_18303_02</i>       | Enterobacteriales | <i>Yersinia</i>   |
| <i>Yersinia_aldovae_DSM_18303_03</i>       | Enterobacteriales | <i>Yersinia</i>   |
| <i>Yersinia_aleksiciae_DSM_14987_01</i>    | Enterobacteriales | <i>Yersinia</i>   |
| <i>Yersinia_aleksiciae_DSM_14987_02</i>    | Enterobacteriales | <i>Yersinia</i>   |
| <i>Yersinia_aleksiciae_DSM_14987_03</i>    | Enterobacteriales | <i>Yersinia</i>   |
| <i>Yersinia_bercovieri_DSM_18528_01</i>    | Enterobacteriales | <i>Yersinia</i>   |
| <i>Yersinia_bercovieri_DSM_18528_02</i>    | Enterobacteriales | <i>Yersinia</i>   |
| <i>Yersinia_bercovieri_DSM_18528_03</i>    | Enterobacteriales | <i>Yersinia</i>   |
| <i>Yersinia_enterocolitica_DSM_9676_01</i> | Enterobacteriales | <i>Yersinia</i>   |
| <i>Yersinia_enterocolitica_DSM_9676_02</i> | Enterobacteriales | <i>Yersinia</i>   |
| <i>Yersinia_enterocolitica_DSM_9676_03</i> | Enterobacteriales | <i>Yersinia</i>   |
| <i>Yersinia_entomophaga_DSM_22339_01</i>   | Enterobacteriales | <i>Yersinia</i>   |
| <i>Yersinia_entomophaga_DSM_22339_02</i>   | Enterobacteriales | <i>Yersinia</i>   |
| <i>Yersinia_entomophaga_DSM_22339_03</i>   | Enterobacteriales | <i>Yersinia</i>   |
| <i>Yersinia_entomophaga_DSM_22339_04</i>   | Enterobacteriales | <i>Yersinia</i>   |
| <i>Yersinia_frederiksenii_DSM_18490_01</i> | Enterobacteriales | <i>Yersinia</i>   |
| <i>Yersinia_frederiksenii_DSM_18490_02</i> | Enterobacteriales | <i>Yersinia</i>   |
| <i>Yersinia_frederiksenii_DSM_18490_03</i> | Enterobacteriales | <i>Yersinia</i>   |
| <i>Yersinia_intermedia_DSM_18517_01</i>    | Enterobacteriales | <i>Yersinia</i>   |
| <i>Yersinia_intermedia_DSM_18517_02</i>    | Enterobacteriales | <i>Yersinia</i>   |
| <i>Yersinia_intermedia_DSM_18517_03</i>    | Enterobacteriales | <i>Yersinia</i>   |
| <i>Yersinia_kristensenii_DSM_18543_01</i>  | Enterobacteriales | <i>Yersinia</i>   |
| <i>Yersinia_kristensenii_DSM_18543_02</i>  | Enterobacteriales | <i>Yersinia</i>   |
| <i>Yersinia_kristensenii_DSM_18543_03</i>  | Enterobacteriales | <i>Yersinia</i>   |
| <i>Yersinia_massiliensis_DSM_21859_01</i>  | Enterobacteriales | <i>Yersinia</i>   |
| <i>Yersinia_massiliensis_DSM_21859_02</i>  | Enterobacteriales | <i>Yersinia</i>   |
| <i>Yersinia_massiliensis_DSM_21859_03</i>  | Enterobacteriales | <i>Yersinia</i>   |
| <i>Yersinia_massiliensis_DSM_21859_04</i>  | Enterobacteriales | <i>Yersinia</i>   |

|                                                |                  |                 |
|------------------------------------------------|------------------|-----------------|
| <i>Yersinia_mollaretii_DSM_18520_01</i>        | Enterobacterales | <i>Yersinia</i> |
| <i>Yersinia_mollaretii_DSM_18520_02</i>        | Enterobacterales | <i>Yersinia</i> |
| <i>Yersinia_mollaretii_DSM_18520_03</i>        | Enterobacterales | <i>Yersinia</i> |
| <i>Yersinia_nurmii_DSM_22296_01</i>            | Enterobacterales | <i>Yersinia</i> |
| <i>Yersinia_nurmii_DSM_22296_02</i>            | Enterobacterales | <i>Yersinia</i> |
| <i>Yersinia_nurmii_DSM_22296_03</i>            | Enterobacterales | <i>Yersinia</i> |
| <i>Yersinia_nurmii_DSM_22296_04</i>            | Enterobacterales | <i>Yersinia</i> |
| <i>Yersinia_pekkanenii_DSM_22769_01</i>        | Enterobacterales | <i>Yersinia</i> |
| <i>Yersinia_pekkanenii_DSM_22769_02</i>        | Enterobacterales | <i>Yersinia</i> |
| <i>Yersinia_pekkanenii_DSM_22769_03</i>        | Enterobacterales | <i>Yersinia</i> |
| <i>Yersinia_pekkanenii_DSM_22769_04</i>        | Enterobacterales | <i>Yersinia</i> |
| <i>Yersinia_pestis_10329_01</i>                | Enterobacterales | <i>Yersinia</i> |
| <i>Yersinia_pestis_10329_04</i>                | Enterobacterales | <i>Yersinia</i> |
| <i>Yersinia_pseudotuberculosis_DSM_8992_01</i> | Enterobacterales | <i>Yersinia</i> |
| <i>Yersinia_pseudotuberculosis_DSM_8992_02</i> | Enterobacterales | <i>Yersinia</i> |
| <i>Yersinia_pseudotuberculosis_DSM_8992_03</i> | Enterobacterales | <i>Yersinia</i> |
| <i>Yersinia_rohdei_DSM_18270_01</i>            | Enterobacterales | <i>Yersinia</i> |
| <i>Yersinia_rohdei_DSM_18270_02</i>            | Enterobacterales | <i>Yersinia</i> |
| <i>Yersinia_rohdei_DSM_18270_03</i>            | Enterobacterales | <i>Yersinia</i> |
| <i>Yersinia_ruckeri_DSM_18506_01</i>           | Enterobacterales | <i>Yersinia</i> |
| <i>Yersinia_ruckeri_DSM_18506_02</i>           | Enterobacterales | <i>Yersinia</i> |
| <i>Yersinia_ruckeri_DSM_18506_03</i>           | Enterobacterales | <i>Yersinia</i> |
| <i>Yersinia_similis_DSM_18211_01</i>           | Enterobacterales | <i>Yersinia</i> |
| <i>Yersinia_similis_DSM_18211_02</i>           | Enterobacterales | <i>Yersinia</i> |
| <i>Yersinia_similis_DSM_18211_03</i>           | Enterobacterales | <i>Yersinia</i> |
| <i>Yersinia_similis_DSM_18211_04</i>           | Enterobacterales | <i>Yersinia</i> |
| <i>Yersinia_wautersii_DSM_27350_01</i>         | Enterobacterales | <i>Yersinia</i> |
| <i>Yersinia_wautersii_DSM_27350_02</i>         | Enterobacterales | <i>Yersinia</i> |
| <i>Yersinia_wautersii_DSM_27350_03</i>         | Enterobacterales | <i>Yersinia</i> |
| <i>Yersinia_wautersii_DSM_27350_04</i>         | Enterobacterales | <i>Yersinia</i> |

TABLE S2. SUMMARY TABLE OF STUDIED BACTERIAL STRAINS (BSNB)

| <b>Names</b>                        | <b>ID</b> | <b>BSNB</b> | <b>Order</b>      | <b>Genus</b>          |
|-------------------------------------|-----------|-------------|-------------------|-----------------------|
| <i>Bacillus_cereus</i>              | GTC2112   | BSNB_0016   | Bacillales        | <i>Bacillus</i>       |
| <i>Brevibacillus_sp</i>             | GCYPB01   | BSNB_0034   | Bacillales        | <i>Brevibacillus</i>  |
| <i>Bacillus_sp</i>                  | GTC2802   | BSNB_0053   | Bacillales        | <i>Bacillus</i>       |
| <i>Serratia_sp</i>                  | CN1       | BSNB_0139   | Enterobacteriales | <i>Serratia</i>       |
| <i>Serratia_marcescens</i>          | CN4       | BSNB_0142   | Enterobacteriales | <i>Serratia</i>       |
| <i>Burkholderia_seminalis</i>       | CN5A      | BSNB_0143   | Burkholderiales   | <i>Burkholderia</i>   |
| <i>Pseudomonas_beteli</i>           | CN12      | BSNB_0150   | Pseudomonadales   | <i>Pseudomonas</i>    |
| <i>Serratia_marcescens</i>          | CN14      | BSNB_0152   | Enterobacteriales | <i>Serratia</i>       |
| <i>Achromobacter_sp</i>             | CN15      | BSNB_0153   | Burkholderiales   | <i>Achromobacter</i>  |
| <i>Burkholderia_sp</i>              | CN20      | BSNB_0158   | Burkholderiales   | <i>Burkholderia</i>   |
| <i>Serratia_marcescens</i>          | CN27      | BSNB_0165   | Enterobacteriales | <i>Serratia</i>       |
| <i>Burkholderia_sp</i>              | CN28      | BSNB_0166   | Burkholderiales   | <i>Burkholderia</i>   |
| <i>Burkholderia_pyrrocinia</i>      | CN32      | BSNB_0170   | Burkholderiales   | <i>Burkholderia</i>   |
| <i>Burkholderia_sp</i>              | CN33      | BSNB_0171   | Burkholderiales   | <i>Burkholderia</i>   |
| <i>Burkholderia_cepacia</i>         | CN34      | BSNB_0172   | Burkholderiales   | <i>Burkholderia</i>   |
| <i>Burkholderia_sp</i>              | CN38      | BSNB_0178   | Burkholderiales   | <i>Burkholderia</i>   |
| <i>Lactococcus_garvieae</i>         | CN39      | BSNB_0179   | Lactobacillales   | <i>Lactococcus</i>    |
| <i>Lactococcus_garvieae</i>         | CN40      | BSNB_0180   | Lactobacillales   | <i>Lactococcus</i>    |
| <i>Burkholderia_arboris</i>         | CN41      | BSNB_0181   | Burkholderiales   | <i>Burkholderia</i>   |
| <i>Enterobacter_tabaci</i>          | CN42A     | BSNB_0182   | Enterobacteriales | <i>Enterobacter</i>   |
| <i>Enterobacter_tabaci</i>          | CN51      | BSNB_0191   | Enterobacteriales | <i>Enterobacter</i>   |
| <i>Enterobacter_tabaci</i>          | CN52      | BSNB_0192   | Enterobacteriales | <i>Enterobacter</i>   |
| <i>Pseudomonas_sp</i>               | CN54      | BSNB_0194   | Pseudomonadales   | <i>Pseudomonas</i>    |
| <i>Kitasatospora_sp</i>             | CN61      | BSNB_0202   | Actinomycetales   | <i>Kitasatospora</i>  |
| <i>Bacillus_cereus</i>              | CN89      | BSNB_0230   | Bacillales        | <i>Bacillus</i>       |
| <i>Bacillus_cereus</i>              | CN91      | BSNB_0232   | Bacillales        | <i>Bacillus</i>       |
| <i>Lysinibacillus_xylanilyticus</i> | CN92      | BSNB_0233   | Bacillales        | <i>Lysinibacillus</i> |
| <i>Streptomyces_sp</i>              | CN93      | BSNB_0234   | Actinomycetales   | <i>Streptomyces</i>   |

|                                     |            |           |                   |                         |
|-------------------------------------|------------|-----------|-------------------|-------------------------|
| <i>Bacillus_firmus</i>              | CN94       | BSNB_0235 | Bacillales        | <i>Bacillus</i>         |
| <i>Bacillus_sp</i>                  | CN95       | BSNB_0236 | Bacillales        | <i>Bacillus</i>         |
| <i>Lysinibacillus_sp</i>            | CN98       | BSNB_0239 | Bacillales        | <i>Lysinibacillus</i>   |
| <i>Enterobacter_tabaci</i>          | CN99       | BSNB_0240 | Enterobacteriales | <i>Enterobacter</i>     |
| <i>Serratia_marcescens</i>          | CN101      | BSNB_0242 | Enterobacteriales | <i>Serratia</i>         |
| <i>Lysinibacillus_xylanilyticus</i> | CN104      | BSNB_0245 | Bacillales        | <i>Lysinibacillus</i>   |
| <i>Burkholderia_sp</i>              | CN105      | BSNB_0246 | Burkholderiales   | <i>Burkholderia</i>     |
| <i>Streptomyces_malaysiense</i>     | CN115      | BSNB_0256 | Actinomycetales   | <i>Streptomyces</i>     |
| <i>Paraburkholderia_tropica</i>     | A1F1 2     | BSNB_0493 | Burkholderiales   | <i>Paraburkholderia</i> |
| <i>Klebsiella_michiganensis</i>     | A1F1 3     | BSNB_0494 | Enterobacteriales | <i>Klebsiella</i>       |
| <i>Enterobacter_asburiae</i>        | A2F_1 1.1  | BSNB_0517 | Enterobacteriales | <i>Enterobacter</i>     |
| <i>Burkholderia_tropica</i>         | A2F_1 3    | BSNB_0519 | Burkholderiales   | <i>Burkholderia</i>     |
| <i>Burkholderia_sp</i>              | A2F_1 5.2  | BSNB_0521 | Burkholderiales   | <i>Burkholderia</i>     |
| <i>Burkholderia_tropica</i>         | A2F11 4    | BSNB_0547 | Burkholderiales   | <i>Burkholderia</i>     |
| <i>Bacillus_thuringiensis</i>       | A3F_1 2    | BSNB_0561 | Bacillales        | <i>Bacillus</i>         |
| <i>Paraburkholderia_tropica_</i>    | A3F_1 3    | BSNB_0562 | Burkholderiales   | <i>Paraburkholderia</i> |
| <i>Paraburkholderia_tropica_</i>    | A3F_1 6    | BSNB_0565 | Burkholderiales   | <i>Paraburkholderia</i> |
| <i>Bacillus_subtilis</i>            | A3F1 1     | BSNB_0566 | Bacillales        | <i>Bacillus</i>         |
| <i>Bacillus_subtilis</i>            | A3F1 8.2   | BSNB_0567 | Bacillales        | <i>Bacillus</i>         |
| <i>Bacillus_subtilis</i>            | A3F1 3     | BSNB_0568 | Bacillales        | <i>Bacillus</i>         |
| <i>Pantoea_dispersa</i>             | A3F1 4.1   | BSNB_0569 | Enterobacteriales | <i>Pantoea</i>          |
| <i>Burkholderia_tropica</i>         | A3F1 5     | BSNB_0570 | Burkholderiales   | <i>Burkholderia</i>     |
| <i>Burkholderia_tropica</i>         | A3F1 7     | BSNB_0572 | Burkholderiales   | <i>Burkholderia</i>     |
| <i>Bacillus_subtilis</i>            | A3F1 8.111 | BSNB_0573 | Bacillales        | <i>Bacillus</i>         |
| <i>Bacillus_subtilis</i>            | A3F1 2     | BSNB_0576 | Bacillales        | <i>Bacillus</i>         |
| <i>Klebsiella_variicola</i>         | A4F1 1     | BSNB_0591 | Enterobacteriales | <i>Klebsiella</i>       |
| <i>Klebsiella_variicola</i>         | A4F1 2     | BSNB_0592 | Enterobacteriales | <i>Klebsiella</i>       |
| <i>Burkholderia_tropica</i>         | A4F1 3     | BSNB_0593 | Burkholderiales   | <i>Burkholderia</i>     |
| <i>Klebsiella_variicola</i>         | A4F1 4     | BSNB_0594 | Enterobacteriales | <i>Klebsiella</i>       |
| <i>Klebsiella_variicola</i>         | A4F1 5     | BSNB_0595 | Enterobacteriales | <i>Klebsiella</i>       |

|                                      |           |           |                   |                         |
|--------------------------------------|-----------|-----------|-------------------|-------------------------|
| <i>Burkholderia_plantarum</i>        | A4F1 6    | BSNB_0596 | Burkholderiales   | <i>Burkholderia</i>     |
| <i>Burkholderia_plantarum</i>        | A4F1 7    | BSNB_0597 | Burkholderiales   | <i>Burkholderia</i>     |
| <i>Klebsiella_variicola</i>          | A4F1 9    | BSNB_0598 | Enterobacteriales | <i>Klebsiella</i>       |
| <i>Burkholderia_sp</i>               | A5F_1 2   | BSNB_0616 | Burkholderiales   | <i>Burkholderia</i>     |
| <i>Burkholderia_arvi</i>             | A5F_1 4   | BSNB_0617 | Burkholderiales   | <i>Burkholderia</i>     |
| <i>Bacillus_cereus</i>               | A5F_1 6   | BSNB_0618 | Bacillales        | <i>Bacillus</i>         |
| <i>Burkholderia_sp</i>               | A5F_1 3   | BSNB_0619 | Burkholderiales   | <i>Burkholderia</i>     |
| <i>Burkholderia_tropica</i>          | A5F1 8    | BSNB_0626 | Burkholderiales   | <i>Burkholderia</i>     |
| <i>Burkholderia_tropica</i>          | A5F10 2   | BSNB_0630 | Burkholderiales   | <i>Burkholderia</i>     |
| <i>Burkholderia_tropica</i>          | A5F10 4   | BSNB_0632 | Burkholderiales   | <i>Burkholderia</i>     |
| <i>Paraburkholderia_guayanaensis</i> | A5F10 7   | BSNB_0635 | Burkholderiales   | <i>Paraburkholderia</i> |
| <i>Burkholderia_sp</i>               | A5F10 8   | BSNB_0636 | Burkholderiales   | <i>Burkholderia</i>     |
| <i>Burkholderia_tropica</i>          | A5F10 11  | BSNB_0639 | Burkholderiales   | <i>Burkholderia</i>     |
| <i>Burkholderia_oxypila</i>          | A5F10 12  | BSNB_0640 | Burkholderiales   | <i>Burkholderia</i>     |
| <i>Paenibacillus_glucanolyticus</i>  | A6F_1 1   | BSNB_0643 | Bacillales        | <i>Paenibacillus</i>    |
| <i>Bacillus_sp</i>                   | A6F1 4    | BSNB_0648 | Bacillales        | <i>Bacillus</i>         |
| <i>Burkholderia_tropica</i>          | A6F16 4   | BSNB_0656 | Burkholderiales   | <i>Burkholderia</i>     |
| <i>Burkholderia_tropica</i>          | A6F16 6   | BSNB_0658 | Burkholderiales   | <i>Burkholderia</i>     |
| <i>Bacillus_subtilis</i>             | A6F16 7.1 | BSNB_0659 | Bacillales        | <i>Bacillus</i>         |
| <i>Burkholderia_tropica</i>          | A6F16 8   | BSNB_0661 | Burkholderiales   | <i>Burkholderia</i>     |
| <i>Burkholderia_tropica</i>          | A6F16 10  | BSNB_0663 | Burkholderiales   | <i>Burkholderia</i>     |
| <i>Enterobacter_amnigenus</i>        | A7F_1 1   | BSNB_0669 | Enterobacteriales | <i>Enterobacter</i>     |
| <i>Pantoea_stewartii</i>             | A7F_1 3   | BSNB_0671 | Enterobacteriales | <i>Pantoea</i>          |
| <i>Pantoea_stewartii</i>             | A7F_1 4   | BSNB_0672 | Enterobacteriales | <i>Pantoea</i>          |
| <i>Enterobacter_mori</i>             | A7F_1 7   | BSNB_0675 | Enterobacteriales | <i>Enterobacter</i>     |
| <i>Bacillus_subtilis</i>             | A7F1 5.1  | BSNB_0683 | Bacillales        | <i>Bacillus</i>         |
| <i>Bacillus_subtilis</i>             | A7F1 8    | BSNB_0685 | Bacillales        | <i>Bacillus</i>         |
| <i>Stenotrophomonas_maltophilia</i>  | A8F_1 1   | BSNB_0704 | Xanthomonadales   | <i>Stenotrophomonas</i> |
| <i>Enterobacter_mori</i>             | A8F_1 3   | BSNB_0706 | Enterobacteriales | <i>Enterobacter</i>     |
| <i>Enterobacter_mori</i>             | A8F_1 5.1 | BSNB_0708 | Enterobacteriales | <i>Enterobacter</i>     |

|                                      |                   |           |                   |                         |
|--------------------------------------|-------------------|-----------|-------------------|-------------------------|
| <i>Enterobacter_mori</i>             | A8F_1 6.1         | BSNB_0709 | Enterobacteriales | <i>Enterobacter</i>     |
| <i>Bacillus_subtilis</i>             | A8F_1 8           | BSNB_0712 | Bacillales        | <i>Bacillus</i>         |
| <i>Bacillus_subtilis</i>             | A8F1 1            | BSNB_0716 | Bacillales        | <i>Bacillus</i>         |
| <i>Luteibacter_yeojuensis</i>        | A8F1 6.1          | BSNB_0719 | Xanthomonadales   | <i>Luteibacter</i>      |
| <i>Luteibacter_yeojuensis</i>        | A8F1 7            | BSNB_0721 | Xanthomonadales   | <i>Luteibacter</i>      |
| <i>Bacillus_subtilis</i>             | A8F1 8            | BSNB_0722 | Bacillales        | <i>Bacillus</i>         |
| <i>Enterobacter_mori</i>             | A8F11 1           | BSNB_0723 | Enterobacteriales | <i>Enterobacter</i>     |
| <i>Enterobacter_mori</i>             | A8F11 3           | BSNB_0725 | Enterobacteriales | <i>Enterobacter</i>     |
| <i>Enterobacter_mori</i>             | A8F11 4           | BSNB_0726 | Enterobacteriales | <i>Enterobacter</i>     |
| <i>Enterobacter_mori</i>             | A8F11 5           | BSNB_0727 | Enterobacteriales | <i>Enterobacter</i>     |
| <i>Bacillus_subtilis</i>             | A8F11 8           | BSNB_0730 | Bacillales        | <i>Bacillus</i>         |
| <i>Bacillus_subtilis</i>             | C1F9 10           | BSNB_0762 | Bacillales        | <i>Bacillus</i>         |
| <i>Bacillus_subtilis</i>             | P1F1 1            | BSNB_0803 | Bacillales        | <i>Bacillus</i>         |
| <i>Bacillus_subtilis</i>             | P1F1 2            | BSNB_0804 | Bacillales        | <i>Bacillus</i>         |
| <i>Methylobacterium_mesophilicum</i> | P1F1 3            | BSNB_0805 | Rhizobiales       | <i>Methylobacterium</i> |
| <i>Bacillus_subtilis</i>             | P1F5 8            | BSNB_0816 | Bacillales        | <i>Bacillus</i>         |
| <i>Bacillus_subtilis</i>             | P1F5 9            | BSNB_0817 | Bacillales        | <i>Bacillus</i>         |
| <i>Bacillus_subtilis</i>             | W2F_2 1           | BSNB_0955 | Bacillales        | <i>Bacillus</i>         |
| <i>Bacillus_subtilis</i>             | W2F_2 3           | BSNB_0956 | Bacillales        | <i>Bacillus</i>         |
| <i>Bacillus_subtilis</i>             | W2F_2 9           | BSNB_0959 | Bacillales        | <i>Bacillus</i>         |
| <i>Acidisoma_sp</i>                  | W3F_3 8           | BSNB_0978 | Rhodospirillales  | <i>Acidosoma</i>        |
| <i>Burkholderia_tropica</i>          | AC A2 F11<br>9.1B | BSNB_1020 | Burkholderiales   | <i>Burkholderia</i>     |
| <i>Methylobacterium_populi</i>       | VECD13D           | BSNB_1022 | Rhizobiales       | <i>Methylobacterium</i> |
| <i>Curtobacterium_sp</i>             | VECD14A           | BSNB_1023 | Actinomycetales   | <i>Curtobacterium</i>   |
| <i>Pantoea_dispersa</i>              | VECD14B           | BSNB_1024 | Enterobacteriales | <i>Pantoea</i>          |
| <i>Bacillus_megaterium</i>           | VECD14C           | BSNB_1025 | Bacillales        | <i>Bacillus</i>         |
| <i>Methylobacterium_sp</i>           | VECD14G           | BSNB_1026 | Rhizobiales       | <i>Methylobacterium</i> |
| <i>Asaia_sp</i>                      | VECD15A           | BSNB_1027 | Rhodospirillales  | <i>Asaia</i>            |
| <i>Pseudomonas_sp</i>                | ST5C              | BSNB_1030 | Pseudomonadales   | <i>Pseudomonas</i>      |



|                                      |          |           |                   |                         |
|--------------------------------------|----------|-----------|-------------------|-------------------------|
| <i>Arthrobacter_sp</i>               | ST8C     | BSNB_1032 | Actinomycetales   | <i>Arthrobacter</i>     |
| <i>Pantoea_agglomerans</i>           | ST16C    | BSNB_1034 | Enterobacteriales | <i>Pantoea</i>          |
| <i>Methylobacterium_mesophilicum</i> | LR_FP43  | BSNB_1116 | Rhizobiales       | <i>Methylobacterium</i> |
| <i>Methylobacterium_mesophilicum</i> | LR_FP51  | BSNB_1123 | Rhizobiales       | <i>Methylobacterium</i> |
| <i>Methylobacterium_mesophilicum</i> | LR_FP67  | BSNB_1136 | Rhizobiales       | <i>Methylobacterium</i> |
| <i>Methylobacterium_mesophilicum</i> | LR_FP68  | BSNB_1137 | Rhizobiales       | <i>Methylobacterium</i> |
| <i>Methylobacterium_mesophilicum</i> | LR_FP74  | BSNB_1141 | Rhizobiales       | <i>Methylobacterium</i> |
| <i>Rhodococcus_kroppenstedtii</i>    | LR_FP135 | BSNB_1179 | Actinomycetales   | <i>Rhodococcus</i>      |
| <i>Rhodococcus_kroppenstedtii</i>    | LR_FP150 | BSNB_1190 | Actinomycetales   | <i>Rhodococcus</i>      |
| <i>Microbacterium_testaceum</i>      | LR_FP151 | BSNB_1191 | Actinomycetales   | <i>Microbacterium</i>   |
| <i>Microbacterium_testaceum</i>      | LR_FP152 | BSNB_1192 | Actinomycetales   | <i>Microbacterium</i>   |
| <i>Bacillus_subtilis</i>             | LR_FP171 | BSNB_1207 | Bacillales        | <i>Bacillus</i>         |
| <i>Bacillus_subtilis</i>             | LR_FP172 | BSNB_1208 | Bacillales        | <i>Bacillus</i>         |
| <i>Bacillus_subtilis</i>             | LR_FP174 | BSNB_1209 | Bacillales        | <i>Bacillus</i>         |
| <i>Bacillus_subtilis</i>             | LR_FP175 | BSNB_1210 | Bacillales        | <i>Bacillus</i>         |
| <i>Rhodococcus_cerastii</i>          | LR_EL13  | BSNB_1220 | Actinomycetales   | <i>Rhodococcus</i>      |
| <i>Bacillus_subtilis</i>             | LR_EL109 | BSNB_1238 | Bacillales        | <i>Bacillus</i>         |
| <i>Rhodococcus_cerastii</i>          | LR_EL133 | BSNB_1246 | Actinomycetales   | <i>Rhodococcus</i>      |
| <i>Klebsiella_michiganensis</i>      | A1F2A1   | NO_BSNB   | Enterobacteriales | <i>Klebsiella</i>       |
| <i>Klebsiella_michiganensis</i>      | A4F1_12  | NO_BSNB   | Enterobacteriales | <i>Klebsiella</i>       |
| <i>Methylobacterium_mesophilicum</i> | LRFP_069 | NO_BSNB   | Rhizobiales       | <i>Methylobacterium</i> |

TABLE S3. SUMMARY TABLE OF STUDIED FUNGAL STRAINS (BSNB)

| <b>Names</b>                          | <b>ID</b> | <b>BSNB</b> | <b>Order</b>     | <b>Genus</b>           |
|---------------------------------------|-----------|-------------|------------------|------------------------|
| <i>Epicoccum_nigrum</i>               | GTG01     | BSNB_0001   | Pleosporales     | <i>Epicoccum</i>       |
| <i>Colletotrichum_gloeosporioides</i> | GTC2001   | BSNB_0002   | Glomerellales    | <i>Colletotrichum</i>  |
| <i>Pestalotiopsis_sp</i>              | GTC2102   | BSNB_0006   | Xylariales       | <i>Pestalotiopsis</i>  |
| <i>Pestalotiopsis_sp</i>              | GTC2104   | BSNB_0008   | Xylariales       | <i>Pestalotiopsis</i>  |
| <i>Chaetomium_globosum</i>            | GTC2114   | BSNB_0018   | Sordariales      | <i>Chaetomium</i>      |
| <i>Diaporthe_phaseolorum</i>          | GTC2201   | BSNB_0020   | Diaporthales     | <i>Diaporthe</i>       |
| <i>Xylaria_cubensis</i>               | GPP02     | BSNB_0022   | Xylariales       | <i>Xylaria</i>         |
| <i>Mycoleptodiscus_sp</i>             | GTC2304   | BSNB_0024   | Magnaporthales   | <i>Mycoleptodiscus</i> |
| <i>Colletotrichum_siamense</i>        | GTC2303   | BSNB_0025   | Glomerellales    | <i>Colletotrichum</i>  |
| <i>Mycoleptodiscus_sp</i>             | GTC2304   | BSNB_0026   | Magnaporthales   | <i>Mycoleptodiscus</i> |
| <i>Colletotrichum_gloeosporioides</i> | GTC2401   | BSNB_0029   | Glomerellales    | <i>Colletotrichum</i>  |
| <i>Colletotrichum_boninense</i>       | GTC2502   | BSNB_0032   | Glomerellales    | <i>Colletotrichum</i>  |
| <i>Diaporthe_phaseolorum</i>          | GTC2503   | BSNB_0033   | Diaporthales     | <i>Diaporthe</i>       |
| <i>Colletotrichum_boninense</i>       | GTC2601   | BSNB_0035   | Glomerellales    | <i>Colletotrichum</i>  |
| <i>Xylaria_cubensis</i>               | GTC2604   | BSNB_0038   | Xylariales       | <i>Xylaria</i>         |
| <i>Colletotrichum_gloeosporioides</i> | GTC2605   | BSNB_0039   | Glomerellales    | <i>Colletotrichum</i>  |
| <i>Xylaria_sp</i>                     | GTC2702   | BSNB_0041   | Xylariales       | <i>Xylaria</i>         |
| <i>Guignardia_mangiferae</i>          | GTC2703   | BSNB_0042   | Botryosphaerales | <i>Guignardia</i>      |
| <i>Pestalotiopsis_sp</i>              | GTC2704   | BSNB_0043   | Xylariales       | <i>Pestalotiopsis</i>  |
| <i>Diaporthe_sp</i>                   | GTC2705   | BSNB_0044   | Diaporthales     | <i>Diaporthe</i>       |
| <i>Diaporthe_sp</i>                   | GTC2708   | BSNB_0047   | Diaporthales     | <i>Diaporthe</i>       |
| <i>Xylariales_sp</i>                  | GTC2709   | BSNB_0048   | Xylariales       | <i>Xylaria</i>         |
| <i>Xylariales_sp</i>                  | GTC2711   | BSNB_0050   | Xylariales       | <i>Xylaria</i>         |
| <i>Penicillium_sp</i>                 | GVL02     | BSNB_0051   | Eurotiales       | <i>Penicillium</i>     |
| <i>Phomopsis_sp</i>                   | GTC2801   | BSNB_0052   | Diaporthales     | <i>Phomopsis</i>       |
| <i>Phomopsis_phyllanthicola</i>       | GTC2804   | BSNB_0055   | Diaporthales     | <i>Phomopsis</i>       |
| <i>Xylaria_cubensis</i>               | GTC2805   | BSNB_0056   | Xylariales       | <i>Xylaria</i>         |
| <i>Phomopsis_sp</i>                   | GTC2806   | BSNB_0057   | Diaporthales     | <i>Phomopsis</i>       |

|                                       |         |           |                   |                       |
|---------------------------------------|---------|-----------|-------------------|-----------------------|
| <i>Diaporthe_phaseolorum</i>          | GTC2808 | BSNB_0059 | Diaporthales      | <i>Diaporthe</i>      |
| <i>Diaporthe_phaseolorum</i>          | GTC2809 | BSNB_0060 | Diaporthales      | <i>Diaporthe</i>      |
| <i>Phomopsis_sp</i>                   | GTC2812 | BSNB_0063 | Diaporthales      | <i>Phomopsis</i>      |
| <i>Phomopsis_sp</i>                   | GTC2820 | BSNB_0071 | Diaporthales      | <i>Phomopsis</i>      |
| <i>Chaetomium_sp</i>                  | GTC2901 | BSNB_0074 | Sordariales       | <i>Chaetomium</i>     |
| <i>Xylaria_sp</i>                     | GTC2902 | BSNB_0075 | Xylariales        | <i>Xylaria</i>        |
| <i>Acremonium_sp</i>                  | GTC2903 | BSNB_0076 | Hypocreales       | <i>Acremonium</i>     |
| <i>Pestalotiopsis_microspora</i>      | GTC2904 | BSNB_0077 | Xylariales        | <i>Pestalotiopsis</i> |
| <i>Chaetomium_sp</i>                  | GTC2905 | BSNB_0078 | Sordariales       | <i>Chaetomium</i>     |
| <i>Colletotrichum_gloeosporioides</i> | GTC3003 | BSNB_0085 | Glomerellales     | <i>Colletotrichum</i> |
| <i>Guignardia_mangiferae</i>          | GSS01   | BSNB_0087 | Botryosphaeriales | <i>Guignardia</i>     |
| <i>Xylaria_cubensis</i>               | GSS02   | BSNB_0088 | Xylariales        | <i>Xylaria</i>        |
| <i>Xylaria_cubensis</i>               | GSS04   | BSNB_0089 | Xylariales        | <i>Xylaria</i>        |
| <i>Xylaria_cubensis</i>               | GSS05   | BSNB_0090 | Xylariales        | <i>Xylaria</i>        |
| <i>Xylaria_cubensis</i>               | GSS06   | BSNB_0091 | Xylariales        | <i>Xylaria</i>        |
| <i>Colletotrichum_sp</i>              | GSS08   | BSNB_0093 | Glomerellales     | <i>Colletotrichum</i> |
| <i>Diaporthe_phaseolorum</i>          | GSS09   | BSNB_0094 | Diaporthales      | <i>Diaporthe</i>      |
| <i>Diaporthe_sp</i>                   | GSS11   | BSNB_0096 | Diaporthales      | <i>Diaporthe</i>      |
| <i>Colletotrichum_sp</i>              | GSS13   | BSNB_0098 | Glomerellales     | <i>Colletotrichum</i> |
| <i>Diaporthe_sp</i>                   | GSS15   | BSNB_0100 | Diaporthales      | <i>Diaporthe</i>      |
| <i>Pestalotiopsis_sp</i>              | GCI01   | BSNB_0102 | Xylariales        | <i>Pestalotiopsis</i> |
| <i>Xylaria_cubensis</i>               | GCI02   | BSNB_0103 | Xylariales        | <i>Xylaria</i>        |
| <i>Xylaria_cubensis</i>               | LD1.6   | BSNB_0106 | Xylariales        | <i>Xylaria</i>        |
| <i>Muscodor_sp</i>                    | LD1.5   | BSNB_0107 | Xylariales        | <i>Muscodor</i>       |
| <i>Guignardia_mangiferae</i>          | LD2.13  | BSNB_0115 | Botryosphaeriales | <i>Guignardia</i>     |
| <i>Colletotrichum_gloeosporioides</i> | LD3.4   | BSNB_0118 | Glomerellales     | <i>Colletotrichum</i> |
| <i>Xylaria_cubensis</i>               | LD3.6.2 | BSNB_0121 | Xylariales        | <i>Xylaria</i>        |
| <i>Cystobasidium_minutum</i>          | LR01    | BSNB_0122 | Saccharomycetales | <i>Cystobasidium</i>  |
| <i>Xylaria_sp</i>                     | LD4.11  | BSNB_0123 | Xylariales        | <i>Xylaria</i>        |
| <i>Colletotrichum_sp</i>              | LD4.3.2 | BSNB_0124 | Glomerellales     | <i>Colletotrichum</i> |

|                                       |         |           |                   |                         |
|---------------------------------------|---------|-----------|-------------------|-------------------------|
| <i>Candida_etchellsii</i>             | LD5.7   | BSNB_0125 | Saccharomycetales | <i>Candida</i>          |
| <i>Colletotrichum_gloeosporioides</i> | LD8.10  | BSNB_0132 | Glomerellales     | <i>Colletotrichum</i>   |
| <i>Colletotrichum_gloeosporioides</i> | LD8.6   | BSNB_0133 | Glomerellales     | <i>Colletotrichum</i>   |
| <i>Guignardia_mangiferae</i>          | LD8.9   | BSNB_0135 | Botryosphaeriales | <i>Guignardia</i>       |
| <i>Rhizomucor_variabilis</i>          | CN16    | BSNB_0154 | Mucorales         | <i>Rhizomucor</i>       |
| <i>Rhizomucor_variabilis</i>          | CN17    | BSNB_0155 | Mucorales         | <i>Rhizomucor</i>       |
| <i>Penicillium_shearrii</i>           | CN29    | BSNB_0167 | Eurotiales        | <i>Penicillium</i>      |
| <i>Penicillium_simplicissimum</i>     | CN30    | BSNB_0168 | Eurotiales        | <i>Penicillium</i>      |
| <i>Candida_tropicalis</i>             | CN36A   | BSNB_0174 | Saccharomycetales | <i>Candida</i>          |
| <i>Rhizomucor_variabilis</i>          | CN36B   | BSNB_0175 | Mucorales         | <i>Rhizomucor</i>       |
| <i>Rhizomucor_variabilis</i>          | CN37B   | BSNB_0177 | Mucorales         | <i>Rhizomucor</i>       |
| <i>Cladosporium_sp</i>                | CN56    | BSNB_0196 | Capnodiales       | <i>Cladosporium</i>     |
| <i>Penicillium_sanguifluum</i>        | CN57    | BSNB_0197 | Eurotiales        | <i>Penicillium</i>      |
| <i>Exophiala_xenobiotica</i>          | CN60bis | BSNB_0201 | Chaetothyriales   | <i>Exophiala</i>        |
| <i>Pseudallescheria_boydii</i>        | CN71    | BSNB_0212 | Microascales      | <i>Pseudallescheria</i> |
| <i>Scedosporium_boydii</i>            | CN75    | BSNB_0216 | Microascales      | <i>Scedosporium</i>     |
| <i>Penicillium_citrinum</i>           | CN77    | BSNB_0218 | Eurotiales        | <i>Penicillium</i>      |
| <i>Paecilomyces_formosus</i>          | CN79    | BSNB_0220 | Eurotiales        | <i>Paecilomyces</i>     |
| <i>Scedosporium_boydii</i>            | CN81    | BSNB_0222 | Microascales      | <i>Scedosporium</i>     |
| <i>Paecilomyces_formosus</i>          | CN83    | BSNB_0224 | Eurotiales        | <i>Paecilomyces</i>     |
| <i>Pestalotiopsis_microspora</i>      | CN84    | BSNB_0225 | Xylariales        | <i>Pestalotiopsis</i>   |
| <i>Pseudallescheria_boydii</i>        | CN85    | BSNB_0226 | Microascales      | <i>Pseudallescheria</i> |
| <i>Aspergillus_aculeatus</i>          | CN86    | BSNB_0227 | Eurotiales        | <i>Aspergillus</i>      |
| <i>Penicillium_rubidurum</i>          | CN87    | BSNB_0228 | Eurotiales        | <i>Penicillium</i>      |
| <i>Penicillium_araracuarensense</i>   | CN102   | BSNB_0243 | Eurotiales        | <i>Penicillium</i>      |
| <i>Penicillium_araracuarensense</i>   | CN103   | BSNB_0244 | Eurotiales        | <i>Penicillium</i>      |
| <i>Aspergillus_sp</i>                 | CN109   | BSNB_0250 | Eurotiales        | <i>Aspergillus</i>      |
| <i>Penicillium_sp</i>                 | CN112   | BSNB_0253 | Eurotiales        | <i>Penicillium</i>      |

|                                       |           |           |                  |                             |
|---------------------------------------|-----------|-----------|------------------|-----------------------------|
| <i>Paecilomyces_formosus</i>          | CN122     | BSNB_0263 | Eurotiales       | <i>Paecilomyces</i>         |
| <i>Rhizomucor_variabilis</i>          | CN125     | BSNB_0266 | Mucorales        | <i>Rhizomucor</i>           |
| <i>Acrodictys_sp</i>                  | A3F8 11.1 | BSNB_0283 | Hypocreales      | <i>Acrodictys</i>           |
| <i>Ochroconis_sp</i>                  | A5F_1 3   | BSNB_0284 | Venturiales      | <i>Ochroconis</i>           |
| <i>Ochroconis_sp</i>                  | A5F_1 5   | BSNB_0285 | Venturiales      | <i>Ochroconis</i>           |
| <i>Sordariomycetes_sp</i>             | A5F1 13   | BSNB_0287 | Sordariales      | <i>Sordariomycetes</i>      |
| <i>Paramicrothyrium_sp</i>            | A5F1 9    | BSNB_0289 | Microthyriales   | <i>Paramicrothyrium</i>     |
| <i>Colletotrichum_gloeosporioides</i> | A5F1 12   | BSNB_0290 | Glomerellales    | <i>Colletotrichum</i>       |
| <i>Apioclypea_sp</i>                  | A5F1 15   | BSNB_0292 | Xylariales       | <i>Apioclypea</i>           |
| <i>Penicillium_sp</i>                 | A5F1 10.1 | BSNB_0293 | Eurotiales       | <i>Penicillium</i>          |
| <i>Chaetomium_sp</i>                  | A6F1 9    | BSNB_0295 | Sordariales      | <i>Chaetomium</i>           |
| <i>Chaetomium_sp</i>                  | A6F1 12   | BSNB_0296 | Sordariales      | <i>Chaetomium</i>           |
| <i>Penicillium_sp</i>                 | A6F1 13   | BSNB_0298 | Eurotiales       | <i>Penicillium</i>          |
| <i>Muscodor_sp</i>                    | A6F1 19   | BSNB_0299 | Xylariales       | <i>Muscodor</i>             |
| <i>Xylaria_sp</i>                     | A6F1 8.2  | BSNB_0300 | Xylariales       | <i>Xylaria</i>              |
| <i>Albonectria_rigidiuscula</i>       | A8F_1 9.1 | BSNB_0301 | Hypocreales      | <i>Albonectria</i>          |
| <i>Fusarium_sp</i>                    | A8F_1 9.2 | BSNB_0302 | Hypocreales      | <i>Fusarium</i>             |
| <i>Fusarium_sp</i>                    | A8F_1 13  | BSNB_0303 | Hypocreales      | <i>Fusarium</i>             |
| <i>Sordariomycetes_sp</i>             | A8F1 2    | BSNB_0304 | Sordariales      | <i>Sordariomycetes</i>      |
| <i>Chaetomium_sp</i>                  | A8F1 5    | BSNB_0305 | Sordariales      | <i>Chaetomium</i>           |
| <i>Oxydothis_sp</i>                   | A1F12 12  | BSNB_0516 | Xylariales       | <i>Oxydothis</i>            |
| <i>Diaporthe_sp</i>                   | A2F_1 4.1 | BSNB_0520 | Diaporthales     | <i>Diaporthe</i>            |
| <i>Stereum_hirsutum</i>               | A2F_1 7   | BSNB_0523 | Russulales       | <i>Stereum</i>              |
| <i>Pseudopestalotiopsis_sp</i>        | A2F_1 10  | BSNB_0526 | Xylariales       | <i>Pseudopestalotiopsis</i> |
| <i>Endomelanconiopsis_endophytica</i> | A2F1 1    | BSNB_0528 | Botryosphaerales | <i>Endomelanconiopsis</i>   |
| <i>Colletotrichum_gloeosporioides</i> | A2F1_2    | BSNB_0529 | Glomerellales    | <i>Colletotrichum</i>       |
| <i>Colletotrichum_gloeosporioides</i> | A2F1 3.1  | BSNB_0530 | Glomerellales    | <i>Colletotrichum</i>       |
| <i>Stereum_hirsutum</i>               | A2F1 3.2  | BSNB_0531 | Russulales       | <i>Stereum</i>              |
| <i>Stereum_hirsutum</i>               | A2F1 4.1  | BSNB_0532 | Russulales       | <i>Stereum</i>              |
| <i>Nodulisporium_sp</i>               | A2F1 6    | BSNB_0534 | Xylariales       | <i>Nodulisporium</i>        |

|                                       |               |           |                  |                           |
|---------------------------------------|---------------|-----------|------------------|---------------------------|
| <i>Colletotrichum_gloeosporioides</i> | A2F1 8        | BSNB_0536 | Glomerellales    | <i>Colletotrichum</i>     |
| <i>Colletotrichum_gloeosporioides</i> | A2F1 9        | BSNB_0537 | Glomerellales    | <i>Colletotrichum</i>     |
| <i>Colletotrichum_gloeosporioides</i> | A2F1<br>10.22 | BSNB_0538 | Glomerellales    | <i>Colletotrichum</i>     |
| <i>Nemania_sp</i>                     | A2F1 11       | BSNB_0539 | Xylariales       | <i>Nemania</i>            |
| <i>Colletotrichum_gloeosporioides</i> | A2F1 12       | BSNB_0540 | Glomerellales    | <i>Colletotrichum</i>     |
| <i>Diaporthe_sp</i>                   | A2F1 13       | BSNB_0541 | Diaporthales     | <i>Diaporthe</i>          |
| <i>Clonostachys_sp</i>                | A2F11 3       | BSNB_0546 | Hypocreales      | <i>Clonostachys</i>       |
| <i>Stereum_hirsutum</i>               | A2F11<br>6.11 | BSNB_0532 | Russulales       | <i>Stereum</i>            |
| <i>Colletotrichum_sp</i>              | A2F11<br>6.21 | BSNB_0549 | Glomerellales    | <i>Colletotrichum</i>     |
| <i>Stereum_hirsutum</i>               | A2F11 7       | BSNB_0550 | Russulales       | <i>Stereum</i>            |
| <i>Colletotrichum_gloeosporioides</i> | A2F11_8       | BSNB_0551 | Glomerellales    | <i>Colletotrichum</i>     |
| <i>Neopestalotiopsis_sp</i>           | A2F11<br>12.1 | BSNB_0556 | Xylariales       | <i>Neopestalotiopsis</i>  |
| <i>Colletotrichum_vietnamense</i>     | A2F11 13      | BSNB_0557 | Glomerellales    | <i>Colletotrichum</i>     |
| <i>Colletotrichum_gloeosporioides</i> | A2F11 15      | BSNB_0559 | Glomerellales    | <i>Colletotrichum</i>     |
| <i>Colletotrichum_gloeosporioides</i> | A3F1<br>8.121 | BSNB_0574 | Glomerellales    | <i>Colletotrichum</i>     |
| <i>Fusarium_concolor</i>              | A3F1 8.13     | BSNB_0575 | Hypocreales      | <i>Fusarium</i>           |
| <i>Diaporthe_sp</i>                   | A3F1 9        | BSNB_0577 | Diaporthales     | <i>Diaporthe</i>          |
| <i>Diaporthe_sp</i>                   | A3F1 10       | BSNB_0578 | Diaporthales     | <i>Diaporthe</i>          |
| <i>Cladosporium_cladosporioides</i>   | A3F1 11       | BSNB_0579 | Capnodiales      | <i>Cladosporium</i>       |
| <i>Colletotrichum_gloeosporioides</i> | A3F8 1        | BSNB_0580 | Glomerellales    | <i>Colletotrichum</i>     |
| <i>Fusarium_sp</i>                    | A3F8 2        | BSNB_0581 | Hypocreales      | <i>Fusarium</i>           |
| <i>Endomelanconiopsis_endophytica</i> | A3F8 3        | BSNB_0582 | Botryosphaerales | <i>Endomelanconiopsis</i> |
| <i>Colletotrichum_sp</i>              | A3F8 4        | BSNB_0583 | Glomerellales    | <i>Colletotrichum</i>     |
| <i>Endomelanconiopsis_endophytica</i> | A3F8 6        | BSNB_0584 | Botryosphaerales | <i>Endomelanconiopsis</i> |
| <i>Xylaria_sp</i>                     | A3F8 5.2      | BSNB_0586 | Xylariales       | <i>Xylaria</i>            |
| <i>Endomelanconiopsis_sp</i>          | A3F8 8        | BSNB_0587 | Botryosphaerales | <i>Endomelanconiopsis</i> |
| <i>Endomelanconiopsis_endophytica</i> | A3F8 9        | BSNB_0588 | Botryosphaerales | <i>Endomelanconiopsis</i> |
| <i>Cladosporium_sp</i>                | A3F8 10       | BSNB_0589 | Capnodiales      | <i>Cladosporium</i>       |
| <i>Colletotrichum_gloeosporioides</i> | A3F8 12       | BSNB_0590 | Glomerellales    | <i>Colletotrichum</i>     |

|                                       |            |           |                |                       |
|---------------------------------------|------------|-----------|----------------|-----------------------|
| <i>Colletotrichum_fruticola</i>       | A5F_1 1    | BSNB_0615 | Glomerellales  | <i>Colletotrichum</i> |
| <i>Colletotrichum_gloeosporioides</i> | A5F1 3     | BSNB_0622 | Glomerellales  | <i>Colletotrichum</i> |
| <i>Colletotrichum_gloeosporioides</i> | A5F1 3     | BSNB_0623 | Glomerellales  | <i>Colletotrichum</i> |
| <i>Thanatephorus_cucumeris</i>        | A5F1 5     | BSNB_0624 | Cantharellales | <i>Thanatephorus</i>  |
| <i>Colletotrichum_gloeosporioides</i> | A5F1 6.1   | BSNB_0625 | Glomerellales  | <i>Colletotrichum</i> |
| <i>Colletotrichum_sp</i>              | A5F1 11    | BSNB_0627 | Glomerellales  | <i>Colletotrichum</i> |
| <i>Colletotrichum_theobromicola</i>   | A5F1 17    | BSNB_0628 | Glomerellales  | <i>Colletotrichum</i> |
| <i>Colletotrichum_theobromicola</i>   | A5F10 9    | BSNB_0637 | Glomerellales  | <i>Colletotrichum</i> |
| <i>Cladosporium_cladosporioides</i>   | A5F10 10   | BSNB_0638 | Capnodiales    | <i>Cladosporium</i>   |
| <i>Colletotrichum_gloeosporioides</i> | A5F10 13   | BSNB_0641 | Glomerellales  | <i>Colletotrichum</i> |
| <i>Hypoxyton_investiens</i>           | A5F10 14.1 | BSNB_0642 | Xylariales     | <i>Hypoxyton</i>      |
| <i>Diaporthe_sp</i>                   | A6F_1 2    | BSNB_0644 | Diaporthales   | <i>Diaporthe</i>      |
| <i>Colletotrichum_theobromicola</i>   | A6F_1 3    | BSNB_0645 | Glomerellales  | <i>Colletotrichum</i> |
| <i>Colletotrichum_gloeosporioides</i> | A6F1 1     | BSNB_0646 | Glomerellales  | <i>Colletotrichum</i> |
| <i>Fusarium_sp</i>                    | A6F1 2     | BSNB_0647 | Hypocreales    | <i>Fusarium</i>       |
| <i>Colletotrichum_gloeosporioides</i> | A6F1 5.1   | BSNB_0649 | Glomerellales  | <i>Colletotrichum</i> |
| <i>Colletotrichum_gloeosporioides</i> | A6F1 7     | BSNB_0650 | Glomerellales  | <i>Colletotrichum</i> |
| <i>Fusarium_sp</i>                    | A6F1 10    | BSNB_0651 | Hypocreales    | <i>Fusarium</i>       |
| <i>Colletotrichum_theobromicola</i>   | A6F1 11    | BSNB_0652 | Glomerellales  | <i>Colletotrichum</i> |
| <i>Colletotrichum_gloeosporioides</i> | A6F1 15.2  | BSNB_0653 | Glomerellales  | <i>Colletotrichum</i> |
| <i>Colletotrichum_gloeosporioides</i> | A6F1 16.1  | BSNB_0654 | Glomerellales  | <i>Colletotrichum</i> |
| <i>Colletotrichum_gloeosporioides</i> | A6F16 2    | BSNB_0655 | Glomerellales  | <i>Colletotrichum</i> |
| <i>Thanatephorus_cucumeris</i>        | A6F16 7.2  | BSNB_0660 | Cantharellales | <i>Thanatephorus</i>  |
| <i>Colletotrichum_gloeosporioides</i> | A6F16 9.1  | BSNB_0662 | Glomerellales  | <i>Colletotrichum</i> |
| <i>Acutodesmus_obliquus</i>           | A6F16 7.2  | BSNB_0664 | Sphaeropleales | <i>Acutodesmus</i>    |
| <i>Nodulisporium_sp</i>               | A6F16 13   | BSNB_0666 | Xylariales     | <i>Nodulisporium</i>  |
| <i>Cladosporium_herbarum</i>          | A6F16 15   | BSNB_0668 | Capnodiales    | <i>Cladosporium</i>   |
| <i>Fusarium_lateritium</i>            | A7F_1 10   | BSNB_0678 | Hypocreales    | <i>Fusarium</i>       |
| <i>Diaporthe_sp</i>                   | A7F1 1     | BSNB_0679 | Diaporthales   | <i>Diaporthe</i>      |

|                                       |                   |           |                  |                           |
|---------------------------------------|-------------------|-----------|------------------|---------------------------|
| <i>Endomelanconiopsis_endophytica</i> | A7F1 2            | BSNB_0680 | Botryosphaerales | <i>Endomelanconiopsis</i> |
| <i>Endomelanconiopsis_endophytica</i> | A7F1 3            | BSNB_0681 | Botryosphaerales | <i>Endomelanconiopsis</i> |
| <i>Colletotrichum_siamense</i>        | A7F1 4            | BSNB_0682 | Glomerellales    | <i>Colletotrichum</i>     |
| <i>Endomelanconiopsis_endophytica</i> | A7F1 6            | BSNB_0684 | Botryosphaerales | <i>Endomelanconiopsis</i> |
| <i>Fusarium_avenaceum</i>             | A7F1 9            | BSNB_0686 | Hypocreales      | <i>Fusarium</i>           |
| <i>Diaporthe_sp</i>                   | A7F1 10           | BSNB_0687 | Diaporthales     | <i>Diaporthe</i>          |
| <i>Colletotrichum_gloeosporioides</i> | A7F1 11           | BSNB_0688 | Glomerellales    | <i>Colletotrichum</i>     |
| <i>Penicillium_verrucosum</i>         | A7F10 1           | BSNB_0691 | Eurotiales       | <i>Penicillium</i>        |
| <i>Endomelanconiopsis_endophytica</i> | A7F10 2           | BSNB_0692 | Botryosphaerales | <i>Endomelanconiopsis</i> |
| <i>Endomelanconiopsis_endophytica</i> | A7F10 3           | BSNB_0693 | Botryosphaerales | <i>Endomelanconiopsis</i> |
| <i>Colletotrichum_theobromicola</i>   | A7F10 6.1         | BSNB_0694 | Glomerellales    | <i>Colletotrichum</i>     |
| <i>Colletotrichum_theobromicola</i>   | A7F10 7.1         | BSNB_0695 | Glomerellales    | <i>Colletotrichum</i>     |
| <i>Colletotrichum_gloeosporioides</i> | A7F10 8           | BSNB_0696 | Glomerellales    | <i>Colletotrichum</i>     |
| <i>Colletotrichum_theobromicola</i>   | A7F10 11          | BSNB_0699 | Glomerellales    | <i>Colletotrichum</i>     |
| <i>Apioclypea_sp</i>                  | A7F10 12          | BSNB_0700 | Xylariales       | <i>Apioclypea</i>         |
| <i>Colletotrichum_gloeosporioides</i> | A7F10 13.1        | BSNB_0701 | Glomerellales    | <i>Colletotrichum</i>     |
| <i>Fusarium_lateritium</i>            | A7F10 13.2        | BSNB_0702 | Hypocreales      | <i>Fusarium</i>           |
| <i>Colletotrichum_theobromicola</i>   | A7F10 14.2        | BSNB_0703 | Glomerellales    | <i>Colletotrichum</i>     |
| <i>Fusarium_lateritium</i>            | A8F_1 4           | BSNB_0707 | Hypocreales      | <i>Fusarium</i>           |
| <i>Harknessia_australiensis</i>       | A8F1 3            | BSNB_0717 | Xylariales       | <i>Harknessia</i>         |
| <i>Xylaria_sp</i>                     | A8F1 4            | BSNB_0718 | Xylariales       | <i>Xylaria</i>            |
| <i>Oxydothis_sp</i>                   | A8F1 6.2          | BSNB_0720 | Xylariales       | <i>Oxydothis</i>          |
| <i>Endomelanconiopsis_endophytica</i> | A8F11 9           | BSNB_0731 | Botryosphaerales | <i>Endomelanconiopsis</i> |
| <i>Akanthomyces_attenuatus</i>        | A8F11 10          | BSNB_0732 | Hypocreales      | <i>Akanthomyces</i>       |
| <i>Endomelanconiopsis_endophytica</i> | A8F11 11          | BSNB_0733 | Botryosphaerales | <i>Endomelanconiopsis</i> |
| <i>Colletotrichum_gloeosporioides</i> | AC A2<br>F11 9.21 | BSNB_1019 | Glomerellales    | <i>Colletotrichum</i>     |
| <i>Colletotrichum_theobromicola</i>   | VECD4B            | BSNB_1021 | Glomerellales    | <i>Colletotrichum</i>     |
| <i>Pestalotiopsis_sp</i>              | VECD4A            | BSNB_1036 | Xylariales       | <i>Pestalotiopsis</i>     |
| <i>Pestalotiopsis_sp</i>              | VECD4C            | BSNB_1037 | Xylariales       | <i>Pestalotiopsis</i>     |



|                                    |          |           |             |                       |
|------------------------------------|----------|-----------|-------------|-----------------------|
| <i>Beauveria_bassiana</i>          | VECD6B   | BSNB_1038 | Hypocreales | <i>Beauveria</i>      |
| <i>Trichoderma_sp</i>              | VECD6D   | BSNB_1040 | Hypocreales | <i>Trichoderma</i>    |
| <i>Beauveria_bassiana</i>          | VECD6E   | BSNB_1041 | Hypocreales | <i>Beauveria</i>      |
| <i>Beauveria_bassiana</i>          | VECD11A  | BSNB_1042 | Hypocreales | <i>Beauveria</i>      |
| <i>Mucor_sp</i>                    | VECD11D  | BSNB_1043 | Mucorales   | <i>Mucor</i>          |
| <i>Penicillium_sp</i>              | VECD11E  | BSNB_1044 | Eurotiales  | <i>Penicillium</i>    |
| <i>Penicillium_sp</i>              | VECD11F  | BSNB_1045 | Eurotiales  | <i>Penicillium</i>    |
| <i>Penicillium_simplicissimum</i>  | VECD11G  | BSNB_1046 | Eurotiales  | <i>Penicillium</i>    |
| <i>Neosartorya_sp</i>              | VECD13B  | BSNB_1048 | Eurotiales  | <i>Neosartorya</i>    |
| <i>Penicillium_oxalicum</i>        | VECD13C  | BSNB_1049 | Eurotiales  | <i>Penicillium</i>    |
| <i>Beauveria_bassiana</i>          | VECD16B  | BSNB_1053 | Hypocreales | <i>Beauveria</i>      |
| <i>Pestalotiopsis_theae</i>        | VECD14E  | BSNB_1054 | Xylariales  | <i>Pestalotiopsis</i> |
| <i>Fusarium_sp</i>                 | ST1C     | BSNB_1055 | Hypocreales | <i>Fusarium</i>       |
| <i>Lecanicillium_sp</i>            | ST4C     | BSNB_1056 | Hypocreales | <i>Lecanicillium</i>  |
| <i>Fusarium_sp</i>                 | ST7C     | BSNB_1057 | Hypocreales | <i>Fusarium</i>       |
| <i>Fusarium_sp</i>                 | ST9C     | BSNB_1058 | Hypocreales | <i>Fusarium</i>       |
| <i>Arthrinium_sp</i>               | ST10C    | BSNB_1059 | Sordariales | <i>Arthrinium</i>     |
| <i>Penicillium_sp</i>              | ST12C    | BSNB_1061 | Hypocreales | <i>Penicillium</i>    |
| <i>Mucor_hiemalis</i>              | ST15C    | BSNB_1063 | Mucorales   | <i>Mucor</i>          |
| <i>Fusarium_sp</i>                 | ST18C    | BSNB_1065 | Hypocreales | <i>Fusarium</i>       |
| <i>Penicillium_sp</i>              | ST21C    | BSNB_1067 | Eurotiales  | <i>Penicillium</i>    |
| <i>Beauveria_sp</i>                | CLL14070 | BSNB_1069 | Hypocreales | <i>Beauveria</i>      |
| <i>Isaria_farinosa</i>             | CLL10038 | BSNB_1250 | Hypocreales | <i>Isaria</i>         |
| <i>Cordyceps_militaris</i>         | CLL10030 | BSNB_1252 | Hypocreales | <i>Cordyceps</i>      |
| <i>Ophiocordyceps_forquignonii</i> | CLL11056 | BSNB_1253 | Hypocreales | <i>Ophiocordyceps</i> |

TABLE S4. 16S OF STUDIED BACTERIAL STRAINS (BSNB)

>BSNB\_0016\_ *Bacillus\_cereus*

CCCGCGTCGCATTAGCTAGTTGGTGAGGTAACGGCTCACCAAGGCAACGATGCGTAGCCGA  
CCTGAGAGGGTGATCGGCCACACTGGGACTGAGACACGGCCCAGACTCCTACGGGAGGCA  
GCAGTAGGGAATCTTCCGCAATGGACGAAAGTCTGACGGAGCAACGCCGCGTGAGTGATGA  
AGGCTTTCGGGTCGTAAACTCTGTTGTTAGGGAAGAACAAGTGCTAGTTGAATAAGCTGGC  
ACCTTGACGGTACCTAACCAGAAAGCCACGGCTAACTACGTGCCAGCAGCCGCGGTAAATAC  
GTAGGTGGCAAGCGTTATCCGGAATTATTGGGCGTAAAGCGCGCGCAGGTGGTTTCTTAAGT  
CTGATGTGAAAGCCCACGGCTCAACCGTGGAGGGTCATTGGAAACTGGGAGACTTGAGTGC  
AGAAGAGGAAAGTGGAATTCATGTGTAGCGGTGAAATGCGTAGAGATATGGAGGAACAC  
CAGTGGCGAAGGCGACTTCTGGTCTGTAAGTACACTGAGGCGCGAAAGCGTGGGGAGCA  
AACAGGATTAGATACCCTGGTAGTCCACGCCGTAAACGATGAGTGCTAAGTGTTAGGGGGT  
TTCCGCCCTTTAGTGCTGAAGTTAACGCATTAAGCACTCCGCC

>BSNB\_0034\_ *Brevibacillus\_sp*

GGCGGGCTGCTAATACATGCAAGTCGAGCGAGTCTCTTCGGAGGCTAGCGGCGGACGGGTG  
AGTAACACGTAGGCAACCTGCCTCTCAGACTGGGATAACATAGGGAACTTATGCTAATAC  
CGGATAGGTTTTTGGACCGCATGGTCCGAAAAGAAAAGATGGCTTCGGCTATCACTGGGAG  
ATGGGCCTGCGGCGCATTAGCTAGTTGGTGGGGTAACGGCCTACCAAGGCGACGATGCGTA  
GCCGACCTGAGAGGGTGACCGGCCACACTGGGACTGAGACACGGCCCAGACTCCTACGGG  
AGGCAGCAGTAGGGAATTTCCACAATGGACGAAAGTCTGATGGAGCAACGCCGCGTGAAC  
GATGAAGGTCTTCGATTGTAAAGTTCTGTTGTTAGGGACGAATAAGTACCGTTCTGAATAGG  
GCGGTACCTTGACGGTACCTGACGAGAAAGCCACGGCTAACTACGTGCCAGCAGCCGCGGT  
AATACA

>BSNB\_0053\_ *Bacillus\_sp*

GACAGTGGCGGGGTGCTTACACATGCAAGTCGAACGGAAAGGCCCTGCTTTTGTGGGGTGT  
CGTGTGGAGAAGGGGTGTGTAAACCGTGTGTACCCTGCCCTTGTCTTTGGGATAACTTCGGG  
AAACTGGGGCTAATACCGGATAAGAGCTCCTGCTGCGTGGTGGGGGTGGAAAGTTTCTGCG  
GGGGGATGGACTCGCGGCTTATCTATTTGTTGGTGGGGTAGTGGCTTACCAAGGCTTTGAC  
GGGTAGCCGGCCTGACAGGGTGGCCGACCACTTTGGGACTGAGATACAGCCCACACTCATA  
CCGGAGGCAGCAGTGGGGAATATTTATAGATGGGCGGAAGCCTGATGCACTGCGCCGCGTG  
CGGGATGACGGCCTTAAGGTTGTAAACCCCTTTACCTGTGACTAAGCGTGAATGACGGGTA  
TGGGTAAATAAGCACCGCCTAACTACATGCCATCAGACGCCCTAATATAACACCGTGCCAG  
CAGCCGCGGTAATACAAAAAAGGGGGGT

>BSNB\_0139\_ *Serratia\_sp*

GCGGCGGCTTACACATGCAAGTCGAGCGGTAGCACAAAGGAGCTTGCTCYCTGGGTGACGA  
GCGGCGGACGGGTGAGTAATGTCTGGGAACTGCCTGATGGAGGGGGATAACTACTGGAAA  
CGGTAGCTAATACCGCATAACGTCGCARGACCAAAGAGGGGGACCTTCGGGCCTCTTGCCA  
TCAGATGTGCCAGATGGGATTAGCTAGTAGGTGGGGTAATGGCTCACCTAGGCAACRATSC  
CTAGMTGGTCTGAGAGGATGACCAGCCACACTGGAAGTGGAGACACGGTCCAKACTCCTACG  
GGAGGCAGCAGTGGGGAATATTGCACAATGGGCGCAAGCCTGATGCAGCCRTGCCGCGTGT  
GTGAAGAAGGCCTTCGGGTTGTAAAGCACTTTCAGCGAGRAGGAAGGTGGTGAAGTTAATA  
CGTTCATCAATTGACGTTACTCGAAAAAAGCACCGGCCAACTCCGTGCCAGCASCSSGR  
GTAATAMAGCGGCGGCTTACACATGCAAGTCGAGCGGTAGCACAAAGGAGCTTGCTCYCTG  
GGTGACGAGCGGCGGACGGGTGAGTAATGTCTGGGAACTGCCTGATGGAGGGGGATAACT  
ACTGGAAACGGTAGCTAATACCGCATAACGTCGCARGACCAAAGAGGGGGACCTTCGGGCC  
TCTTGCCATCAGATGTGCCAGATGGGATTAGCTAGTAGGTGGGGTAATGGCTCACCTAGGC  
AACRATSCCTAGMTGGTCTGAGAGGATGACCAGCCACACTGGAAGTGGAGACACGGTCCAKA

CTCCTACGGGAGGCAGCAGTGGGGAATATTGCACAATGGGCGCAAGCCTGATGCAGCCRTG  
CCGCGTGTGTGAAGAAGGCCTTCGGGTTGTAAAGCACTTTCAGCGAGRAGGAAGGTGGTGA  
ACTTAATACGTTTCATCAATTGACGTTACTCGCAAAAAAAGCACCGGCCAACTCCGTGCCAGC  
ASCCGSGRGTAAATAMA

>BSNB\_0140\_ *Serratia\_marcescens*

GCGGGAGGCCTAACACATGCAAGCCGAGCGGTAGAGATCTTTCGGGATCTTGAGAGCGGCG  
TACGGGTGCGGAACACGTGTGCAACCTGCCTTTATCTGGGGGATAGCCTTTCGAAAGGAAG  
ATTAATACCCATAATATATCGACTGGCATCAGTTGATATTGAAAACCTCCGGTGGATAGAGA  
TGGGCACGCGCAAGATTAGATAGTTGGTGAGGTAACGGCTCACCAAGTCTGCGATCTTTAGG  
GGGCCTGAGAGGGTGATCCCCCACACTGGTACTGAGACACGGACCAGACTCCTACGGGAGG  
CAGCAGTGAGGAATATTGGACAATGGGTGAGAGCCTGATCCAGCCATCCCGCGTGAAGGAC  
GACGGCCCTATGGGTTGTAACTTCTTTTGTATAGGGATAAACCTAGATACGTGTATCTAGCT  
GAAGGTACTATACGAATAAGCACCGGCTAACTCCGTGCCAGCAGCCGCGGTAATACGGAGG  
GTGCAAGCGTTATCCGGATTTATTGGGTTTAAAGGGTCCGTAGGCGGATTTGTAAGTCAGTG  
GTGAAATCTCACAGCTTAACTGTGAACTGCCATTGATACTGCAAGTCTTGAGTGTGTGTTGA  
AGTAGCTGGAATAAGTAGTGTAGCGGTGAAATGCATAGATATTACTTAGAACACCAATTGC  
GAAGGCAGGTTACTAAGCAACAACCTGACGCTGATGGACGAAAGCGTGGGGAGCGAACAGG  
ATTAGATACCCTGGTAGTCCACGCCGTAAACGATGCTAACTCGTTTTTGGGCTTTCGGGTTCA  
GAGACTAAGCGAAAGTGATAAGTTAG

>BSNB\_0143\_ *Burkholderia\_seminalis*

TGCTCTTGGGTGACGAGTGGCGGACGGGTGAGTAATGTCTGGGGATCTGCCCGATAGAGGG  
GGATAACCACTGGAAACGGTGGCTAATACCGCATAACGTCGCAAGACCAAAGAGGGGGGAC  
CTTCGGGCCTCTCACTATCGGATGAACCCAGATGGGATTAGCTAGTAGGCGGGGTAATGGCC  
CACCTAGGCGACGATCCCTAGCTGGTCTGAGAGGATGACCAGCCACACTGGAAGTGAAGACA  
CGGTCCAGACTCCTACGGGAGGCAGCAGTGGGGAATATTGCACAATGGGCGCAAGCCTGAT  
GCAGCCATGCCGCGTGTATGAAGAAGGCCTTCGGGTTGTAAAGTACTTTCAGCGGGGAGGA  
AGGCGACGGGGTTAATAACCTGTGATTGACGTTACCCGCAGAAGAAGCACCGGCTAACT  
CCGTGCCAGCAGCCGCGGTAATACGGAGGGTGAAGCGTTAATCGGAATTACTGGGCGTAA  
AGCGCACGCAGGCGGTCTGTAAAGTCAGATGTGAAATCCCCGGGCTTAACCTGGGAAGTGC  
ATTTGAAACTGGCAGGCTTGAGTCTTGTAGAGGGGGGTAGAATTCAGGTGTAGCGGTGAA  
ATGCGTAGAGATCTGGAGGAATACCGGTGGCGAAGGCGGCCCCCTGGACAAAGACTGACG  
CTCAGGTGCGAAAGCGTGGGGAGCAAACAGGATTAGATACCCTGGTAGTCCACGCCGTAAA  
CGATGTCGACTTGAGAGTTGTTCCCTTGAGGAGTGGCTTCCGGAGCTAACGCGTTAAGT

>BSNB\_0150\_ *Pseudomonas\_beteli*

GAGTGAACGCTGGCGGTAGGCCTAACACATGCAAGTCGAACGGCAGCACAGGAGAGCTTG  
CTCTCTGGGTGGCGAGTGGCGGACGGGTGAGGAATACATCGGAATCTACTCTGTCGTGGGG  
GATAACGTAGGGAACTTACGCTAATACCGCATAACGACCTACGGGTGAAAGCAGGGGATCT  
TCGGACCTTGCGCGATTGAATGAGCCGATGTCGGATTAGCTAGTTGGCGGGGTAAAGGCC  
ACCAAGGCGACGATCCGTAGCTGGTCTGAGAGGATGATCAGCCACACTGGAAGTGAAGACAC  
GGTCCAGACTCCTACGGGAGGCAGCAGTGGGGAATATTGGACAATGGGCGCAAGCCTGATC  
CAGCCATAACGCGTGGGTGAAGAAGGCCTTCGGGTTGTAAAGCCCTTTTGTGGGAAAGAA  
ATCCAGCCGGCTAATACCTGGTTGGGATGACGGTACCCAAAGAATAAGCACCGGCTAACTT  
CGTGCCAGCAGCCGCGGTAATACGAAGGGTGCAAGCGTTACTCGGAATTACTGGGCGTAAA  
GCGTGCGTAGGTGGTTATTTAAGTCCGTTGTGAAAGCCCTGGGCTCAACCTGGGAAGTGCAG  
TGGATACTGGATGACTAGAATGTGGTAGAGGGTAGCGGAATTCCTGGTGTAGCAGTGAAAT  
GCGTAGAGATCAGGAGGAACATCCATGGCGAAGGCAGCTACCTGGACCAACATTGACACT  
GAGGCACGAAAGCGTGGGGAGCAAACAGGATTAGATACCCTGGTAGTCCACGCCCTAAAC

GATGCGAACTGGATGTTGGGTGCAATTTGGCACGCAGTATCGAAGCTAACGCGTTAAGTTCCG  
CCG

>BSNB\_0152\_ *Serratia\_marcescens*

CGGCAGGCTTAACACATGCAAGTCGAGCGGTAGCACAAGGGAGCTTGCTCYCTGGGTGACG  
AGCGGCGGACGGGTGAGTAATGTCTGGGAACTGCCTGATGGAGGGGGATAACTACTGGAA  
ACGGTAGCTAATACCGCATAACGTCGCAAGACCAAAGAGGGGGACCTTCGGGCCTCTTGCC  
ATCAGATGTGCCCAGATGGGATTAGCTAGTAGGTGGGGTAATGGCTCACCTAGGCGACGAT  
CCCTAGCTGGTCTGAGAGGATGACCAGCCACACTGGAAGTACGACACGGTCCAGACTCCTA  
CGGGAGGCAGCAGTGGGGAATATTGCACAATGGGCGCAAGCCTGATGCAGCCATGCCGCGT  
GTGTGAAGAAGGCCTTCGGGTTGTAAAGCACTTTCAGCGAGGAGGAAGGTGGTGAACCTAA  
TACGTTTCATCAATTGACGTTACTCGCAGAAGAAGCACCGGCTAACTCCGTGCCAGCAGCCG  
CRRGGTAATACA

>BSNB\_0153\_ *Achromobacter\_sp*

GCGGGWGCCTTACACATGCAAGTCGAACGGCAGCACGGACTTCGGTCTGGTGGCGAGTGGC  
GAACGGGTGAGTAATGTATCGGAACGTGCCTAGTAGCGGGGGATAACTACGCGAAAGCGTA  
GCTAATACCGCATAACGCCCTACGGGGGAAAGCAGGGGATCGCAAGACCTTGCACTATTAGA  
GCGGCCGATATCGGATTAGCTAGTTGGTGGGGTAACGGCTCACCAAGGCGACGATCCGTAG  
CTGGTTTGAGAGGACGACCAGCCACACTGGGACTGAGACACGGCCCAGACTCCTACGGGAG  
GCAGCAGTGGGGAATTTTGGACAATGGGGGAAACCCTGATCCAGCCATCCCGCGTGTGCGA  
TGAAGGCCTTCGGGTTGTAAAGCACTTTTGGCAGGAAAGAAACGTCATGGGTAAATACCCC  
GTGAAACTGACGGTACCTGCAGAATAAGCACCGGCTAACTACGTGCCAGCAGCCGCGGGTA  
ATACA

>BSNB\_0158\_ *Burkholderia\_sp*

GCCTTACACATGCAAGTCGAACGGCAGCACGGGTGCTTGACCTGGTGGCGAGTGGCGAAC  
GGGTGAGTAATACATCGGAACATGTCTGTAGTGGGGGATAGCCCGGCGAAAGCCGGATTA  
ATACCGCATAACGATCTACGGATGAAAGCGGGGGACCTTCGGGCCTCGCGCTATAGGGTTGG  
CCGATGGCTGATTAGCTAGTTGGTGGGGTAAAGGCCTACCAAGGCGACGATCAGTAGCTGG  
TCTGAGAGGACGACCAGCCACACTGGGACTGAGACACGGCCCAGACTCCTACGGGAGGCA  
GCAGTGGGGAATTTTGGACAATGGGCGAAAGCCTGATCCAGCAATGCCGCGTGTGTGAAGA  
AGGCCTTCGGGTTGTAAAGCACTTTTGTCCGGAAGAAATCCTTGCCCTAATACGGTCGGG  
GGATGACGGTACCGGAAGAATAAGCACCGGCTAACTACGTGCCAGCAGCCGCGGGTAAT  
ACA

>BSNB\_0165\_ *Serratia\_marcescens*

GCGGMGGCTTAACACATGCAAGTCGAGCGGTAGCACAAGRGAGCTTGCTCTCTGGGTGACG  
AGCGGCGGACGGGTGAGTAATGTCTGGGAACTGCCTGATGGAGGGGGATAACTACTGGAA  
ACGGTAGCTAATACCGCATAACGTCGCAAGACCAAAGAGGGGGACCTTCGGGCCTCTTGCC  
ATCAGATGTGCCCAGATGGGATTAGCTAGTAGGTGGGGTAATGGCTCACCTAGGCGACGAT  
CCCTAGCTGGTCTGAGAGGATGACCAGCCACACTGGAAGTACGACACGGTCCAGACTCCTA  
CGGGAGGCAGCAGTGGGGAATATTGCACAATGGGCGCAAGCCTGATGCAGCCATGCCGCGT  
GTGTGAAGAAGGCCTTCGGGTTGTAAAGCACTTTCAGCGAGGAGGAAGGTGGTGARCTTAA  
TACGYTCATCAATTGACGTTACTCGCAGAAGAAGCACCGGCTAACTCCGTGCCAGCAGCCGS  
GGGGTAATACA

>BSNB\_0166\_ *Burkholderia\_sp*

GGMMTGCCTTACACATGCAAGTCGAACGGCAGCACGGGTGCTTGACCTGGTGGCGAGTGG  
CGAACGGGTGAGTAATACATCGGAACATGTCCTGTAGTGGGGGATAGCCCGGCGAAAGCCG  
GATTAATACCGCATACGATCTACGGATGAAAGCGGGGGACCTTCGGGCCTCGCGCTATAGG  
GTTGGCCGATGGCTGATTAGCTAGTTGGTGGGGTAAAGGCCTACCAAGGCGACGATCAGTA  
GCTGGTCTGAGAGGACGACCAGCCACACTGGGACTGAGACACGGCCCAGACTCCTACGGG  
AGGCAGCAGTGGGGAATTTTGGACAATGGGCGAAAGCCTGATCCAGCAATGCCGCGTGTGT  
GAAGAAGGCCTTCGGGTTGTAAAGCACTTTTGTCCGGAAAGAAATCCTTGGCCCTAATACGG  
TCGGGGGATGACGGTACCGGAAGAATAAGCACCGGCTAACTACGTGCCAGCAGCCGCGNG  
TAATACA

>BSNB\_0170\_ Burkholderia\_pyrrocinia

CGGGTGCCTTACACATGCAAGTCGAACGGCAGCACGGGTGCTTGACCTGGTGGCGAGTGG  
CGAACGGGTGAGTAATACATCGGAACATGTCCTGTAGTGGGGGATAGCCCGGCGAARGCCG  
GATTAATACCGCATACGATCTACGGATGAAAGCGGGGGACCTTCGGGCCTCGCGCTATAGG  
GTTGGCCGATGGCTGATTAGCTAGTTGGTGGGGTAAAGGCCTACCAAGGCGACGATCAGTA  
GCTGGTCTGAGAGGACGACCAGCCACACTGGGACTGAGACACGGCCCAGACTCCTACGGG  
AGGCAGCAGTGGGGAATTTTGGACAATGGGCGAAAGCCTGATCCAGCAATGCCGCGTGTGT  
GAAGAAGGCCTTCGGGTTGTAAAGCACTTTTGTCCGGAAAGAAATCCTTGGCTCTAATACAG  
TCGGGGGATGACGGTACCGGAAGAATAAGCACCGGCAAACTACGTGCCAGCAGCCGCGGG  
TAATACA

>BSNB\_0171\_ Burkholderia\_sp

CGGCTGCCTTACACATGCAAGTCGAACGGCAGCACGGGTGCTTGACCTGGTGGCGAGTGG  
CGAACGGGTGAGTAATACATCKGAACATGTCCTGTAGTGGGGGATAGCCCGGCGAAGGCCG  
GATTAATACCGCAYACGATCTACGGATGAAAGCGGGGGACCTTCGGGCCTCGCGCTATAGG  
GTTGGCCGATGGCTGATTARCTAGTTGGTGGGGTAAAGGCCTACCAAGGCGACMATCARTA  
GCTGGTCTGAGAGGACGACCAGCCACACTGGGACTGAGACACGGCCCAGACTCCTACSGGA  
GGCAGCAGTGGGGAATTTTGGACAATGGGCGAAAGCCTGATCCAGCMATGCCKCGTGTGTG  
AAGAAGGCCTTCGGGTTGTAAAGCACTTTTGTCCGGAAAGAAATCCTTGRCTCTAATACAGT  
CGGGGGATGACGGTACCGGAAGAATAAGCACCGGCAAACTACGTGCCAGCAGCCGCSGSTA  
ATACA

>BSNB\_0172\_ Burkholderia\_cepacia

MTGCCTTACACATGCAGTCGACGGCAGCACGGGTGCTTGACCTGGTGGCGAGTGGCGAAC  
GGGTGAGTAATACATCGGAACATGTCCTGTAGTGGGGGATAGCCCGGCGAAAGCCGGATTA  
ATACCGCATACGATCTACGGATGAAAGCGGGGGACCTTCGGGCCTCGCGCTATAGGGTTGG  
CCGATGGCTGATTAGCTAGTTGGTGGGGTAAAGGCCTACCAAGGCGACGATCAGTAGCTGG  
TCTGAGAGGACGACCAGCCACACTGGGACTGAGACACGGCCCAGACTCCTACGGGAGGCA  
GCAGTGGGGAATTTTGGACAATGGGCGAAAGCCTGATCCAGCAATGCCGCGTGTGTGAAGA  
AGGCCTTCGGGTTGTAAAGCACTTTTGTCCGGAAAGAAATCCTTGGCTCTAATACAGTCGGG  
GGATGACGGTACCGGAAGAATAAGCACCGGCAAACTACGTGCCAGCAGCCGCGGGTAATA  
CAA

>BSNB\_0178\_ Burkholderia\_sp

GGCGGCTGCCTTACACATGCAAGTCGAACGGCAGCACGGGTGCTTGACCTGGTGGCGAGT  
GGCGAACGGGTGAGTAATACATCGGAACATGTCCTRTAGTGGGGGATAGCCCGGCGAAAGC  
CGGATTAATACCGCATACGATCTACGGATGAAAGCGGGGGACCTTCGGGCCTCGCGCTATA  
GGGTTGGCCGATGGCTGATTAGCTAGTTGGTGGGGTAAAGGCCTACCAAGGCGACGATCAG

TAGCTGGTCTGAGAGGACGACCAGCCACACTGGGACTGAGACACGGCCCAGACTCCTACGG  
GAGGCAGCAGTGGGGAATTTTGGACAATGGGCGAAAGCCTGATCCAGCAATGCCGCGTGTG  
TGAAGAAGGCCTTCGGGTTGTAAAGCACTTTTGTCCGGAAAGAAATCCTTGCTCTAATACA  
GTCGGGGGATGACGGTACCGGAAGAATAAGCACCGGCWAACTACGTGCCAGCAGCCGSRR  
GTAATACA

>BSNB\_0179\_ *Lactococcus\_garvieae*

CTCAGGACGAACGCTGGCGGCGTGCCTAATACATGCAAGTCGAGCGATGATTAAAGATAGC  
TTGCTATTTTATGAAGAGCGGCGAACGGGTGAGTAACGCGTGGGAAATCTGCCGAGTAGC  
GGGGGACAACGTTTGGAAACGAACGCTAATACCGCATAACAATGAGAATCGCATGATTTTC  
ATTTAAAAGAAGCAATTGCTTCACTACTTGATGATCCCGCGTTGTATTAGCTAGTTGGTAGTG  
TAAAGGACTACCAAGGCGATGATACATAGCCGACCTGAGAGGGTGATCGGCCACACTGGG  
ACTGAGACACGGCCCAGACTCCTACGGGAGGCAGCAGTAGGGAATCTTCGGCAATGGGGG  
CAACCCTGACCGAGCAACGCCGCGTGAGTGAAGAAGGTTTTCGGATCGTAAAACTCTGTTGT  
TAGAGAAGAACGTTAAGTAGAGTGGAATACTTAAGTGACGGTATCTAACCAGAAAGGG  
ACGGCTAACTACGTGCCAGCAGCCGCGGTAATACGTAGGTCCCAAGCGTTGTCCGGATTTAT  
TGGGCGTAAAGCGAGCGCAGGTGGTTTCTTAAGTCTGATGTAAAAGGCAGTGGCTCAACCA  
TTGTGTGCATTGGAACCTGGGAGACTTGAGTGCAGGAGAGGAGAGTGGAATTCCATGTGTA  
GCGGTGAAATGCGTAGATATATGGAGGAACACCGGAGGCGAAAGCGGCTCTCTGGCCTGTA  
ACTGACACTGAGGCTCGAAAGCGTGCGGAGCAAACAGGATTAGATACCCTGGTAGTCCACG  
CCGTAAACGATGAGTGCTAGCTGTAGGGAGCTATAAGTTCTCTGTAGCGCAGCTAACGCATT  
AAGCACTCCGCCT

>BSNB\_0180\_ *Lactococcus\_garvieae*

TGGCGGGCTGCCTAATACATGCAAGTCGAGCGATGATTAAAGATAGCTTGCTATTTTATGA  
AGAGCGGCGAACGGGTGAGTAACGCGTGGGAAATCTGCCGAGTAGCGGGGGACAACGTTT  
GGAAACGAACGCTAATACCGCATAACAATGAGAATCGCATGATTTTCATTTAAAAGAAGCA  
ATTGCTTCACTACTTGATGATCCCGCGTTGTATTAGCTAGTTGGTAGTGTAAGGACTACCAA  
GGCGATGATACATAGCCGACCTGAGAGGGTGATCGGCCACACTGGGACTGAGACACGGCCC  
AGACTCCTACGGGAGGCAGCAGTAGGGAATCTTCGGCAATGGGGGCAACCCTGACCGAGC  
AACGCCGCGTGAGTGAAGAAGGTTTTCGGATCGTAAAACTCTGTTGTTAGAGAAGAACGTT  
AAGTAGAGTGGAATACTTAAGTGACGGTATCTAACCAGAAAGGGACGGCTAACTACGT  
GCCAGCAGCCGGRAGGTAATACA

>BSNB\_0181\_ *Burkholderia\_arboris*

CAGATTGAACGCTGGCGGCATGCCTTACACATGCAAGTCGAACGGCAGCACGGGTGCTTGC  
ACCTGGTGGCGAGTGGCGAACGGGTGAGTAATACATCGGAACATGTCCTGTAGTGGGGGAT  
AGCCCGGCGAAAGCCGGATTAATACCGCATAACGATCTACGGATGAAAGCGGGGGACCTTCG  
GGCCTCGCGCTATAGGGTTGGCCGATGGCTGATTAGCTAGTTGGTGGGGTAAAGGCCTACCA  
AGCGGACGATCAGTAGCTGGTCTGAGAGGACGACCAGCCACACTGGGACTGAGACACGGC  
CCAGACTCCTACGGGAGGCAGCAGTGGGGAATTTTGGACAATGGGCGAAAGCCTGATCCAG  
CAATGCCGCGTGTGTGAAGAAGGCCTTCGGGTTGTAAAGCACTTTTGTCCGGAAAGAAATCC  
TTGGCCCTAATACGGTCGGGGGATGACGGTACCGGAAGAATAAGCACCGGCTAACTACGTG  
CCAGCAGCCGCGGTAATACGTAGGGTGCAGCGTTAATCGGAATTACTGGGCGTAAAGCGT  
GCGCAGGCGGTTTGCTAAGACCGATGTGAAATCCCCGGGCTCAACCTGGGAACTGCATTGG  
TGAAGTGGCAGGCTAGAGTATGGCAGAGGGGGGTAGAATTCCACGTGTAGCAGTGAAATGCG  
TAGAGATGTGGAGGAATACCGATGGCGAAGGCAGCCCCCTGGGCCAATACTGACGCTCATG  
CACGAAAGCGTGGGGAGCAAACAGGATTAGATACCCTGGTAGTCCACGCCCTAAACGATGT  
CAACTAGTTGTTGGGGATTCAATTCCTTAGTAACGTAGCTAACGCGTGAAGTTGACCGCC

>BSNB\_0182\_ *Enterobacter*\_tabaci

CGAACGGCTGGCGGCGTGCCTAATACATGCAAGTTGAGCGCTGAAGGTTGGTACTTGTACCG  
ACTGGATGAGCAGCGAACGGGTGAGTAACGCGTGGGGAATCTGCCTTTGAGCGGGGGACA  
ACATTTGGAAACGAATGCTAATACCGCATAAAAACTTTAAACACAAGTTTTAAGTTTGAAA  
GATGCAATTGCATCACTCAAAGATGATCCCGCGTTGTATTAGCTAGTTGGTGAGGTAAAGGC  
TCACCAAGGCGATGATACATAGCCGACCTGAGAGGGTGATCGGCCACATTGGGACTGAGAC  
ACGGCCCAAACCTCCTACGGGAGGCAGCAGTAGGGAATCTTCGGCAATGGACGAAAGTCTGA  
CCGAGCAACGCCGCGTGAGTGAAGAAGGTTTTTCGGATCGTAAAACCTCTGTTGGTAGAGAAG  
AACGTTGGTGAGAGTGGAAGCTCATCAAGTGACGGTAACTACCCAGAAAGGGACGGCTA  
ACTACGTGCCAGCAGCCGCGGTAATACGTAGGTCCCGAGCGTTGTCCGGATTTATTGGGCGT  
AAAGCGAGCGCAGGTGGTTTATTAAGTCTGGTGTAAGGAGCAGTGGCTCAACCATTGTATGC  
ATTGGAACTGGTAGACTTGAGTGCAGGAGAGGAGAGTGGAATTCCATGTGTAGCGGTGAA  
ATGCGTAGATATATGGAGGAACACCGGTGGCGAAAGCGGCTCTCTGGCCTGTAAGTACAC  
TGAGGCTCGAAAGCGTGGGGAGCAAACAGGATTAGATACCTCTGGTAGTCCACGCCGTAAA  
CGATGAGTGCTAGATGTAGGGAGCTATAAGTTCTCTGTATCGCAGCTAACGCAATAAGC

>BSNB\_0191\_ *Enterobacter*\_tabaci

GGCGGCCTACACATGCAAGTCGAGCGGATGAGAGGAGCTTGCTCCTGGATTACGCGGCGGA  
CGGGTGAGTAATGCCTAGGAATCTGCCTGGTAGTGGGGGACAACGTTTCGAAAGGAACGCT  
AATACCGCATACGTCCTACGGGAGAAAGCAGGGGACCTTCGGGCCTTGCGCTATCAGATGA  
GCCTAGGTCCGATTAGCTAGTTGGTGAGGTAATGGCTCACCAAGGCGACGATCCGTAAGT  
GTCTGAGAGGATGATCAGTCACACTGGAAGTGAAGACACGGTCCAGACTCCTACGGGAGGCA  
GCAGTGGGGAATATTGGACAATGGGCGAAAGCCTGATCCAGCCATGCCGCGTGTGTGAAGA  
AGGTCTTCGGATTGTAAAGCACTTTAAGTTGGGAGGAAGGGCAGTAAATTAATACTTTGCTG  
TTTTGACGTTACCGACAGAATAAGCACCGGCTAACTCTGTGCCAGCAGCCGCNNGTAATAC  
A

>BSNB\_0192\_ *Enterobacter*\_tabaci

CGAGCGGCGGACGGGTGAGTAATGTCTGGGAACTGCCTGATGGAGGGGGATAACTACTGG  
AAACGGTAGCTAATACCGCATAACGTCGCAAGACCAAAGAGGGGGACCTTCGGGCCTCTTG  
CCATCAGATGTGCCCAGATGGGATTAGCTAGTAGGTGGGGTAACGGCTCACCTAGGCGACG  
ATCCCTAGCTGGTCTGAGAGGATGACCAGCCACACTGGAAGTGAAGACACGGTCCAGACTCC  
TACGGGAGGCAGCAGTGGGGAATATTGCACAATGGGCGCAAGCCTGATGCAGCCATGCCGC  
GTGTATGAAGAAGGCCTTCGGGTTGTAAAGTACTTTCAGCGGGGAGGAAGGTGTTGAGGTTA  
ATAACCTCAGCAATTGACGTTACCCGCGAGAAGAAGCACCGGCTAACTCCGTGCCAGCAGCC  
GCGGTAATACGGAGGGTGCAAGCGTTAATCGGAATTACTGGGCGTAAAGCGCACGCAGGCG  
GTCTGTCAAGTCGGATGTGAAATCCCCGGGCTCAACCTGGGAACTGCATTGAAACTGGCA  
GGCTAGAGTCTTGTAGAGGGGGGTAGAATTCCAGGTGTAGCGGTGAAATGCGTAGAGATCT  
GGAGGAATACCGGTGGCGAAGGCGGCCCCCTGGACAAAGACTGACGCTCAGGTGCGAAAG  
CGTGGGGAGCAAACAGGATTAGATACCCTGGTAGTCCACGCCGTAAACGATGTGCACTTGG  
AGGTTGTGCCCTTGAGGCGTGGCTTCCGGAGCTAACGCGTTAAGTCGACC

>BSNB\_0194\_ *Pseudomonas*\_sp

GMGGCCTAACACATGCAAGTCGAGCGGTAGAGAGAAGCTTGCTTCTCTTGAGAGCGGCGGA  
CGGGTGAGTAATGCCTAGGAATCTGCCTGGTAGTGGGGGATAACGTTTCGGAAACGAACGCT  
AATACCGCATACGTCCTACGGGAGAAAGCAGGGGACCTTCGGGCCTTGCGCTATCAGATGA  
GCCTAGGTCCGATTAGCTAGTTGGTGAGGTAATGGCTCACCAAGGCGACGATCCGTAAGT  
GTCTGAGAGGATGATCAGTCACACTGGAAGTGAAGACACGGTCCAGACTCCTACGGGAGGCA  
GCAGTGGGGAATATTGGACAATGGGCGAAAGCCTGATCCAGCCATGCCGCGTGTGTGAAGA  
AGGTCTTCGGATTGTAAAGCACTTTAAGTTGGGAGGAAGGGCATTAAACCTAATACGTTAGTG

TTTTGACGTTACCGACAGAATAAGCACCGGCTAACTCTGTGCCAGCAGCCGCGGGTAATAC  
A

>BSNB\_0202\_ *Kitasatospora\_sp*

GGCGTGCTTACACATGCAAGTCGAACGGTGAAGCCCTTCGGGGTGGATCAGTGGCGAACGG  
GTGAGTAACACGTGGGGAATCTGCCCTGAACTCTGGGACAAGCCTTGGAACGAGGTCTAA  
TACCGGATACGACCTTCTCCTGCATGGGGGTGGTGGAAAAGCTCCGGCGGTTTCAGGATGATC  
CCGCGGCCTATCAGCTTGTTGGTGGGGTAATGGCCTACCAAGGCGACGACGGGTAGCCGGC  
CTGAGAGGGGCGACCGGCCACACTGGGACTGAGACACGGCCCAGACTCCTACGGGAGGCAG  
CAGTGGGGAATATTGCACAATGGGCGGAAGCCTGATGCAGCGACGCCGCGTGAGGGATGA  
CGGCCCTTCGGGTGTAAACCTCTTTCAGCAGGGAAGAAGCGCAAGTGACGGTACCTGCAGA  
AGAAGCACCGGCTAACTACGTGCCAGCAGCCGCGGGGTAAATACA

>BSNB\_0230\_ *Bacillus\_cereus*

TGGCGGCGTGCTAATACATGCAAGTCGAGCGAATGGATTGAGAGCTTGCTCTCAAGAAAGTT  
AGCGGCGGACGGGTGAGTAACACGTGGGTAACCTGCCCATAAGACTGGGATAACTCCGGG  
AAACCGGGGCTAATACCGGATAACATTTTGAACYGCATGGTTCGAAATTGAAAGGCGGCTT  
CGGCTGTCACTTATGGATGGACCCGCGTCGCATTAGCTAGTTGGTGAGGTAACGGCTCACCA  
AGGCAACGATGCGTAGCCGACCTGAGAGGGTGATCGGCCACACTGGGACTGAGACACGGC  
CCAGACTCCTACGGGAGGCAGCAGTAGGGAATCTTCCGCAATGGACGAAAGTCTGACGGAG  
CAACGCCGCGTGAGTGATGAAGGCTTTCGGGTCGTAAAACCTCTGTNGTTAGGGAAGAACAA  
GTGCTAGTTGAATAAGCTGGCACCTTGACGGTACCTAACCAGAAAGCCACGGCTAACTACG  
TGCCAGCAGCCGCRGTAATACA

>BSNB\_0232\_ *Bacillus\_cereus*

TAGGCGGCTGCCTAATACATGCAAGTCGAGCGAATGGATTAAGAGCTTGCTCTTATGAAGTT  
AGCGGCGGACGGGTGAGTAACACGTGGGTAACCTGCCCATAAGACTGGGATAACTCCGGG  
AAACCGGGGCTAATACCGGATAACATTTTGAACCGCATGGTTCGAAATTGAAAGGCGGCTT  
CGGCTGTCACTTATGGATGGACCCGCGTCGCATTAGCTAGTTGGTGAGGTAACGGCTCACCA  
AGGCAACGATGCGTAGCCGACCTGAGAGGGTGATCGGCCACACTGGGACTGAGACACGGC  
CCAGACTCCTACGGGAGGCAGCAGTAGGGAATCTTCCGCAATGGACGAAAGTCTGACGGAG  
CAACGCCGCGTGAGTGATGAAGGCTTTCGGGTCGTAAAACCTCTGTTGTTAGGGAAGAACAA  
GTGCTAGTTGAATAAGCTGGCACCTTGACGGTACCTAACCAGAAAGCCACGGCTAACTACG  
TGCCAGCAGCCGCGGGTAATACA

>BSNB\_0233\_ *Lysinibacillus\_xylanilyticus*

GTCGAGCGAACAGAGAAGGAGCTTGCTCCTTTGACGTTAGCGGCGGACGGGTGAGTAACAC  
GTGGGCAACCTACCTTATAGTTTGGGATAACTCCGGGAAACCGGGGCTAATACCGAATAAT  
CTATTTCACTTCATGGTGAAATACTGAAAGACGGCATCTCGCTGTCGCTATAAGATGGGCCC  
GCGGCGCATTAGCTAGTTGGTGAGGTAACGGCTCACCAAGGCGACGATGCGTAGCCGACCT  
GAGAGGGTGATCGGCCACACTGGGACTGAGACACGGCCCAGACTCCTACGGGAGGCAGCA  
GTAGGGAATCTTCCACAATGGGCGAAAGCCTGATGGAGCAACGCCGCGTGAGTGAAGAAG  
GTTTTCGGATCGTAAAACCTCTGTTGTAAGGGAAGAACAAGTACAGTAGTAACTGGCTGTACC  
TTGACGGTACCTTATTAGAAAGCCACGGCTAACTACGTGCCAGCAGCCGCGGTAATACGTA  
GGTGGCAAGCGTTGTCCGGAATTATTGGGCGTAAAGCGCGCGCAGGCGGTCCTTTAAGTCTG  
ATGTGAAAGCCACGGCTCAACCGTGAGGGTCATTGGAAACTGGGGGACTTGAGTGCAGA  
AGAGGAAAGTGGAATCCAAGTGATAGCGGTGAAATGCGTAGAGATTTGGAGGAACACCAG  
TGCGGAAGGCGACTTTCTGGTCTGTAACCTGACGCTGAGGCGCGAAAGCGTGGGGAGCAAAC



AGGATTAGATACCCTGGTAGTCCACGCCGTAAACGATGAGTGCTAAGTGTTAGGGGGTTTCC  
GCCCCTTAGTGCTGCAGCTAACGCATTAAGCACTCCGC

>BSNB\_0234\_ *Streptomyces\_sp*

TGGSGGGCTGCTTACACATGCAAGTCGAACGATGAAGCCCTTCGGGGTGGATTAGTGGCGA  
ACGGGTGAGTAACACGTGGGCAATCTGCCCTGCACTCTGGGACAAGCCCTGGAACGGGGT  
CTAATACCGGATATGACCATCTTGGGCATCCTTGATGGTGTAAGCTCCGGCGGTGCAGGAT  
GAGCCCCGCGCCTATCAGCTTGTTGGTGAGGTAATGGCTCACCAAGGCGACGACGGGTAGC  
CGGCCTGAGAGGGCGACCGGCCACACTGGGACTGAGACACGGCCCAGACTCCTACGGGAG  
GCAGCAGTGGGGAATATTGCACAATGGGCGAAAGCCTGATGCAGCGACGCCGCGTGAGGG  
ATGACGGCCTTCGGGTTGTAAACCTCTTTCAGCAGGGAAGAAGCGAAAGTGACGGTACCTG  
CAGAAGAAGCGCCGGCTAACTACGTGCCAGCAGCCGCGGGTAATACAA

>BSNB\_0235\_ *Bacillus\_firmus*

GGCGGCGTGCTAATACATGCAAGTCGAGCGGAYTKMTGGGAGCTTGCTCCCTGAAGTCAG  
CGGCGGACGGGTGAGTAACACGTGGGCAACCTGCCTGTAAGACTGGGATAACTCCGGGAA  
ACCGGGGCTAATACCGGATAATTCTTTCCTCACATGAGGGAAAGCTGAAAGATGGTTTCGG  
CTATCACTTACAGATGGGCCCGCGGCGCATTAGCTAGTTGGTGAGGTAACGGCTCACCAAG  
GCGACGATGCGTAGCCGACCTGAGAGGGTGATCGGCCACACTGGGACTGAGACACGGCCC  
AGACTCCTACGGGAGGCAGCAGTAGGGAATCTTCCGCAATGGACGAAAGTCTGACGGAGC  
AACGCCGCGTGAGTGATGAAGGTTTTCGGATCGTAAACTCTGTTGTTAGGGAAGAACAAG  
TACCGGAGTAACTGCCGGTACCTTGACGGTACCTAACCAGAAAGCCACGGCTAACTACGTG  
CCAGCAGCCGCGGGTAATAC

>BSNB\_0236\_ *Bacillus\_sp*

TGCGGCGTGCTAATACATGCAAGTCGAGCGAATGGATTAAGAGCTTGCTCTTATGAAGTTA  
GCGGCGGACGGGTGAGTAACACGTGGGTAACCTGCCATAAGACTGGGATAACTCCGGGA  
AACCGGGGCTAATACCGGATAACATTTTGAACYGCATGGTTGAAATTGAAAGGCGGCTTC  
GGCTGTCACTTATGGATGGACCCGCGTCGCATTAGCTAGTTGGTGAGGTAACGGCTCACCA  
GGCAACGATGCGTAGCCGACCTGAGAGGGTGATCGGCCACACTGGGACTGAGACACGGCC  
CAGACTCCTACGGGAGGCAGCAGTAGGGAATCTTCCGCAATGGACGAAAGTCTGACGGAGC  
AACGCCGCGTGAGTGATGAAGGCTTTCGGGTCGTAAACTCTGTTGTTAGGGAAGAACAAG  
TGCTAGTTGAATAAGCTGGCACCTTGACGGTACCTAACCAGAAAGCCACGGCTAACTACGT  
GCCAGCAGCCGCGGGTAATACA

>BSNB\_0239\_ *Lysinibacillus\_sp*

GGCGGCGTGCTAATACATGCAAGTCGAGCGAACAGAAAAGGAGCTTGCTCCTTTGACGTT  
AGCGGCGGACGGGTGAGTAACACGTGGGCAACCTACCTTATAGTTTGGGATAACTCCGGGA  
AACCGGGGCTAATACCGAATAATCTATTTCACTTCATGGTGAAATACTGAAAGACGGCATCT  
CGCTGTCGCTATAAGATGGGCCCGCGGCGCATTAGCTAGTTGGTGAGGTAACGGCTCACCA  
AGGCGACAATGCGTAGCCAACCTGAGAGGGTGATCGGCCACACTGGGACTGAGACACGGC  
CCAGACTCCTACGGGAGGCAGCAGTAGGGAATCTTCCACAATGGGCGAAAGCCTGATGGAG  
CAACGCCCCGTGAGTGAAGAAGGTTTTCGGATCGTAAACTCTGTTGTAAGGGAAGAACA  
GTACAGTAGTAACTGGCTGTACCTTGACGGTACCTTATTAGAAAGCCACGGCTAACTACGTG  
CCAGCAGCCGCGGKTAATACA

>BSNB\_0240\_ *Enterobacter\_tabaci*

GTGCTAACAATGCAAGTCGAAGCGGTATYACATAGKCCTTGCTTCCCTGGGAGTMRAGGGG

GGGAGGGGTGACCATGTGTGGGCCCACCTTTAAGATAACGGAAGCTTCCGGAATGTTGTCTM  
TCATACCCGGTAAACATCTCAACCCCAAGGAGGGGGACCGGWAATTGGTTTGCCTTCCWAT  
GATCCATGACCGGACTSAGARGAAGGTTGGGCACAGGGTCACTGAAATAACAAGCCTACCT  
TAGWAWGAGGTCATACCAAMCAATTTTGAACATGACCSAGYCATTGATCCCSCTGGAGG  
CAACAGGAGGGAATCTTTATRGTATCCCTCTGGGCTAAGGAGGATAATGACATTACCTCTTG  
ATTAATCCCGGGTTTTCTRSTGCCAAAMTCCGSKATGAAGGGGGAAAACCTTRTKACRTTCATC  
ATTTGMCTCTACTCGCAGCCCAAKCACCAAGCCCACTCCGTGCCACCKGCCGCRRAACCCC  
AG

>BSNB\_0242\_ *Serratia\_marcescens*

GGCGGCTGCCTAATACATGCAAGTCGAGCGAACAGAAAAGGAGCTTGCTCCTTTGACGTTA  
GCGGCGGACGGGTGAGTAACACGTGGGCAACCTACCTTATAGTTTGGGATAACTCCGGGAA  
ACCGGGGCTAATACCGAATAATCTATTTCACTTCATGGTGRAATACTGAAAGACGGCWTCTS  
GYTKTCGYTWAAAAKGGGCCCCGGCGCATTASCTAKTTGGTGAGGTAACGGCTCACCARG  
GCAACAATCCKTASCCAACCTGARAGGGTGATCGGCCACMCTGGGACTGAAACMCGGCCC  
AAACYCCWACGGGAGGCASCAKTAGGGAATCTYCCMCAATGGGCRAARSCCTGATGGASCA  
MCSCCCCGGGAKTRAAAAAGGTTTTCGGATCGWAAAACCTCTTTTGTARGGRAAAAAACA  
ACRGTAKTAMCTGGYTKTACCTTGACGGTMCCTTATWAAAARSCCMCGGCWAAAYTACTTGC  
CASCACCGCGGGTAATACA

>BSNB\_0245\_ *Lysinibacillus\_xylanilyticus*

ACTATCATCAGCGGAGGAGYATMTCAATAAGCGGAGGAKSTWTCRMKAWGCGGRGGAKYG  
YCTAAAKATKAGRGGGARAGGWCTTTAGGATGTTAACCTAGCTAAAGTCAGGCTTAGGCCT  
GGTATCCTAATTCATTATTTACCAAAAGAATTCAGAATTAATTATTGTAACATAAGCGTAAA  
AAACTTATAAAACAACCTTTTAACAACGGATCTCTTGTTCTCGCATCGATGAARAACGTAGC  
AAAGTGCGATAACTAGTGTGAATTGCATATTCAGTGAATCATCGAGTCTTTGAACGCATCTT  
GCGCTCAATGGTATTCCATTGAGCACGCCTGTTTCAGTATCAACAACAACCCACATCCRCAA  
TTTTGTTGTGAATGGAATGAGAGTAATCGACGTTAAAATTGAACTCTTTAAAATTATTAGG  
CCTGAACTATTGTTCTTTTASCCTGAACATTAATTTTAATATAAAGGAATGCTCTAGTTATTAA  
RACTGTCTTGGGGGCCTCCCAAATAAATCATTTTTTAACTTGATCTGAATCAGGTGGGATTA  
CCCGCTGAACTTAAGCATATCAKMGACGWCGGGAGGAAT

>BSNB\_0246\_ *Burkholderia\_sp*

TGGGCGGCATGCCTTACACATGCAAGTCGAACGGCAGCACGGGGGCAACCCTGGTGCGGAG  
TGGCGAACGGGTGAGTAATACATCGGAACGTGTCCTGTAGTGGGGGATAGCCCGGCGAAAG  
CCGGATTAATACCGCATACGATCTACGGAAGAAAGCGGGGGATCTTCGGACCTCGCGCTGC  
AGGGGCGGCCGATGGCAGATTAGCTAGTTGGTGGGGTAAAGGCCTACCAAGGCGACGATCT  
GTAGCTGGTCTGAGAGGACGACCAGCCACACTGGGACTGAGACACGGCCCAGACTCCTACG  
GGAGGCAGCAGTGGGGAATTTTGACAATGGGGGCAACCCTGATCCAGCAATGCCGCGTGT  
GTGAAGAAGGCCTTCGGGTGTAAAGCACTTTTGTCCGGAAAGAAAACCTTACCCGCTAATAT  
CGGGTGGGGATGACGGTACCGGAAGAATAAGCACCGGCTAACTACGTGCCAGCAGCCGCG  
GGTAATACA

>BSNB\_0256\_ *Streptomyces\_malaysiense*

ACGTACGCTGGCGGCGTGCTTAACACATGCAAGTCGAACGATGAAGCCCTTCGGGGTGGAT  
TAGTGGCGAACGGGTGAGTAACACGTGGGCAATCTGCCCTGCACTCTGGGACAAGCCCTGG  
AAACGGGGTCTAATACCGGATATGACCGTCTTGGGCATCCTTGACGGTGTAAAGCTCCGGCG  
GTGCAGGATGAGCCCGCGGCCTATCAGCTTGTTGGTGAGGTAACGGCTCACCAAGGCGACG

ACGGGTAGCCGGCCTGAGAGGGGCGACCGGCCACACTGGGACTGAGACACGGCCCAGACTC  
CTACGGGAGGCAGCAGTGGGGAATATTGCACAATGGGCGAAAGCCTGATGCAGCGACGCC  
GCGTGAGGGATGACGGCCTTCGGGTTGTAAACCTCTTTCAGCAGGGAAGAAGCGAAAGTGA  
CGGTACCTGCAGAAGAAGCGCCGGCTAACTACGTGCCAGCAGCCGCGGTAATACGTAGGGC  
GCAAGCGTTGTCCGGAATTATTGGGCGTAAAGAGCTCGTAGGCGGCTTGTACGTTCGGTTGT  
GAAAGCCCCGGGGCTTAACCCCGGGTCTGCAGTCGATACGGGCAGGCTAGAGTTCGGTAGGG  
GAGATCGGAATTCCTGGTGTAGCGGTGAAATGCGCAGATATCAGGAGGAACACCGGTGGCG  
AAGGCGGATCTCTGGGCCGATACTGACGCTGAGGAGCGAAAGCGTGGGGAGCGAACAGGA  
TTAGATACCCTGGTAGTCCACGCCGTAAACGGTGGGCACTAGGTGTGGGCAACATTCCACGT  
TGTCCTGCGCCGAGCTAACGCATTAAGTCCCCGCCTG

>BSNB\_0493\_ *Paraburkholderia\_tropica*

GAACGCTGGCGGCATGCCTTACACATGCAAGTCGAACGGCAGCACGGGTGCTTGACCTGG  
TGGCGAGTGGCGAACGGGTGAGTAATACATCGGAACGTGTCCTGTAGTGGGGGATAGCCCG  
GCGAAAGCCGGATTAATACCGCATACGATCTGCGGATGAAAGCGGGGGATCTTCGGACCTC  
GCGCTATAGGGGCGGCCGATGGCGGATTAGCTAGTTGGTGGGGTAAAGGCTCACCAAGGCG  
ACGATCCGTAGCTGGTCTGAGAGGACGACCAGCCACACTGGGACTGAGACACGGCCCAGA  
CTCCTACGGGAGGCAGCAGTGGGGAATTTTGGACAATGGGCGAAAGCCTGATCCAGCAATG  
CCGCGTGTGTGAAGAAGGCCTTCGGGTTGTAAAGCACTTTTGTCCGGAAAGAAATCCTTGGT  
CCTAATATGGTCGGGGGATGACGGTACCGGAAGAATAAGCACCGGCTAACTACGTGCCAGC  
AGCCGCGGTAATACGTAGGGTGCAAGCGTTAATCGGAATTACTGGGCGTAAAGCGTGCGCA  
GGCGGTGATGTAAGACCGATGTGAAATCCCCGGGCTCAACCTGGGAACTGCATTGGTGACT  
GCATCGCTTGAGTATGGCAGAGGGGGGTAGAATTCCACGTGTAGCAGTGAAATGCGTAGAG  
ATGTGGAGGAATACCGATGGCGAAGGCAGCCCCCTGGGTCAATACTGACGCTCATGCACGA  
AAGCGTGGGGAGCAAACAGGATTAGATACCCTGGTAGTCCACGCCCTAAACGATGT

>BSNB\_0494\_ *Klebsiella\_michiganensis*

TTCATGGCTCAGATTGAACGCTGGCGGCAGGCCTAACACATGCAAGTCGAGCGGTAGCACG  
GGGAGCTTGCTCCTGGGTGACGAGCGGCGGACGGGTGAGTAATGTCTGGGGATCTGCCTGA  
TGGAGGGGGATAACTACTGGAAACGGTAGCTAATACCGCATAACGTGCGAAGACCAAAGA  
GGGGGACCTTCGGGCCTCTTGCCATCAGATGAACCCAGATGGGATTAGCTAGTAGGTGGGG  
TAATGGCTCACCTAGGCGACGATCCCTAGCTGGTCTGAGAGGATGACCAGCCACACTGGAA  
CTGAGACACGGTCCAGACTCCTACGGGAGGCAGCAGTGGGGAATATTGCACAATGGGCGCA  
AGCCTGATGCAGCCATGCCGCGTGTATGAAGAAGGCCTTCGGGTTGTAAAGTACTTTCAGCG  
AGGAGGAAGGCGTTAAGGTTAATAACCTTGCGGATTGACGTTACTCGCAGAAGAAGCACCG  
GCTAACTCCGTGCCAGCAGCCGCGGTAATACGGAGGGTGCAAGCGTTAATCGGAATTACTG  
GGCGTAAAGCGCACGCAGGCGGTTTGTAAAGTCGGATGTGAAATCCCCGGGCTCAACCTGG  
GAACTGCATTCGAAACTGGCAAGCTTGAGTCTTGTAGAGGGGGGTAGAATTCCAGGTGTAG  
CGGTGAAATGCGTAGAGATCTGGAGGAATACCGGTGGCGAAGGCGGCCCCCTGGACAAAG  
ACTGACGCTCAGGTGCGAAAGCGTGGGGAGCAAACAGGATTAGATACCCTGGTAGTCCACG  
CCGTAAACGATGTCGACTTGGAGGTTGTGCCCTTGAGGCGTGGCTTCGGGAGCTAACGCGTT  
AAGTCGACCGCCTG

>BSNB\_0517\_ *Enterobacter\_asburiae*

GGTCGACTTAACGCGTTAGCTCCGGAAGCCACGCCTCAAGGGCACAACCTCCAAGTCGACA  
TCGTTTACGGCGTGGACTACCAGGGTATCTAATCCTGTTTGCTCCCCACGTTTCGCACCTGA  
GCGTCAGTCTTTGTCCAGGGGGCCGCTTCGCCACCGGTATTCCTCCAGATCTCTACGCATTT  
CACCGCTACACCTGGAATTCTACCCCCCTCTACAAGACTCTAGCCTGCCAGTTTCGAATGCA  
GTTCCCAGGTTGAGCCCCGGGGATTTCACATCCGACTTGACAGACCGCCTGCGTGCGCTTTAC  
GCCCAGTAATTCCGATTAACGCTTGACCCCTCCGTATTACCGCGGCTGCTGGCACGGAGTTA  
GCCGGTGCTTCTTCTGCGGGTAACGTCAATCGACAAGGTTATTAACCTTATCGCCTTCCTCCC

CGCTGAAAGTACTTTACAACCCGAAGGCCTTCTTCATACACGCGGCATGGCTGCATCAGGCT  
TGCGCCCATTTGTGCAATATTCCCCACTGCTGCCTCCCGTAGGAGTCTGGACCGTGTCTCAGTT  
CCAGTGTGGCTGGTCATCCTCTCAGACCAGCTAGGGATCGTCGCCTAGGTGAGCCGTTACCC  
CACCTACTAGCTAATCCCATCTGGGCACATCTGATGGCAAGAGGCCCGAAGGTCCCCCTCTT  
TGGTCTTGCGACGTTATGCGGTATTAGCTACCGTTTCCAGTAGTTATCCCCCTCCATCAGGCA  
GTTTCCCAGACATTACTACCCGTCGCGCGCTCGTCACCCAGGAGCAAGC

>BSNB\_0519\_ Burkholderia\_tropica

TGATTCATGGCTCAGATTGAACGCTGGCGGCATGCCTTACACATGCAAGTCGAACGGCAGC  
ACGGGTGCTTGACCTGGTGGCGAGTGGCGAACGGGTGAGTAATACATCGGAACGTGTCCT  
GTAGTGGGGGATAGCCCGGCGAAAGCCGGATTAATACCGCATAACGATCTACGGATGAAAGC  
GGGGGATCTTCGGACCTCGCGCTATAGGGGGCGGCCGATGGCGGATTAGCTAGTTGGTGAGG  
TAAAGGCTCACCAAGGCGACGATCCGTAGCTGGTCTGAGAGGACGACCAGCCACACTGGG  
ACTGAGACACGGCCCAGACTCCTACGGGAGGCAGCAGTGGGGAATTTTGGACAATGGGCG  
AAAGCCTGATCCAGCAATGCCGCGTGTGTGAAGAAGGCCTTCGGGTGTAAAGCACTTTTGT  
CCGGAAGAAATCCTTGATCCTAATATGGTTCGGGGGATGACGGTACCGGAAGAATAAGCAC  
CGGCTAACTACGTGCCAGCAGCCGCGGTAATACGTAGGGTGCAAGCGTTAATCGGAATTAC  
TGGGCGTAAAGCGTGCGCAGGCGGTGATGTAAGACCGATGTGAAATCCCCGGGCTCAACCT  
GGGAACTGCATTGGTGACTGCATCGCTTGAGTATGGCAGAGGGGGGTAGAATTCCACGTGT  
AGCAGTGAAATGCGTAGAGATGTGGAGGAATACCGATGGCGAAGGCAGCCCCCTGGGTCA  
ATACTGACGCTCATGCACGAAAGCGTGGGGAGCAAACAGGATTAGATACCCTGGTAGTCCA  
CGCCCTAAACGATGTCAACTGGTTGTTCGGGTCTTCATTGACTTGGTAAACGTAGCTAACGCGT  
GAAGTGACCGCCTGG

>BSNB\_0521\_ Burkholderia\_sp

ACTTCACGCGTTAGCTACGTTACCAAGTCAATGAAGACCCGACAACCAGTTCGACATCGTTT  
AGGGCGTGGACTACCAGGGTATCTAATCCTGTTTGCTCCCCACGCTTTCGTGCATGAGCGTC  
AGTATTGACCCAGGGGGCTGCCTTCGCCATCGGTATTTCCTCCACATCTCTACGCATTTCACTG  
CTACACGTGGAATTCTACCCCCCTCTGCCATACTCAAGCCTTGCAAGTACCAATGCAGTTCC  
CAGGTAAAGCCCGGGGATTTACATCGGTCTTACAAAACCGCCTGCGCACGCTTTACGCCCA  
GTAATTCCGATTAACGCTCGCACCCCTACGTATTACCGCGGCTGCTGGCACGTAGTTAGCCGG  
TGCTTATTCTTCCGGTACCGTCATCCCCGCGGGATATTATCCAACAGGATTTCTTTCCGGACA  
AAAGTGCTTTACAACCCGAAGGCCTTCTTACACACGCGGCATTGCTGGATCAGGCTTTTCGC  
CCATTGTCCAAAATTCCCCACTGCTGCCTCCCGTAGGAGTCTGGGCCGTGTCTCAGTCCCAGT  
GTGGCTGGTTCCTCTCAGACCAGCTACGGATCGTCGCCTTGGTAGGCCTTTACCCACCA  
ACTAGCTAATCCGCCATCGGCCACCCCAATAGCGCGAGGTCTTGCGATCCCCCGCTTTTCATC  
CAAAGATCGTATGCGGTATTAATCCGGCTTTCGCCGGGCTATCCCCCACTACTGGACATGTT  
CCGATGTATTACTACCCGTTTCGCCACTCGCCACCAGGTGCAAGCACCCGTGCTGCCGTTTCG  
ACTTGCAATGTGTAAGGCAT

>BSNB\_0547\_ Burkholderia\_tropica

ACACATGCAAGTCGAACGGCAGCACGGGTGCTTGACCTGGTGGCGAGTGGCGAACGGGTG  
AGTAATACATCGGAACGTGTCCTGTAGTGGGGGATAGCCCGGCGAAAGCCGGATTAATACC  
GCATACGATCTACGGATGAAAGCGGGGGATCTTCGGACCTCGCGCTATAGGGGGCGGCCGAT  
GGCGGATTAGCTAGTTGGTGGGGTAAAGGCTCACCAAGGCGACGATCCGTAGCTGGTCTGA  
GAGGACGACCAGCCACACTGGGACTGAGACACGGCCCAGACTCCTACGGGAGGCAGCAGT  
GGGGAATTTTGGACAATGGGCGAAAGCCTGATCCAGCAATGCCGCGTGTGTGAAGAAGGCC  
TTCGGGTGTAAAGCACTTTTGTCCGGAAAGAAATCCTTGATCCTAATATGGTCGGGGGATG  
ACGGTACCGGAAGAATAAGCACCGGCTAACTACGTGCCAGCAGCCGCGGTAATACGTAGG

GTGCAAGCGTTAATCGGAATTACTGGGCGTAAAGCGTGCGCAGGCGGTGATGTAAGACCGA  
TGTGAAATCCCCGGGCTCAACCTGGGAACTGCATTGGTGAAGTGCATCGCTTGAGTATGGCAG  
AGGGGGGTAGAATTCCACGTGTAGCAGTGAAATGCGTAGAGATGTGGAGGAATACCGATGG  
CGAAGGCAGCCCCCTGGGTCAATACTGACGCTCATGCACGAAAGCGTGGGGAGCAAACAG  
GATTAGATACCCTGGTAGTCCACGCCCTAAACGATGTCAACTGGTTGTGCGGTCTTCATTGA  
CTTGGTAACGTAGCTAACGCGTGAAGTGACCGCC

>BSNB\_0561\_ *Bacillus\_thuringiensis*

GTGCTTAATGCGTTAACTTCAGCACTAAAGGGCGGAAACCCTCTAACACTTAGCACTCATCG  
TTTACGGCGTGGACTACCAGGGTATCTAATCCTGTTTGCTCCCCACGCTTTCGCGCCTCAGTG  
TCAGTTACAGACCAGAAAGTCGCCCTTCGCCACTGGTGTTCCTCCATATCTCTACGCATTTAC  
CGCTACACATGGAATTCCACTTTCCTCTTCTGCACTCAAGTCTCCCAGTTTCCAATGACCTC  
CACGGTTGAGCCGTGGGCTTTCACATCAGACTTAAGAAACCACCTGCGCGCGCTTTACGCCC  
AATAATTCCGGATAACGCTTGCCACCTACGTATTACCGCGGCTGCTGGCACGTAGTTAGCCG  
TGGCTTTCCTGGTTAGGTACCGTCAAGGTGCCAGCTTATTCAACTAGCACTTGTTCCTCCCTAA  
CAACAGAGTTTTACGACCCGAAAGCCTTCATCACTCACGCGGCGTTGCTCCGTCAGACTTTC  
GTCCATTGCGGAAGATTCCCTACTGCTGCCTCCCGTAGGAGTCTGGGCGGTGTCTCAGTCCC  
AGTGTGGCCGATCACCTCTCAGGTGGCTACGCATCGTTGCCTTGGTGAGCCGTTACCTCA  
CCAAGTACTAGCTAATGCGACGCGGGTCCATCCATAAGTGACAGCCGAAGCCGCTTTCAATTC  
GAACCATGCAGTTCAAAATGTTATCCGGTATTAGCCCCGGTTTCCCGGAGTTATCCCAGTCTT  
ATGGGCAGGTTACCCACGTGTTACTACCCGTCGCGCGCTAACTTCATAAGAGCAAGCTCTT  
AATCCATTGCTCGACTTGCATGTATTAGGCACGC

>BSNB\_0562\_ *Paraburkholderia\_tropica*

ACTTCACGCGTTAGCTACGTTACTAAGGAAATGAATCCCCAACAACCAGTTGACATCGTTTA  
GGGCGTGGACTACCAGGGTATCTAATCCTGTTTGCTCCCCACGCTTTCGTGCATGAGCGTCA  
GTATTGGCCCAGGGGGCTGCCCTTCGCCATCGGTATTCTCCACATCTCTACGCATTTCACTGC  
TACACGTGGAATTCTACCCCCCTCTGCCATACTCCAGCGATGCAGTCACCAATGCAGTTCCC  
AGGTTGAGCCCGGGGATTTACATCGGTCTTACATCACCGCCTGCGCACGCTTTACGCCCAG  
TAATTCCGATTAACGCTTGACCCCTACGTATTACCGCGGCTGCTGGCACGTAGTTAGCCGGT  
GCTTATTCCTCCGGTACCGTCATCCCCGACGGATATTAGCCATCAGGATTTCTTTCCGGACAA  
AAGTGCTTTACAACCCGAAGGCCTTCTTCACACACGCGGCATTGCTGGATCAGGGTTTCCCC  
CATTGTCCAAAATTCCCCACTGCTGCCTCCCGTAGGAGTCTGGGCGGTGTCTCAGTCCCAGTG  
TGGCTGGTCGTCCTCTCAGACCAGCTACGGATCGTCGCCTTGGTGGGCCTTTACCCACCAA  
CTAGCTAATCCGCCATCGGCCGCCCTATAGCGCGAGGTCCGAAGATCCCCCGCTTTCATCC  
GTAGATCGTATGCGGTATTAATCCGGCTTTCGCCGGGCTATCCCCCACTACAGGACACGTTT  
CGATGTATTACTACCCGTTTCGCCACTCGCCACCAGGTGCAAGCACCCGTGCTGCCGTTTCA  
CTTGCATGTGTAAGGCATGCCGCCAGCGTTCAATC

>BSNB\_0565\_ *Paraburkholderia\_tropica*

CATGCCTTACACATGCAAGTACGAACGGCAGCACGGGTGCTTGCACCTGGTGGCGAGTGGC  
GAACGGGTGAGTAATACATCGGAACGTGTCTGTAGTGGGGGATAGCCCGGCGAAAGCCGG  
ATTAATACCGCATACGATCTACGGATGAAAGCGGGGGATCTTCGGACCTCGCGCTATAGGG  
GCGGCCGATGGCGGATTAGCTAGTTGGTGGGGTAAAGGCCACCAAGGCGACGATCCGTAG  
CTGGTCTGAGAGGACGACCAGCCACACTGGGACTGAGACACGGCCCAGACTCCTACGGGA  
GGCAGCAGTGGGGAATTTGGACAATGGGGGAAACCCTGATCCAGCAATGCCGCGTGTGTG  
AAGAAGGCCTTCGGGTGTAAAGCACTTTTGTCCGGAAAGAAATCCTGATGGCTAATATCCG  
TCGGGGATGACGGTACCGGAAGAATAAGCACCGGCTAACTACGTGCCAGCAGCCGCGGTA  
ATACGTAGGGTGCAAGCGTTAATCGGAATTACTGGGCGTAAAGCGTGCGCAGGCGGTGATG

TAAGACCGATGTGAAATCCCCGGGCTCAACCTGGGAACTGCATTGGTGACTGCATCGCTGG  
AGTATGGCAGAGGGGGGTAGAATTCCACGTGTAGCAGTGAAATGCGTAGAGATGTGGAGG  
AATACCGATGGCGAAGGCAGCCCCCTGGGCCAATACTGACGCTCATGCACGAAAGCGTGGG  
GAGCAAACAGGATTAGATACCCTGGTAGTCCACGCCCTAAACGATGTCAAGGGGTGTGG  
GGATTCATTTCTTAGTAACGTAGCTAACGCGTGA

>BSNB\_0566\_ *Bacillus\_subtilis*

CGGAGTGCTTAATGCGTTAGCTGCAGCACTAAGGGGCGGAAACCCCCTAACACTTAGCACT  
CATCGTTTACGGCGTGGACTACCAGGGTATCTAATCCTGTTTCGCTCCCCACGCTTTCGCTCCT  
CAGCGTCAGTTACAGACCAGAGAGTCGCCTTCGCCACTGGTGTTCCTCCACATCTCTACGCA  
TTTCACCGCTACACGTGGAATTCCACTCTCCTCTTCTGCACTCAAGTTCCCCAGTTTCCAATG  
ACCCTCCCCGGTTGAGCCGGGGGCTTTCACATCAGACTTAAGAAACCGCCTGCGAGCCCTTT  
ACGCCCAATAATTCCGGACAACGCTTGCCACCTACGTATTACCGCGGCTGCTGGCACGTAGT  
TAGCCGTGGCTTTCTGGTTAGGTACCGTCAAGGTACCGCCCTATTGGAACGGTACTTGTTCTT  
CCCTAACAACAGAGCTTTACGATCCGAAAACCTTCATCACTCACGCGGCGTTGCTCCGTCAG  
ACTTTCGTCCATTGCGGAAGATTCCCTACTGCTGCCTCCCGTAGGAGTCTGGGCCGTGTCTCA  
GTCCCAGTGTGGCCGATCACCTCTCAGGTCGGCTACGCATCGTTGCCTTGTTGAGCCGTTAC  
CTCACCAACTAGCTAATGCGCCGCGGGTCCATCTGTAAGTGGTAGCCGAAGCCACCTTTTAT  
GTTTGAACCATGCGGTTCAAACAACCATCCGGTATTAGCCCCGGTTTCCCGGAGTTATCCCA  
GTCTTACAGGCAGGTTACCCACGTGTTACTCACCCGTCCGCGGCTAACATCAGGGAGCAAGC  
TCCCATCTGTCCGCTCGACTTGCATGTATTAGGCACGCCGCCAGCGTTCGTC

>BSNB\_0567\_ *Bacillus\_subtilis*

CGGAGTGCTTAATGCGTTAGCTGCAGCACTAAGGGGCGGAAACCCCCTAACACTTAGCACT  
CATCGTTTACGGCGTGGACTACCAGGGTATCTAATCCTGTTTCGCTCCCCACGCTTTCGCTCCT  
CAGCGTCAGTTACAGACCAGAGAGTCGCCTTCGCCACTGGTGTTCCTCCACATCTCTACGCA  
TTTCACCGCTACACGTGGAATTCCACTCTCCTCTTCTGCACTCAAGTTCCCCAGTTTCCAATG  
ACCCTCCCCGGTTGAGCCGGGGGCTTTCACATCAGACTTAAGAAACCGCCTGCGAGCCCTTT  
ACGCCCAATAATTCCGGACAACGCTTGCCACCTACGTATTACCGCGGCTGCTGGCACGTAGT  
TAGCCGTGGCTTTCTGGTTAGGTACCGTCAAGGTACCGCCCTATTGGAACGGTACTTGTTCTT  
CCCTAACAACAGAGCTTTACGATCCGAAAACCTTCATCACTCACGCGGCGTTGCTCCGTCAG  
ACTTTCGTCCATTGCGGAAGATTCCCTACTGCTGCCTCCCGTAGGAGTCTGGGCCGTGTCTCA  
GTCCCAGTGTGGCCGATCACCTCTCAGGTCGGCTACGCATCGTTGCCTTGTTGAGCCGTTAC  
CTCACCAACTAGCTAATGCGCCGCGGGTCCATCTGTAAGTGGTAGCCGAAGCCACCTTTTAT  
GTTTGAACCATGCGGTTCAAACAACCATCCGGTATTAGCCCCGGTTTCCCGGAGTTATCCCA  
GTCTTACAGGCAGGTTACCCACGTGTTACTCACCCGTCCGCGGCTAACATCAGGGAGCAAGC  
TCCCATCTGTCCGCTCGACTTGCATGTATTAGGCACGCCGCCAGCGTTCGTC

>BSNB\_0568\_ *Bacillus\_subtilis*

CGGAGTGCTTAATGCGTTAGCTGCAGCACTAAGGGGCGGAAACCCCCTAACACTTAGCACT  
CATCGTTTACGGCGTGGACTACCAGGGTATCTAATCCTGTTTCGCTCCCCACGCTTTCGCTCCT  
CAGCGTCAGTTACAGACCAGAGAGTCGCCTTCGCCACTGGTGTTCCTCCACATCTCTACGCA  
TTTCACCGCTACACGTGGAATTCCACTCTCCTCTTCTGCACTCAAGTTCCCCAGTTTCCAATG  
ACCCTCCCCGGTTGAGCCGGGGGCTTTCACATCAGACTTAAGAAACCGCCTGCGAGCCCTTT  
ACGCCCAATAATTCCGGACAACGCTTGCCACCTACGTATTACCGCGGCTGCTGGCACGTAGT  
TAGCCGTGGCTTTCTGGTTAGGTACCGTCAAGGTACCGCCCTATTGGAACGGTACTTGTTCTT  
CCCTAACAACAGAGCTTTACGATCCGAAAACCTTCATCACTCACGCGGCGTTGCTCCGTCAG  
ACTTTCGTCCATTGCGGAAGATTCCCTACTGCTGCCTCCCGTAGGAGTCTGGGCCGTGTCTCA  
GTCCCAGTGTGGCCGATCACCTCTCAGGTCGGCTACGCATCGTTGCCTTGTTGAGCCGTTAC

CTCACCAACTAGCTAATGCGCCGCGGGTCCATCTGTAAGTGGTAGCCGAAGCCACCTTTTAT  
GTTTGAACCATGCGGTTCAAACAACCATCCGGTATTAGCCCCGGTTTCCCGGAGTTATCCCA  
GTCTTACAGGCAGGTTACCCACGTGTTACTACCCCGTCCGCCGCTAACATCAGGGAGCAAGC  
TCCCATCTGTCCGCTCGACTTGCATGTATTAGGCACGCCGCCAGCGTTCGTC

>BSNB\_0569\_ *Pantoea\_dispersa*

GGTCGACTTAACGCGTTAGCTCCGGAAGCCACGCCTCAAGGGCACAACCTCCAAGTCGACA  
TCGTTTACGGCGTGGACTACCAGGGTATCTAATCCTGTTTGGTCCCCACGCTTTCGCACCTGA  
GCGTCAGTCTTCGTCCAGGGGGCCGCCTTCGCCACCGGTATTCCTCCAGATCTCTACGCATTT  
CACCGCTACACCTGGAATTCTACCCCCCTCTACGAGACTCAAGCCTGCCAGTTTCAAATGCA  
GTTCCAGGTTAAGCCCCGGGGATTTCACATCTGACTTAACAGACCGCCTGCGTGCGCTTTAC  
GCCCAGTAATTCCGATTAAACGCTTGCACCCTCCGTATTACCGCGGCTGCTGGCACGGAGTTA  
GCCGGTGCTTCTTCTGCGGGTAACGTCAATCGGCAAGGTTATTAACCTCACCGCCTTCCTCCC  
CGCTGAAAGTACTTTACAACCCGAAGGCCTTCTTCATACACGCGGCATGGCTGCATCAGGCT  
TGCGCCCATTTGTGCAATATTCCCCACTGCTGCCTCCCGTAGGAGTCTGGACCGTGTCTCAGTT  
CCAGTGTGGCTGGTCATCCTCTCAGACCAGCTAGGGATCGTCGCCTAGGTGAGCCATTACCC  
CACCTACTAGCTAATCCCATCTGGGCACATCCGATGGTGTGAGGCCCGAAGGTCCCCCACTT  
TGGTCTTGCGACGTTATGCGGTATTAGCTACCGTTTCCAGTAGTTATCCCCCTCCATCGGGCA  
GTTTCCAGACATTACTACCCCGTCCGCCACTCGCCACCCAAAGAGCAAGCTCTTCTGTGCT  
GCCGTTTCGACTTGCATGTGTTAGGCCTG

>BSNB\_0570\_ *Burkholderia\_tropica*

GGCTCAGATTGAACGCTGGCGGCATGCCTTACACATGCAAGTCGAACGGCAGCACGGGTGC  
TTGCACCTGGTGGCGAGTGGCGAACGGGTGAGTAATACATCGGAACGTGTCCTGTAGTGGG  
GGATAGCCCCGGCGAAAGCCGATTAAATACCGCATACGATCTAGGGATGAAAGCGGGGGAT  
CTTCGGACCTCGCGCTATAGGGGCGGCCGATGGCGGATTAGCTAGTTGGTGGGGTAAAGGCT  
CACCAAGGCGACGATCCGTAGCTGGTCTGAGAGGACGACCAGCCACACTGGGACTGAGAC  
ACGGCCCAGACTCCTACGGGAGGCAGCAGTGGGGAATTTTGACAATGGGCGAAAGCCTG  
ATCCAGCAATGCCGCGTGTGTGAAGAAGGCCTTCGGGTGTAAAGCACTTTTGTCCGGAAAG  
AAATCCTTGATCCTAATATGGTCGGGGGATGACGGTACCGGAAGAATAAGCACCGGCTAAC  
TACGTGCCAGCAGCCGCGTAATACGTAGGGTGCAAGCGTTAATCGGAATTACTGGGCGTA  
AAGCGTGCGCAGGCGGTGATGTAAGACCGATGTGAAATCCCCGGGCTCAACCTGGGAAC TG  
CATTGGTGA CTGCATCGCTTGAGTATGGCAGAGGGGGGTAGAATTCCACGTGTAGCAGTGA  
AATGCGTAGAGATGTGGAGGAATACCGATGGCGAAGGCAGCCCCCTGGGTCAATACTGACG  
CTCATGCACGAAAGCGTGGGGAGCAAACAGGATTAGATAACCCTGGTAGTCCACGCCCTAAA  
CGATGTCAACTGGTTGTGCGGTCTTCATTGACTTGGTAAACGTAGCTAACGCGTGAAGTGACC  
GCCTG

>BSNB\_0572\_ *Burkholderia\_tropica*

ACTTCACGCGTTAGCTACGTTACCAAGTCAATGAAGACCCGACAACCAGTTGACATCGTTTA  
GGGCGTGGACTACCAGGGTATCTAATCCTGTTTGGTCCCCACGCTTTCGTGCATGAGCGTCA  
GTATTGACCCAGGGGGCTGCCTTCGCCATCGGTATTCCTCCACATCTCTACGCATTTCACTGC  
TACACGTGGAATTCTACCCCCCTCTGCCATACTCAAGCGATGCAGTCACCAATGCAGTTCCC  
AGGTTGAGCCCCGGGGATTTCACATCGGTCTTACATACCCGCCTGCGCACGCTTTACGCCCAG  
TAATTCCGATTAAACGCTTGCACCCTACGTATTACCGCGGCTGCTGGCACGTAGTTAGCCGGT  
GCTTATTCTTCCGGTACCGTCATCCCCGACCATATTAGGATCAAGGATTTCTTTCCGGACAA  
AAGTGCTTTACAACCCGAAGGCCTTCTTCACACACGCGGCATTGCTGGATCAGGCTTTCGCC  
CATTGTCCAAAATTCCCCACTGCTGCCTCCCGTAGGAGTCTGGGCCGTGTCTCAGTCCCAGTG  
TGGCTGGTTCGTCTCTCAGACCAGCTACGGATCGTCGCCTTGGTGAGCCTTTACCCACCAA  
CTAGCTAATCCGCCATCGGCCGCCCTATAGCGCGAGGTCCGAAGATCCCCCGCTTTCATCC

GTAGATCGTATGCGGTATTAATCCGGCTTTCGCCGGGCTATCCCCACTACAGGACACGTTC  
CGATGTATTACTACCCGTTCCGCACTCGCCACCAGGTGCAAGCACCCGTGCTGCCGTTTGA  
CTTGCATGTGT

>BSNB\_0573\_ *Bacillus\_subtilis*

CGGAGTGCTTAATGCGTTAGCTGCAGCACTAAGGGGCGGAAACCCCCTAACACTTAGCACT  
CATCGTTTACGGCGTGGACTACCAGGGTATCTAATCCTGTTTCGCTCCCCACGCTTTCGCTCCT  
CAGCGTCAGTTACAGACCAGAGAGTCGCCTTCGCCACTGGTGTTCCTCCACATCTCTACGCA  
TTTCACCGCTACACGTGGAATTCCACTCTCCTCTTCTGCACTCAAGTTCCCCAGTTTCCAATG  
ACCCTCCCCGGTTGAGCCGGGGGCTTTCACATCAGACTTAAGAAACCGCCTGCGAGCCCTTT  
ACGCCCAATAATTCCGGACAACGCTTGCCACCTACGTATTACCGCGGCTGCTGGCACGTAGT  
TAGCCGTGGCTTCTGTTAGGTACCGTCAAGGTACCGCCCTATTCTGAACGGTACTTGTTCCT  
CCCTAACAACAGAGCTTTACGATCCGAAAACCTTCATCACTCACGCGGCGTTGCTCCGTCAG  
ACTTTCGTCCATTGCGGAAGATTCCCTACTGCTGCCTCCCGTAGGAGTCTGGGCCGTGTCTCA  
GTCCCAGTGTGGCCGATCACCTCTCAGGTCGGCTACGCATCGTTGCCTTGGTGAGCCGTTAC  
CTCACCAACTAGCTAATGCGCCGCGGGTCCATCTGTAAGTGGTAGCCGAAGCCACCTTTTAT  
GTTTGAACCATGCGGTTCAAACAACCATCCGGTATTAGCCCCGGTTTCCCGGAGTTATCCCA  
GTCTTACAGGCAGGTTACCCACGTGTTACTACCCGTCCGCCGCTAACATCAGGGAGCAAGC  
TCCCATCTGTCCGCTCGACTTGCATGTATTAGGCACGCCGCCAGCGTTCGTC

>BSNB\_0576\_ *Bacillus\_subtilis*

CGGAGTGCTTAATGCGTTAGCTGCAGCACTAAGGGGCGGAAACCCCCTAACACTTAGCACT  
CATCGTTTACGGCGTGGACTACCAGGGTATCTAATCCTGTTTCGCTCCCCACGCTTTCGCTCCT  
CAGCGTCAGTTACAGACCAGAGAGTCGCCTTCGCCACTGGTGTTCCTCCACATCTCTACGCA  
TTTCACCGCTACACGTGGAATTCCACTCTCCTCTTCTGCACTCAAGTTCCCCAGTTTCCAATG  
ACCCTCCCCGGTTGAGCCGGGGGCTTTCACATCAGACTTAAGAAACCGCCTGCGAGCCCTTT  
ACGCCCAATAATTCCGGACAACGCTTGCCACCTACGTATTACCGCGGCTGCTGGCACGTAGT  
TAGCCGTGGCTTCTGTTAGGTACCGTCAAGGTACCGCCCTATTCTGAACGGTACTTGTTCCT  
CCCTAACAACAGAGCTTTACGATCCGAAAACCTTCATCACTCACGCGGCGTTGCTCCGTCAG  
ACTTTCGTCCATTGCGGAAGATTCCCTACTGCTGCCTCCCGTAGGAGTCTGGGCCGTGTCTCA  
GTCCCAGTGTGGCCGATCACCTCTCAGGTCGGCTACGCATCGTTGCCTTGGTGAGCCGTTAC  
CTCACCAACTAGCTAATGCGCCGCGGGTCCATCTGTAAGTGGTAGCCGAAGCCACCTTTTAT  
GTTTGAACCATGCGGTTCAAACAACCATCCGGTATTAGCCCCGGTTTCCCGGAGTTATCCCA  
GTCTTACAGGCAGGTTACCCACGTGTTACTACCCGTCCGCCGCTAACATCAGGGAGCAAGC  
TCCCATCTGTCCGCTCGACTTGCATGTATTAGGCACGCCGCCAGCGTTCGTC

>BSNB\_0591\_ *Klebsiella\_variicola*

GATTCATGGCTCAGATTGAACGCTGGCGGCAGGCCTAACACATGCAAGTCGAGCGGTAGCA  
CAGAGAGCTTGCTCTCGGGTGACGAGCGGCGGACGGGTGAGTAATGTCTGGGAACTGCCT  
GATGGAGGGGGATAACTACTGGAACGGTAGCTAATACCGCATAACGTCGCAAGACCAAA  
GTGGGGGACCTTCGGGCCTCATGCCATCAGATGTGCCCAGATGGGATTAGCTGGTAGGTGGG  
GTAACGGCTCACCTAGGCGACGATCCCTAGCTGGTCTGAGAGGATGACCAGCCACACTGGA  
ACTGAGACACGGTCCAGACTCCTACGGGAGGCAGCAGTGGGGAATATTGCACAATGGGCGC  
AAGCCTGATGCAGCCATGCCGCGTGTGTGAAGAAGGCCTTCGGGTTGTAAAGCACTTTCAGC  
GGGAGGAAGGCGATAAGGTTAATAACCTCATCGATTGACGTTACCCGCAGAAGAAGCACC  
GGCTAACTCCGTGCCAGCAGCCGCGGTAATACGGAGGGTGCAAGCGTTAATCGGAATTACT  
GGGCGTAAAGCGCACGCAGGCGGTCTGTCAAGTCGGATGTGAAATCCCCGGGCTCAACCTG  
GGAAGTGCATTGCAAACTGGCAGGCTAGAGTCTTGTAGAGGGGGGTAGAATTCCAGGTGTA  
CGGGTGAATGCGTAGAGATCTGGAGGAATACCGGTGGCGAAGGCGGCCCCCTGGACAAA



GACTGACGCTCAGGTGCGAAAGCGTGGGGAGCAAACAGGATTAGATACCCTGGTAGTCCAC  
GCTGTAAACGATGTCGATTTGGAGGTTGTGCCCTTGAGGCGTGGCTTCCGGAGCTAACGCGT  
TAAATCGACCGC  
>BSNB\_0592\_ *Klebsiella\_variicola*

GATTCATGGCTCAGATTGAACGCTGGCGGCAGGCCTAACACATGCAAGTCGAGCGGTAGCA  
CAGAGAGCTTGCTCTCGGGTGACGAGCGGCGGACGGGTGAGTAATGTCTGGGAACTGCCT  
GATGGAGGGGGATAACTACTGGAACGGTAGCTAATACCGCATAACGTCGCAAGACCAAA  
GTGGGGGACCTTCGGGCCTCATGCCATCAGATGTGCCCAGATGGGATTAGCTGGTAGGTGGG  
GTAACGGCTCACCTAGGCGACGATCCCTAGCTGGTCTGAGAGGATGACCAGCCACACTGGA  
ACTGAGACACGGTCCAGACTCCTACGGGAGGCAGCAGTGGGGAATATTGCACAATGGGCGC  
AAGCCTGATGCAGCCATGCCGCGTGTGTGAAGAAGGCCTTCGGGTTGTAAAGCACTTTCAGC  
GGGGAGGAAGGCGATAAGGTTAATAACCTCATCGATTGACGTTACCCGCAGAAGAAGCACC  
GGCTAACTCCGTGCCAGCAGCCGCGGTAATACGGAGGGTGCAAGCGTTAATCGGAATTACT  
GGGCGTAAAGCGCACGCAGGCGGTCTGTCAAGTCCGATGTGAAATCCCCGGGCTCAACCTG  
GGAAGTGCATTGCAAACTGGCAGGCTAGAGTCTTGTAGAGGGGGGTAGAATTCCAGGTGTA  
GCGGTGAAATGCGTAGAGATCTGGAGGAATACCGGTGGCGAAGGCGGCCCCCTGGACAAA  
GACTGACGCTCAGGTGCGAAAGCGTGGGGAGCAAACAGGATTAGATACCCTGGTAGTCCAC  
GCTGTAAACGATGTCGATTTGGAGGTTGTGCCCTTGAGGCGTGGCTTCCGGAGCTAACGCGT  
TAAATCGACCGC  
>BSNB\_0593\_ *Burkholderia\_tropica*

TCATGGCTCAGATTGAACGCTGGCGGCATGCCTTACACATGCAAGTCGAACGGCAGCACGG  
GTGCTTGACCTGGTGGCGAGTGGCGAACGGGTGAGTAATACATCGGAACGTGTCCTGTAGT  
GGGGGATAGCCCGGCGAAAGCCGGATTAATACCGCATACGATCTACGGATGAAAGCGGGG  
GATCTTCGGACCTCGCGCTATAGGGGCGGCCGATGGCGGATTAGCTAGTTGGTGAGGTA  
GGCTACCAAGGCGACGATCCGTAGCTGGTCTGAGAGGACGACCAGCCACACTGGGACTGA  
GACACGGCCCAGACTCCTACGGGAGGCAGCAGTGGGGAATTTTGGACAATGGGCGAAAGC  
CTGATCCAGCAATGCCGCGTGTGTGAAGAAGGCCTTCGGGTTGTAAAGCACTTTTGTCCGA  
AAGAAATCCTTGATCCTAATATGGTCGGGGGATGACGGTACCGGAAGAATAAGCACCGGCT  
AACTACGTGCCAGCAGCCGCGGTAATACGTAGGGTGCAAGCGTTAATCGGAATTACTGGGC  
GTAAAGCGTGCGCAGGCGGTGATGTAAGACCGATGTGAAATCCCCGGGCTCAACCTGGGAA  
CTGCATTGGTGACTGCATCGCTTGAATATGGCAGAGGGGGGTAGAATTCCACGTGTAGCAGT  
GAAATGCGTAGAGATGTGGAGGAATACCGATGGCGAAGGCAGCCCCCTGGGTCAATACTG  
ACGCTCATGCACGAAAGCGTGGGGAGCAAACAGGATTAGATACCCTGGTAGTCCACGCCCT  
AAACGATGTCAACTGGTTGTCGGGTCTTCATTGACTTGGTAAACGTAGCTAACGCGTGAAGTG  
ACCGCC

>BSNB\_0594\_ *Klebsiella\_variicola*

GATTCATGGCTCAGATTGAACGCTGGCGGCAGGCCTAACACATGCAAGTCGAGCGGTAGCA  
CAGAGAGCTTGCTCTCGGGTGACGAGCGGCGGACGGGTGAGTAATGTCTGGGAACTGCCT  
GATGGAGGGGGATAACTACTGGAACGGTAGCTAATACCGCATAACGTCGCAAGACCAAA  
GTGGGGGACCTTCGGGCCTCATGCCATCAGATGTGCCCAGATGGGATTAGCTGGTAGGTGGG  
GTAACGGCTCACCTAGGCGACGATCCCTAGCTGGTCTGAGAGGATGACCAGCCACACTGGA  
ACTGAGACACGGTCCAGACTCCTACGGGAGGCAGCAGTGGGGAATATTGCACAATGGGCGC  
AAGCCTGATGCAGCCATGCCGCGTGTGTGAAGAAGGCCTTCGGGTTGTAAAGCACTTTCAGC  
GGGGAGGAAGGCGATAAGGTTAATAACCTCATCGATTGACGTTACCCGCAGAAGAAGCACC  
GGCTAACTCCGTGCCAGCAGCCGCGGTAATACGGAGGGTGCAAGCGTTAATCGGAATTACT  
GGGCGTAAAGCGCACGCAGGCGGTCTGTCAAGTCCGATGTGAAATCCCCGGGCTCAACCTG  
GGAAGTGCATTGCAAACTGGCAGGCTAGAGTCTTGTAGAGGGGGGTAGAATTCCAGGTGTA  
GCGGTGAAATGCGTAGAGATCTGGAGGAATACCGGTGGCGAAGGCGGCCCCCTGGACAAA

GACTGACGCTCAGGTGCGAAAGCGTGGGGAGCAAACAGGATTAGATACCCTGGTAGTCCAC  
GCTGTAAACGATGTCGATTTGGAGGTTGTGCCCTTGAGGCGTGGCTTCCGGAGCTAACGCGT  
TAAATCGACCGC  
>BSNB\_0595\_ *Klebsiella\_variicola*

GATTCATGGCTCAGATTGAACGCTGGCGGCAGGCCTAACACATGCAAGTCGAGCGGTAGCA  
CAGAGAGCTTGCTCTCGGGTGACGAGCGGCGGACGGGTGAGTAATGTCTGGGAACTGCCT  
GATGGAGGGGGATAACTACTGGAACGGTAGCTAATACCGCATAACGTCGCAAGACCAAA  
GTGGGGGACCTTCGGGCCTCATGCCATCAGATGTGCCCAGATGGGATTAGCTGGTAGGTGGG  
GTAACGGCTCACCTAGGCGACGATCCCTAGCTGGTCTGAGAGGATGACCAGCCACACTGGA  
ACTGAGACACGGTCCAGACTCCTACGGGAGGCAGCAGTGGGGAATATTGCACAATGGGCGC  
AAGCCTGATGCAGCCATGCCGCGTGTGTGAAGAAGGCCTTCGGGTTGTAAAGCACTTTCAGC  
GGGGAGGAAGGCGATAAGGTTAATAACCTCATCGATTGACGTTACCCGCAGAAGAAGCACC  
GGCTAACTCCGTGCCAGCAGCCGCGGTAATACGGAGGGTGCAAGCGTTAATCGGAATTACT  
GGGCGTAAAGCGCACGCAGGCGGTCTGTCAAGTCGGATGTGAAATCCCCGGGCTCAACCTG  
GGAAGTGCATTGCAAAGTGGCAGGCTAGAGTCTTGTAGAGGGGGGTAGAATTCCAGGTGTA  
GCGGTGAAATGCGTAGAGATCTGGAGGAATACCGGTGGCGAAGGCGGCCCCCTGGACAAA  
GACTGACGCTCAGGTGCGAAAGCGTGGGGAGCAAACAGGATTAGATACCCTGGTAGTCCAC  
GCTGTAAACGATGTCGATTTGGAGGTTGTGCCCTTGAGGCGTGGCTTCCGGAGCTAACGCGT  
TAAATCGACCGC  
>BSNB\_0596\_ *Burkholderia\_plantarii*

ATTGAACGCTGGCGGCATGCCTTACACATGCAAGTCGAACGGCAGCACGGACTTCGGTCTG  
GTGGCGAGTGGCGAACGGGTGAGTAATACATCGGAACATGTCCTGTAGTGGGGGATAGCCC  
GGCGAAAGCCGGATTAATACCGCATAACGATCTACGGATGAAAGCGGGGGATCTTCGGACCT  
CGCGCTATAGGGTTGGCCGATGGCTGATTAGCTAGTTGGTAGGGTAAAAGCCTACCAAGGC  
GACGATCAGTAGCTGGTCTGAGAGGACGACCAGCCACACTGGGACTGAGACACGGCCCAG  
ACTCCTACGGGAGGCAGCAGTGGGGAATTTTGGACAATGGGCGAAAGCCTGATCCAGCAAT  
GCCGCGTGTGTGAAGAAGGCCTTCGGGTTGTAAAGCACTTTTGTCCGGAAAGAAATCCTGAG  
GGCTAATATCCTTCGGGGATGACGGTACCGGAAGAATAAGCACCGGCTAACTACGTGCCAG  
CAGCCGCGGTAATACGTAGGGTGCGAGCGTTAATCGGAATTACTGGGCGTAAAGCGTGCGC  
AGGCGGTTTGTAAAGACCGATGTGAAATCCCCGGGCTCAACCTGGGAACTGCATTGGTGACT  
GGCAAGCTAGAGTATGGCAGAGGGGGGTAGAATTCCACGTGTAGCAGTGAAATGCGTAGA  
GATGTGGAGGAATACCGATGGCGAAGGCAGCCCCCTGGGCCAATACTGACGCTCATGCACG  
AAAGCGTGGGGAGCAAACAGGATTAGATACCCTGGTAGTCCACGCCCTAAACGATGTCAAC  
TAGTTGTTGGGGATTCAATTCCTTAGTAACGTAGCTAACGCGTGAAGTGACCGC  
>BSNB\_0597\_ *Burkholderia\_plantarii*

ATTGAACGCTGGCGGCATGCCTTACACATGCAAGTCGAACGGCAGCACGGACTTCGGTCTG  
GTGGCGAGTGGCGAACGGGTGAGTAATACATCGGAACATGTCCTGTAGTGGGGGATAGCCC  
GGCGAAAGCCGGATTAATACCGCATAACGATCTACGGATGAAAGCGGGGGATCTTCGGACCT  
CGCGCTATAGGGTTGGCCGATGGCTGATTAGCTAGTTGGTAGGGTAAAAGCCTACCAAGGC  
GACGATCAGTAGCTGGTCTGAGAGGACGACCAGCCACACTGGGACTGAGACACGGCCCAG  
ACTCCTACGGGAGGCAGCAGTGGGGAATTTTGGACAATGGGCGAAAGCCTGATCCAGCAAT  
GCCGCGTGTGTGAAGAAGGCCTTCGGGTTGTAAAGCACTTTTGTCCGGAAAGAAATCCTGAG  
GGCTAATATCCTTCGGGGATGACGGTACCGGAAGAATAAGCACCGGCTAACTACGTGCCAG  
CAGCCGCGGTAATACGTAGGGTGCGAGCGTTAATCGGAATTACTGGGCGTAAAGCGTGCGC  
AGGCGGTTTGTAAAGACCGATGTGAAATCCCCGGGCTCAACCTGGGAACTGCATTGGTGACT  
GGCAAGCTAGAGTATGGCAGAGGGGGGTAGAATTCCACGTGTAGCAGTGAAATGCGTAGA  
GATGTGGAGGAATACCGATGGCGAAGGCAGCCCCCTGGGCCAATACTGACGCTCATGCACG

AAAGCGTGGGGAGCAAACAGGATTAGATACCCTGGTAGTCCACGCCCTAAACGATGTCAAC  
TAGTTGTTGGGGATTCAATTCCTTAGTAACGTAGCTAACGCGTGAAGTGACCGC

>BSNB\_0598\_ *Klebsiella\_variicola*

GATTCATGGCTCAGATTGAACGCTGGCGGCAGGCCTAACACATGCAAGTCGAGCGGTAGCA  
CAGAGAGCTTGCTCTCGGGTGACGAGCGGCGGACGGGTGAGTAATGTCTGGGAACTGCCT  
GATGGAGGGGGATAACTACTGGAAACGGTAGCTAATACCGCATAACGTCGCAAGACCAAA  
GTGGGGGACCTTCGGGCCTCATGCCATCAGATGTGCCCAGATGGGATTAGCTGGTAGGTGGG  
GTAACGGCTCACCTAGGCGACGATCCCTAGCTGGTCTGAGAGGATGACCAGCCACACTGGA  
ACTGAGACACGGTCCAGACTCCTACGGGAGGCAGCAGTGGGGAATATTGCACAATGGGCGC  
AAGCCTGATGCAGCCATGCCGCGTGTGTGAAGAAGGCCTTCGGGTTGTAAAGCACTTTCAGC  
GGGGAGGAAGGCGATAAGGTTAATAACCTCATCGATTGACGTTACCCGCAGAAGAAGCACC  
GGCTAACTCCGTGCCAGCAGCCGCGGTAATACGGAGGGTGCAAGCGTTAATCGGAATTACT  
GGGCGTAAAGCGCACGCAGGCGGTCTGTCAAGTCGGATGTGAAATCCCCGGGCTCAACCTG  
GGAAGTGCATTCGAAACTGGCAGGCTAGAGTCTTGTAGAGGGGGGTAGAATTCCAGGTGTA  
GCGGTGAAATGCGTAGAGATCTGGAGGAATACCGGTGGCGAAGGCGGCCCCCTGGACAAA  
GACTGACGCTCAGGTGCGAAAGCGTGGGGAGCAAACAGGATTAGATACCCTGGTAGTCCAC  
GCTGTAAACGATGTCGATTTGGAGGTTGTGCCCTTGAGGCGTGGCTTCCGGAGCTAACGCGT  
TAAATCGACCGC

>BSNB\_0616\_ *Burkholderia\_sp*

TTACGCGTTAGCTACGTTACTAAGGAAATGAATCCCCAACAACTAGTTGACATCGTTTAGG  
GCGTGGACTACCAGGGTATCTAATCCTGTTTGCTCCCCACGCTTTCGTGCATGAGCGTCAGTA  
TTGGCCCAGGGGGCTGCCTTCGCCATCGGTATTCCTCCACATCTCTACGCATTTCACTGCTAC  
ACGTGGAATTCTACCCCCCTCTGCCATACTCAAAGCCTGCCAGTCACCAATGCAGTTCCCAG  
GTTAAGCCCGGGGATTTACATCGGTCTTAACAGACCGCCTGCGCACGCTTTACGCCAGTA  
ATTCCGATTAACGCTCGCACCCCTACGTATTACCGCGGCTGCTGGCACGTAGTTAGCCGGTGC  
TTATTCTTCCGGTACCGTCATCCCACCACCATATTAGGGCGATGGTTTTCTTTCCGGACAAAA  
GTGCTTTACAACCCGAAGGCCTTCTTCACACACGCGGCATTGCTGGATCAGGGTTGCCCCA  
TTGTCCAAAATTCCCCACTGCTGCCTCCCGTAGGAGTCTGGGCCGTGTCTCAGTCCCAGTGTG  
GCTGGTCGTCTCTCAGACCAGCTACTGATCGTCGCCTTGGTAGGCCTTTACCCACCAACTA  
GCTAATCTGCCATCGGCCGCCCTGCAGCGCGAGGTCCGAAGATCCCCCGCTTTCTTCCGTA  
GATCGTATGCGGTATTAATCCGGCTTTCGCCGGGCTATCCCCCACTACAGGACAACGTTCCG  
ATGTATTACTACCCGTTT

>BSNB\_0617\_ *Burkholderia\_arvi*

ACTTCACGCGTTAGCTACGTTACTAAGGAAATGAATCCCCAACAACTAGTTGACATCGTTTA  
GGGCGTGGACTACCAGGGTATCTAATCCTGTTTGCTCCCCACGCTTTCGTGCATGAGCGTCA  
GTGTTGGCCCAGGGGGCTGCCTTCGCCATCGGTATTCCTCCACATCTCTACGCATTTCACTGC  
TACACGTGGAATTCTACCCCCCTCTGCCACACTCAAAGCCTGCCAGTCACCAATGCAGTTCC  
CAGGTAAAGCCCGGGGATTTACATCGGTCTTAACAGACCGCCTGCGCACGCTTTACGCCCA  
GTAATTCCGATTAACGCTCGCACCCCTACGTATTACCGCGGCTGCTGGCACGTAGTTAGCCGG  
TGCTTATTCTTCCGGTACCGTCATCCCTACGGATATTAGCCACGAGGTTTTCTTTCCGGACA  
AAAGTGCTTTACAACCCGAAGGCCTTCTTCACACACGCGGCATTGCTGGATCAGGGTTGCCC  
CCATTGTCCAAAATTCCCCACTGCTGCCTCCCGTAGGAGTCTGGGCCGTGTCTCAGTCCCAGT  
GTGGCTGGTCGTCTCTCAGACCAGCTACAGATCGTCGCCTTGGTAGGCCTTTACCCACCA  
ACTAGCTAATCTGCCATCGGCCGCCCTATAGCGCGAGGTCCGAAGATCCCCCGCTTTCTCC  
CTTAGGTCGTATGCGGTATTAATCCGGCTTTCGCCGGGCTATCCCCCACTACAGGACACGTTCC  
CGATGTATTACTACCCGTTTCGCCACTCGCCACCAGGGTTGCCCCCGTGTGCGGTTTCGACTT  
GCATGTGTAAGGCAT

>BSNB\_0618\_ *Bacillus\_cereus*

AAAGGCGGCTTCGGCTGTCACTTATGGATGGACCCGCGTCGCATTAGCTAGTTGGTGAGGTA  
ACGGCTCACCAAGGCAACGATGCGTAGCCGACCTGAGAGGGTGATCGGCCACACTGGGACT  
GAGACACGGCCCAGACTCCTACGGGAGGCAGCAGTAGGGAATCTTCCGCAATGGACGAAA  
GTCTGACGGAGCAACGCCGCGTGAGTGATGAAGGCTTTCGGGTCGTAAAACTCTGTTGTTAG  
GGAAGAACAAGTGCTAGTTGAATAAGCTGGCACCTTGACGGTACCTAACCAGAAAGGCCACG  
GCTAACTACGTGCCAGCAGCCGCGGTAATACGTAGGTGGCAAGCGTTATCCGGAATTATTG  
GGCGTAAAGCGCGCGCAGGTGGTTTCTTAAGTCTGATGTGAAAGCCCACGGCTCAACCGTG  
GAGGGTCATTGGAACTGGGAGACTTGAGTGCAGAAGAGGAAAGTGGAATTCATGTGTAG  
CGGTGAAATGCGTAGAGATATGGAGGAACACCAGTGGCGAAGGCGACTTCTGCTGTGTA  
CTGACACTGAGGCGCGAAAGCGTGGGGAGCAAACAGGATTAGATACCCTGGTAGTCCACGC  
CGTAAACGA

>BSNB\_0619\_ *Burkholderia\_sp*

CGTGGACTIONACCAGGGTATCTAATCCTGTTTGCTCCCCACGCTTTCGTGCATGAGCGTCAGTAT  
TGGCCCAGGGGGCTGCCTTCGCCATCGGGATTCTCCACATCTCTACGCATTTCACTGCTACA  
CGTGGAATTTACCCCCCTCTGCCATACTCAAAGCCTGCCAGTCACCAATGCAGTTCACAGG  
TTAGACCCGGGGATTTCACATCGGTCTTAACAAACCGCCTGCGCACGCTTTACGCCCAGTAA  
TTCCGATTAAACGCTCGCACCCCTACGTATTACCGCGGCTGCTGGCACGTAATTAGCCGGTGCTT  
ATTCTTCCGGTACCGTCATCCCACCACCATATTAGGGCGATGGTTTTCTTCCGGACAAAAGT  
GCTTTACAACCCGAAGGCCTTCTTACACACGCGGCATTGCTGGATCAGGGTTGCCCCATT  
GTCCAAAATTCCCCACTGCTGCCTCCCGTAGGAGTCTGGGCGGTGCTCTAGTCCCAGTGTGG  
CTGGTCGTCTCTCAGACCAGCTACAGATCGTCGCCTTGGTAGGCCTTTACCCCACCAACTA  
GCTAATCTGCCATCGGCCGCCCTGCAGCGCGAGGTCCGAAGATCCCCCGCTTCTTCCGTA  
GATCGTATGCGGTATTAATCCGGCTTTCGCCGGGCTATCCCCACTACAGGACACGTTCCGA  
TGTAATTACTACCCGTTTCGCCACTCGCCACCAGGGTTGCCCCCGTGCTGCCGTTTCGACTTGCA  
TGTGTAAGGCATGCCGCCAGCGTTCAATCTGAGCCATGAAT

>BSNB\_0626\_ *Burkholderia\_tropica*

CCAGGCGGTCACTTCACGCGTTAGCTACGTTACCAAGTCAATGAAGACCCGACAACCAAGTT  
GACATCGTTTTAGGGCGTGGACTIONACCAGGGTATCTAATCCTGTTTGCTCCCCACGCTTTCGTGC  
ATGAGCGTCAGTATTGACCCAGGGGGCTGCCTTCGCCATCGGTATTCCTCCACATCTCTACG  
CATTTCACTGCTACACGTGGAATTCTACCCCCCTCTGCCATACTCAAGCGATGCAGTCACCA  
ATGCAGTTCCCAGGTTGAGCCCGGGGATTTCACATCGGTCTTACATACCGCCTGCGCACGC  
TTTACGCCCAGTAATTCCGATTAAACGCTTGACCCCTACGTATTACCGCGGCTGCTGGCACGTA  
GTTAGCCGGTGCTTATTCTTCCGGTACCGTCATCCCCCGACCATATTAGGATCAAGGATTCT  
TTCCGGACAAAAGTGCTTTACAACCCGAAGGCCTTCTTACACACGCGGCATTGCTGGATCA  
GGCTTTCGCCATTGTCCAAAATTCCCCACTGCTGCCTCCCGTAGGAGTCTGGGCGGTGCTCTC  
AGTCCCAGTGTGGCTGGTCGTCCTCTCAGACCAGCTACGGATCGTCGCCTTGGTGAGCCTTTA  
CCTCACCAACTAGCTAATCCGCCATCGGCCGCCCTATAGCGCGAGGTCCGAAGATCCCCC  
GCTTTTATCCGTAGATCGTATGCGGTATTAATCCGGCTTTCGCCGGGCTATCCCCACTACAG  
GACACGTTCCGATGTATTACTACCCGTTTCGCCACTCGCCACCAGGTGCAAGCACCCGTGCT  
GCCGTTTCGACTTGCAATGTGTAAGGCATGCCGCCAGCGTTCAATCTGAGCCATGAATCA

>BSNB\_0630\_ *Burkholderia\_tropica*

CCAGGCGGTCACTTCACGCGTTAGCTACGTTACCAAGTCAATGAAGACCCGACAACCAAGTT  
GACATCGTTTTAGGGCGTGGACTIONACCAGGGTATCTAATCCTGTTTGCTCCCCACGCTTTCGTGC  
ATGAGCGTCAGTATTGACCCAGGGGGCTGCCTTCGCCATCGGTATTCCTCCACATCTCTACG

CATTTCACTGCTACACGTGGAATTCTACCCCCCTCTGCCATACTCAAGCGATGCAGTCACCA  
ATGCAGTTCCCAGGTTGAGCCCGGGGATTTACATCGGTCTTACATCACCGCCTGCGCACGC  
TTTACGCCCAGTAATTCCGATTAACGCTTGACCCTACGTATTACCGCGGCTGCTGGCACGTA  
GTTAGCCGGTGCTTATTCTTCCGGTACCGTCATCCCCCGACCATATTAGGATCAAGGATTTCT  
TTCCGGACAAAAGTGCTTTACAACCCGAAGGCCTTCTTACACACGCGGCATTGCTGGATCA  
GGCTTTCGCCCATTGTCCAAAATTCCCCACTGCTGCCTCCCGTAGGAGTCTGGGCCGTGTCTC  
AGTCCCAGTGTGGCTGGTCGTCCTCTCAGACCAGCTACGGATCGTCGCCTTGGTGAGCCTTTA  
CCTCACCAACTAGCTAATCCGCCATCGGCCGCCCCCTATAGCGCGAGGTCCGAAGATCCCCC  
GCTTTTCATCCGTAGATCGTATGCGGTATTAATCCGGCTTTCGCCGGGCTATCCCCACTACAG  
GACACGTTCCGATGTATTACTACCCGTTTCGCCACTCGCCACCAGGTGCAAGCACCCGTGCT  
GCCGTTTCGACTTGCATGTGTAAGGCATGCCGCCAGCGTTCAATCTGAGCCATGAATCA

>BSNB\_0632\_ Burkholderia\_tropica

CCAGGCGGTCACCTTACGCGTTAGCTACGTTACCAAGTCAATGAAGACCCGACAACCAGTT  
GACATCGTTTAGGGCGTGGAATACCAGGGTATCTAATCCTGTTTGCTCCCCACGCTTTCGTGC  
ATGAGCGTCAGTATTGACCCAGGGGGCTGCCTTCGCCATCGGTATTCTCCACATCTCTACG  
CATTTCACTGCTACACGTGGAATTCTACCCCCCTCTGCCATACTCAAGCGATGCAGTCACCA  
ATGCAGTTCCCAGGTTGAGCCCGGGGATTTACATCGGTCTTACATCACCGCCTGCGCACGC  
TTTACGCCCAGTAATTCCGATTAACGCTTGACCCTACGTATTACCGCGGCTGCTGGCACGTA  
GTTAGCCGGTGCTTATTCTTCCGGTACCGTCATCCCCCGACCATATTAGGATCAAGGATTTCT  
TTCCGGACAAAAGTGCTTTACAACCCGAAGGCCTTCTTACACACGCGGCATTGCTGGATCA  
GGCTTTCGCCCATTGTCCAAAATTCCCCACTGCTGCCTCCCGTAGGAGTCTGGGCCGTGTCTC  
AGTCCCAGTGTGGCTGGTCGTCCTCTCAGACCAGCTACGGATCGTCGCCTTGGTGAGCCTTTA  
CCTCACCAACTAGCTAATCCGCCATCGGCCGCCCCCTATAGCGCGAGGTCCGAAGATCCCCC  
GCTTTTCATCCGTAGATCGTATGCGGTATTAATCCGGCTTTCGCCGGGCTATCCCCACTACAG  
GACACGTTCCGATGTATTACTACCCGTTTCGCCACTCGCCACCAGGTGCAAGCACCCGTGCT  
GCCGTTTCGACTTGCATGTGTAAGGCATGCCGCCAGCGTTCAATCTGAGCCATGAATCA

>BSNB\_0635\_ Paraburkholderia\_guartelaensis

AACCAGTTGACATCGTTTAGGGCGTGGAATACCAGGGTATCTAATCCTGTTTGCTCCCCACG  
CTTTCGTGCATGAGCGTCAGTATTGGCCCAGGGGGCTGCCTTCGCCATCGGTATTCTCCACA  
TCTCTACGCATTTCACTGCTACACGTGGAATTCTACCCCCCTCTGCCATACTCCAGCGATGCA  
GTCACCAATGCAGTTCCCAGGTTAAGCCCGGGGATTTACATCGGTCTTACATCACCGCCTG  
CGCACGCTTTACGCCAGTAATTCCGATTAACGCTTGACCCTACGTATTACCGCGGCTGCTG  
GCACGTAGTTAGCCGGTGCTTATTCTTCCGGTACCGTCATCCCACCCGGATATTAGCCAGGC  
GGTTTTCTTCCGGACAAAAGTGCTTTACAACCCGAAGGCCTTCTTACACACGCGGCATTG  
CTGGATCAGGGTTGCCCCATTGTCCAAAATTCCCCACTGCTGCCTCCCGTAGGAGTCTGGG  
CCGTGTCTCAGTCCCAGTGTGGCTGGTCGTCCTCTCAGACCAGCTACGGATCGTCGCCTTGGT  
GGGCCTTTACCCACCAACTAGCTAATCCGCCATCGG

>BSNB\_0636\_ Burkholderia\_sp

CGGTCACTTACGCGTTAGCTACGTTACCAAGTCAATGAAGACCCGACAACCAGTTGACATC  
GTTTAGGGCGTGGAATACCAGGGTATCTAATCCTGTTTGCTCCCCACGCTTTCGTGCATGAGC  
GTCAGTATTGGCCCAGGGGGCTGCCTTCGCCATCGGTATTCTCCACATCTCTACGCATTTCA  
CTGCTACACGTGGAATTCTACCCCCCTCTGCCATACTCCAGCGATGCAGTCACCAATGCAGT  
TCCCAGGTTAAGCCCGGGGATTTACATCGGTCTTACATCACCGCCTGCGCACGCTTTACGC  
CCAGTAATTCCGATTAACGCTTGACCCTACGTATTACCGCGGCTGCTGGCACGTAGTTAGC  
CGGTGCTTATTCTTCCGGTACCGTCATCCCACCCGGATATTAGCCAGGCGGTTTTCTTCCGG  
ACAAAAGTGCTTTACAACCCGAAGGCCTTCTTACACACGCGGCATTGCTGGATCAGGGTTG  
CCCCATTGTCCAAAATTCCCCACTGCTGCCTCCCGTAGGAGTCTGGGCCGTGTCTCAGTCCC

AGTGTGGCTGGTCGTCCTCTCAGACCAGCTACGGATCGTCGCCTTGGTGGGCCTTTACCCAC  
CAACTAGCTAATCCGCCATCGGCCACCCCAATAGCGCGAGGTCTTTTCGATCCCCGCTTTCC  
TCCACAGAGCGTATGCGGTATTAATCCGGCTTTGCGCGGGCTATCCCCACTACTGGACATG  
TTCCGATGTATTACTCACCCGTTTCGCCACTCGCCACCAGGTGCAAGCACCCGTGCTGCCGTT  
GACTTGCATGTGTAAGGCATGCCGCCAGCGTTCAATCT

>BSNB\_0639\_ *Burkholderia\_tropica*

CCAGGCGGTCACTTCACGCGTTAGCTACGTTACCAAGTCAATGAAGACCCGACAACCAGTT  
GACATCGTTTAGGGCGTGGACTACCAGGGTATCTAATCCTGTTTGCTCCCCACGCTTTCGTGC  
ATGAGCGTCAGTATTGACCCAGGGGGCTGCCTTCGCCATCGGTATTCCTCCACATCTCTACG  
CATTTCACTGCTACACGTGGAATTCTACCCCCCTCTGCCATACTCAAGCGATGCAGTCACCA  
ATGCAGTTCCCAGGTTGAGCCCCGGGGATTTCACATCGGTCTTACATCACCGCCTGCGCACGC  
TTTACGCCCAGTAATTCCGATTAACGCTTGACCCCTACGTATTACCGCGGCTGCTGGCACGTA  
GTTAGCCGGTGCTTATTCTTCCGGTACCGTCATCCCCGACCATATTAGGATCAAGGATTTCT  
TTCCGGACAAAAGTGCTTTACAACCCGAAGGCCCTTCTTCACACACGCGGCATTGCTGGATCA  
GGCTTTCGCCCCATTGTCCAAAATTCCCCACTGCTGCCTCCCGTAGGAGTCTGGGCCGTGTCTC  
AGTCCCAGTGTGGCTGGTCGTCCTCTCAGACCAGCTACGGATCGTCGCCTTGGTGAGCCTTTA  
CCTCACCAACTAGCTAATCCGCCATCGGCCGCCCTATAGCGCGAGGTCCGAAGATCCCC  
GCTTTCATCCGTAGATCGTATGCGGTATTAATCCGGCTTTGCGCGGGCTATCCCCACTACAG  
GACACGTTCCGATGTATTACTCACCCGTTTCGCCACTCGCCACCAGGTGCAAGCACCCGTGCT  
GCCGTTGACTTGCATGTGTAAGGCATGCCGCCAGCGTTCAATCTGAGCCATGAATCA

>BSNB\_0640\_ *Burkholderia\_oxypbila*

CGGTCACCTTCACGCGTTAGCTACGTTACCAAGTCAATGAAGACCCGACAACCAGTTGACATC  
GTTTAGGGCGTGGACTACCAGGGTATCTAATCCTGTTTGCTCCCCACGCTTTCGTGCATGAGC  
GTCAGTATTGGCCCAGGGGGCTGCCTTCGCCATCGGTATTCCTCCACATCTCTACGCATTTCA  
CTGCTACACGTGGAATTCTACCCCCCTCTGCCATACTCCAGCGATGCAGTCACCAATGCAGT  
TCCCAGGTTAAGCCCCGGGGATTTCACATCGGTCTTACATCACCGCCTGCGCACGCTTTACGC  
CCAGTAATTCCGATTAACGCTTGACCCCTACGTATTACCGCGGCTGCTGGCACGTAGTTAGC  
CGGTGCTTATTCTTCCGGTACCGTCATCCCACCCGGATATTAGCCAGGCGGTTTTCTTTCCGG  
ACAAAAGTGCTTTACAACCCGAAGGCCCTTCTTCACACACGCGGCATTGCTGGATCAGGGTTG  
CCCCATTGTCCAAAATTCCCCACTGCTGCCTCCCGTAGGAGTCTGGGCCGTGTCTCAGTCCC  
AGTGTGGCTGGTCGTCCTCTCAGACCAGCTACGGATCGTCGCCTTGGTGGGCCTTTACCCAC  
CAACTAGCTAATCCGCCATCGGCCACCCCAATAGCGCGAGGTCTTTTCGATCCCCGCTTTCC  
TCCACAGAGCGTATGCGGTATTAATCCGGCTTTGCGCGGGCTATCCCCACTACTGGACATG  
TTCCGATGTATTACTCACCCGTTTCGCCACTCGCCACCAGGTGCAAGCACCCGTGCTGCCGTT  
GACTTGCATGTGTAAGGCATGCCGCCAGCGTTCAATCT

>BSNB\_0643\_ *Paenibacillus\_glucanolyticus*

GCGGATGCTTAATGTGTAACTTCGGCACCAAGGGTATCGAAACCCCTAACACCTAGCATTC  
ATCGTTTACGGCGTGGACTACCAGGGTATCTAATCCTGTTTGCTCCCCACGCTTTCGCGCCTC  
AGCGTCAGTTACAGCCCAGAGAGTCGCCTTCGCCACTGGTGTTCTCTCCACATATCTACGCAT  
TTCACCGCTACACGTGGAATTCCTCTCTCTCTGCACTCAAGTTCCCCAGTTTCCAGTGC  
GACCTGAAGTTGAGCCCCAGGTTTAAACACCAGACTTAAAGAACCGCCTGCGCGCGCTTTA  
CGCCCAATAATTCCGGACAACGCTTGCCCCCTACGTATTACCGCGGCTGCTGGCACGTAGTT  
AGCCGGGGCTTTCTTCTCAAGTACCGTCACTCTCATAGCAGTTACTCTATGAGACGTTCTTCC  
TTGGCAACAGAGCTTTACGATCCGAAAACCTTCATCACTCACGCGGCGTTGCTCCGTCAGGC  
TTTCGCCCCATTGCGGAAGATTCCCTACTGCTGCCCTCCCGTAGGAGTCTGGGCCGTGTCTCAGT  
CCCAGTGTGGCCGTTACCCCTCTCAGGTTCGGCTACGCATCGTCGCCTTGGTGGGCCGTTACCC

CACCAACTAGCTAATGCGCCGAGGCCCATCCCCAAGTGACAGATTGCTCCGTCTTTCATTA  
TCACATAATGCTATGTAATAAATTATCCGGTATTAGCTACCGTTTCCGGTAGTTATCCCAGTC  
TTGAGGGCAGGTTGCCTACGTGTTACTACCCGTCGCGCGCTAACTCTCAGGAGTGCAAGCA  
CTCCTTCAAGTCCGCTCGACTTGCATGTATTAGGCACGCCGCCAGCGTTCGT

>BSNB\_0648\_ *Bacillus\_sp*

CGGTCACTTCACGCGTTAGCTACGTTACCAAGTCAATGAAGACCCGACAACCAGTTGACATC  
GTTTAGGGCGTGGACTACCAGGGTATCTAATCCTGTTTGCTCCCCACGCTTTCGTGCATGAGC  
GTCAGTATTGGCCAGGGGGCTGCCTTCGCCATCGGTATTCCTCCACATCTCTACGCATTTCA  
CTGCTACACGTGGAATTCTACCCCCCTCTGCCATACTCCAGCGATGCAGTCACCAATGCAGT  
TCCCAGGTTAAGCCCGGGGATTTACATCGGTCTTACATCACCGCCTGCGCACGCTTTACGC  
CCAGTAATTCCGATTAACGCTTGACACCCTACGTATTACCGCGGCTGCTGGCACGTAGTTAGC  
CGGTGCTTATTCTTCCGGTACCGTCATCCCACCCGGATATTAGCCAGGCGGTTTTCTTTCCGG  
ACAAAAGTGCTTTACAACCCGAAGGCCTTCTTACACACGCGGCATTGCTGGATCAGGGTTG  
CCCCATTGTCCAAAATTCCCCACTGCTGCCTCCCGTAGGAGTCTGGGCGGTGTCTCAGTCCC  
AGTGTGGCTGGTCGTCCTCTCAGACCAGCTACGGATCGTCGCCTTGGTGGGCCTTTACCCAC  
CAACTAGCTAATCCGCCATCGGCCACCCAATAGCGCGAGGTCTTTCGATCCCCCGCTTTC  
TCCACAGAGCGTATGCGGTATTAATCCGGCTTTCGCCGGGCTATCCCCACTACTGGACATG  
TTCCGATGTATTACTACCCGTTTCGCCACTCGCCACCAGGTGCAAGCACCCGTGCTGCCGTT  
GACTTGCATGTGTAAGGCATGCCGCCAGCGTTCAATCT

>BSNB\_0656\_ *Burkholderia\_tropica*

CCAGGCGGTCACTTCACGCGTTAGCTACGTTACCAAGTCAATGAAGACCCGACAACCAGTT  
GACATCGTTTAGGGCGTGGACTACCAGGGTATCTAATCCTGTTTGCTCCCCACGCTTTCGTGC  
ATGAGCGTCAGTATTGACCCAGGGGGCTGCCTTCGCCATCGGTATTCCTCCACATCTCTACG  
CATTTCACTGCTACACGTGGAATTCTACCCCCCTCTGCCATACTCAAGCGATGCAGTCACCA  
ATGCAGTTCCCAGGTTGAGCCCGGGGATTTACATCGGTCTTACATCACCGCCTGCGCACGC  
TTTACGCCCAGTAATTCCGATTAACGCTTGACACCCTACGTATTACCGCGGCTGCTGGCACGTA  
GTTAGCCGGTGCTTATTCTTCCGGTACCGTCATCCCCGACCATATTAGGATCAAGGATTTCT  
TTCCGGACAAAAGTGCTTTACAACCCGAAGGCCTTCTTACACACGCGGCATTGCTGGATCA  
GGCTTTCGCCATTGTCCAAAATTCCCCACTGCTGCCTCCCGTAGGAGTCTGGGCGGTGTCTC  
AGTCCCAGTGTGGCTGGTCGTCCTCTCAGACCAGCTACGGATCGTCGCCTTGGTGAGCCTTTA  
CCTCACCAACTAGCTAATCCGCCATCGGCCGCCCCCTATAGCGCGAGGTCCGAAGATCCCC  
GCTTTCATCCGTAGATCGTATGCGGTATTAATCCGGCTTTCGCCGGGCTATCCCCACTACAG  
GACACGTTCCGATGTATTACTACCCGTTTCGCCACTCGCCACCAGGTGCAAGCACCCGTGCT  
GCCGTTTCGACTTGCATGTGTAAGGCATGCCGCCAGCGTTCAATCTGAGCCATGAATCA

>BSNB\_0658\_ *Burkholderia\_tropica*

CCAGGCGGTCACTTCACGCGTTAGCTACGTTACCAAGTCAATGAAGACCCGACAACCAGTT  
GACATCGTTTAGGGCGTGGACTACCAGGGTATCTAATCCTGTTTGCTCCCCACGCTTTCGTGC  
ATGAGCGTCAGTATTGACCCAGGGGGCTGCCTTCGCCATCGGTATTCCTCCACATCTCTACG  
CATTTCACTGCTACACGTGGAATTCTACCCCCCTCTGCCATACTCAAGCGATGCAGTCACCA  
ATGCAGTTCCCAGGTTGAGCCCGGGGATTTACATCGGTCTTACATCACCGCCTGCGCACGC  
TTTACGCCCAGTAATTCCGATTAACGCTTGACACCCTACGTATTACCGCGGCTGCTGGCACGTA  
GTTAGCCGGTGCTTATTCTTCCGGTACCGTCATCCCCGACCATATTAGGATCAAGGATTTCT  
TTCCGGACAAAAGTGCTTTACAACCCGAAGGCCTTCTTACACACGCGGCATTGCTGGATCA  
GGCTTTCGCCATTGTCCAAAATTCCCCACTGCTGCCTCCCGTAGGAGTCTGGGCGGTGTCTC  
AGTCCCAGTGTGGCTGGTCGTCCTCTCAGACCAGCTACGGATCGTCGCCTTGGTGAGCCTTTA  
CCTCACCAACTAGCTAATCCGCCATCGGCCGCCCCCTATAGCGCGAGGTCCGAAGATCCCC

GCTTTTCATCCGTAGATCGTATGCGGTATTAATCCGGCTTTCGCCGGGCTATCCCCACTACAG  
GACACGTTCCGATGTATTACTACCCGTTTCGCCACTCGCCACCAGGTGCAAGCACCCGTGCT  
GCCGTTGACTTGCATGTGTAAGGCATGCCGCCAGCGTTCAATCTGAGCCATGAATCA

>BSNB\_0659\_ *Bacillus\_subtilis*

GGCTCAGGACGAACGCTGGCGGCGTGCCTAATACATGCAAGTCGAGCGGACAGATGGGAG  
CTTGCTCCCTGATGTTAGCGGCGGACGGGTGAGTAACACGTGGGTAACTGCCTGTAAGACT  
GGGATAACTCCGGGAAACCGGGGCTAATACCGGATGGTTGTTTGAACCGCATGGTTCAAAC  
ATAAAAGGTGGCTTCGGCTACCACTTACAGATGGACCCGCGGCGCATTAGCTAGTTGGTGA  
GGTAACGGCTCACCAAGGCAACGATGCGTAGCCGACCTGAGAGGGTGATCGGCCACACTGG  
GACTGAGACACGGCCCAGACTCCTACGGGAGGCAGCAGTAGGGAATCTTCCGCAATGGAC  
GAAAGTCTGACGGAGCAACGCCGCGTGAGTGATGAAGGTTTTCCGGATCGTAAAGCTCTGTT  
GTTAGGGAAGAACAAGTACCGTTTCAATAGGGCGGTACCTTGACGGTACCTAACCAGAAAG  
CCACGGCTAACTACGTGCCAGCAGCCGCGGTAATACGTAGGTGGCAAGCGTTGTCCGGAAT  
TATTGGGCGTAAAGGGGCTCGCAGGCGGTTTCTTAAGTCTGATGTGAAAGCCCCCGGCTCAAC  
CGGGGAGGGTCATTGGAAACTGGGGAACCTTGAGTGCAGAAGAGGAGAGTGGAATTCCACG  
TGTAAGCGGTGAAATGCGTAGAGATGTGGAGGAACACCAGTGGCGAAGGCGACTCTCTGGTC  
TGTAAGTACGCTGAGGAGCGAAAGCGTGGGGAGCGAACAGGATTAGATACCCTGGTAGTC  
CACGCCGTAAACGATGAGTGCTAAGTGTTAGGGGGTTTCCGCCCCCTTAGTGCTGCAGCTAAC  
GCATTAAGCACTCCGCC

>BSNB\_0661\_ *Burkholderia\_tropica*

CCAGGCGGTCACTTCACGCGTTAGCTACGTTACCAAGTCAATGAAGACCCGACAACCAAGTT  
GACATCGTTTTAGGGCGTGGACTIONACCAGGGTATCTAATCCTGTTTGCTCCCCACGCTTTCGTGC  
ATGAGCGTCAGTATTGACCCAGGGGGCTGCCTTCGCCATCGGTATTCCTCCACATCTCTACG  
CATTTCACTGCTACACGTGGAATTCTACCCCCCTCTGCCATACTCAAGCGATGCAGTCACCA  
ATGCAGTTCCCAGGTTGAGCCCCGGGGATTTACATCGGTCTTACATCACCGCCTGCGCACGC  
TTTACGCCCAGTAATTCCGATTAACGCTTGACACCCTACGTATTACCGCGGCTGCTGGCACGTA  
GTTAGCCGGTGCTTATTCTTCCGGTACCGTCATCCCCCGACCATATTAGGATCAAGGATTTCT  
TTCCGGACAAAAGTGCTTTACAACCCGAAGGCCTTCTTACACACGCGGCATTGCTGGATCA  
GGCTTTCGCCCATTTGTCCAAAATTCCCCACTGCTGCCTCCCGTAGGAGTCTGGGCCGTGTCTC  
AGTCCCAGTGTGGCTGGTCCTCTCAGACCAGCTACGGATCGTCGCCTTGGTGAGCCTTTA  
CCTCACCAACTAGCTAATCCGCCATCGGCCGCCCTATAGCGCGAGGTCCGAAGATCCCCC  
GCTTTTCATCCGTAGATCGTATGCGGTATTAATCCGGCTTTCGCCGGGCTATCCCCACTACAG  
GACACGTTCCGATGTATTACTACCCGTTTCGCCACTCGCCACCAGGTGCAAGCACCCGTGCT  
GCCGTTGACTTGCATGTGTAAGGCATGCCGCCAGCGTTCAATCTGAGCCATGAATCA

>BSNB\_0663\_ *Burkholderia\_tropica*

CCAGGCGGTCACTTCACGCGTTAGCTACGTTACCAAGTCAATGAAGACCCGACAACCAAGTT  
GACATCGTTTTAGGGCGTGGACTIONACCAGGGTATCTAATCCTGTTTGCTCCCCACGCTTTCGTGC  
ATGAGCGTCAGTATTGACCCAGGGGGCTGCCTTCGCCATCGGTATTCCTCCACATCTCTACG  
CATTTCACTGCTACACGTGGAATTCTACCCCCCTCTGCCATACTCAAGCGATGCAGTCACCA  
ATGCAGTTCCCAGGTTGAGCCCCGGGGATTTACATCGGTCTTACATCACCGCCTGCGCACGC  
TTTACGCCCAGTAATTCCGATTAACGCTTGACACCCTACGTATTACCGCGGCTGCTGGCACGTA  
GTTAGCCGGTGCTTATTCTTCCGGTACCGTCATCCCCCGACCATATTAGGATCAAGGATTTCT  
TTCCGGACAAAAGTGCTTTACAACCCGAAGGCCTTCTTACACACGCGGCATTGCTGGATCA  
GGCTTTCGCCCATTTGTCCAAAATTCCCCACTGCTGCCTCCCGTAGGAGTCTGGGCCGTGTCTC  
AGTCCCAGTGTGGCTGGTCCTCTCAGACCAGCTACGGATCGTCGCCTTGGTGAGCCTTTA  
CCTCACCAACTAGCTAATCCGCCATCGGCCGCCCTATAGCGCGAGGTCCGAAGATCCCCC  
GCTTTTCATCCGTAGATCGTATGCGGTATTAATCCGGCTTTCGCCGGGCTATCCCCACTACAG



GACACGTTCCGATGTATTACTCACCCGTTCCGCCACTCGCCACCAGGTGCAAGCACCCGTGCT  
GCCGTTGACTTGATGTGTAAGGCATGCCGCCAGCGTTCAATCTGAGCCATGAATCA

>BSNB\_0669\_ *Enterobacter\_amnigenus*

GGCGGTCGACTTAACGCGTTAGCTCCGGAAGCCACGCCTCAAGGGCACAACCTCCAAGTCG  
ACATCGTTTACGGCGTGGACTACCAGGGTATCTAATCCTGTTTGCTCCCCACGCTTTCGCACC  
TGAGCGTCAGTCTTTGTCCAGGGGGCCGCCTTCGCCACCGGTATTCTCCAGATCTCTACGCA  
TTTACCCGCTACACCTGGAATTCTACCCCCCTCTACAAGACTCTAGCCTGCCAGTTTCGAATG  
CAGTTCCCAGGTTGAGCCCGGGGATTTACATCCGACTTGACAGACCGCCTGCGTGCGCTTT  
ACGCCCAGTAATTCCGATTAACGCTTGACCCCTCCGTATTACCGCGGCTGCTGGCACGGAGT  
TAGCCGGTGCTTCTTCTGCGGGTAACGTCAATTGCTGAGGTTATTAACCTCAACACCTTCCTC  
CCCGCTGAAAGTACTTTACAACCCGAAGGCCTTCTTCATACACGCGGCATGGCTGCATCAGG  
CTTGCGCCCATTTGTGCAATATTCCCCACTGCTGCCTCCCGTAGGAGTCTGGACCGTGTCTCAG  
TTCCAGTGTGGCTGGTCATCCTCTCAGACCAGCTAGGGATCGTCGCCTAGGTGAGCCGTTAC  
CCCACCTACTAGCTAATCCCATCTGGGCACATCTGATGGCAAGAGGCCCGAAGGTCCCCCTC  
TTTGGTCTTGCGACGTTATGCGGTATTAGCTACCGTTTCCAGTAGTTATCCCCCTCCATCAGG  
CAGTTTCCCAGACATTACTCACCCGTCCGCCGCTCGCCGGCAAAGTAGCAAGCTACTTTCCG  
CTGCCGCTCGACTTGATGTGTTAGGCCTGCCGCCAGCG

>BSNB\_0671\_ *Pantoea\_stewartii*

CTTAACGCGTTAGCTCCGGAAGCCACTCCTCAAGGGAACAACCTCCAAGTCGACATCGTTTA  
CGGCGTGGACTACCAGGGTATCTAATCCTGTTTGCTCCCCACGCTTTCGCACCTGAGCGTCA  
GTCTTCGTCCAGGGGGCCGCCTTCGCCACCGGTATTCTCCAGATCTCTACGCATTTACCCGC  
TACACCTGGAATTCTACCCCCCTCTACGAGACTCAAGCCTGCCAGTTTCAAATGCAGTTCCC  
AGGTTAAGCCCGGGGATTTACATCTGACTTAACAGACCGCCTGCGTGCGCTTTACGCCCAG  
TAATTCCGATTAACGCTTGACCCCTCCGTATTACCGCGGCTGCTGGCACGGAGTTAGCCGGT  
GCTTCTTCTGCGGGTAACGTCAATTGCTGAGGTTATTAACCTCAGCACCTTCCTCCCCGCTGA  
AAGTACTTTACAACCCGAAGGCCTTCTTCATACACGCGGCATGGCTGCATCAGGCTTGCGCC  
CATTGTGCAATATTCCCCACTGCTGCCTCCCGTAGGAGTCTGGACCGTGTCTCAGTTCCAGTG  
TGGCTGGTCATCCTCTCAGACCAGCTAGGGATCGTCGCCTAGGTGGGCCGTTACCCCGCCTA  
CCAGCTAATCCCATCTGGGCACATCCGATGGTGTGAGGCCCGAAGGTCCCCCACTTTGGTCT  
TGCGACGTTATGCGGTATTAGCTACCGTTTCCAGT

>BSNB\_0672\_ *Pantoea\_stewartii*

CTTAACGCGTTAGCTCCGGAAGCCACTCCTCAAGGGAACAACCTCCAAGTCGACATCGTTTA  
CGGCGTGGACTACCAGGGTATCTAATCCTGTTTGCTCCCCACGCTTTCGCACCTGAGCGTCA  
GTCTTCGTCCAGGGGGCCGCCTTCGCCACCGGTATTCTCCAGATCTCTACGCATTTACCCGC  
TACACCTGGAATTCTACCCCCCTCTACGAGACTCAAGCCTGCCAGTTTCAAATGCAGTTCCC  
AGGTTAAGCCCGGGGATTTACATCTGACTTAACAGACCGCCTGCGTGCGCTTTACGCCCAG  
TAATTCCGATTAACGCTTGACCCCTCCGTATTACCGCGGCTGCTGGCACGGAGTTAGCCGGT  
GCTTCTTCTGCGGGTAACGTCAATTGCTGAGGTTATTAACCTCAGCACCTTCCTCCCCGCTGA  
AAGTACTTTACAACCCGAAGGCCTTCTTCATACACGCGGCATGGCTGCATCAGGCTTGCGCC  
CATTGTGCAATATTCCCCACTGCTGCCTCCCGTAGGAGTCTGGACCGTGTCTCAGTTCCAGTG  
TGGCTGGTCATCCTCTCAGACCAGCTAGGGATCGTCGCCTAGGTGGGCCGTTACCCCGCCTA  
CCAGCTAATCCCATCTGGGCACATCCGATGGTGTGAGGCCCGAAGGTCCCCCACTTTGGTCT  
TGCGACGTTATGCGGTATTAGCTACCGTTTCCAGT

>BSNB\_0675\_ *Enterobacter\_mori*

GGCGGTCGACTTAACGCGTTAGCTCCGGAAGCCACGCCTCAAGGGCACAACCTCCAAGTCG  
ACATCGTTTACGGCGTGGACTACCAGGGTATCTAATCCTGTTTGCTCCCCACGCTTTCGCACC  
TGAGCGTCAGTCTTTGTCCAGGGGGCCGCTTCGCCACCGGTATTCTCCAGATCTCTACGCA  
TTTACCGCTACACCTGGAATTCTACCCCCCTCTACAAGACTCTAGCCTGCCAGTTTCGAATG  
CAGTTCCCAGGTTGAGCCCGGGGATTTACATCCGACTTGACAGACCGCCTGCGTGCGCTTT  
ACGCCCAGTAATTCCGATTAACGCTTGACCCCTCCGTATTACCGCGGCTGCTGGCACGGAGT  
TAGCCGGTGCTTCTTCTGCGGGTAACGTCAATTGCTGAGGTTATTAACCTCAACACCTTCCTC  
CCCGCTGAAAGTACTTTACAACCCGAAGGCCTTCTTCATACACGCGGCATGGCTGCATCAGG  
CTTGCGCCCATTTGTGCAATATTCCCCACTGCTGCCTCCCGTAGGAGTCTGGACCGTGTCTCAG  
TTCCAGTGTGGCTGGTCATCCTCTCAGACCAGCTAGGGATCGTCGCCTAGGTGAGCCGTTAC  
CCCACCTACTAGCTAATCCCATCTGGGCACATCTGATGGCAAGAGGCCCGAAGGTCCCCCTC  
TTTGGTCTTGCGACGTTATGCGGTATTAGCTACCGTTTCCAGTAGTTATCCCCCTCCATCAGG  
CAGTTTCCCAGACATTACTACCCGTCCGCGCTCGCCGCAAAGTAGCAAGCTACTTTCCG  
CTGCCGCTCGACTTGCATGTGTAGGCCTGCCGCCAGCG

>BSNB\_0683\_ *Bacillus\_subtilis*

CGGAGTGCTTAATGCGTTAGCTGCAGCACTAAGGGGCGGAAACCCCCTAACACTTAGCACT  
CATCGTTTACGGCGTGGACTACCAGGGTATCTAATCCTGTTGCTCCCCACGCTTTCGCTCCT  
CAGCGTCAGTTACAGACCAGAGAGTCGCCTTCGCCACTGGTGTTCTCCACATCTCTACGCA  
TTTACCGCTACACGTGGAATTCCACTCTCCTCTTCTGCACTCAAGTTCCCCAGTTTCCAATG  
ACCCTCCCCGGTTGAGCCGGGGGCTTTCACATCAGACTTAAGAAACCGCCTGCGAGCCCTTT  
ACGCCCAATAATTCCGGACAACGCTTGCCACCTACGTATTACCGCGGCTGCTGGCACGTAGT  
TAGCCGTGGCTTTCTGGTTAGGTACCGTCAAGGTACCGCCCTATTCTGAACGGTACTTGTTCTT  
CCCTAACAACAGAGCTTTACGATCCGAAAACCTTCATCACTCACGCGGCGTTGCTCCGTCAG  
ACTTTCTGCCATTGCGGAAGATTCCCTACTGCTGCCTCCCGTAGGAGTCTGGGCCGTGTCTCA  
GTCCCAGTGTGGCCGATCACCTCTCAGGTGGCTACGCATCGTTGCCTTGGTGAGCCGTTAC  
CTACCAACTAGCTAATGCGCCGCGGGTCCATCTGTAAGTGGTAGCCGAAGCCACCTTTTAT  
GTTTGAACCATGCGGTTCAAACAACCATCCGGTATTAGCCCCGGTTTCCCGGAGTTATCCCA  
GTCTTACAGGCAGGTTACCCACGTGTTACTACCCGTCCGCCGCTAACATCAGGGAGCAAGC  
TCCCATCTGTCCGCTCGACTTGCATGTATTAGGCACGCCGCCAGCGTTCGTC

>BSNB\_0685\_ *Bacillus\_subtilis*

CGGAGTGCTTAATGCGTTAGCTGCAGCACTAAGGGGCGGAAACCCCCTAACACTTAGCACT  
CATCGTTTACGGCGTGGACTACCAGGGTATCTAATCCTGTTGCTCCCCACGCTTTCGCTCCT  
CAGCGTCAGTTACAGACCAGAGAGTCGCCTTCGCCACTGGTGTTCTCCACATCTCTACGCA  
TTTACCGCTACACGTGGAATTCCACTCTCCTCTTCTGCACTCAAGTTCCCCAGTTTCCAATG  
ACCCTCCCCGGTTGAGCCGGGGGCTTTCACATCAGACTTAAGAAACCGCCTGCGAGCCCTTT  
ACGCCCAATAATTCCGGACAACGCTTGCCACCTACGTATTACCGCGGCTGCTGGCACGTAGT  
TAGCCGTGGCTTTCTGGTTAGGTACCGTCAAGGTACCGCCCTATTCTGAACGGTACTTGTTCTT  
CCCTAACAACAGAGCTTTACGATCCGAAAACCTTCATCACTCACGCGGCGTTGCTCCGTCAG  
ACTTTCTGCCATTGCGGAAGATTCCCTACTGCTGCCTCCCGTAGGAGTCTGGGCCGTGTCTCA  
GTCCCAGTGTGGCCGATCACCTCTCAGGTGGCTACGCATCGTTGCCTTGGTGAGCCGTTAC  
CTACCAACTAGCTAATGCGCCGCGGGTCCATCTGTAAGTGGTAGCCGAAGCCACCTTTTAT  
GTTTGAACCATGCGGTTCAAACAACCATCCGGTATTAGCCCCGGTTTCCCGGAGTTATCCCA  
GTCTTACAGGCAGGTTACCCACGTGTTACTACCCGTCCGCCGCTAACATCAGGGAGCAAGC  
TCCCATCTGTCCGCTCGACTTGCATGTATTAGGCACGCCGCCAGCGTTCGTC

>BSNB\_0704\_ *Stenotrophomonas\_maltophilia*

CAGGCGGCGAACTTAACGCGTTAGCTTCGATACTGCGTGCCAAATTGCACCCAACATCCATG

TTCGCATCGTTT TAGGGCGTGGACTACCAGGGTATCTAATCCTGTTTGCTCCCCACGCTTTCGT  
GCCTCAGTGTCAATGTTGGTCCAGGTAGCTGCCTTCGCCATGGATGTTCTCCTGATCTCTAC  
GCATTTCACTGCTACACCAGGAATTCGCTACCCTCTACCACATTCTAGTCATCCAGTATCCA  
CTGCAGTTCCCAGGTTGAGCCCAGGGCTTTCACAACGGACTTAAATAAACCACCTACGCACGC  
TTTACGCCCAGTAATTCCGAGTAACGCTTGACCCCTTCGTATTACCGCGGCTGCTGGCACGA  
AGTTAGCCGGTGCTTATTCTTTGGGTACCGTCATCCCAACCAGGTATTAACCGGCTGGATTTC  
TTCCCAACAAAAGGGCTTTACAACCCGAAGGCCTTCTTCACCCACGCGGTATGGCTGGATC  
AGGCTTGCGCCCATTTGTCCAATATTCCCCACTGCTGCCTCCCGTAGGAGTCTGGACCGTGTCT  
CAGTTCAGTGTGGCTGATCATCCTCTCAAACCAGCTACGGATCGTCGCCTTGGTGGGCCTTT  
ACCCCGCCAACTAGCTAATCCGACATCGGCTCATTCAATCGCGCAAGGTCCGAAGATCCCCT  
GCTTTCACCCGTAGGTCGTATGCG

>BSNB\_0706\_ Enterobacter\_mori

GGCGGTCGACTTAACGCGTTAGCTCCGGAAGCCACGCCTCAAGGGCACAACCTCCAAGTCG  
ACATCGTTTACGGCGTGGACTACCAGGGTATCTAATCCTGTTTGCTCCCCACGCTTTCGCACC  
TGAGCGTCAGTCTTTGTCCAGGGGGGCCCTTCGCCACCGGTATTCTCCAGATCTCTACGCA  
TTTCACCGCTACACCTGGAATTCTACCCCCCTCTACAAGACTCTAGCCTGCCAGTTTCGAATG  
CAGTTCACAGGTTGAGCCCGGGGATTTACATCCGACTTGACAGACCGCCTGCGTGCGCTTT  
ACGCCCAGTAATTCCGATTAACGCTTGACCCCTCCGTATTACCGCGGCTGCTGGCACGGAGT  
TAGCCGGTGCTTCTTCTGCGGGTAACGTCAATTGCTGAGGTTATTAACCTCAACACCTTCCTC  
CCCGCTGAAAGTACTTTACAACCCGAAGGCCTTCTTCATACACGCGGCATGGCTGCATCAGG  
CTTGCGCCCATTTGTGCAATATTCCCCACTGCTGCCTCCCGTAGGAGTCTGGACCGTGTCTCAG  
TTCCAGTGTGGCTGGTCATCCTCTCAGACCAGCTAGGGATCGTCGCCTAGGTGAGCCGTTAC  
CCCACCTACTAGCTAATCCCATCTGGGCACATCTGATGGCAAGAGGCCCGAAGGTCCCCCTC  
TTTGGTCTTGCGACGTTATGCGGTATTAGCTACCGTTTCCAGTAGTTATCCCCCTCCATCAGG  
CAGTTTCCAGACATTACTACCCGTCCGCGGCTCGCCGGCAAAGTAGCAAGCTACTTTCCG  
CTGCCGCTCGACTTGATGTGTTAGGCCTGCCGCCAGCG

>BSNB\_0708\_ Enterobacter\_mori

GGCGGTCGACTTAACGCGTTAGCTCCGGAAGCCACGCCTCAAGGGCACAACCTCCAAGTCG  
ACATCGTTTACGGCGTGGACTACCAGGGTATCTAATCCTGTTTGCTCCCCACGCTTTCGCACC  
TGAGCGTCAGTCTTTGTCCAGGGGGGCCCTTCGCCACCGGTATTCTCCAGATCTCTACGCA  
TTTCACCGCTACACCTGGAATTCTACCCCCCTCTACAAGACTCTAGCCTGCCAGTTTCGAATG  
CAGTTCACAGGTTGAGCCCGGGGATTTACATCCGACTTGACAGACCGCCTGCGTGCGCTTT  
ACGCCCAGTAATTCCGATTAACGCTTGACCCCTCCGTATTACCGCGGCTGCTGGCACGGAGT  
TAGCCGGTGCTTCTTCTGCGGGTAACGTCAATTGCTGAGGTTATTAACCTCAACACCTTCCTC  
CCCGCTGAAAGTACTTTACAACCCGAAGGCCTTCTTCATACACGCGGCATGGCTGCATCAGG  
CTTGCGCCCATTTGTGCAATATTCCCCACTGCTGCCTCCCGTAGGAGTCTGGACCGTGTCTCAG  
TTCCAGTGTGGCTGGTCATCCTCTCAGACCAGCTAGGGATCGTCGCCTAGGTGAGCCGTTAC  
CCCACCTACTAGCTAATCCCATCTGGGCACATCTGATGGCAAGAGGCCCGAAGGTCCCCCTC  
TTTGGTCTTGCGACGTTATGCGGTATTAGCTACCGTTTCCAGTAGTTATCCCCCTCCATCAGG  
CAGTTTCCAGACATTACTACCCGTCCGCGGCTCGCCGGCAAAGTAGCAAGCTACTTTCCG  
CTGCCGCTCGACTTGATGTGTTAGGCCTGCCGCCAGCG

>BSNB\_0709\_ Enterobacter\_mori

GGCGGTCGACTTAACGCGTTAGCTCCGGAAGCCACGCCTCAAGGGCACAACCTCCAAGTCG  
ACATCGTTTACGGCGTGGACTACCAGGGTATCTAATCCTGTTTGCTCCCCACGCTTTCGCACC  
TGAGCGTCAGTCTTTGTCCAGGGGGGCCCTTCGCCACCGGTATTCTCCAGATCTCTACGCA  
TTTCACCGCTACACCTGGAATTCTACCCCCCTCTACAAGACTCTAGCCTGCCAGTTTCGAATG

CAGTTCACAGGTTGAGCCCGGGGATTTACATCCGACTTGACAGACCGCCTGCGTGCGCTTT  
ACGCCAGTAATTCCGATTAACGCTTGACCCCTCCGTATTACCGCGGCTGCTGGCACGGAGT  
TAGCCGGTGCTTCTTCTGCGGGTAACGTCAATTGCTGAGGTTATTAACCTCAACACCTTCCTC  
CCCGCTGAAAGTACTTTACAACCCGAAGGCCTTCTTCATACACGCGGCATGGCTGCATCAGG  
CTTGCGCCCATTTGTGCAATATTCCCCACTGCTGCCTCCCGTAGGAGTCTGGACCGTGTCTCAG  
TTCCAGTGTGGCTGGTCATCCTCTCAGACCAGCTAGGGATCGTCGCCTAGGTGAGCCGTTAC  
CCCACCTACTAGCTAATCCCATCTGGGCACATCTGATGGCAAGAGGCCCGAAGGTCCCCCTC  
TTTGGTCTTGCGACGTTATGCGGTATTAGCTACCGTTTCCAGTAGTTATCCCCCTCCATCAGG  
CAGTTTCCAGACATTACTACCCGTCCGCCGCTCGCCGGCAAAGTAGCAAGCTACTTTCCG  
CTGCCGCTCGACTTGATGTGTTAGGCCTGCCGCCAGCG

>BSNB\_0712\_ *Bacillus\_subtilis*

GGCTCAGGACGAACGCTGGCGGCGTGCCTAATACATGCAAGTCGAGCGGACAGATGGGAG  
CTTGCTCCCTGATGTTAGCGGCGGACGGGTGAGTAACACGTGGGTAACCTGCCTGTAAGACT  
GGGATAACTCCGGGAAACCGGGGCTAATACCGGATGGTTGTTTGAACCGCATGGTTCAAAC  
ATAAAAGGTGGCTTCGGCTACCACTTACAGATGGACCCGCGGCGCATTAGCTAGTTGGTGA  
GGTAACGGCTCACCAAGGCAACGATGCGTAGCCGACCTGAGAGGGTGATCGGCCACACTGG  
GACTGAGACACGGCCCAGACTCCTACGGGAGGCAGCAGTAGGGAATCTTCCGCAATGGAC  
GAAAGTCTGACGGAGCAACGCCGCGTGAGTGATGAAGGTTTTTCGGATCGTAAAGCTCTGTT  
GTTAGGGAAGAACAAGTACCGTTCGAATAGGGCGGTACCTTGACGGTACCTAACCAGAAAG  
CCACGGCTAACTACGTGCCAGCAGCCGCGGTAATACGTAGGTGGCAAGCGTTGTCCGGAAT  
TATTGGGCGTAAAGGGCTCGCAGGCGGTTTCTTAAGTCTGATGTGAAAGCCCCCGGCTCAAC  
CGGGGAGGGTCATTGGAAACTGGGGAACCTTGAGTGCAGAAGAGGAGAGTGGAATTCCACG  
TGTAAGCGGTGAAATGCGTAGAGATGTGGAGGAACACCAGTGGCGAAGGCGACTCTCTGGTC  
TGTAAGTACGCTGAGGAGCGAAAGCGTGGGGAGCGAACAGGATTAGATACCCTGGTAGTC  
CACGCCGTAAACGATGAGTGCTAAGTGTTAGGGGTTTCCGCCCTTAGTGCTGCAGCTAAC  
GCATTAAGCACTCCGCC

>BSNB\_0716\_ *Bacillus\_subtilis*

CGGAGTGCTTAATGCGTTAGCTGCAGCACTAAGGGGCGGAAACCCCCTAACACTTAGCACT  
CATCGTTTACGGCGTGGACTACCAGGGTATCTAATCCTGTTTCGCTCCCCACGCTTTCGCTCCT  
CAGCGTCAGTTACAGACCAGAGAGTCGCCTTCGCCACTGGTGTTTCCTCCACATCTCTACGCA  
TTTACCGCTACACGTGGAATTCCACTCTCCTCTTCTGCACTCAAGTTCCCCAGTTTCCAATG  
ACCCTCCCCGGTTGAGCCGGGGGCTTTACATCAGACTTAAGAAACCGCCTGCGAGCCCTTT  
ACGCCCAATAATTCCGGACAACGCTTGCCACCTACGTATTACCGCGGCTGCTGGCACGTAGT  
TAGCCGTGGCTTTCTGGTTAGGTACCGTCAAGGTACCGCCCTATTCTGAACGGTACTTGTCTT  
CCCTAACAAACAGAGCTTTACGATCCGAAAACCTTCATCACTCACGCGGCGTTGCTCCGTCAG  
ACTTTCGTCCATTGCGGAAGATTCCCTACTGCTGCCTCCCGTAGGAGTCTGGGCCGTGTCTCA  
GTCCCAGTGTGGCCGATCACCTCTCAGGTCGGCTACGCATCGTTGCCTTGGTGAGCCGTTAC  
CTACCAACTAGCTAATGCGCCGCGGGTCCATCTGTAAGTGGTAGCCGAAGCCACCTTTTAT  
GTTTGAACCATGCGGTTCAAACAACCATCCGGTATTAGCCCCGGTTTCCCGGAGTTATCCCA  
GTCTTACAGGCAGGTTACCCACGTGTTACTACCCGTCCGCCGCTAACATCAGGGAGCAAGC  
TCCCATCTGTCCGCTCGACTTGATGTATTAGGCACGCCGCCAGCGTTCGTC

>BSNB\_0719\_ *Luteibacter\_yeojuensis*

GGCGAACTTAACGCGTTAGCTTCGACACTGATCTCCGAGTTGAGACCAACATCCAGTTGCA  
TCGTTTAGGGCGTGGACTACCAGGGTATCTAATCCTGTTTGCTCCCCACGCTTTCGTGCCTCA  
GCGTCAGTGTGATCCAGATGGCCGCCTTCGCCACTGATGTTCTCCCGATCTCTACGCATTT  
CACCGCTACACCGGGAATTCCACCATCCTCTATCACACTCTAGCTCGCCAGTATCCACTGCC  
ATTCCCAGGTTGAGCCCGGGGCTTTACAGCAGACTTAACGAACCGCCTACGCACGCTTTAC

GCCCAGTAATTCCGATTAACGCTTGCACCCTCCGTATTACCGCGGCTGCTGGCACGGAGTTA  
GCCGGTGCTTATTCTCAGGTACCGTCAGACTGCACGGGTATTAACCTTGCAGATTTCTGTTCC  
TGATAAAAGTGCTTTACAACCCGAGGGCCTTCTTCACACACGCGGTATTGCTGGATCAGGCT  
TGCGCCCATTTGTCCAATATTCCCCACTGCTGCCTCCCGTAGGAGTCTGGGCCGTGTCTCAGTC  
CCAGTGTGGCTGATCATCCTCTCAGACCAGCTAGCGATCGTCGCCTTGGTAAGCCATTACCTT  
ACCAACTAGCTAATCGCACATCGGTCCATCCAACCGCGCGAGGTCTTGCGATCCCCCGCTTT  
CTCCCGTAGGACGTATGCGGTATTAGCGTAAGTTTCCCTACGTTATCCCCCACGTCTGGGTAG  
GTCCCGATGCATTACTACCCGTCCGCCACTCGCCACCCATAGAGCAAGCTCTACCGTGCTG  
CCGTTGCACTTGCATGTGTTAAGCATACCGCCAGCGTTCAATC

>BSNB\_0721\_ *Luteibacter\_yejuensis*

GGCGAACTTAACGCGTTAGCTTCGACACTGATCTCCGAGTTGAGACCAACATCCAGTTCGCA  
TCGTTTAGGGCGTGGACTACCAGGGTATCTAATCCTGTTTGCTCCCCACGCTTTCGTGCCTCA  
GCGTCAGTGTGATCCAGATGGCCGCCTTCGCCACTGATGTTCTCCCGATCTCTACGCATTT  
CACCGCTACACCGGGAATTCACCATCCTCTATCACACTCTAGCTCGCCAGTATCCACTGCC  
ATTCCCAGGTTGAGCCCCGGGGCTTTCACAGCAGACTTAACGAACCGCCTACGCACGCTTAC  
GCCCAGTAATTCCGATTAACGCTTGCACCCTCCGTATTACCGCGGCTGCTGGCACGGAGTTA  
GCCGGTGCTTATTCTCAGGTACCGTCAGACTGCACGGGTATTAACCTTGCAGATTTCTGTTCC  
TGATAAAAGTGCTTTACAACCCGAGGGCCTTCTTCACACACGCGGTATTGCTGGATCAGGCT  
TGCGCCCATTTGTCCAATATTCCCCACTGCTGCCTCCCGTAGGAGTCTGGGCCGTGTCTCAGTC  
CCAGTGTGGCTGATCATCCTCTCAGACCAGCTAGCGATCGTCGCCTTGGTAAGCCATTACCTT  
ACCAACTAGCTAATCGCACATCGGTCCATCCAACCGCGCGAGGTCTTGCGATCCCCCGCTTT  
CTCCCGTAGGACGTATGCGGTATTAGCGTAAGTTTCCCTACGTTATCCCCCACGTCTGGGTAG  
GTCCCGATGCATTACTACCCGTCCGCCACTCGCCACCCATAGAGCAAGCTCTACCGTGCTG  
CCGTTGCACTTGCATGTGTTAAGCATACCGCCAGCGTTCAATC

>BSNB\_0722\_ *Bacillus\_subtilis*

GGCTCAGGACGAACGCTGGCGGCGTGCTAATACATGCAAGTCGAGCGGACAGATGGGAG  
CTTGCTCCCTGATGTTAGCGGCGGACGGGTGAGTAACACGTGGGTAACCTGCCTGTAAGACT  
GGGATAACTCCGGGAAACCGGGGCTAATACCGGATGGTTGTTTGAACCGCATGGTTCAAAC  
ATAAAAGGTGGCTTCGGCTACCACTTACAGATGGACCCGCGGCGCATTAGCTAGTTGGTGA  
GGTAACGGCTCACCAAGGCAACGATGCGTAGCCGACCTGAGAGGGTGATCGGCCACACTGG  
GACTGAGACACGGCCCAGACTCCTACGGGAGGCAGCAGTAGGGAATCTTCCGCAATGGAC  
GAAAGTCTGACGGAGCAACGCCGCGTGAGTGATGAAGGTTTTTCGGATCGTAAAGCTCTGTT  
GTTAGGGAAGAACAAGTACCGTTTCAATAGGGCGGTACCTTGACGGTACCTAACCAGAAAG  
CCACGGCTAACTACGTGCCAGCAGCCGCGGTAATACGTAGGTGGCAAGCGTTGTCCGGAAT  
TATTGGGCGTAAAGGGCTCGCAGGCGGTTTCTTAAGTCTGATGTGAAAGCCCCCGGCTCAAC  
CGGGGAGGGTCATTGGAACTGGGGAACTTGAGTGCAGAAGAGGAGAGTGGAATTCCACG  
TGTAGCGGTGAAATGCGTAGAGATGTGGAGGAACACCAGTGGCGAAGGCGACTCTCTGGTC  
TGTAAGTACGCTGAGGAGCGAAAGCGTGGGGAGCGAACAGGATTAGATACCCTGGTAGTC  
CACGCCGTAAACGATGAGTGCTAAGTGTTAGGGGGTTTCCGCCCCCTTAGTGCTGCAGCTAAC  
GCATTAAGCACTCCGCC

>BSNB\_0723\_ *Enterobacter\_mori*

GGCGGTCGACTTAACGCGTTAGCTCCGGAAGCCACGCCTCAAGGGCACAACCTCCAAGTCG  
ACATCGTTTACGGCGTGGACTACCAGGGTATCTAATCCTGTTTGCTCCCCACGCTTTCGCACC  
TGAGCGTCAGTCTTTGTCCAGGGGGCGCCTTCGCCACCGGTATTCCTCCAGATCTCTACGCA  
TTTACCCGCTACACCTGGAATTCTACCCCCCTCTACAAGACTCTAGCCTGCCAGTTTCGAATG  
CAGTTCCCAGGTTGAGCCCCGGGATTTACATCCGACTTGACAGACCGCCTGCGTGCGCTTT  
ACGCCAGTAATTCCGATTAACGCTTGCACCCTCCGTATTACCGCGGCTGCTGGCACGGAGT

TAGCCGGTGCTTCTTCTGCGGGTAACGTCAATTGCTGAGGTTATTAACCTCAACACCTTCCTC  
CCCGCTGAAAGTACTTTACAACCCGAAGGCCTTCTTCATACACGCGGCATGGCTGCATCAGG  
CTTGCGCCCATTTGTGCAATATTCCCCACTGCTGCCTCCCGTAGGAGTCTGGACCGTGTCTCAG  
TTCCAGTGTGGCTGGTCATCCTCTCAGACCAGCTAGGGATCGTCGCCTAGGTGAGCCGTTAC  
CCCACCTACTAGCTAATCCCATCTGGGCACATCTGATGGCAAGAGGCCCGAAGGTCCCCCTC  
TTTGGTCTTGCGACGTTATGCGGTATTAGCTACCGTTTCCAGTAGTTATCCCCCTCCATCAGG  
CAGTTTCCCAGACATTACTACCCGTCCGCGGCTCGCCGGCAAAGTAGCAAGCTACTTTCCG  
CTGCCGCTCGACTTGCATGTGTTAGGCCTGCCGCCAGCG

>BSNB\_0725\_ Enterobacter\_mori

GGCGGTCGACTTAACGCGTTAGCTCCGGAAGCCACGCCTCAAGGGCACAACCTCCAAGTCG  
ACATCGTTTACGGCGTGGACTACCAGGGTATCTAATCCTGTTTGCTCCCCACGTTTCGCACC  
TGAGCGTCAGTCTTTGTCCAGGGGGCCGCCTTCGCCACCGGTATTCTCCAGATCTCTACGCA  
TTTACCCGCTACACCTGGAATTCTACCCCCCTCTACAAGACTCTAGCCTGCCAGTTTCGAATG  
CAGTTCCCAGGTTGAGCCCGGGGATTTACATCCGACTTGACAGACCGCCTGCGTGCGCTTT  
ACGCCCAGTAATTCCGATTAACGCTTGACCCCTCCGTATTACCGCGGCTGCTGGCACGGAGT  
TAGCCGGTGCTTCTTCTGCGGGTAACGTCAATTGCTGAGGTTATTAACCTCAACACCTTCCTC  
CCCGCTGAAAGTACTTTACAACCCGAAGGCCTTCTTCATACACGCGGCATGGCTGCATCAGG  
CTTGCGCCCATTTGTGCAATATTCCCCACTGCTGCCTCCCGTAGGAGTCTGGACCGTGTCTCAG  
TTCCAGTGTGGCTGGTCATCCTCTCAGACCAGCTAGGGATCGTCGCCTAGGTGAGCCGTTAC  
CCCACCTACTAGCTAATCCCATCTGGGCACATCTGATGGCAAGAGGCCCGAAGGTCCCCCTC  
TTTGGTCTTGCGACGTTATGCGGTATTAGCTACCGTTTCCAGTAGTTATCCCCCTCCATCAGG  
CAGTTTCCCAGACATTACTACCCGTCCGCGGCTCGCCGGCAAAGTAGCAAGCTACTTTCCG  
CTGCCGCTCGACTTGCATGTGTTAGGCCTGCCGCCAGCG

>BSNB\_0726\_ Enterobacter\_mori

GGCGGTCGACTTAACGCGTTAGCTCCGGAAGCCACGCCTCAAGGGCACAACCTCCAAGTCG  
ACATCGTTTACGGCGTGGACTACCAGGGTATCTAATCCTGTTTGCTCCCCACGTTTCGCACC  
TGAGCGTCAGTCTTTGTCCAGGGGGCCGCCTTCGCCACCGGTATTCTCCAGATCTCTACGCA  
TTTACCCGCTACACCTGGAATTCTACCCCCCTCTACAAGACTCTAGCCTGCCAGTTTCGAATG  
CAGTTCCCAGGTTGAGCCCGGGGATTTACATCCGACTTGACAGACCGCCTGCGTGCGCTTT  
ACGCCCAGTAATTCCGATTAACGCTTGACCCCTCCGTATTACCGCGGCTGCTGGCACGGAGT  
TAGCCGGTGCTTCTTCTGCGGGTAACGTCAATTGCTGAGGTTATTAACCTCAACACCTTCCTC  
CCCGCTGAAAGTACTTTACAACCCGAAGGCCTTCTTCATACACGCGGCATGGCTGCATCAGG  
CTTGCGCCCATTTGTGCAATATTCCCCACTGCTGCCTCCCGTAGGAGTCTGGACCGTGTCTCAG  
TTCCAGTGTGGCTGGTCATCCTCTCAGACCAGCTAGGGATCGTCGCCTAGGTGAGCCGTTAC  
CCCACCTACTAGCTAATCCCATCTGGGCACATCTGATGGCAAGAGGCCCGAAGGTCCCCCTC  
TTTGGTCTTGCGACGTTATGCGGTATTAGCTACCGTTTCCAGTAGTTATCCCCCTCCATCAGG  
CAGTTTCCCAGACATTACTACCCGTCCGCGGCTCGCCGGCAAAGTAGCAAGCTACTTTCCG  
CTGCCGCTCGACTTGCATGTGTTAGGCCTGCCGCCAGCG

>BSNB\_0727\_ Enterobacter\_mori

GGCGGTCGACTTAACGCGTTAGCTCCGGAAGCCACGCCTCAAGGGCACAACCTCCAAGTCG  
ACATCGTTTACGGCGTGGACTACCAGGGTATCTAATCCTGTTTGCTCCCCACGTTTCGCACC  
TGAGCGTCAGTCTTTGTCCAGGGGGCCGCCTTCGCCACCGGTATTCTCCAGATCTCTACGCA  
TTTACCCGCTACACCTGGAATTCTACCCCCCTCTACAAGACTCTAGCCTGCCAGTTTCGAATG  
CAGTTCCCAGGTTGAGCCCGGGGATTTACATCCGACTTGACAGACCGCCTGCGTGCGCTTT  
ACGCCCAGTAATTCCGATTAACGCTTGACCCCTCCGTATTACCGCGGCTGCTGGCACGGAGT  
TAGCCGGTGCTTCTTCTGCGGGTAACGTCAATTGCTGAGGTTATTAACCTCAACACCTTCCTC

CCCGCTGAAAGTACTTTACAACCCGAAGGCCTTCTTCATACACGCGGCATGGCTGCATCAGG  
CTTGCGCCCATTTGTGCAATATTCCCCACTGCTGCCTCCCGTAGGAGTCTGGACCGTGTCTCAG  
TTCCAGTGTGGCTGGTCATCCTCTCAGACCAGCTAGGGATCGTCGCCTAGGTGAGCCGTTAC  
CCCACCTACTAGCTAATCCCATCTGGGCACATCTGATGGCAAGAGGCCCGAAGGTCCCCCTC  
TTTGGTCTTGCGACGTTATGCGGTATTAGCTACCGTTTCCAGTAGTTATCCCCCTCCATCAGG  
CAGTTTCCCAGACATTACTACCCGTCCGCCGCTCGCCGGCAAAGTAGCAAGCTACTTTCCG  
CTGCCGCTCGACTTGCATGTGTTAGGCCTGCCGCCAGCG

>BSNB\_0730\_ *Bacillus\_subtilis*

CGGAGTGCTTAATGCGTTAGCTGCAGCACTAAGGGGCGGAAACCCCCTAACACTTAGCACT  
CATCGTTTACGGCGTGGACTACCAGGGTATCTAATCCTGTTGCTCCCCACGCTTTCGCTCCT  
CAGCGTCAGTTACAGACCAGAGAGTCGCCTTCGCCACTGGTGTTCCTCCACATCTCTACGCA  
TTTCACCGCTACACGTGGAATTCCACTCTCCTCTTCTGCACTCAAGTTCCCCAGTTTCCAATG  
ACCCTCCCCGGTTGAGCCGGGGGCTTTCACATCAGACTTAAGAAACCGCCTGCGAGCCCTTT  
ACGCCCAATAATTCCGGACAACGCTTGCCACCTACGTATTACCGCGGCTGCTGGCACGTAGT  
TAGCCGTGGCTTTCTGGTTAGGTACCGTCAAGGTACCGCCCTATTCTGAACGGTACTTGTCTT  
CCCTAACAACAGAGCTTTACGATCCGAAAACCTTCATCACTCACGCGGCGTTGCTCCGTCAG  
ACTTTCGTCCATTGCGGAAGATTCCCTACTGCTGCCTCCCGTAGGAGTCTGGGCCGTGTCTCA  
GTCCCAGTGTGGCCGATCACCTCTCAGGTCGGCTACGCATCGTTGCCTTGGTGAGCCGTTAC  
CTACCAACTAGCTAATGCGCCGCGGGTCCATCTGTAAGTGGTAGCCGAAGCCACCTTTTAT  
GTTTGAACCATGCGGTTCAAACAACCATCCGGTATTAGCCCCGGTTTCCCGGAGTTATCCCA  
GTCTTACAGGCAGGTTACCCACGTGTTACTACCCGTCCGCCGCTAACATCAGGGAGCAAGC  
TCCCATCTGTCCGCTCGACTTGCATGTATTAGGCACGCCGCCAGCGTTTCGT

>BSNB\_0762\_ *Bacillus\_subtilis*

GGCTCAGGACGAACGCTGGCGGCGTGCCTAATACATGCAAGTCGAGCGGACAGATGGGAG  
CTTGCTCCCTGATGTTAGCGGCGGACGGGTGAGTAACACGTGGGTAACTGCCTGTAAGACT  
GGGATAACTCCGGGAAACCGGGGCTAATACCGGATGGTTGTTTGAACCGCATGGTTCAAAC  
ATAAAAGGTGGCTTCGGCTACCACTTACAGATGGACCCGCGGCGCATTAGCTAGTTGGTGA  
GGTAACGGCTACCAAGGCAACGATGCGTAGCCGACCTGAGAGGGTGATCGGCCACACTGG  
GACTGAGACACGGCCCAGACTCCTACGGGAGGCAGCAGTAGGGAATCTTCCGCAATGGAC  
GAAAGTCTGACGGAGCAACGCCGCGTGAGTGATGAAGGTTTTCCGGATCGTAAAGCTCTGTT  
GTTAGGGAAGAACAAGTACCGTTTCAATAGGGCGGTACCTTGACGGTACCTAACCAGAAAG  
CCACGGCTAACTACGTGCCAGCAGCCGCGTAATACGTAGGTGGCAAGCGTTGTCCGGAAT  
TATTGGGCGTAAAGGGCTCGCAGGCGGTTTCTTAAGTCTGATGTGAAAGCCCCCGGCTCAAC  
CGGGGAGGGTCATTGGAAACTGGGGAACCTTGAGTGCAGAAGAGGAGAGTGGAATTCCACG  
TGTAAGCGGTGAAATGCGTAGAGATGTGGAGGAACACCAGTGGCGAAGGCGACTCTCTGGTC  
TGTAAGTACGCTGAGGAGCGAAAGCGTGGGGAGCGAACAGGATTAGATACCCTGGTAGTC  
CACGCCGTAAACGATGAGTGCTAAGTGTTAGGGGGTTTCCGCCCTTAGTGCTGCAGCTAAC  
GCATTAAGCACTCCGCC

>BSNB\_0803\_ *Bacillus\_subtilis*

GGCTCAGGACGAACGCTGGCGGCGTGCCTAATACATGCAAGTCGAGCGGACAGATGGGAG  
CTTGCTCCCTGATGTTAGCGGCGGACGGGTGAGTAACACGTGGGTAACTGCCTGTAAGACT  
GGGATAACTCCGGGAAACCGGGGCTAATACCGGATGGTTGTTTGAACCGCATGGTTCAAAC  
ATAAAAGGTGGCTTCGGCTACCACTTACAGATGGACCCGCGGCGCATTAGCTAGTTGGTGA  
GGTAACGGCTACCAAGGCAACGATGCGTAGCCGACCTGAGAGGGTGATCGGCCACACTGG  
GACTGAGACACGGCCCAGACTCCTACGGGAGGCAGCAGTAGGGAATCTTCCGCAATGGAC  
GAAAGTCTGACGGAGCAACGCCGCGTGAGTGATGAAGGTTTTCCGGATCGTAAAGCTCTGTT  
GTTAGGGAAGAACAAGTACCGTTTCAATAGGGCGGTACCTTGACGGTACCTAACCAGAAAG

CCACGGCTAACTACGTGCCAGCAGCCGCGGTAATACGTAGGTGGCAAGCGTTGTCCGGAAT  
TATTGGGCGTAAAGGGGCTCGCAGGCGGTTTCTTAAGTCTGATGTGAAAGCCCCCGGCTCAAC  
CGGGGAGGGTCATTGGAAACTGGGGAACCTTGAGTGCAGAAGAGGAGAGTGGAATTCCACG  
TGTAAGCGGTGAAATGCGTAGAGATGTGGAGGAACACCAGTGGCGAAGGCGACTCTCTGGTC  
TGTAAGTACGCTGAGGAGCGAAAGCGTGGGGAGCGAACAGGATTAGATACCCTGGTAGTC  
CACGCCGTAAACGATGAGTGCTAAGTGTTAGGGGGTTTCCGCCCCCTTAGTGCTGCAGCTAAC  
GCATTAAGCACTCCGCC

>BSNB\_0804\_ *Bacillus\_subtilis*

GGCTCAGGACGAACGCTGGCGGCGTGCCTAATACATGCAAGTCGAGCGGACAGATGGGAG  
CTTGCTCCCTGATGTTAGCGGCGGACGGGTGAGTAACACGTGGGTAACTGCCTGTAAGACT  
GGGATAACTCCGGGAAACCGGGGCTAATACCGGATGGTTGTTTGAACCGCATGGTTCAAAC  
ATAAAAGGTGGCTTCGGCTACCACTTACAGATGGACCCGCGGCGCATTAGCTAGTTGGTGA  
GGTAACGGCTCACCAAGGCAACGATGCGTAGCCGACCTGAGAGGGTGATCGGCCACACTGG  
GACTGAGACACGGCCCAGACTCCTACGGGAGGCAGCAGTAGGGAATCTTCCGCAATGGAC  
GAAAGTCTGACGGAGCAACGCCGCGTGAGTGATGAAGGTTTTCCGGATCGTAAAGCTCTGTT  
GTTAGGGAAGAACAAGTACCGTTCGAATAGGGCGGTACCTTGACGGTACCTAACCAGAAAG  
CCACGGCTAACTACGTGCCAGCAGCCGCGGTAATACGTAGGTGGCAAGCGTTGTCCGGAAT  
TATTGGGCGTAAAGGGGCTCGCAGGCGGTTTCTTAAGTCTGATGTGAAAGCCCCCGGCTCAAC  
CGGGGAGGGTCATTGGAAACTGGGGAACCTTGAGTGCAGAAGAGGAGAGTGGAATTCCACG  
TGTAAGCGGTGAAATGCGTAGAGATGTGGAGGAACACCAGTGGCGAAGGCGACTCTCTGGTC  
TGTAAGTACGCTGAGGAGCGAAAGCGTGGGGAGCGAACAGGATTAGATACCCTGGTAGTC  
CACGCCGTAAACGATGAGTGCTAAGTGTTAGGGGGTTTCCGCCCCCTTAGTGCTGCAGCTAAC  
GCATTAAGCACTCCGCC

>BSNB\_0805\_ *Methylobacterium\_mesophilicum*

CCGGATACGCCCTTTTGGGGAAAGGTTTACTGCCGGAAGATCGGCCCGCGTCTGATTAGCTA  
GTTGGTGGGGTAACGGCCTACCAAGGCGACGATCAGTAGCTGGTCTGAGAGGATGATCAGC  
CACACTGGGACTGAGACACGGCCCAGACTCCTACGGGAGGCAGCAGTGGGGAATATTGGA  
CAATGGGCGCAAGCCTGATCCAGCCATGCCGCGTGAGTGATGAAGGCCTTAGGGTTGTAAA  
GCTCTTTTATCCGGGACGATAATGACGGTACCGGAGGAATAAGCCCCGGCTAACTTCGTGCC  
AGCAGCCGCGGTAATACGAAGGGGGCTAGCGTTGCTCGGAATCACTGGGCGTAAAGGGCGC  
GTAGGCGGCGTTTTAAGTCGGGGGTGAAAGCCTGTGGCTCAACCACAGAATGGCCTTCGAT  
ACTGGGACGCTTGAGTATGGTAGAGGTTGGTGGAAGTGCAGTGTAGAGGTGAAATTCGTA  
GATATTCGAAGAACACCGGTGGCGAAGGCGGCCAACTGGACCATTACTGACGCTGAGGCG  
CGAAAGCGTGGGGAGCAAACAGGATTAGATACCCTGGTAGTCCACGCCGTAAACGATGAAT  
GCCAGCTGTTGGGGTGCTTGACCGCAGTAGCGCAGCTAACGCTTTGAGCATCCGCC

>BSNB\_0816\_ *Bacillus\_subtilis*

GGCTCAGGACGAACGCTGGCGGCGTGCCTAATACATGCAAGTCGAGCGGACAGATGGGAG  
CTTGCTCCCTGATGTTAGCGGCGGACGGGTGAGTAACACGTGGGTAACTGCCTGTAAGACT  
GGGATAACTCCGGGAAACCGGGGCTAATACCGGATGGTTGTTTGAACCGCATGGTTCAAAC  
ATAAAAGGTGGCTTCGGCTACCACTTACAGATGGACCCGCGGCGCATTAGCTAGTTGGTGA  
GGTAACGGCTCACCAAGGCAACGATGCGTAGCCGACCTGAGAGGGTGATCGGCCACACTGG  
GACTGAGACACGGCCCAGACTCCTACGGGAGGCAGCAGTAGGGAATCTTCCGCAATGGAC  
GAAAGTCTGACGGAGCAACGCCGCGTGAGTGATGAAGGTTTTCCGGATCGTAAAGCTCTGTT  
GTTAGGGAAGAACAAGTACCGTTCGAATAGGGCGGTACCTTGACGGTACCTAACCAGAAAG  
CCACGGCTAACTACGTGCCAGCAGCCGCGGTAATACGTAGGTGGCAAGCGTTGTCCGGAAT  
TATTGGGCGTAAAGGGGCTCGCAGGCGGTTTCTTAAGTCTGATGTGAAAGCCCCCGGCTCAAC  
CGGGGAGGGTCATTGGAAACTGGGGAACCTTGAGTGCAGAAGAGGAGAGTGGAATTCCACG  
TGTAAGCGGTGAAATGCGTAGAGATGTGGAGGAACACCAGTGGCGAAGGCGACTCTCTGGTC



TGTAAGTACGCTGAGGAGCGAAAGCGTGGGGAGCGAACAGGATTAGATACCCTGGTAGTC  
CACGCCGTAAACGATGAGTGCTAAGTGTTAGGGGGTTTCCGCCCCCTTAGTGCTGCAGCTAAC  
GCATTAAGCACTCCGCC  
>BSNB\_0817\_ Bacillus\_subtilis

GGCTCAGGACGAACGCTGGCGGCGTGCCTAATACATGCAAGTCGAGCGGACAGATGGGAG  
CTTGCTCCCTGATGTTAGCGGCGGACGGGTGAGTAACACGTGGGTAACTGCCTGTAAGACT  
GGGATAACTCCGGGAAACCGGGGCTAATACCGGATGGTTGTTTGAACCGCATGGTTCAAAC  
ATAAAAGGTGGCTTCGGCTACCACTTACAGATGGACCCGCGGCGCATTAGCTAGTTGGTGA  
GGTAACGGCTCACCAAGGCAACGATGCGTAGCCGACCTGAGAGGGTGATCGGCCACACTGG  
GACTGAGACACGGCCCAGACTCCTACGGGAGGCAGCAGTAGGGAATCTTCCGCAATGGAC  
GAAAGTCTGACGGAGCAACGCCGCGTGAGTGATGAAGGTTTTCCGATCGTAAAGCTCTGTT  
GTTAGGGAAGAACAAGTACCGTTTCAATAGGGCGGTACCTTGACGGTACCTAACCAGAAAAG  
CCACGGCTAACTACGTGCCAGCAGCCGCGGTAATACGTAGGTGGCAAGCGTTGTCCGGAAT  
TATTGGGCGTAAAGGGGCTCGCAGGCGGTTTCTTAAGTCTGATGTGAAAGCCCCCGGCTCAAC  
CGGGGAGGGTCATTGGAAACTGGGGAACCTTGAGTGCAAGAGAGGAGAGTGGAATTCCACG  
TGTAAGCGGTGAAATGCGTAGAGATGTGGAGGAACACCAGTGGCGAAGGCGACTCTCTGGTC  
TGTAAGTACGCTGAGGAGCGAAAGCGTGGGGAGCGAACAGGATTAGATACCCTGGTAGTC  
CACGCCGTAAACGATGAGTGCTAAGTGTTAGGGGGTTTCCGCCCCCTTAGTGCTGCAGCTAAC  
GCATTAAGCACTCCGCC  
>BSNB\_0955\_ Bacillus\_subtilis

GGCTCAGGACGAACGCTGGCGGCGTGCCTAATACATGCAAGTCGAGCGGACAGATGGGAG  
CTTGCTCCCTGATGTTAGCGGCGGACGGGTGAGTAACACGTGGGTAACTGCCTGTAAGACT  
GGGATAACTCCGGGAAACCGGGGCTAATACCGGATGGTTGTTTGAACCGCATGGTTCAAAC  
ATAAAAGGTGGCTTCGGCTACCACTTACAGATGGACCCGCGGCGCATTAGCTAGTTGGTGA  
GGTAACGGCTCACCAAGGCAACGATGCGTAGCCGACCTGAGAGGGTGATCGGCCACACTGG  
GACTGAGACACGGCCCAGACTCCTACGGGAGGCAGCAGTAGGGAATCTTCCGCAATGGAC  
GAAAGTCTGACGGAGCAACGCCGCGTGAGTGATGAAGGTTTTCCGATCGTAAAGCTCTGTT  
GTTAGGGAAGAACAAGTACCGTTTCAATAGGGCGGTACCTTGACGGTACCTAACCAGAAAAG  
CCACGGCTAACTACGTGCCAGCAGCCGCGGTAATACGTAGGTGGCAAGCGTTGTCCGGAAT  
TATTGGGCGTAAAGGGGCTCGCAGGCGGTTTCTTAAGTCTGATGTGAAAGCCCCCGGCTCAAC  
CGGGGAGGGTCATTGGAAACTGGGGAACCTTGAGTGCAAGAGAGGAGAGTGGAATTCCACG  
TGTAAGCGGTGAAATGCGTAGAGATGTGGAGGAACACCAGTGGCGAAGGCGACTCTCTGGTC  
TGTAAGTACGCTGAGGAGCGAAAGCGTGGGGAGCGAACAGGATTAGATACCCTGGTAGTC  
CACGCCGTAAACGATGAGTGCTAAGTGTTAGGGGGTTTCCGCCCCCTTAGTGCTGCAGCTAAC  
GCATTAAGCACTCCGCC  
>BSNB\_0956\_ Bacillus\_subtilis

GGCTCAGGACGAACGCTGGCGGCGTGCCTAATACATGCAAGTCGAGCGGACAGATGGGAG  
CTTGCTCCCTGATGTTAGCGGCGGACGGGTGAGTAACACGTGGGTAACTGCCTGTAAGACT  
GGGATAACTCCGGGAAACCGGGGCTAATACCGGATGGTTGTTTGAACCGCATGGTTCAAAC  
ATAAAAGGTGGCTTCGGCTACCACTTACAGATGGACCCGCGGCGCATTAGCTAGTTGGTGA  
GGTAACGGCTCACCAAGGCAACGATGCGTAGCCGACCTGAGAGGGTGATCGGCCACACTGG  
GACTGAGACACGGCCCAGACTCCTACGGGAGGCAGCAGTAGGGAATCTTCCGCAATGGAC  
GAAAGTCTGACGGAGCAACGCCGCGTGAGTGATGAAGGTTTTCCGATCGTAAAGCTCTGTT  
GTTAGGGAAGAACAAGTACCGTTTCAATAGGGCGGTACCTTGACGGTACCTAACCAGAAAAG  
CCACGGCTAACTACGTGCCAGCAGCCGCGGTAATACGTAGGTGGCAAGCGTTGTCCGGAAT  
TATTGGGCGTAAAGGGGCTCGCAGGCGGTTTCTTAAGTCTGATGTGAAAGCCCCCGGCTCAAC  
CGGGGAGGGTCATTGGAAACTGGGGAACCTTGAGTGCAAGAGAGGAGAGTGGAATTCCACG  
TGTAAGCGGTGAAATGCGTAGAGATGTGGAGGAACACCAGTGGCGAAGGCGACTCTCTGGTC

TGTAAGTACGCTGAGGAGCGAAAGCGTGGGGAGCGAACAGGATTAGATACCCTGGTAGTC  
CACGCCGTAAACGATGAGTGCTAAGTGTTAGGGGGTTTCCGCCCCCTTAGTGCTGCAGCTAAC  
GCATTAAGCACTCCGCC  
>BSNB\_0959\_ *Bacillus\_subtilis*

GGCTCAGGACGAACGCTGGCGGCGTGCCTAATACATGCAAGTCGAGCGGACAGATGGGAG  
CTTGCTCCCTGATGTTAGCGGCGGACGGGTGAGTAACACGTGGGTAACTGCCTGTAAGACT  
GGGATAACTCCGGGAAACCGGGGCTAATACCGGATGGTTGTTTGAACCGCATGGTTCAAAC  
ATAAAAGGTGGCTTCGGCTACCACTTACAGATGGACCCGCGGCGCATTAGCTAGTTGGTGA  
GGTAACGGCTCACCAAGGCAACGATGCGTAGCCGACCTGAGAGGGTGATCGGCCACACTGG  
GACTGAGACACGGCCCAGACTCCTACGGGAGGCAGCAGTAGGGAATCTTCCGCAATGGAC  
GAAAGTCTGACGGAGCAACGCCGCGTGAGTGATGAAGGTTTTCCGATCGTAAAGCTCTGTT  
GTTAGGGAAGAACAAGTACCGTTTCAATAGGGCGGTACCTTGACGGTACCTAACCAGAAAAG  
CCACGGCTAACTACGTGCCAGCAGCCGCGTAATACGTAGGTGGCAAGCGTTGTCCGGAAT  
TATTGGGCGTAAAGGGCTCGCAGGCGGTTTCTTAAGTCTGATGTGAAAGCCCCCGGCTCAAC  
CGGGGAGGGTCATTGGAACTGGGGAACTTGAGTGCAAGAGGAGAGTGGAATTCCACG  
TGAGCGGTGAAATGCGTAGAGATGTGGAGGAACACCAGTGGCGAAGGCGACTCTCTGGTC  
TGTAAGTACGCTGAGGAGCGAAAGCGTGGGGAGCGAACAGGATTAGATACCCTGGTAGTC  
CACGCCGTAAACGATGAGTGCTAAGTGTTAGGGGGTTTCCGCCCCCTTAGTGCTGCAGCTAAC  
GCATTAAGCACTCCGCC  
>BSNB\_0978\_ *Acidisoma\_sp*

AGAATAAGCCCCGGATAACTTTGTGCCAGCAGCCGCGTAATACGAAGGGGGCTAGCGTTG  
CTCGGAATGATTGGGTGTAAAGGGCGCGTAGGCGGCGGCCAAAGTCAGGCGTGAAATTCCT  
GGGCTCAACCTGGGGGCTGCGCTTGATACTTGTTGCTTGAGTGGGGAAGAGGGTCGTGGA  
ATTCCAGTGTAGAGGTGAAATTCGTAGATATTGGGAAGAACACCGGTGGCGAAGGCGGCG  
ACCTGGTCCTTGACTGACGCTGAGGCGCGAAAGCGTGGGGAGCAAACAGGATTAGATACCC  
TGGTAGTCCACGCTGTAAACGATGTGTGCTGGATGTTGGGTGACTTAGTCACTCAGTGTGCTA  
GCTAACGCGATAAGCATCA

>BSNB\_1020\_ *Burkholderia\_tropica*

CCAGGCGGTCACTTCACGCGTTAGCTACGTTACCAAGTCAATGAAGACCCGACAACCAGTT  
GACATCGTTTAGGGCGTGGACTACCAGGGTATCTAATCCTGTTTGCTCCCCACGCTTTCGTGC  
ATGAGCGTCAGTATTGACCCAGGGGGCTGCCTTCGCCATCGGTATTCCTCCACATCTCTACG  
CATTTCACTGCTACACGTGGAATTCTACCCCCCTCTGCCATACTCAAGCGATGCAGTCACCA  
ATGCAGTTCCCAGGTTGAGCCCCGGGGATTTCACATCGGTCTTACATCACCGCCTGCGCACGC  
TTTACGCCCAGTAATTCCGATTAACGCTTGACCCCTACGTATTACCGCGGCTGCTGGCACGTA  
GTTAGCCGGTGCTTATTCTTCCGGTACCGTCATCCCCGACCATATTAGGATCAAGGATTTCT  
TTCCGGACAAAAGTGCTTTACAACCCGAAGGCCTTCTTCACACACGCGGCATTGCTGGATCA  
GGCTTTCGCCCCATTGTCCAAAATTCCCCACTGCTGCCTCCCGTAGGAGTCTGGGCCGTGTCTC  
AGTCCCAGTGTGGCTGGTCCTCTCAGACCAGCTACGGATCGTCGCCTTGGTGAGCCTTTA  
CCTCACCAACTAGCTAATCCGCCATCGGCCGCCCTATAGCGCGAGGTCCGAAGATCCCCC  
GCTTTTATCCGTAGATCGTATGCGGTATTAATCCGGCTTTCGCCGGGCTATCCCCACTACAG  
GACACGTTCCGATGTATTACTACCCGTTTCGCCACTCGCCACCAGGTGCAAGCACCCGTGCT  
GCCGTTGACTTGATGTGTAAGGCATGCCGCCAGCGTTCAATCTGAGCCATGAATCA

>BSNB\_1022\_ *Methylobacterium\_populi*

CCCCTATCTTCCGGTMCGTCAATTATCGTCCCGGACAAAAGAGCTTTACAACCCTAAGGCCTT  
CATCACTACGCGGCATGGCTGGATCAGGCTTGCGCCCATTTGTCCAATATTTCCCACTGCTG

CCTCCCGTAGGAGTCTGGGCCGTGTCTCAGTCCCAGTGTGGCTGATCATCCTCTCAGACCAG  
CTACTGATCGTCGCCTTGGTAGGCCGTTACCCACCAACAAGCTAATCAGACGCGGGCCGAT  
CCTTCGGCAGTAAACCTTTCCCCATAAGGGCGTATCCGGTATTAGCTCAAGTTTCCCTGAGTT  
ATTCCGAACCGAAGGGCACGTTCCACGTGTTACTACCCGTCTGCCACTGACTTCCGAAGA  
AGCCCGTTCGACTTGATGTGTTAAGCCTGCCGCCAGCGTTCGCTCTGAGCCAGGATCAAAC  
TCTA

>BSNB\_1023\_ *Curtobacterium\_sp*

CTTCTTTCTGCAGGTACGTCACTTTCGCTTCTTCCCTACTAAAAGAGGTTTACAACCCGAAGG  
CCGTCATCCCTCACGCGGCGTTGCTGCATCAGGCTTTCGCCCATTTGTGCAATATCCCCACTG  
CTGCCTCCCGTAGGAGTCTGGGCCGTGTCTCAGTCCCAGTGTGGCCGGTACCCCTCTCAGGC  
CGGCTACCCGTCGTCGCCTTGGTGAGCCATTACCTACCAACAAGCTGATAGGCCGCGAGTC  
CATCCCCAACCAAAAAATCTTTCCACCACCAGACCATGCGGCCGGCAGTCCTATCCAGTATT  
AGACGTTCGTTTCCAACGCTTATCCCAGAGTCAAGGGCAGGTTACTCACGTGTTACTACCCG  
TTCGCCACTAATCCACCCAGCAAGCTGGGCATCATCGTTTCGACTTGATGTGTTAAGCACGC  
CGCCAGCGTTCGTCTGAGCCAGGTYAAAACTCTA

>BSNB\_1024\_ *Pantoea\_dispersa*

GGTCGGTCTCTCTGCGGGTAACGTCAATCGGCGAGGTTATTAACCTCACCGCCTTCTCCCCG  
CTGAAAGTACTTTACAACCCGAAGGCCTTCTTCATACACGCGGCATGGCTGCATCAGGCTTG  
CGCCCATTTGTGCAATATCCCCACTGCTGCCTCCCGTAGGAGTCTGGACCGTGTCTCAGTTCC  
AGTGTGGCTGGTCATCCTCTCAGACCAGCTAGGGATCGTCGCCTAGGTGAGCCATTACCCCA  
CCTACTAGCTAATCCCATCTGGGCACATCCGATGGTGTGAGGCCCCGAAGGTCCCCCACTTTG  
GTCTTGCGACGTTATGCGGTATTAGCTACCGTTTCCAGTAGTTATCCCCCTCCATCGGGCAGT  
TTCCCAGACATTACTACCCGTCCGCCACTCGCCACCCAAAGAGCAAGCTCTTCTGTGCTGC  
CGTTTCGACTTGATGTGTTAGGCCTGCCGCCAGCGTTCAATATGAGCCAGGTYAAAACTC  
TA

>BSNB\_1025\_ *Bacillus\_megaterium*

ATCGTGCTTCTGGTAGGTACCGTCAAGGTACGAGCAGTTACTCTCGTACTTGTTCTTCCCTAA  
CAACAGAGTTTTACGACCCGAAAGCCTTCATCACTACGCGGCGTTGCTCCGTCAGACTTTC  
GTCCATTGCGGAAGATTCCCTACTGCTGCCTCCCGTAGGAGTCTGGGCCGTGTCTCAGTCCC  
AGTGTGGCCGATCACCTCTCAGGTCGGCTATGCATCGTTGCCTTGGTGAGCCGTTACCTCAC  
CAACTAGCTAATGCACCGCGGGCCCATCTGTAAGTGATAGCCGAAACCATCTTTCAATCATC  
TCCCATGAAGGAGAAGATCCTATCCGGTATTAGCTTCGGTTTCCCGAAGTTATCCAGTCTTA  
CAGGCAGGTTGCCACGTGTTACTACCCGTCCGCCGCTAACGTCATAGAAGCAAGCTTCTA  
ATCAGTTCGCTCGACTTGATGTATTAGGCACGCCGCCAGCGTTCATCCTGAGCCAGGTYMA  
AAACTCTA

>BSNB\_1026\_ *Methylobacterium\_sp*

CTCTCCTATCTCGGTACGTCAATTATCGTCCCGGATAAAAGAGCTTTACAACCCTAAGGCCTTC  
ATCACTACGCGGCATGGCTGGATCAGGCTTGCGCCCATTTGTCCAATATTCCCCACTGCTGC  
CTCCCGTAGGAGTCTGGGCCGTGTCTCAGTCCCAGTGTGGCTGATCATCCTCTCAGACCAGC  
TACTGATCGTCGCCTTGGTAGGCCGTTACCCACCAACTAGCTAATCAGACGCGGGGCCGATC  
TTCCGGCAGTAAACCTTTCCCCATAAGGGCGTATCCGGTATTAGCCCTAGTTTCCCAGGGTTA  
TTCCGAACCGGAAGGCACGTTCCACGCGTACTACCCGTCCGCCGCTGACCCCGAAGGG  
CCCGCTCGACTTGATGTGTTAAGCCTGCCGCCAGCGTTCGCTCTGAGCCAGGATCAAACCTC  
TAA

>BSNB\_1027\_ *Asaia\_sp*

GTCTGGCTCTTCTACGGGTACCGTCATCATCGTCCCCGTCGAAAGTGCTTTACAATCCGAAG  
ACCTTCTTCACACACGCGGCATTGCTGGATCAGGCTTTCGCCCATTTGTCCAATATTCCCCACT  
GCTGCCTCCCGTAGGAGTCTGGGCCGTGTCTCAGTCCCAGTGTGGCTGATCATCCTCTCAGAC  
CAGCTATCGATCATCGCCTTGGTAGGCCTTTACCCACCAACAAGCTAATCGAACGCAGGCT  
CCTCCACAGGCGACTTGCGCCTTTGACCCTCAGGTATCATGCGGTATTAGCACCAGTTTCCCG  
ATGTTATCCCCACCCGTGGATAGATCCCTACGCGATACTCACCCGTCCGCCACTCACCCCG  
AAGGGTCCGTGCGACTTGCAATGTGTTAAGCATGCCGCCAGCGTTTCGCTCTGAGCCAGATCAA  
AACTCTA

>BSNB\_1030\_ *Pseudomonas\_sp*

CTTATTCTGTCGGTACGTCAAAACTCACAGGTATTTCGCTGTAAGCCCTTCCTCCCAACTTAAA  
GTGCTTTACGACCCGARGGCCTTCTTCACACACGCGGCATGGCTGGATCAGGCTTTCGCCCA  
TTGTCCAATATTCCCCACTGCTGCCTCCCGTAGGAGTCTGGACCGTGTCTCAGTTCAGTGTG  
ACTGATCATCCTCTCAGACCAGTTACGGATCGTCGCCTTGGTAGGCCTTTACCTACCAACTA  
GCTAATCCGACCTAGGCTCATCTAATAGCGTGAGGTCCGAAGATCCCCCACTTTCTCCCGTA  
GGACGTATGCGGTATTAGCGTTCCTTTCGAAACGTTGTCCCCCACTACTAGGCAGATTCCCTAG  
GCATTACTCACCCGTCCGCCGCTGAATCGARGAGCAAGCTCCTCTCATCCGCTCGACTTGCA  
TGTGTTAGGCCTGCCGCCAGCGTTCAATCTRAGCCAGGATCAAAACTCTA

>BSNB\_1032\_ *Arthrobacter\_sp*

CCGGCCTCTTCTGCAGGTACCGTCACTTTCGCTTCTTCCCTACTGAAAGAGGTTTACAACCCG  
AAGGCCGTCATCCCTCACGCGCGTCGCTGCATCAGGCTTGCGCCCATTTGTGCAATATTCCC  
CACTGCTGCCTCCCGTAGGAGTCTGGGCCGTGTCTCAGTCCCAGTGTGGCCGGTCACCCTCTC  
AGGCCGGCTACCCGTGCTCGCCTTGGTAGGCCATTACCCACCAACAAGCTGATAGGCCGC  
GAGTCCATCCAAAACCACAAAAGCTTTCACCACCATGACATGCGCCAGATGGTCGTATCC  
GGTATTAGACCCAGTTTCCCAGGCTTATCCAGAGTCAAGGGCAGGTTACTCACGTGTTACT  
CACCCGTTCCGCACTAATCCCCCAGCAAGCTGGGATCATCGTTCGACTTGCAATGTGTTAAGC  
ACGCCGCCAGCGTTCATCCTGAGCCAGGATCAAACTCTA

>BSNB\_1034\_ *Pantoea\_agglomerans*

GGGTGCGGGGCTCTTCTGCGGGTACGTATCGACASGGTTATTAACCCCRTCGCCTTCCTCCC  
CGCTGAAAGTACTTTACAACCCGAAGGCCTTCTTCATACACGCGGCATGGCTGCATCAGGCT  
TGCGCCCATTTGTGCAATATTCCCCACTGCTGCCTCCCGTAGGAGTCTGGACCGTGTCTCAGTT  
CCAGTGTGGCTGGTCATCCTCTCAGACCAGCTAGGGATCGTCGCCTAGGTGGGCCATTACCC  
CGCCTACTAGCTAATCCCATCTGGGTTTCATCCGATAGTGAGAGGCCCGAAGGTCCCCCTCTT  
TGGTCTTGCGACGTTATGCGGTATTAGCCACCGTTTCCAGTGGTTATCCCCCTCTATCGGGCA  
GATCCCCAGACATTACTCACCCGTCCGCCACTCGTCACCCAAGRRCMAGCTYTCTSTGCKAC  
CGYCCSACWTGCACGTGTKAGGCSTGCCSCCMSCGTTCAAWMTSAGMCMMSGGCAAAAAMTC  
TSAAAA

>BSNB\_1116\_ *Methylobacterium\_mesophilicum*

CCGGATACGCCCTTTTGGGGAAAGGTTTACTGCCGGAAGATCGGCCCGCGTCTGATTAGCTA  
GTTGGTGGGGTAACGGCCTACCAAGGCGACGATCAGTAGCTGGTCTGAGAGGATGATCAGC  
CACACTGGGACTGAGACACGGCCCAGACTCCTACGGGAGGCAGCAGTGGGGAATATTGGA  
CAATGGGCGCAAGCCTGATCCAGCCATGCCGCGTGAGTGATGAAGGCCTTAGGGTTGTAAA  
GCTCTTTTATCCGGGACGATAATGACGGTACCGGAGGAATAAGCCCCGGCTAACTTCGTGCC  
AGCAGCCGCGGTAATACGAAGGGGGTACGCTTGCTCGGAATCACTGGGCGTAAAGGGCGC  
GTAGGCGGCGTTTTAAGTCGGGGGTGAAAGCCTGTGGCTCAACCACAGAATGGCCTTCGAT  
ACTGGGACGCTTGAGTATGGTAGAGGTTGGTGGAACTGCGAGTGTAGAGGTGAAATTCGTA  
GATATTCGCAAGAACACCGGTGGCGAAGGCGGCCAACTGGACCATTACTGACGCTGAGGCG

CGAAAGCGTGGGGAGCAAACAGGATTAGATACCCTGGTAGTCCACGCCGTAAACGATGAAT  
GCCAGCTGTTGGGGTGCTTGACCCGCAGTAGCGCAGCTAACGCTTTGAGCATCCGCC

>BSNB\_1123\_ *Methylobacterium\_mesophilicum*

CCGGATACGCCCTTTTGGGGAAAGGTTTACTGCCGGAAGATCGGCCCCGCGTCTGATTAGCTA  
GTTGGTGGGGTAACGGCCTACCAAGGCGACGATCAGTAGCTGGTCTGAGAGGATGATCAGC  
CACACTGGGACTGAGACACGGCCCAGACTCCTACGGGAGGCAGCAGTGGGGAATATTGGA  
CAATGGGCGCAAGCCTGATCCAGCCATGCCGCGTGAGTGATGAAGGCCTTAGGGTTGTAAA  
GCTCTTTTATCCGGGACGATAATGACGGTACCGGAGGAATAAGCCCCGGCTAACTTCGTGCC  
AGCAGCCGCGGTAATACGAAGGGGGCTAGCGTTGCTCGGAATCACTGGGCGTAAAGGGGCG  
GTAGGCGGCGTTTTAAGTCGGGGGTGAAAGCCTGTGGCTCAACCACAGAATGGCCTTCGAT  
ACTGGGACGCTTGAGTATGGTAGAGGTTGGTGGAACTGCGAGTGTAGAGGTGAAATTCGTA  
GATATTCGCAAGAACACCGGTGGCGAAGGCGGCCAACTGGACCATTACTGACGCTGAGGCG  
CGAAAGCGTGGGGAGCAAACAGGATTAGATACCCTGGTAGTCCACGCCGTAAACGATGAAT  
GCCAGCTGTTGGGGTGCTTGACCCGCAGTAGCGCAGCTAACGCTTTGAGCATCCGCC

>BSNB\_1136\_ *Methylobacterium\_mesophilicum*

CCGGATACGCCCTTTTGGGGAAAGGTTTACTGCCGGAAGATCGGCCCCGCGTCTGATTAGCTA  
GTTGGTGGGGTAACGGCCTACCAAGGCGACGATCAGTAGCTGGTCTGAGAGGATGATCAGC  
CACACTGGGACTGAGACACGGCCCAGACTCCTACGGGAGGCAGCAGTGGGGAATATTGGA  
CAATGGGCGCAAGCCTGATCCAGCCATGCCGCGTGAGTGATGAAGGCCTTAGGGTTGTAAA  
GCTCTTTTATCCGGGACGATAATGACGGTACCGGAGGAATAAGCCCCGGCTAACTTCGTGCC  
AGCAGCCGCGGTAATACGAAGGGGGCTAGCGTTGCTCGGAATCACTGGGCGTAAAGGGGCG  
GTAGGCGGCGTTTTAAGTCGGGGGTGAAAGCCTGTGGCTCAACCACAGAATGGCCTTCGAT  
ACTGGGACGCTTGAGTATGGTAGAGGTTGGTGGAACTGCGAGTGTAGAGGTGAAATTCGTA  
GATATTCGCAAGAACACCGGTGGCGAAGGCGGCCAACTGGACCATTACTGACGCTGAGGCG  
CGAAAGCGTGGGGAGCAAACAGGATTAGATACCCTGGTAGTCCACGCCGTAAACGATGAAT  
GCCAGCTGTTGGGGTGCTTGACCCGCAGTAGCGCAGCTAACGCTTTGAGCATCCGCC

>BSNB\_1137\_ *Methylobacterium\_mesophilicum*

CCGGATACGCCCTTTTGGGGAAAGGTTTACTGCCGGAAGATCGGCCCCGCGTCTGATTAGCTA  
GTTGGTGGGGTAACGGCCTACCAAGGCGACGATCAGTAGCTGGTCTGAGAGGATGATCAGC  
CACACTGGGACTGAGACACGGCCCAGACTCCTACGGGAGGCAGCAGTGGGGAATATTGGA  
CAATGGGCGCAAGCCTGATCCAGCCATGCCGCGTGAGTGATGAAGGCCTTAGGGTTGTAAA  
GCTCTTTTATCCGGGACGATAATGACGGTACCGGAGGAATAAGCCCCGGCTAACTTCGTGCC  
AGCAGCCGCGGTAATACGAAGGGGGCTAGCGTTGCTCGGAATCACTGGGCGTAAAGGGGCG  
GTAGGCGGCGTTTTAAGTCGGGGGTGAAAGCCTGTGGCTCAACCACAGAATGGCCTTCGAT  
ACTGGGACGCTTGAGTATGGTAGAGGTTGGTGGAACTGCGAGTGTAGAGGTGAAATTCGTA  
GATATTCGCAAGAACACCGGTGGCGAAGGCGGCCAACTGGACCATTACTGACGCTGAGGCG  
CGAAAGCGTGGGGAGCAAACAGGATTAGATACCCTGGTAGTCCACGCCGTAAACGATGAAT  
GCCAGCTGTTGGGGTGCTTGACCCGCAGTAGCGCAGCTAACGCTTTGAGCATCCGCC

>BSNB\_1141\_ *Methylobacterium\_mesophilicum*

CCGGATACGCCCTTTTGGGGAAAGGTTTACTGCCGGAAGATCGGCCCCGCGTCTGATTAGCTA  
GTTGGTGGGGTAACGGCCTACCAAGGCGACGATCAGTAGCTGGTCTGAGAGGATGATCAGC  
CACACTGGGACTGAGACACGGCCCAGACTCCTACGGGAGGCAGCAGTGGGGAATATTGGA  
CAATGGGCGCAAGCCTGATCCAGCCATGCCGCGTGAGTGATGAAGGCCTTAGGGTTGTAAA  
GCTCTTTTATCCGGGACGATAATGACGGTACCGGAGGAATAAGCCCCGGCTAACTTCGTGCC  
AGCAGCCGCGGTAATACGAAGGGGGCTAGCGTTGCTCGGAATCACTGGGCGTAAAGGGGCG  
GTAGGCGGCGTTTTAAGTCGGGGGTGAAAGCCTGTGGCTCAACCACAGAATGGCCTTCGAT  
ACTGGGACGCTTGAGTATGGTAGAGGTTGGTGGAACTGCGAGTGTAGAGGTGAAATTCGTA

GATATTCGCAAGAACACCGGTGGCGAAGGCGGCCAACTGGACCATTACTGACGCTGAGGCG  
CGAAAGCGTGGGGAGCAAACAGGATTAGATACCTGGTAGTCCACGCCGTAAACGATGAAT  
GCCAGCTGTTGGGGTGCTTGACCCGCAGTAGCGCAGCTAACGCTTTGAGCATCCGCC  
>BSNB\_1179\_ *Rhodococcus\_kroppenstedtii*

CCGCTTAATGCGTTAGCTACGGCACGGATCCCGTGGAAGGAAACCCACACCTAGCGCCCAC  
CGTTTACGGCGTGGACTIONACCAGGGTATCTAATCCTGTTCGCTACCCACGCTTTCGCTCCTCAG  
CGTCAGTTATTTCCCAGAGACCCGCCTTCGCCACCGGTGTTCCCTCCTGATATCTGCGCATTTTC  
ACCGCTACACCAGGAATTCCAGTCTCCCCTGAAATACTCAAGTCTGCCCGTATCGCCTGCAA  
GCCAACAGTTGAGCTGCTGGTTTTACAGACGACGCGACAAACCGCCTACGAGCTCTTTACG  
CCCAGTAATTCCGGACAACGCTTGACCCCTACGTATTACCGCGGCTGCTGGCACGTAGTTGG  
CCGGTGCTTCTTCTGCAGGTACCGTCACTCACGCTTCGTCCCTGCTGAAAGAGGTTTACAACC  
CGAAGGCCGTCATCCCTCACGCGGCGTCGCTGCATCAGGCTTGCGCCCATTGTGCAATATTC  
CCCCTGCTGCCTCCCGTAGGAGTCTGGGCCGTGTCTCAGTCCCAGTGTGGCCGGTCGCCCT  
CTCAGGCCGGCTACCCGTCGTCGCCCTTGGTAGGCCATTACCCACCAACAAGCTGATAGGCC  
GCGGGCCCATCCTGCACCGATAAATCTTTCCACCACACGGCATGCACCGCGCAGTCCTATCC  
GGTATTAGACCCAGTTTCCCGGGCTTATCCCGAAGTGCAGGGCAGATCACCCACGTGTTACT  
CACCCGTTCCGCACTCGTGTACCCCGAAGGGCCTTACCGTTCGACTTGCATGTGTTAAAGCA  
CGCCGCCAGCGTTCGTCCTGA  
>BSNB\_1190\_ *Rhodococcus\_kroppenstedtii*

CCGCTTAATGCGTTAGCTACGGCACGGATCCCGTGGAAGGAAACCCACACCTAGCGCCCAC  
CGTTTACGGCGTGGACTIONACCAGGGTATCTAATCCTGTTCGCTACCCACGCTTTCGCTCCTCAG  
CGTCAGTTATTTCCCAGAGACCCGCCTTCGCCACCGGTGTTCCCTCCTGATATCTGCGCATTTTC  
ACCGCTACACCAGGAATTCCAGTCTCCCCTGAAATACTCAAGTCTGCCCGTATCGCCTGCAA  
GCCAACAGTTGAGCTGCTGGTTTTACAGACGACGCGACAAACCGCCTACGAGCTCTTTACG  
CCCAGTAATTCCGGACAACGCTTGACCCCTACGTATTACCGCGGCTGCTGGCACGTAGTTGG  
CCGGTGCTTCTTCTGCAGGTACCGTCACTCACGCTTCGTCCCTGCTGAAAGAGGTTTACAACC  
CGAAGGCCGTCATCCCTCACGCGGCGTCGCTGCATCAGGCTTGCGCCCATTGTGCAATATTC  
CCCCTGCTGCCTCCCGTAGGAGTCTGGGCCGTGTCTCAGTCCCAGTGTGGCCGGTCGCCCT  
CTCAGGCCGGCTACCCGTCGTCGCCCTTGGTAGGCCATTACCCACCAACAAGCTGATAGGCC  
GCGGGCCCATCCTGCACCGATAAATCTTTCCACCACACGGCATGCACCGCGCAGTCCTATCC  
GGTATTAGACCCAGTTTCCCGGGCTTATCCCGAAGTGCAGGGCAGATCACCCACGTGTTACT  
CACCCGTTCCGCACTCGTGTACCCCGAAGGGCCTTACCGTTCGACTTGCATGTGTTAAAGCA  
CGCCGCCAGCGTTCGTCCTGA  
>BSNB\_1191\_ *Microbacterium\_testaceum*

GGGATAAGCGCTGGAACCGGTGTCTAATACTGGATATGAGCCTCTTCCGCATGGTGGGGGT  
GGAAAGATTTTTTCGGTCTGGGATGGGCTCGCGGCCATCAGCTTGTTGGTGAGGTAATGGCT  
CACCAAGGCGTCGACGGGTAGCCGGCCTGAGAGGGTGACCGGCCACACTGGGACTGAGAC  
ACGGCCCAGACTCCTACGGGAGGCAGCAGTGGGGAATATTGCACAATGGGCGGAAGCCTG  
ATGCAGCAACGCCGCGTGAGGGATGACGGCCTTCGGGTTGTAAACCTCTTTTAGCAGGGAA  
GAAGCGGAAGTGACGGTACCTGCAGAAAAAGCGCCGGCTAACTACGTGCCAGCAGCCGCG  
GTAATACGTAGGGCGCAAGCGTTATCCGGAATTATTGGGCGTAAAGAGCTCGTAGGCGGTTT  
GTCGCGTCTGCTGTGAAATCCCGAGGCTCAACCTCGGGCCTGCAGTGGGTACGGGCAGACT  
AGAGTGCGGTAGGGGAGATTGGAATTCCTGGTGTAGCGGTGGAATGCGCAGATATCAGGAG  
GAACACCGATGGCGAAGGCAGATCTCTGGGCCGTAACCTGACGCTGAGGAGCGAAAGGGTG  
GGGAGCAAACAGGCTTAGATACCTGGTAGTCCACCCCGTAAACGTTGGGAAGTAGTTGTG  
GGGACCATTCCACGGTTTCCGTGACGCAGCTAACGCATTAAGT  
>BSNB\_1192\_ *Microbacterium\_testaceum*

AGATTTTTCGGTCTGGGATGGGCTCGCGGCCTATCAGCTTGTTGGTGAGGTAATGGCTCACC  
AAGGCGTCGACGGGTAGCCGGCCTGAGAGGGTGACCGGCCACACTGGGACTGAGACACGG  
CCCAGACTCCTACGGGAGGCAGCAGTGGGGAATATTGCACAATGGGCGGAAGCCTGATGCA  
GCAACGCCGCGTGAGGGATGACGGCCTTCGGGTTGTAAACCTCTTTTAGCAGGGAAGAAGC  
GAAAGTGACGGTACCTGCAGAAAAAGCGCCGGCTAACTACGTGCCAGCAGCCGCGGTAAT  
ACGTAGGGCGCAAGCGTTATCCGGAATTATTGGGCGTAAAGAGCTCGTAGGCGGTTTGTTCG  
GTCTGCTGTGAAATCCCGAGGCTCAACCTCGGGCCTGCAGTGGGTACGGGCAGACTAGAGT  
GCGGTAGGGGAGATTGGAATTCCTGGTGTAGCGGTGGAATGCGCAGATATCAGGAGGAACA  
CCGATGGCGAAGGCAGATCTCTGGGCCGTAACCTGACGCTGAGGAGCGAAAGGGTGGGGAG  
CAAACAGGCTTAGATACCCTGGTAGTCCACCCCGTAAACGTTGGGAACTAGTTGTGGGGAC  
C

>BSNB\_1207\_ *Bacillus\_subtilis*

GGCTCAGGACGAACGCTGGCGGCGTGCCTAATACATGCAAGTCGAGCGGACAGATGGGAG  
CTTGCTCCCTGATGTTAGCGGCGGACGGGTGAGTAACACGTGGGTAACCTGCCTGTAAGACT  
GGGATAACTCCGGGAAACCGGGGCTAATACCGGATGGTTGTTTGAACCGCATGGTTCAAAC  
ATAAAAGGTGGCTTCGGCTACCACTTACAGATGGACCCGCGGCGCATTAGCTAGTTGGTGA  
GGTAACGGCTCACCAAGGCAACGATGCGTAGCCGACCTGAGAGGGTGATCGGCCACACTGG  
GACTGAGACACGGCCCAGACTCCTACGGGAGGCAGCAGTAGGGAATCTTCCGCAATGGAC  
GAAAGTCTGACGGAGCAACGCCGCGTGAGTGATGAAGGTTTTTCGGATCGTAAAGCTCTGTT  
GTTAGGGAAGAACAAGTACCGTTTCAATAGGGCGGTACCTTGACGGTACCTAACCAGAAAG  
CCACGGCTAACTACGTGCCAGCAGCCGCGGTAATACGTAGGTGGCAAGCGTTGTCCGGAAT  
TATTGGGCGTAAAGGGGCTCGCAGGCGGTTTCTTAAGTCTGATGTGAAAGCCCCCGGCTCAAC  
CGGGGAGGGTCATTGGAAACTGGGGAACCTTGAGTGCAGAAGAGGAGAGTGGAATTCACG  
TGTAAGCGGTGAAATGCGTAGAGATGTGGAGGAACACCAGTGGCGAAGGCGACTCTCTGGTC  
TGTAAGTACGCTGAGGAGCGAAAGCGTGGGGAGCGAACAGGATTAGATACCCTGGTAGTC  
CACGCCGTAAACGATGAGTGCTAAGTGTTAGGGGGTTTTCCGCCCCCTTAGTGCTGCAGCTAAC  
GCATTAAGCACTCCGCC

>BSNB\_1208\_ *Bacillus\_subtilis*

GGCTCAGGACGAACGCTGGCGGCGTGCCTAATACATGCAAGTCGAGCGGACAGATGGGAG  
CTTGCTCCCTGATGTTAGCGGCGGACGGGTGAGTAACACGTGGGTAACCTGCCTGTAAGACT  
GGGATAACTCCGGGAAACCGGGGCTAATACCGGATGGTTGTTTGAACCGCATGGTTCAAAC  
ATAAAAGGTGGCTTCGGCTACCACTTACAGATGGACCCGCGGCGCATTAGCTAGTTGGTGA  
GGTAACGGCTCACCAAGGCAACGATGCGTAGCCGACCTGAGAGGGTGATCGGCCACACTGG  
GACTGAGACACGGCCCAGACTCCTACGGGAGGCAGCAGTAGGGAATCTTCCGCAATGGAC  
GAAAGTCTGACGGAGCAACGCCGCGTGAGTGATGAAGGTTTTTCGGATCGTAAAGCTCTGTT  
GTTAGGGAAGAACAAGTACCGTTTCAATAGGGCGGTACCTTGACGGTACCTAACCAGAAAG  
CCACGGCTAACTACGTGCCAGCAGCCGCGGTAATACGTAGGTGGCAAGCGTTGTCCGGAAT  
TATTGGGCGTAAAGGGGCTCGCAGGCGGTTTCTTAAGTCTGATGTGAAAGCCCCCGGCTCAAC  
CGGGGAGGGTCATTGGAAACTGGGGAACCTTGAGTGCAGAAGAGGAGAGTGGAATTCACG  
TGTAAGCGGTGAAATGCGTAGAGATGTGGAGGAACACCAGTGGCGAAGGCGACTCTCTGGTC  
TGTAAGTACGCTGAGGAGCGAAAGCGTGGGGAGCGAACAGGATTAGATACCCTGGTAGTC  
CACGCCGTAAACGATGAGTGCTAAGTGTTAGGGGGTTTTCCGCCCCCTTAGTGCTGCAGCTAAC  
GCATTAAGCACTCCGCC

>BSNB\_1209\_ *Bacillus\_subtilis*

GGCTCAGGACGAACGCTGGCGGCGTGCCTAATACATGCAAGTCGAGCGGACAGATGGGAG  
CTTGCTCCCTGATGTTAGCGGCGGACGGGTGAGTAACACGTGGGTAACCTGCCTGTAAGACT  
GGGATAACTCCGGGAAACCGGGGCTAATACCGGATGGTTGTTTGAACCGCATGGTTCAAAC  
ATAAAAGGTGGCTTCGGCTACCACTTACAGATGGACCCGCGGCGCATTAGCTAGTTGGTGA

GGTAACGGCTCACCAAGGCAACGATGCGTAGCCGACCTGAGAGGGTGATCGGCCACACTGG  
GACTGAGACACGGCCCAGACTCCTACGGGAGGCAGCAGTAGGGAATCTTCCGCAATGGAC  
GAAAGTCTGACGGAGCAACGCCGCGTGAGTGATGAAGGTTTTCGGATCGTAAAGCTCTGTT  
GTTAGGGAAGAACAAGTACCGTTTCAATAGGGCGGTACCTTGACGGTACCTAACCAGAAAG  
CCACGGCTAACTACGTGCCAGCAGCCGCGGTAATACGTAGGTGGCAAGCGTTGTCCGGAAT  
TATTGGGCGTAAAGGGCTCGCAGGCGGTTTCTTAAGTCTGATGTGAAAGCCCCCGGCTCAAC  
CGGGGAGGGTCATTGGAAACTGGGGAACCTTGAGTGCAGAAGAGGAGAGTGGAATTCCACG  
TGTAAGCGGTGAAATGCGTAGAGATGTGGAGGAACACCAGTGGCGAAGGCGACTCTCTGGTC  
TGTAAGTACGCTGAGGAGCGAAAGCGTGGGGAGCGAACAGGATTAGATACCCTGGTAGTC  
CACGCCGTAAACGATGAGTGCTAAGTGTTAGGGGGTTTTCCGCCCTTAGTGCTGCAGCTAAC  
GCATTAAGCACTCCGCC

>BSNB\_1210\_ *Bacillus\_subtilis*

GGCTCAGGACGAACGCTGGCGGCGTGCCTAATACATGCAAGTCGAGCGGACAGATGGGAG  
CTTGCTCCCTGATGTTAGCGGCGGACGGGTGAGTAACACGTGGGTAACCTGCCTGTAAGACT  
GGGATAACTCCGGGAAACCGGGGCTAATACCGGATGGTTGTTTGAACCGCATGGTTCAAAC  
ATAAAAGGTGGCTTCGGCTACCACTTACAGATGGACCCGCGGCGCATTAGCTAGTTGGTGA  
GGTAACGGCTCACCAAGGCAACGATGCGTAGCCGACCTGAGAGGGTGATCGGCCACACTGG  
GACTGAGACACGGCCCAGACTCCTACGGGAGGCAGCAGTAGGGAATCTTCCGCAATGGAC  
GAAAGTCTGACGGAGCAACGCCGCGTGAGTGATGAAGGTTTTCGGATCGTAAAGCTCTGTT  
GTTAGGGAAGAACAAGTACCGTTTCAATAGGGCGGTACCTTGACGGTACCTAACCAGAAAG  
CCACGGCTAACTACGTGCCAGCAGCCGCGGTAATACGTAGGTGGCAAGCGTTGTCCGGAAT  
TATTGGGCGTAAAGGGCTCGCAGGCGGTTTCTTAAGTCTGATGTGAAAGCCCCCGGCTCAAC  
CGGGGAGGGTCATTGGAAACTGGGGAACCTTGAGTGCAGAAGAGGAGAGTGGAATTCCACG  
TGTAAGCGGTGAAATGCGTAGAGATGTGGAGGAACACCAGTGGCGAAGGCGACTCTCTGGTC  
TGTAAGTACGCTGAGGAGCGAAAGCGTGGGGAGCGAACAGGATTAGATACCCTGGTAGTC  
CACGCCGTAAACGATGAGTGCTAAGTGTTAGGGGGTTTTCCGCCCTTAGTGCTGCAGCTAAC  
GCATTAAGCACTCCGCC

>BSNB\_1220\_ *Rhodococcus\_cerastii*

GGGGTACACGAGCGGCGAACCAGGGGTGAGTAACACGTGGGTGGATCTCCCCTGCACTCTGG  
GATAAGCTTGGGAAACTGGGTCTAATACCGGATATGACCACATCCCGCATGGTGTGTGGTGG  
AAAGATTTATCGGTGCAGGATGGGCCCGCGGCCTATCAGCTTGTGGTGGGGTAATGGCCTA  
CCAAGGCGACGACGGGTAGCCGACCTGAGAGGGTGACCGGCCACACTGGGACTGAGACAC  
GGCCCAGACTCCTACGGGAGGCAGCAGTGGGGAATATTGCACAATGGGCGGAAGCCTGAT  
GCAGCGACGCCGCGTGAGGGATGAAGGCCCTTCGGGTTGTAAACCTCTTTCAGCAGGGACGA  
AGCGTGAGTGACGGTACCTGCAGAAGAAGCACCGGCTAACTACGTGCCAGCAGCCGCGGT  
AATACGTAGGGTGCGAGCGTTGTCCGGAATTACTGGGCGTAAAGAGTTTCGTAGGCGGTTTGT  
CGCGTCGTTTGTGAAAACCCGGGGCTCAACTTCGGGCTTGCAAGGCGATACGGGCAGACTTG  
AGTGTTTCAGGGGAGACTGGAATTCCTGGTGTAGCGGTGAAATGCGCAGATATCAGGAGGA  
ACACCGGTGGCGAAGGCGGGTCTCTGGGAAACAACCTGACGCTGAGGAACGAAAGCGTGGG  
TAGCAAACAGGATTAGATACCCTGGTAGTCCACGCCGTAAACGGTGGGCGCTAGGTGTGGG  
TTCCTTCCACGGGATCTGTGCCGTAGCCTAACGCATTAAGCGCCC

>BSNB\_1238\_ *Bacillus\_subtilis*

GGCTCAGGACGAACGCTGGCGGCGTGCCTAATACATGCAAGTCGAGCGGACAGATGGGAG  
CTTGCTCCCTGATGTTAGCGGCGGACGGGTGAGTAACACGTGGGTAACCTGCCTGTAAGACT  
GGGATAACTCCGGGAAACCGGGGCTAATACCGGATGGTTGTTTGAACCGCATGGTTCAAAC  
ATAAAAGGTGGCTTCGGCTACCACTTACAGATGGACCCGCGGCGCATTAGCTAGTTGGTGA  
GGTAACGGCTCACCAAGGCAACGATGCGTAGCCGACCTGAGAGGGTGATCGGCCACACTGG  
GACTGAGACACGGCCCAGACTCCTACGGGAGGCAGCAGTAGGGAATCTTCCGCAATGGAC



GAAAGTCTGACGGAGCAACGCCGCGTGAGTGATGAAGGTTTTTCGGATCGTAAAGCTCTGTT  
GTTAGGGAAGAACAAGTACCGTTTCAATAGGGCGGTACCTTGACGGTACCTAACCAGAAAG  
CCACGGCTAACTACGTGCCAGCAGCCGCGTAATACGTAGGTGGCAAGCGTTGTCCGGAAT  
TATTGGGCGTAAAGGGCTCGCAGGCGGTTTCTTAAGTCTGATGTGAAAGCCCCGGCTCAAC  
CGGGGAGGGTCATTGGAACTGGGGAACCTTGAGTGCAGAAGAGGAGAGTGGAATTCACG  
TGTAAGCGGTGAAATGCGTAGAGATGTGGAGGAACACCAGTGGCGAAGGCGACTCTCTGGTC  
TGTAAGTACGCTGAGGAGCGAAAGCGTGGGGAGCGAACAGGATTAGATACCCTGGTAGTC  
CACGCCGTAAACGATGAGTGCTAAGTGTTAGGGGGTTTCCGCCCCCTTAGTGCTGCAGCTAAC  
GCATTAAGCACTCCGCC

>BSNB\_1246\_ *Rhodococcus\_cerastii*

GGGGTACACGAGCGGCGAACCGGGGTGAGTAACACGTGGGTGGATCTCCCCTGCACTCTGG  
GATAAGCTTGGGAACTGGGTCTAATACCGGATATGACCACATCCCGCATGGTGTGTGGTGG  
AAAGATTTATCGGTGCAGGATGGGCCCCGCGGCTATCAGCTTGTGGTGGGGTAATGGCCTA  
CCAAGGCGACGACGGGTAGCCGACCTGAGAGGGTGACCGGCCACACTGGGACTGAGACAC  
GGCCCAGACTCCTACGGGAGGCAGCAGTGGGGAATATTGCACAATGGGCGGAAGCCTGAT  
GCAGCGACGCCGCGTGAGGGATGAAGGCCCTTCGGGTGTAAACCTCTTTCAGCAGGGACGA  
AGCGTGAGTGACGGTACCTGCAGAAGAAGCACCGGCTAACTACGTGCCAGCAGCCGCGGT  
AATACGTAGGGTGCGAGCGTTGTCCGGAATTACTGGGCGTAAAGAGTTCGTAGGCGGTTTGT  
CGCGTCGTTTGTGAAAACCCGGGGCTCAACTTCGGGCTTGACGGCGATACGGGCAGACTTG  
AGTGTTTCAGGGGAGACTGGAATTCCTGGTGTAGCGGTGAAATGCGCAGATATCAGGAGGA  
ACACCGGTGGCGAAGGCGGGTCTCTGGGAAACAACCTGACGCTGAGGAACGAAAGCGTGGG  
TAGCAAACAGGATTAGATACCCTGGTAGTCCACGCCGTAAACGGTGGGCGCTAGGTGTGGG  
TTCCTTCCACGGGATCTGTGCCGTAGCCTAACGCATTAAGCGCCC

>BSNB\_A1F2A1\_ *Klebsiella\_michiganensis*

TTCATGGCTCAGATTGAACGCTGGCGGCAGGCCTAACACATGCAAGTCGAGCGGTAGCACG  
GGGAGCTTGCTCCTGGGTGACGAGCGGCGGACGGGTGAGTAATGTCTGGGGATCTGCCTGA  
TGGAGGGGGATAACTACTGGAAACGGTAGCTAATACCGCATAACGTTCGCAAGACCAAAGA  
GGGGGACCTTCGGGCCTCTTGCCATCAGATGAACCCAGATGGGATTAGCTAGTAGGTGGGG  
TAATGGCTCACCTAGGCGACGATCCCTAGCTGGTCTGAGAGGATGACCAGCCACACTGGAA  
CTGAGACACGGTCCAGACTCCTACGGGAGGCAGCAGTGGGGAATATTGCACAATGGGCGCA  
AGCCTGATGCAGCCATGCCGCGTGTATGAAGAAGGCCTTCGGGTTGTAAAGTACTTTCAGCG  
AGGAGGAAGGCGTTAAGGTTAATAACCTTGGCGATTGACGTTACTCGCAGAAGAAGCACCG  
GCTAACTCCGTGCCAGCAGCCGCGGTAATACGGAGGGTGCAAGCGTTAATCGGAATTACTG  
GGCGTAAAGCGCACGCAGGCGGTTTGTAAAGTCGGATGTGAAATCCCCGGGCTCAACCTGG  
GAACTGCATTGCAAACTGGCAAGCTTGAGTCTTGTAGAGGGGGGTAGAATTCCAGGTGTAG  
CGGTGAAATGCGTAGAGATCTGGAGGAATACCGGTGGCGAAGGCGGCCCCCTGGACAAAG  
ACTGACGCTCAGGTGCGAAAGCGTGGGGAGCAAACAGGATTAGATACCCTGGTAGTCCACG  
CCGTAAACGATGTGCACTTGAGGTTGTGCCCTTGAGGCGTGGCTTCGGGAGCTAACGCGTT  
AAGTCGACCGCCTG

>BSNB\_A4F1\_12\_ *Klebsiella\_michiganensis*

TTCATGGCTCAGATTGAACGCTGGCGGCAGGCCTAACACATGCAAGTCGAGCGGTAGCACG  
GGGAGCTTGCTCCTGGGTGACGAGCGGCGGACGGGTGAGTAATGTCTGGGGATCTGCCTGA  
TGGAGGGGGATAACTACTGGAAACGGTAGCTAATACCGCATAACGTTCGCAAGACCAAAGA  
GGGGGACCTTCGGGCCTCTTGCCATCAGATGAACCCAGATGGGATTAGCTAGTAGGTGGGG  
TAATGGCTCACCTAGGCGACGATCCCTAGCTGGTCTGAGAGGATGACCAGCCACACTGGAA  
CTGAGACACGGTCCAGACTCCTACGGGAGGCAGCAGTGGGGAATATTGCACAATGGGCGCA  
AGCCTGATGCAGCCATGCCGCGTGTATGAAGAAGGCCTTCGGGTTGTAAAGTACTTTCAGCG  
AGGAGGAAGGCGTTAAGGTTAATAACCTTGGCGATTGACGTTACTCGCAGAAGAAGCACCG  
GCTAACTCCGTGCCAGCAGCCGCGGTAATACGGAGGGTGCAAGCGTTAATCGGAATTACTG

GGCGTAAAGCGCACGCAGGCGGTTTGTAAAGTCGGATGTGAAATCCCCGGGCTCAACCTGG  
GAACTGCATTCGAAACTGGCAAGCTTGAGTCTTGTAGAGGGGGGTAGAATTCCAGGTGTAG  
CGGTGAAATGCGTAGAGATCTGGAGGAATACCGGTGGCGAAGGCGGCCCCCTGGACAAAG  
ACTGACGCTCAGGTGCGAAAGCGTGGGGAGCAAACAGGATTAGATACCCTGGTAGTCCACG  
CCGTAAACGATGTCGACTTGGAGGTTGTGCCCTTGAGGCGTGGCTTCCGGAGCTAACGCGTT  
AAGTCGACCGCCTG

>BSNB\_LRFP\_069\_ *Methylobacterium\_mesophilicum*

CCGGATACGCCCTTTTGGGGAAAGGTTTACTGCCGGAAGATCGGCCCCGCGTCTGATTAGCTA  
GTTGGTGGGGTAACGGCCTACCAAGGCGACGATCAGTAGCTGGTCTGAGAGGATGATCAGC  
CACTGGGACTGAGACACGGCCCAGACTCCTACGGGAGGCAGCAGTGGGGAATATTGGA  
CAATGGGCGCAAGCCTGATCCAGCCATGCCGCGTGAGTGATGAAGGCCTTAGGGTTGTAAA  
GCTCTTTTATCCGGGACGATAATGACGGTACCGGAGGAATAAGCCCCGGCTAACTTCGTGCC  
AGCAGCCGCGGTAATACGAAGGGGGCTAGCGTTGCTCGGAATCACTGGGCGTAAAGGGCGC  
GTAGGCGGCGTTTTAAGTCGGGGGTGAAAGCCTGTGGCTCAACCACAGAATGGCCTTCGAT  
ACTGGGACGCTTGAGTATGGTAGAGGTTGGTGGAACTGCGAGTGTAGAGGTGAAATTCGTA  
GATATTCGCAAGAACACCGGTGGCGAAGGCGGCCAACTGGACCATTACTGACGCTGAGGCG  
CGAAAGCGTGGGGAGCAAACAGGATTAGATACCCTGGTAGTCCACGCCGTAAACGATGAAT  
GCCAGCTGTTGGGGTGCTTGCACCGCAGTAGCGCAGCTAACGCTTTGAGCATCCGCC

TABLE S5. ITS OF STUDIED FUNGAL STRAINS (BSNB)

>BSNB\_0001\_ *Epicoccum\_nigrum*

TGGGTATCCTACATGATCCGAGGTCAAGAGTGTA AAAATGTACTTTTGGACGTCGTCGTTAT  
GAGTGCAAAGCGCGAGATGTACTGCGCTCCGAAATCAATACGCCGGCTGCCAATTGTTTTAA  
GGCGAGTCTGCGCGCGGAGGCGAGACAAAACACCAACACCAAGCAGAGCTTGAAGGTAC  
AAATGACGCTCGAACAGGCATGCCCCATGGAATACCAAGGGGCGCAATGTGCGTTCAAAG  
ATTCGATGATTCACTGAATTCTGCAATTCACACTACTTATCGCATTTTCGCTGCGTTCTTCATCG  
ATGCCAGAACCAAGAGATCCGTTGTTGAAAGTTGTA ACTATTAAGTTTTTTCAGACGCTGATT  
GCAACTGCAAAGGGTTTGAATGTTGTCCAACCGGCGGGCGGACCCGCCGAGGAAACGAAG  
GTACTCAAAGACATGGGTAAGAGGTAGCAGACCGAAGTCTGCAA ACTCTAGGTAATGATC  
CTCCGCAGGTTACCCCTACGGAAGGA

>BSNB\_0002\_ *Colletotrichum\_gloeosporioides*

TGGGTCTCCTACCTGATCCGAGGTCAACCTTTGGAAAATTGGGGGGTTTTACGGCAAGAGTC  
CCTCCGGATCCCAGTGCGAGACGTAAAGTTACTACGCAAAGGAGGCTCCGGGAGGGTCCGC  
CACTACCTTTGAGGGCCTACATCAGCTGTAGGGCCCCAACACCAAGCAGAGCTTGAGGGTT  
GAAATGACGCTCGAACAGGCATGCCCCGCCAGAATGCTGGCGGGCGCAATGTGCGTTCAAAG  
ATTCGATGATTCACTGAATTCTGCAATTCACATTACTTATCGCATTTTCGCTGCGTTCTTCATCG  
ATGCCAGAACCAAGAGATCCGTTGTTAAAAGTTTTGATTATTTGCTTGTACCACTCAGAAGA  
AACGTCGTTAAATCAGAGTTTGGTTATCCTCCGGCGGGCGCCGACCCGCCCGGGGGCGGGA  
GGCCGGGAGGGTCACGGAGACCCTACCCGCCGAAGCAACAGTTATAGGTATGTTACAAAAG  
GGTTATAGAGCGTAAACTCAGTAATGATCCCTCCGAAGGTTACCCCTACGGAA

>BSNB\_0006\_ *Pestalotiopsis\_sp*

GTCGGGGATACTACCTGATCCGAGGTCAACCCAGTAAAAAAGTTGGGGGTTTAGCGGCGAG  
GGCCACGGCACCTACAGAAGCGAGAGGTATATTACTGCGCTCAGAGGTAGAACCGTCACTC  
CGCCGGTGAATTTGAGGAGCTACAGGGTAACAGCTACAGGGTAGCTCCCGGGTAGTCTCCC  
AACGCCAAGACTAGGTCTTGAGTGGTACTAATGACGCTCGAACAGGCATGCCCTCCAGAAT  
GCTGGGGGGCGCAATGTGCGTTCAAAGATTTCGATGATTCACTGAATTCTGCAATTCACATTA  
CTTATCGCATTTTCGCTGCGTTCTTCATCGATGCCAGAACCAAGAGATCCGTTGTTAAAGGTTT  
TGACTTATTTTCATAAGACTCTCAGATGATAATAACAAATAGTTTGGTTTTCCACCGGCGG  
TCCGCCCCGCTACAGGGTAAGCTGCAGGGTAAGACCGCCGAGGCAACGTAAGGTATAGGTTT  
ACAAATGGTTTATACAGGAGTGTTTTAATACTCTGTAATGATCCCTCCGCAGGTTACCCCTAC  
AGAA

>BSNB\_0008\_ *Pestalotiopsis\_sp*

TGGGGTATCTACCTGATCCGAGGTCAACCCAGTAAAAAAGTTGGGGGTTTAGCGGCGAGGG  
CCACGGCACCTACAGAAGCGAGAGGTATATTACTGCGCTCAGAGGTAGAACCGTCACTCCG  
CCGGTGAATTTGAGGAGCTACAGGGTAACAGCTACAGGGTAGCTCCCGGGTAGTCTCCCAA  
CGCCAAGACTAGGTCTTGAGTGGTACTAATGACGCTCGAACAGGCATGCCCTCCAGAATGC  
TGGGGGGCGCAATGTGCGTTCAAAGATTTCGATGATTCACTGAATTCTGCAATTCACATTACTT  
ATCGCATTTTCGCTGCGTTCTTCATCGATGCCAGAACCAAGAGATCCGTTGTTAAAGGTTTTGA  
CTTATTTTCATAAGACTCTCAGATGATAATAACAAATAGTTTGGTTTTCCACCGGCGGTCC  
GCCCCGCTACAGGGTAAGCTGCAGGGTAAGACCGCCGAGGCAACGTAAGGTATAGGTTTACA  
AATGGTTTATACAGGAGTGTTTTAATACTCTGTAATGATCCCTCCGCAGGTTACCCCTACGGA  
A

>BSNB\_0018\_ *Chaetomium\_globosum*

CTACCTGATCCGAGGTCAACCTTGGGTAAAAAGGTGGTTTAACGGCCGGAACCCGCAGCAC  
GCCCAGAGCGAGATGTATGCTACTACGCTCGGTGTGACAGCGAGCCCGCCACTGCTTTTCAG  
GGCCTGCGGCAGCCGAGGTCCCCAACACAAGCCCGGGGGCTTGATGGTTGAAATGACGCT  
CGAACAGGCATGCCCCGCCAGAATACTGGCGGGCGCAATGTGCGTTCAAAGATTCGATGATT  
CACTGAATTCTGCAATTCACATTACTTATCGCATTTTCGCTGCGTTCTTCATCGATGCCAGAAC  
CAAGAGATCCGTTGTTGAAAGTTTTGACTTATTCAGTACAGAAGACTCAGAGAGGCCATAA  
ATTATCAAGAGTTTGGTGACCTCCGGCGGGCGCCCGCGGTGGGGGCCAGGGGCGCCCGGGG  
GGTAAACCCCGGGGCGCCCGCCGAAGCAACGGTTTAGGTAACGTTCACAATGGTTTAGGG  
AGTTTTGCAACTCTGTAATGATCCCTCCGCAGGTTACCTACGGAA  
>BSNB\_0020\_Diaporthe\_phaseolorum

CGACTAGCTGCATGATCCGAGGTCAAATTTTACAGAAGTTGGGGGTTTAACGGCAGGGCAC  
CGCCAGGGCCTTCCAGAACGAGATATACTACTACGCTCGGGGTCTAGCGAGCTCGCCAC  
TAGATTTACAGGGCCTGCCCTCGTTAGAAGGCAGTGCCCCATCACCAAGCCAGGCTTGAGGGT  
TGAAATGACGCTCGAACAGGCATGCCCTCCGGAATACCAGAGGGCGCAATGTGCGTTCAA  
GATTCGATGATTCACTGAATTCTGCAATTCACATTACTTATCGCATTTTCGCTGCGTTCTTCATC  
GATGCCAGAACCAAGAGATCCGTTGTTGAAAGTTTTGATTCATTTATGTTTTTACTCAGAGA  
TTCACTAAAGAAACAAGAGTTTAGTTGGCCGCCGGCGGGCTGCTCCCTGTTTCCAGGGGGCC  
TCAGTGAAGAGGCCGGCCTGCGCCGAGGCAACAAATAGGTATAAGTTCACAAAGGGTTTCT  
GGGTGCGCCGAAGCGCGTTCCAGCAATGATCCCTCCGCAGGTTCCCCCTACGGAAG  
>BSNB\_0022\_Xylaria\_cubensis

NNNNNNNNNGGCAGAACCGATTMTGAGGTATGCCTTGCAAGAAKTTGGGGTTTTACGGCAG  
GGGTATCAGTCCAATAATAGGCGAGATAAAAAATTACTACGTCTAGAGTGTGAACCAACT  
CCGCCACTAACTTTGAGGAGCTACGTTACCGTAGGCTCCCAACACTAAGCAACTAAGGCTTA  
AGGGTTGAAATGACGCTCGAACGGTCTGCCACTAGAATACTAATGGGCGCAATATGCGT  
TCAAAGATTCGATGATTCACTGAATTCTGCAATTCACATTACTTATCGCATTTTCGCTGCGTTCT  
TCATCGATGCCAGAACCAAGAGATCCGTTGTTGAAAGTTTTAACTTATTTAGTTATAGGTTCA  
GAATTCAATATCAAACAGAGTTTGGTGGGCCGCCGCGCAGGCTTACCCGCACCTCCCGGGTA  
AGTCTTACAGGGTAAGTCTACGAGGTAGGCGCGACCTGCCGAGGCAACGTTAGGTATGTTT  
ACATGGGTTTGGGAGTTATAGAACTCTTTAATGATCCCTCCGCAGGTTACCTACGGAGGGA  
>BSNB\_0024\_Mycoleptodiscus\_sp

TAATCAAACCTGCATAATTCGAGGTCGACGTGAGAAAAAATGAAGTTTCGTTTGTCCGGCTGG  
CTTCGGGCTGCTCAAAGCTGCATTGCTGCTGCGCTCCAGGCTGCACCGGCACCGCCGATGGA  
TTCAAGGGCCGCTCCGTATTTACAGGGGCGGTCCCCAACACTAAGCTTGCGTTAAGGGTCG  
AAACGACGCTCGAATAGGCATGCCTCGAGGAATACCAAGAGGCGCAATGTGCGTTCAAAG  
ACTCGATGATTCACTGAAATCTGCAATTCACACTAGTTATCGCATTTTCGCTGCGTTCTTCATC  
GATGCTGGAGCCAAGAGATCCATTGTTGAAAGTTGTATTTATCGCATTCGCGAAGGTAAAAT  
CAGACGTTCTTCGAACAGAATGGTTTTGTAGCGTCTGCGCGGGCTGCTCCTCCCGAGGGA  
GGGGCGCCAGTCGAGCCAGTGCCGGCCCCGCCGAGGCAACGAAACGTTTGGCAAACAGTGG  
TTTGAGAATCGGGGCCACGAGGGCACCTTTTCTGTTAATGATCCTCCGCAGGTTACCTA  
CGGAAG  
>BSNB\_0025\_Colletotrichum\_siamense

GGTGTATGCTACCTGATCCGAGGTCAACCTTTGGAAAATTGGGGGGTTTTACGGCAAGAGTC  
CCTCCGGATCCCAGTGCGAGACGTAAAGTTACTACGCAAAGGAGGCTCCGGGAGGGTCCGC  
CACTACCTTTGAGGGCCTACATCAGCTGTAGGGCCCCAACCAAGCAGAGCTTGAGGGTT  
GAAATGACGCTCGAACAGGCATGCCCCGCCAGAATGCTGGCGGGCGCAATGTGCGTTCAAAG  
ATTCGATGATTCACTGAATTCTGCAATTCACATTACTTATCGCATTTTCGCTGCGTTCTTCATCG  
ATGCCAGAACCAAGAGATCCGTTGTTAAAAGTTTTGATTATTTGCTTGTACCACTCAGAAGA

AACGTCGTTAAATCAGAGTTTGGTTATCCTCCGGCGGGCGCCGACCCGCCCGGGGGCGGGA  
GGCCGGGAGGGTCACGGAGACCCTACCCGCCGAAGCAACAGTTATAGGTATGTTACAAAG  
GTTATAGAGCGTAAACTCAGTAGTGATCCCTCCAAAGGTTACCTACGGAA  
>BSNB\_0026\_Mycoleptodiscus\_sp

TTAATAACGGATACTGCATAATTCGAGGTCGACGTGAGAAAAATGAAGTTTCGTTTGTCCG  
GCTGGCTTCGGGCTGCTCAAAGCTGCATTGCTGCTGCGCTCCAGGCTGCACCGGCACCGCCG  
ATGGATTCAAGGGCCGCTCCGTATTTACGGGGCGGTCCCCAACACTAAGCTTTCGCTTAAG  
GGTCGAAACGACGCTCGAATAGGCATGCCTCGAGGAATACCAAGAGGCGCAATGTGCGTTC  
AAAGACTCGATGATTCACTGAAATCTGCAATTCACACTAGTTATCGCATTTTCGCTGCGTTCCT  
CATCGATGCTGGAGCCAAGAGATCCATTGTTGAAAGTTGTATTTATCGCATTCGCGAAGGTA  
AAATCAGACGTTCTTCGAACAGAATGGTTTTGTAGCGTCTGCGGCGGGCTGCTCCTCCCGA  
GGGAGGGGCGCCAGTCGAGCCAGTGCCGGCCCGCCGAGGCAACGAAACGTTTGGTAAACA  
GTGGTTTGAGAATCGGGGCCACGAGGGCACCCTTTTCTGTTAATGATCCTTCCGCAGGTTT  
ACCCTACGGAAG  
>BSNB\_0029\_Colletotrichum\_gloeosporioides

GGGTATCCTACCTGATCCGAGGTCAACCTTTGGAAAATTGGGGGGTTTTACGGCAAGAGTCC  
CTCCGGATCCCAGTGCGAGACGTAAAGTTACTACGCAAAGGAGGCTCCGGGAGGGTCCGCC  
ACTACCTTTGAGGGCCTACATCAGCTGTAGGGCCCCAACACCAAGCAGAGCTTGAGGGTTG  
AAATGACGCTCGAACAGGCATGCCCCCAGAATGCTGGCGGGCGCAATGTGCGTTCAAAGA  
TTCGATGATTCACTGAATTCTGCAATTCACATTACTTATCGCATTTTCGCTGCGTTCCTCATCGA  
TGCCAGAACCAAGAGATCCGTTGTTAAAAGTTTTGATTATTTGCTTGTAACCTCAGAAGAA  
ACGTCGTTAAATCAGAGTTTGGTTATCCTCCGGCGGGCGCCGACCCGCCCGGAGGCGGGAG  
GCCGGGAGGGTCGCGGAGACCCTACCCGCCGAAGCAACAGTTATAGGTATGTTACAAAGG  
GTTATAGAGCGTAAACTCAGTAATGATCCCTCCGCAGGTTCCCCCTACGGAAG  
>BSNB\_0032\_Colletotrichum\_boninense

TGGGTATGCTACCTGATCCGAGGTCAACCTTTGGAAAATTGGGGGGTTTTACGGCAAGAGTC  
CCTCCGGATCCCAGTGCGAGACGAAATGTTACTACGCAAAGGAGGCTCCGGGAGGGTCCGC  
CACTACCTTTGAGGGCCTACGTCGACCGTAGAGCCCCAACACCAAGCAGAGCTTGAGGGTT  
GAAATGACGCTCGAACAGGCATGCCCCCAGAATGCTGGCGGGCGCAATGTGCGTTCAAAG  
ATTCGATGATTCACTGAATTCTGCAATTCACATTACTTATCGCATTTTCGCTGCGTTCCTCATCG  
ATGCCAGAACCAAGAGATCCGTTGTTAAAAGTTTTGATTATTTTGCTTATGCCACTCAGAAG  
AAACGTCGTTACAATAGAGTTTGGTTATCCTCCGGCGGGCGCCGGGTCCGGTCCCGCGGGGG  
GTCCGGTCCGGGCCGGGAGGCGTCTTTTACGGGGACGGCCTACCCGCCGAAGCAACAGTT  
GTAGGTATGTTACAAAGGGTTATAGAGCGGTAACCTCAGTAATGATCCCTCCACAGGTTACC  
CCTACGGAAG  
>BSNB\_0033\_Diaporthes\_phaseolorum

CTACCTGATCCGAGGTCAAATTTTACAGAAGTTGGGGGTTTAAACGGCAGGGCACCGCCAGGG  
CCTTCCAGAACGAGATATACTACTACGCTCGGGGTCTAGCGAGCTCGCCACTAGATTTCA  
GGGCTGCCCTCGTTAGAAGGCAGTGCCCCATCACCAAGCCAGGCTTGAGGGTTGAAATGA  
CGCTCGAACAGGCATGCCCTCCGGAATACCAGAGGGCGCAATGTGCGTTCAAAGATTCGAT  
GATTCACTGAATTCTGCAATTCACATTACTTATCGCATTTTCGCTGCGTTCCTCATCGATGCCA  
GAACCAAGAGATCCGTTGTTGAAAGTTTTGATTCAATTATGTTTTTACTCAGAGATTCATA  
AAGAAACAAGAGTTTAGTTGGCCGCCGGCGGGCTGCTCCCTGTTTCCAGGGGGCCTCAGTG  
AAGAGGCCCGCCTGCGCCGAGGCAACAAATAGGTATAAGTTCACAAAGGGTTTCTGGGTGC  
GCCGAAGCGCGTTCCAGCAATGATCCCTCCGCAGGTTACCCCTACGGAAG  
>BSNB\_0035\_Colletotrichum\_boninense

TTAGCTAGCTTCGNTTATTGGTCTGCTCCTGGAAAATTGGGGGGTTTTACGGCAAGAGTCCCT  
CCGGATCCCAGTGCAGACGAAATGTTACTACGCAAAGGAGGCTCCGGGAGGGTCCGCCAC  
TACCTTTGAGGGCCTACGTCGACCGTAGAGCCCCAACACCAAGCAGAGCTTGAGGGTTGAA  
ATGACGCTCGAACAGGCATGCCCCGCCAGAATGCTGGCGGGCGCAATGTGCGTTCAAAGATT  
CGATGATTCACTGAATTCTGCAATTCACATTACTTATCGCATTTTCGCTGCGTTCTTCATCGATG  
CCAGAACCAAGAGATCCGTTGTTAAAAGTTTTGATTATTTTGCTTATGCCACTCAGAAGAAA  
CGTCGTTACAATAGAGTTTGGTTATCCTCCGGCGGGCGCCGGGTCCGGTCCCGCGGGGGGTC  
CGGTCCGGGCCGGGAGGCGTCCTTTTCAGGGGACGGCCTACCCGCCGCAGCAACAGTTGTA  
GGTATGTTACAAAGGGTTATAGAGCGGTAACCTCAGTAATGATCCCTCCGCAGGTTACACCT  
ACGGA

>BSNB\_0038\_Xylaria\_cubensis

NNNNNNNNNNNGGAACCTTCGATTATTGTCTGCTCCTCCGCGTTGTGGTTTTACCGCCCCGGT  
TATCCGACCCACCCCTAAGCGAGAGATACGTTACTACGYTAGGRCGTGAAACCCCTCCGCC  
ACTAACTTTGAGGAGCTACTTTGGCGTAAGCTCCCGCCACTAGAGGCTAAAGCTTAAGGGG  
ACAAATGACCCTGGATGCGCCCTGCCCACTAAAGTACTAATGGGCGCAATATGCGATCAAA  
GATTTCGAYYATTCTCTGAATTCYGCATTTCTCATTACTTATCGCTTTTCTCTGCGTTCTTCATCG  
ATCCCAGAACCCAGATATCCGTTGTTGAAAGTTTTAACTTATTTTGTTATAGGTTCAAAATTC  
AATATCAAACATARTTTGGTGGGCCCGCCGGCGGCTTACCCGCACCTCCCGGGTAAGTCTTA  
CCGGGTAAGACTACCAGGTAGGCGCGACCTGCCGAGGCAACGTTAGGTATGTTACAGTGGG  
TTTGGGAGTTATAGAACTCTTTAATGATCCCTCCGCAGGTTACCTACGGAAGG

>BSNB\_0039\_Colletotrichum\_gloeosporioides

TCTACCTGATCCGAGGTCAACCTTTGGAAAATTGGGGGGTTTTACGGCAAGAGTCCCTCCGG  
ATCCCAGTGCAGACGAAATGTTACTACGCAAAGGAGGCTCCGGGAGGGTCCGCCACTACC  
TTTGAGGGCCTACGTCGACCGTAGAGCCCCAACACCAAGCAGAGCTTGAGGGTTGAAATGA  
CGCTCGAACAGGCATGCCCCGCCAGAATGCTGGCGGGCGCAATGTGCGTTCAAAGATTTCGAT  
GATTCACTGAATTCTGCAATTCACATTACTTATCGCATTTTCGCTGCGTTCTTCATCGATGCCA  
GAACCAAGAGATCCGTTGTTAAAAGTTTTGATTATTTTGCTTATGCCACTCAGAAGAAACGT  
CGTTACAATAGAGTTTGGTTATCCTCCGGCGGGCGCCGGGTCCGGTCCCGCGGGGGGTCCGG  
TCCGGGCCGGGAGGCGTCCTTTTCAGGGGACGGCCTACCCGCCGAAGCAACAGTTGTAGGT  
ATGTTACAAAGGGTTATAGAGCGGTAACCTCAGTAATGATCCCTCCGCAGGTTACCTACGG  
AA

>BSNB\_0041\_Xylaria\_sp

GGGGTATCCTACCTAATCCGAGGTCAACCACTAGAAAATATAGGGGTTTTAACGGCTAGCA  
GCCAGGGCCACCACACGAGCGAGAGAAATTACTACGCTGAGAGTGTACCCTAACTCCGCAC  
TAACTTTGAGGAACTACGCCGTAGATTCCCAACGCTAAGCAACAGGGGCTTAGGGGTCGAA  
ATGACGCTCGAATAGGCATGCCCACTAGAATACTAGTGGGCGCAATGTGCGTTCAAAGATT  
CGATGATTCACTGAATTCTGCAATTCACATTACTTATCGCATTTTCGCTGCGTTCTTCATCGATG  
CCAGAACCAAGAGATCCGTTGTTGAAAGTTTTAACTTATTTTGTTTTAAAATCAGAGAAACA  
GTGGTAAAAACAAGAGTTTAAACGGTCCTTCGGCGGGCCGAAGCCGACTACAGGGTAGCTCC  
AGGGTAGCTCCAGGGTAGCTATAGGGTAGCTGCAGGGTAAGTGCAGGGTAGCTATAGGGTA  
GCTATAGGGTAACCTTAGGGTAGCTCCAGGGTAGTTACAGGGTAGCCGTAGCTACGCCGA  
GGCAACGATGGTAAGGTTACAAAGGGTTTGGAGTTTTGATAACTCAGTAATGATCCCTCCG  
CAGATTACCCCTTACGGGAA

>BSNB\_0042\_Guignardia\_mangiferae

AAGGCCTGCTACATGATCCGAGGTCAACCTTGGAAAAATAGACCGAAGGTGCGATTGTCCGG  
CGGCCGTGCCCCAGCACTCCAAAGCGAGATATTTTACTACTACGCTCGAGGCTAGGACGCC  
GTCGCCGAGGTCTTCAAGGCACGTCCGGCAGCGGACGTTGCCCAATACCAAGCAGAGCTTG

AGGGTTGAAATGACGCTCGAACAGGCATGCCCTCCGGAATACCAGAGGGCGCAATGTGCGT  
TCAAAGATTTCGATGATTCACTGAATTCTGCAATTCACATTACTTATCGCATTTTCGCTGCGTTCT  
TCATCGATGCCAGAACCAAGAGATCCGTTGTTGAAAGTTTTAATCAATTAATGATATATCA  
GGACTTCACAAAATGAATTCCTTGAGTTTTGTATACTGGCGGGCACTTAGCCGGGCGTCCTGG  
CCAGTTAAGGCTGGGGGCGCCGCGCCTGGGTTCGGAACCAGGTCGACCCGCCAAAGCAA  
CATAGTGAGTACACAAGGGTGAGAAGGTCATTTTCGGCGTTGTAGCGCCTACTCTGGAACCTT  
TCAATAGAAGTTATTACATTTTCAGTAATGATCCTTCCGCAGGTTACCCCTACGGAAGG

>BSNB\_0043\_Pestalotiopsis\_sp

GGGGTATCCTACCTGATCCGAGGTCAACCCAGTAAAAAAGTTGGGGGTTTAGCGGCGAGGG  
CCACGGCACCTACAGAAGCGAGAGGTATATTACTGCGCTCAGAGGTAGAACCGTCACTCCG  
CCGGTGAATTTGAGGAGCTACAGGGTAACAGCTACAGGGTAGCTCCCGGGTAGTCTCCCAA  
CGCCAAGACTAGGTCTTGAGTGGTACTAATGACGCTCGAACAGGCATGCCCTCAGAAATGC  
TGGGGGGCGCAATGTGCGTTCAAAGATTCGATGATTCACTGAATTCGCAATTCACATTACTT  
ATCGCATTTTCGCTGCGTTCTTCATCGATGCCAGAACCAAGAGATCCGTTGTTAAAGGTTTTGA  
CTTATTTTCATAAGACTCTCAGATGATAATAATACAAATAGTTTGGCTTTCCACCGGCGGTCC  
GCCCCTACAGGGTAAGCTGCAGGGTAAGACCGCCGAGGCAACGTAAGGTATAGGTTTACA  
AATGGTTTATACAGGAGTGTTTAATACTCTGTAATGATCCCTCCGCAGGTTCCCCCTACAGA  
A

>BSNB\_0044\_Diaporthe\_sp

GGGTATGCTACATGATCCGAGGTCAAAATTTTCAGAAGTTGGGGGTTTAACGGCAGGGCACC  
GCCAGGGCCTTCCAGAACGAGATATAACTACTACGCTCGGGGTCCTAGCGAGCTCGCCACT  
AGATTTTCAGGGCCTGCTTCTCTCGAAGCAGTGCCCCAACACCAAGCCAGGCTTGAGGGTTGA  
AATGACGCTCGAACAGGCATGCCCTCCGGAATACCAGAGGGCGCAATGTGCGTTCAAAGAT  
TCGATGATTCACTGAATTCGCAATTCACATTACTTATCGCATTTTCGCTGCGTTCTTCATCGAT  
GCCAGAACCAAGAGATCCGTTGTTGAAAGTTTTGATTCAATTTATGTTTTTTACTCAGAGATTC  
ACTAAGAAACAAGAGTTTGGTTGGCCGCCGGCGGGCTGCTCCCCGTCTCCGGGGGGCCTCA  
GAAGAGGCCGGCCTTCGCCGAGGCAACAATAGGTATAAGTTCACAAAGGGTTTCTGGGTGC  
GCCGAGGCGCGTTCCAGCAATGATCCCTCCGCAGGTTCCCCCTACGGAA

>BSNB\_0047\_Diaporthe\_sp

GGGTATGCTACCTGATCCGAGGTCAAAATTTTCAGAAGTTGGGGGTTTAACGGCAGGGCACC  
GCCAGGGCCTTCCAGAACGAGATATAACTACTACGCTCGGGGTCCTAGCGAGCTCGCCACT  
AGATTTTCAGGGCCTGCTTCTCTCGAAGCAGTGCCCCAACACCAAGCCAGGCTTGAGGGTTGA  
AATGACGCTCGAACAGGCATGCCCTCCGGAATACCAGAGGGCGCAATGTGCGTTCAAAGAT  
TCGATGATTCACTGAATTCGCAATTCACATTACTTATCGCATTTTCGCTGCGTTCTTCATCGAT  
GCCAGAACCAAGAGATCCGTTGTTGAAAGTTTTGATTCAATTTATGTTTTTTACTCAGAGATTC  
ACTAAGAAACAAGAGTTTGGTTGGCCGCCGGCGGGCTGCTCCCCGTCTCCGGGGGGCCTCA  
GAAGAGGCCGGCCTTCGCCGAGGCAACAATAGGTATAAGTTCACAAAGGGTTTCTGGGTGC  
GCCGAGGCGCGTTCCAGCAATGATCCCTCCGCAGGTTCCCCCTACGGAA

>BSNB\_0048\_Xylariales\_sp

CGCACTGCTACCTAATCCGAGGTCAACCACTAGAAAATATAGGGGTTTTAACGGCTAGCAG  
CCAGGGCCACCACACGAGCGAGAGAAATTACTACGCTGAGAGTGTACCCTAACTCCGCCAC  
TAACTTTGAGGAATACGCCGTAGATTCCCAACGCTAAGCAACAGGGGCTTAGGGGTCGAA  
ATGACGCTCGAATAGGCATGCCCACTAGAATACTAGTGGGCGCAATGTGCGTTCAAAGATT  
CGATGATTCACTGAATTCGCAATTCACATTACTTATCGCATTTTCGCTGCGTTCTTCATCGATG  
CCAGAACCAAGAGATCCGTTGTTGAAAGTTTTAACTTATTTTGGTTTAAAATCAGAGAAACA  
GTGGTAAAAACAAGAGTTTAAACGGTCCTTCGGCGGGCCGAAGCCGACTACAGGGTAGCTCC  
AGGGTAGCTCCAGGGTAGCTATAGGGTAGCTGCAGGGTAAGTGCAGGGTAGCTATAGGGTA

GCTATAGGGTAACTCTAGGGTAGCTCCAGGGTAGTTACAGGGTAGCCGTAGCTCACGCCGA  
GGCAACGATGGTAAGGTTACAAAGGGTTTGGAGTTTTGATAACTCAGTAATGATCCCTCCG  
CAGGTTACCCCTAACGGAA

>BSNB\_0050\_Xylariales\_sp

TAACTCCTGCTGCCTAATCCGAGGTCAACCACTAGAAAATATAGGGGTTTTAACGGCTAGCA  
GCCAGGGCCACCACACGAGCGAGAGAAATTACTACGCTGAGAGTGTACCCTAACTCCGCCA  
CTAACTTTGAGGAACTACGCCGTAGATTCCCAACGCTAAGCAACAGGGGCTTAGGGGTGCA  
AATGACGCTCGAATAGGCATGCCACTAGAATACTAGTGGGCGCAATGTGCGTTCAAAGAT  
TCGATGATTCACTGAATTCTGCAATTCACATTACTTATCGCATTTTCGCTGCGTTCTTCATCGAT  
GCCAGAACCAAGAGATCCGTTGTTGAAAAGTTTTAACTTATTTTGGTTTAAAATCAGAGAAAC  
AGTGGTAAAAACAAGAGTTTAAACGGTCCTTCGGCGGGCCGAAGCCGACTACAGGGTAGCTC  
CAGGGTAGCTCCAGGGTAGCTATAGGGTAGCTGCAGGGTAAGTGCAGGGTAGCTATAGGGT  
AGCTATAGGGTAACTCTAGGGTAGCTCCAGGGTAGTTACAGGGTAGCCGTAGCTCACGCCG  
AGGCAACGATGGTAAGGTTACAAAGGGTTTGGAGTTTTGATAACTCAGTAATGATCCCTCC  
GCAGGTTACCCCTACGGAAG

>BSNB\_0051\_Penicillium\_sp

NNNNNNNNNACCTACCTGATCCGAGGTCAACCGAAAAGGACGACAGCCCCGAAGGACCG  
CCGAGAAGGAAGACCAGCGCCGACCGAGTCCCTCCCGAGCGGGTGACAAAGCCCCATACG  
CTCGAGGACCCGACGCGCGCCGCCACTGCCTTTGGGGCGTGTTCCCGGGGGAACAGCGCC  
CAACACCCAGCCGTGCTGGAGGGCAGAAATGACGCTCGGACAGGCATGCCCTCCGGAATGC  
CAGAGGGCGCAATGTGCGTTCAAAGATTCGATGATTCACGGAATTCTGCAATTCACATTACT  
TATCGCATTTTCGCTGCGTTCTTCATCGATGCTGGAACCAAGAGATCCGTTGTTGAAAGTTTTA  
ATGATTCAATTCCACTCAGACTCACTATTCAGACAGGGTTCTCGGGCGCTTCGGCGGGCAGC  
GGCCCGGGGCAGATGCCCCCGGCGACCGGGGCCAGGCCCCAGTGGGCCCGCCGAGGCA  
ACGCGGTAAACAGTAAACACGGGTGGGAGGTTGGGCTCGTTGGAACCCGCACTCGGTAATGA  
TCCTTCCGCAGGTTACCTACGGAAGG

>BSNB\_0052\_Phomopsis\_sp

CCCGCATGCTACCTGATCCGAGGTCAAATTTTCAAAAAGTTGGGGGTTTAAACGGCAGGGCACC  
GCCAGGGCCTTCCAGAGCGAGGGTTTAACTACTGCGCTCGGGGTCTGGCGAGCTCGCCACT  
AGATTTACAGGGCCTGCTTCGTTAAAAGCAGTGCCCCAACACCAAGCAATGCTTGAGGGTTGA  
AATGACGCTCGAACAGGCATGCCCTCCGGAATACCAGAGGGCGCAATGTGCGTTCAAAGAT  
TCGATGATTCACTGAATTCTGCAATTCACATTACTTATCGCATTTTCGCTGCGTTCTTCATCGAT  
GCCAGAACCAAGAGATCCGTTGTTGAAAAGTTTTGATTCATTTGTGTTTTTCTCAGAGTTTCA  
GTGTAAAAACAGAGTTGACTTGGCCGCCGGCGTGCCGTCTCCTCACCGAAGTGAGGGGCCT  
ACTAGAGACCAGCATGCGCCGAGGCAACAAAAGGTATAAGTTCACAAAGGGTTTCTGGGTG  
CGCCTGGGGCGCGTTCCAGCAATGATCCCACCGCAGGTTACCCCTACGGGAA

>BSNB\_0055\_Phomopsis\_phyllanthicola

CTCGCGGCTGCTACCTGATCCGAGGTCAAATTTTCAAAAAGTTGGGGGTTTAAACGGCAGGGCA  
CCGCCAGGGCCTTCCAGAGCGAGGGTTTAACTACTGCGCTCGGGGTCTGGCGAGCTCGCCA  
CTAGATTTACAGGGCCTGCTTCGTTAGAAGCAGTGCCCCAACACCAAGCAATGCTTGAGGGTT  
GAAATGACGCTCGAACAGGCATGCCCTCCGGAATACCAGAGGGCGCAATGTGCGTTCAAAG  
ATTCGATGATTCACTGAATTCTGCAATTCACATTACTTATCGCATTTTCGCTGCGTTCTTCATCG  
ATGCCAGAACCAAGAGATCCGTTGTTGAAAAGTTTTGATTCATTTGTGTTTTTCTCAGAGTTT  
AGTGTA AAAACAAGAGTTAACTTGGCCGCCGGCGTGCCGTGCTCCCTGTCTCCAGGGGACCCC  
ATAGGGGCCAGCATGCGCCGAGGCAACAAAAGGTATAAGTTCACAAAGGGTTTCTGGGTGC  
GCCTGGGGCGCGTTCCAGCAATGATCCCACCGCAGGTTACCCCTACGGAA



>BSNB\_0056\_Xylaria\_cubensis

NNNNNGCGGAGGACTACCAATAAGCGGAGGAGCATATCTAATAAGCGGAGGAGCATGTCTC  
CGCCTMSGAGGAGCTTCTACCCTGGAGGAGGTACCCGGGAGGTGCGGATARRCCTGCCGGC  
GGCCACCAAACCTCTGTTTGATATTGAATTCTGAACCTATAACTAAATAAGTTAAAACCTTC  
AACAAACGGATCTCTTGGTTCTGGCATCGATGAAGAACGCAGCGAAATGCGATAAGTAATGT  
GAATTGCAGAATTCAGTGAATCATCGAATCTTTGAACGCATATTGCGCCCATTAGTATTCTA  
GTGGGCAGGACCGTTCGAGCGTCATTTGACCCCTTAAGCCTTAGTTGCTTAGTGTTGGGAGA  
CTACGGCAACGTAGCTCCTCAAAGTTAGTGGCGGAGTTGGTTCACACTCTAGACGTAGTAAT  
TTTTTATCTCGCCTATTAGTTGGACTGATCCCTGCCGTAAAACCCCAACTTCTCAAGGTTGA  
CCTCGAATCGGTTCAGACAACTCGCTAAATTGAAGCATATCAATAAGCGGAGGAA

>BSNB\_0057\_Phomopsis\_sp

CGAGTGACGCATGCTAGCATCGATCCATAGGTCAAATTTTCAAAAGTTGGGGGTTTAACGGC  
AGGGCACCGCCAGGGCCTTCCAAAGCGAGGGTTTAACTACTGCGCTCGGGGTCTGGCGAG  
CTCGCCACTAGATTTTACAGGGCCTGCCCTTTTACAGGCAGTGCCCCAACACCAAGCAATGCTT  
GAGGGTTGAAATGACGCTCGAACAGGCATGCCCTCCGGAATACCAGAGGGGCGCAATGTGCG  
TTCAAAGATTCGATGATTCAGTGAATTCTGCAATTCACATTACTTATCGCATTTTCGCTGCGTTC  
TTCATCGATGCCAGAACCAAGAGATCCGTTGTTGAAAGTTTTGATTCATTTGTGTTTTTCTCA  
GAGTTTCAGTGTAAAAACAAGAGTTAACTTGGCCGCCGGCGTGCCTGCTCCTTGTCTCCAAG  
GGACCCCGAGGGGGCCAGCATGCGCCGAGGCAACAGTAAGGTATAAGTTCACAAAGGGTT  
TCTGGGTGCGCTGGGGCGCGTTCCAGCAATGATCCCTCCGCAGGTTACCCCTACGGA

>BSNB\_0059\_Diaporthe\_phaseolorum

NNNNNNCTGGGACGCGCCCCAGGCGCACCCAGAAACCCCTTGTGAACTTATACCTTTTGT  
GCCTCGGCGCATGCTGGCCTCTAGTAGGCCCTCACCCCGGTGAGGAGAAGGCACGCCGGC  
GGCCAAGTTAACTCTTGTTTTTACACTGAACTCTGAGAAAAAACACAAATGAATCAAAACT  
TTCAACAACGGATCTCTTGGTTCTGGCATCGATGAAGAACGCAGCGAAATGCGATAAGTAA  
TGTGAATTGCAGAATTCAGTGAATCATCGAATCTTTGAACGCACATTGCGCCCTCTGGTATTC  
CGGAGGGCATGCCTGTTTCGAGCGTCATTTCAACCCTCAAGCATTGCTTGGTGTTGGGGCACT  
GCTTCTAACGAAGCAGGCCCTGAAATCTAGTGGCGAGCTCGCCAGGACCCCGAGCGTAGTA  
GTTAAACCCCTCGCTCTGGAAGGCCCTGGCGGTGCCCTGCCGTTAAACCCCCAACTTTTGA  
ATTTGACCTCGGATCAGGTAGGAATACCCGCTGAACTTAAGCATATCAATAAGCGGAGGAA

>BSNB\_0060\_Diaporthe\_phaseolorum

GAATGCTACCTGATCCGAGGTCAAATTTTCAAAAGTTGGGGGTTTAACGGCAGGGCACCGC  
CAGGGCCTTCCAGAGCGAGGGTTTAACTACTACGCTCGGGGTCTGGCGAGCTCGCCACTAG  
ATTTACAGGGCCTGCTTCGTTAGAAGCAGTGCCCCAACACCAAGCAATGCTTGAGGGTTGAAA  
TGACGCTCGAACAGGCATGCCCTCCGGAATACCAGAGGGGCGCAATGTGCGTTCAAAGATTC  
GATGATTCAGTGAATTCTGCAATTCACATTACTTATCGCATTTTCGCTGCGTTCTTCATCGATGC  
CAGAACCAAGAGATCCGTTGTTGAAAGTTTTGATTCATTTGTGTTTTTCTCAGAGTTTCAGT  
GTAAAAACAAGAGTTAACTTGGCCGCCGGCGTGCCTTCTCCTACCGGGGTGAGGGGCTA  
CTAGAGGCCAGCATGCGCCGAGGCAACAAAAGGTATAAGTTCACAAAGGGTTTCTGGGTGC  
GCCTGGGGCGCGTTCCAGCAATGATCCCTCCGCAGGTTCCCCCTACGGA

>BSNB\_0063\_Phomopsis\_sp

CTGTGCATGCTACCTGATCCGAGGTCAAATTTTCAAAAGTTGGGGGTTTAACGGCAGGGCAC  
CGCCAGGGCCTTCCAAAGCGAGGGTTTAACTACTGCGCTCGGGGTCTGGCGAGCTCGCCA  
CTAGATTTACAGGGCCTGCCCTTTTACAGGCAGTGCCCCAACACCAAGCAATGCTTGAGGGTT  
GAAATGACGCTCGAACAGGCATGCCCTCCGGAATACCAGAGGGGCGCAATGTGCGTTCAAAG  
ATTCGATGATTCAGTGAATTCTGCAATTCACATTACTTATCGCATTTTCGCTGCGTTCTTCATCG

ATGCCAGAACCAAGAGATCCGTTGTTGAAAGTTTGGATTCAATTTGTGTTTTTCTCAGAGTTTC  
AGTGTAACCAAGAGTTAACTTGGCCGCCGGCGTGCCTGCTCCTTGTCTCCAAGGGACCCC  
GAGGGGGCCAGCATGCGCCGAGGCAACAGTAAGGTATAAGTTCACAAAGGGTTTCTGGGTG  
CGCCTGGGGCGCGTTCCAGCAATGATCCCTCCGCAGGTTACACCTACGGAA

>BSNB\_0071\_Phomopsis\_sp

CTACCTGATCCGAGGTCAAATTTTCAAAAGTTGGGGGTTTAAACGGCAGGGCACCGCCAGGG  
CCTTCCAAAGCGAGGGTTTAACTACTGCGCTCGGGGTCTTGGCGAGCTCGCCACTAGATTTC  
AGGGCCTGCCCTTTTACAGGCAGTGCCCCAACACCAAGCAATGCTTGAGGGTTGAAATGAC  
GCTCGAACAGGCATGCCCTCCGGAATACCAGAGGGCGCAATGTGCGTTCAAAGATTTCGATG  
ATTCACTGAATTCTGCAATTCACATTACTTATCGCATTTTCGCTGCGTTCTTCATCGATGCCAG  
AACCAAGAGATCCGTTGTTGAAAGTTTGGATTCAATTTGTGTTTTTCTCAGAGTTTCAGTGTA  
AAACAAGAGTTAACTTGGCCGCCGGCGTGCCTGCTCCTTGTCTCCAAGGGACCCCGAGGGG  
GCCAGCATGCGCCGAGGCAACAGTAAGGTATAAGTTCACAAAGGGTTTCTGGGTGCGCCTG  
GGGCGCGTTCCAGCAATGATCCCTCCGCAGGTTACCTACGGAA

>BSNB\_0074\_Chaetomium\_sp

TATGCTACATGATCCGAGGTCAACCTTAAGATAAAGGGGTTTTACGGCCGGCACGCGCCGG  
GACGCCGCGAGCGAGGTGTATTACTGCGCTACGGGTCCAGGCGCGCCCGCCACTTCTTTTCA  
GGGCCCCGCGGCGGCCGCGGGGCCCAACACCGAGCAGGGCTCGAGGGTTGAAATGACGCT  
CGAACAGGCATGCCCGCCGGAATGCCGGCGGGCGCAATGTGCGTTCAAAGATTTCGATGATT  
CGCTGAGTTCTGCAATTCACATTACTTATCGCATTTTCGCTGCGTTCTTCATCGATGCCAGAAC  
CAAGAGATCCGTTGTTGAAAGTTTGAATCAATTTAGTGTCTTCTCAGAGGGGCCCTAAATCGCA  
AGAGTTGTGCTGCGCTGCCGCCGGCGGGCGCCCTTGC GGCTGCGGCCCTCCCCGGGGCCG  
CCCCCGGAAGCAACGAACAGTTGAAGAAACGTTACGGGTGTATTAAGGAGAATGGAATC  
GTTAATGATCCCTCCGCAGGTTACCTACGGAAGCC

>BSNB\_0075\_Xylaria\_sp

GTATCCTACCTGATCCGAGGTCAACCATAGAAAAAGTTTGGGGCTTTAATGGCGAGAGGGC  
CGGGGCGGCGTCCGAAGCGAGAGGAGATTCTACTACGCTTAGAGCACACCCTAGCTCTGCC  
AGCTAGCTTTGGGGAGCTGCGTCTTACGGCAGGCTCCCAACACCAAGCAACCAGGGCTTGA  
GGGTTGAAATGACGCTCGAACAGGCATGCCTACTAGAATACTAATAGGCGCAATGTGCGTT  
CAAAGATTTCGATGATTCACTGAATTCTGCAATTCACATTACTTATCGCATTTTCGCTGCGTTCT  
CATCGATGCCAGAACCAAGAGATCCGTTGTTGAAAGTTTGGATTATTATGTTTTGTTACTCAG  
AGTTCCACAGAAAAACAAGAGTTTAGTAGTCCACCGGCAGGCCAGCAAGCCCCTCGCGGGG  
TGCGCCCTGCCGAGGCAACAGAAGGTAAGTTCACATGGGTTGGGAGTTGTGATAACTCAGT  
AATGATCCCTCCGCAGGTTACCTACGGAA

>BSNB\_0076\_Acremonium\_sp

GGTATGCTACCTGATCTGAGGTCAACCTTGAGAAGTGGGGGTTTAAACGGCGTGTTCAACC  
GCTATCCTGCCGCGAGAGGTTTAACTTACTGCACGGAGGAGTTTCGCGAGGGAACCGCCACTG  
GATTTACAGGGCCAGCCGCCGAGGGCAGGCTGATCCCCAACGCCAGGTCCCGCGAACCG  
GTCCTGAGGGTTGAAATGACGCTCAGACAGGCATGCCCGCCAGAATACTGGCGGGCGCAAT  
GTGCGTTCAAAGATTTCGATGATTCACTGAATTCTGCAATTCACATTACTTATCGCATTTTGCT  
GCGTTCTTCATCGATGCCAGAACCAAGAGATCCGTTGCTGAAAGTTTGGATTATTGCTTAT  
GCCACTCAGAAATACACTAAAAGACAAGAGTTTGGAGCCTCCGGCGGACGCCTGGGTCCGG  
GCCGCGGAACGCGCCCGGGGCGAGGCCGCCGAAGCAACAGTGGTAGGTTACAATGGTTT  
GGGAGTTTTTACACTCGGTAATGATCCCTCCGCAGGTTACCCCTACGGAGG

>BSNB\_0077\_Pestalotiopsis\_microspora

ATGGGGTATCCTACCTGATCCGAGGTCAACCACAAAAAATTGGGGGTTTAGCGGCTGGGAG

TTATAGCACCTAACAAAAGCGAGAAAAAAATTACTACGCTCAGAGGATACTACAAATCCGC  
CGTTGTATTTTCAGGAACTACAACCTCCTAAGAGAAGTAGATTCCCAACACTAAGCTAGGCTTA  
AGGGTTGAAATGACGCTCGAACAGGCATGCCCACTAGAATACTAATGGGCGCAATGTGCGT  
TCAAAGATTTCGATGATTCACTGAATTCTGCAATTCACATTACTTATCGCATTTTCGCTGCGTTCT  
TCATCGATGCCAGAACCAAGAGATCCGTTGTTGAAAGTTTTGACTTATTAATAAAGACGCT  
CAGATTACATAAAATAACAAGAGTTTAATGGTCCATCGGCAGCAGCTATAAGAAGACCTAT  
AACTTCTGCCGAGGCAACAAAAGGTAAGTTCACATGGGTTGGGAGTTTAGAAAACTCTATA  
ATGATCCCTCCGCAGGTTACCCCTACGGAAG  
>BSNB\_0078\_Chaetomium\_sp

NNNNNNNNNNNTTATAGGTCTGCTTGTAGATAAAGGGGTTTTACGGCCGGCACGCGCCGG  
GACGCGCGAGCGAGGTGTATTACTGCGCTACGGGTCCAGGCGCGCCCGCCACTTCTTTTCA  
GGGCCCCGCGCGCGCGCGGGGCCCAACACCGAGCAGGGCTCGAGGGTTGAAATGACGCT  
CGAACAGGCATGCCCGCCGGAATGCCGCGGGCGCAATGTGCGTTCAAAGATTTCGATGATT  
CGCTGAGTTCTGCAATTCACATTACTTATCGCATTTTCGCTGCGTTCTTCATCGATGCCAGAAC  
CAAGAGATCCGTTGTTGAAAGTTTTGACTCATTTAGTGTCTTCTCAGAGGGGCCTAAATCGCA  
AGAGTTGTGCTGCGCTGCCGCGGGCGGGCGCCCTTGC GGCTGCGGCCCTCCCCGGGGCCG  
CCCCCGGAAGCAACGAACAGTTGAAGAAACGTTACGGGTGTATTAAGGAGAATGGAATC  
GTTAATGATCCCTCCGCAGGTTACCTACGGA  
>BSNB\_0085\_Colletotrichum\_gloeosporioides

TCGGGGTATCTACCTGATCCGAGGTCAACCTTTGGAAAATTGGGGGGTTTTACGGCAAGAGT  
CCCTCCGGATCCCAGTGCGAGACGTAAAGTTACTACGCAAAGGAGGCTCCGGGAGGGTCCG  
CCACTACCTTTGAGGGCCTACATCAGCTGTAGGGCCCCAACACCAAGCAGAGCTTGAGGGT  
TGAAATGACGCTCGAACAGGCATGCCCGCCAGAATGCTGGCGGGCGCAATGTGCGTTCAA  
GATTTCGATGATTCACTGAATTCTGCAATTCACATTACTTATCGCATTTTCGCTGCGTTCTTCATC  
GATGCCAGAACCAAGAGATCCGTTGTTAAAGTTTTGATTATTTGCTTGTACCACTCAGAAG  
AAACGTCGTTAAATCAGAGTTTGGTTATCTCCGGCGGGCGCCGACCCGCCCGGAGGCGGG  
AGGCCGGGAGGGTCCGCGAGACCCTACCCGCCGAAGCAACAGTTATAGGTATGTTACAAA  
GGGTTATAGAGCGTAAACTCAGTAATGATCCCTCCGCAGGTTACCCCTACGGA  
>BSNB\_0087\_Guignardia\_mangiferae

CTGCATGCTACATGATCCGAGGTCAACCTTGAAAAATAGACCGAAGGTCGATTGTCCGGC  
GGCCGTCGCCCAGCACTCCAAAGCGAGATATTTTACTACTACGCTCGAGGCTAGGACGCCGT  
CGCCGAGGTCTTCAAGGCACGTCCGGCAGCGGACGTTGCCCAATACCAAGCAGAGCTTGAG  
GGTTGAAATGACGCTCGAACAGGCATGCCCTCCGGAATACCAGAGGGCGCAATGTGCGTTC  
AAAGATTTCGATGATTCACTGAATTCTGCAATTCACATTACTTATCGCATTTTCGCTGCGTTCTTC  
ATCGATGCCAGAACCAAGAGATCCGTTGTTGAAAGTTTTAATCAATTAAATGATATATCAGG  
ACTTCACAAAATGAATTCTTGAGTTTTGTATACTGGCGGGCACTTAGCCGGGCGTCTGGCC  
AGTTAAGGCTGGGGGCGCCGCGCCCTGGGTCGGAACCAGGTCGACCCGCCAAAGCAACA  
TAGTGAGTACACAAGGGTGAGAAGGTCATTTCCGGCGTTGTAGCGCCTACTCTGGAACCTTTC  
AATAGAAGTTATTACATTTAGTAATGATCCTCCGCAGGTCACCCTACGGAAG  
>BSNB\_0088\_Xylaria\_cubensis

NNNNNNNNNGCTGAGCAGATTCGAGGTCAACCTTGAGAAGTTGGGGTTTTACGGCAGGGGA  
Ttagtccaaactaataggcgagataaaaaattactacgtctagagtgtgaaccaactccgcc  
actaaactttgaggagctacgttaccgtaggctcccaacactaagcaactaaggcttaaggg  
ttgaaatgacgctcgaaacggtcctgccccactagaataactaatgggcgcaatatgCGTTCAA  
AGATTTCGATGATTCACTGAATTCTGCAATTCACATTACTTATCGCATTTTCGCTGCGTTCTTCAT  
CGATGCCAGAACCAAGAGATCCGTTGTTGAAAGTTTTAACTTATTTAGTTATAGGTTACAGAA  
TTCAATATCAAACAGAGTTTGGTGGGCCGCCGGCAGGCTTACCCGCACCTCCCGGGTAAGTC

TTACAGGGTAAGACTACGAGGTAGGCGCGACCTGCCGAGGCAACGTTAGGTATGTTACAT  
GGGTTTGGGAGTTATAGAACTCTTTAATGATCCCTCCGCAGGTTACCTACGGAGGGA

>BSNB\_0089\_Xylaria\_cubensis

NNNNNNNNGCTGAACGATTCTTAGGTCGCCTTGAGAAGTTGGGGTTTTACGGCAGGGGATT  
AGTCCAATAATAGGCGAGATAAAAAATTACTACGTCTAGAGTGTGAACCAACTCCGCCAC  
TAACTTTGAGGAGCTACGTTACCGTAGGCTCCCAACACTAAGCAACTAAGGCTTAAGGGTTG  
AAATGACGCTCGAACGGTCCTGCCCCTAGAACTAATAATGGGCGCAATATGCGTTCAAAGA  
TTCGATGATTCACTGAATTCTGCAATTCACATTACTTATCGCATTTTCGCTGCGTTCTTCATCGA  
TGCCAGAACCAAGAGATCCGTTGTTGAAAGTTTTAACTTATTTAGTTATAGGTTCAGAATTCA  
ATATCAAACAGAGTTTGGTGGGCGCGCCGGCAGGCTTACCCGCACCTCCCGGGTAAGTCTTAC  
AGGGTAAGACTACGAGGTAGGCGCGACCTGCCGAGGCAACGTTAGGTATGTTACATGGGT  
TTGGGAGTTATAGAACTCTTTAATGATCCCTCCGCAGGTTACCTACGGAGGGA

>BSNB\_0090\_Xylaria\_cubensis

NNNNNNNNNNNNNNNCGCTTATGAGATATGCTTCGCAGAATTTGTGGGTTTGTACCCGTAG  
GGGTATTAGTCCAATAATAGGCGAGATAAAAAATTACTACGTCTAGAGTGTGAACCAACT  
CCGCCACTAACTTTGAGGAGCTACGTTACCGTAGGCTCCCAACACTAAGCAACTAAGGCTTA  
AGGGTTGAAATGACGCTCGAACGGTCCTGCCCCTAGAACTAATAATGGGCGCAATATGCGT  
TCAAAGATTTCGATGATTCACTGAATTCTGCAATTCACATTACTTATCGCATTTTCGCTGCGTTCT  
TCATCGATGCCAGAACCAAGAGATCCGTTGTTGAAAGTTTTAACTTATTTAGTTATAGGTTCA  
GAATTCAATATCAAACAGAGTTTGGTGGGCGCGCCGGCAGGCTTACCCGCACCTCCCGGGTA  
AGTCTTACAGGGTAAGACTACGAGGTAGGCGCGACCTGCCGAGGCAACGTTAGGTATGTTT  
ACATGGGTTTGGGAGTTATAGAACTCTTTAATGATCCCTCCGCAGGTTACCTACGGAGGGA

>BSNB\_0091\_Xylaria\_cubensis

NNNNNNNNNGAACATCCGCTTATTGATATGCTCCTCCGCTTATTGATATGCTCCTCCGCTTA  
TTGATATGCTCCTCCGCTTATAGATATGTTTCTCCGCTTATWGWGAGGAYCCTCTCTYCTCT  
AACTGTGAGGAGCTACGTTACCGTGGGCTCCCAACACTAAGCAACTAAGGCTTAAGGGTTG  
AAATGACGCTCGAACGGTCCTGCCCCTAGAACTAATAATGGGCGCAATATGCGTTCAAAGA  
TTCGATGATTCACTGAATTCTGCAATTCACATTACTTATCGCATTTTCGCTGCGTTCTTCATCGA  
TGCCAGAACCAAGAGATCCGTTGTTGAAAGTTTTAACTTATTTAGTTATAGGTTCAGAATTCA  
ATATCAAACAGAGTTTGGTGGGCGCGCCGGCAGGCTTACCCGCACCTCCCGGGTAAGTCTTAC  
AGGGTAAGACTACGAGGTAGGCGCGACCTGCCGAGGCAACGTTAGGTATGTTACATGGGT  
TTGGGAGTTATAGAACTCTTTAATGATCCCTCCGCAGGTTACCTACGGAGGGA

>BSNB\_0093\_Colletotrichum\_sp

TTGAGTCTGCTACCTGATCCGAGGTCAACCTTTGGAAAATTGGGGGTTTAACGGCTAGAGTC  
CCTCCGAATCCCAGTGCAGACAAAAGTTACTACGCAAAGGAGGCTCCGAGAGGGTCCGCC  
ACTACCTTTGAGGGCCTACGTCAACCGTAGAGCCCCAACGCCAAGCAGTGCTTGAGGGTTG  
AAATGACGCTCGAACAGGCATGCCCGCCAGAATGCTGGCGGGCGCAATGTGCGTTCAAAGA  
TTCGATGATTCACTGAATTCTGCAATTCACATTACTTATCGCATTTTCGCTGCGTTCTTCATCGA  
TGCCAGAACCAAGAGATCCGTTGTTAAAAGTTTTGATTATTTGCTTGTGCCACTCAGAAGAA  
ACGTCGTTAAATCAGAGTTTGGTTATCCTCCGGCGGACACCCCGCAGAGCGGGGCCGGGGG  
CCCGGGAGCCGTCCGCCGAAGCAACAGTTAGGTATGTTACAAAGGGTTATAGAGCGGTAA  
CTCAGTAATGATCCCTCAGCAGGTTACCCCTACGGAA

>BSNB\_0094\_Diaporthe\_phaseolorum

CTCGCATAGCTACATCGATTCTAGGTCAAATTTTCAAAGTTGGGGGTTTAACGGCAGGGC  
ACCGCCAGGGCCTTCCAGAGCGAGGGTTTAACTACTACGCTCGGGGTCCTGGCGAGCTCGC  
CACTAGATTTACAGGGCCTGCTTCGTTAGAAGCAGTGCCCCAACACCAAGCAATGCTTGAGG

GTTGAAATGACGCTCGAACAGGCATGCCCTCCGGAATACCAGAGGGCGCAATGTGCGTTCA  
AAGATTCGATGATTCACTGAATTCTGCAATTCACATTACTTATCGCATTTTCGCTGCGTTCTTCA  
TCGATGCCAGAACCAAGAGATCCGTTGTTGAAAGTTTTGATTCATTTGTGTTTTTCTCAGAG  
TTTCAGTGTAACCAAGAGTTAACTTGGCCGCCGGCGTGCCTTCTCCTCACCGGGGTGAGG  
GGCCTACTAGAGGCCAGCATGCGCCGAGGCAACAAAAGGTATAAGTTCACAAAGGGTTTCT  
GGGTGCGCCTGGGGCGCGTTCCAGCAATGATCCCTCCGCAGGTTACCCCTACGGAA  
>BSNB\_0096\_Diaporthe\_sp

GCGCATAGCTGCATGATCCGTAGGTCAAAATTTACAGAAGTTGGGGGTTTAACGGCAGGGC  
GCCGCCAGGGCCTTCCAGAACGAGATATACTACTACGCTCGGGGTCCTAGCGAGCTCGCC  
ACTAGATTTACAGGGCCTGCCCTTTTACAGGCAGTGCCCCAACCAAGCCAGGCTTGAGGGT  
TGAAATGACGCTCGAACAGGCATGCCCTCCGGAATACCAGAGGGCGCAATGTGCGTTCAAA  
GATTCGATGATTCACTGAATTCTGCAATTCACATTACTTATCGCATTTTCGCTGCGTTCTTCATC  
GATGCCAGAACCAAGAGATCCGTTGTTGAAAGTTTTGATTCATTTATGTTTTTACTCAGAGA  
TTACTAAGAAACAAGAGTTTGGTTGGCCGCCGGCGGGCTGCTCCCTGTTCCCAGGGGGCCT  
CAGGAGAGAGGCCGGCCTTCGCCGAGGCAACAATAGGTATAAGTTCACAAAGGGTTTCTGG  
GTGCGCCGAGGCGCGTTCCAGCAATGATCCCTCCGCAGGTTACCCCTACGGAAG  
>BSNB\_0098\_Colletotrichum\_sp

TGCAGATGCTACCTGATCCGAGGTCAACCTTTGGAAAATTGGGGGTTTAACGGCTAGAGTCC  
CTCCGAATCCCAGTGCGAGACAAAAGTTACTACGCAAAGGAGGCTCCGAGAGGGTCCGCCA  
CTACCTTTGAGGGCCTACGTCAACCGTAGAGCCCCAACGCCAAGCAGTGCTTGAGGGTTGA  
AATGACGCTCGAACAGGCATGCCCGCCAGAAATGCTGGCGGGCGCAATGTGCGTTCAAAGAT  
TCGATGATTCACTGAATTCTGCAATTCACATTACTTATCGCATTTTCGCTGCGTTCTTCATCGAT  
GCCAGAACCAAGAGATCCGTTGTTAAAAGTTTTGATTATTTGCTTGCTGCACTCAGAAGAAA  
CGTCGTTAAATCAGAGTTTGGTTATCCTCCGGCGGACACCCCGCAGAGCGGGGGCCGGGGC  
CCGGGAGCCGTCCGCCGAAGCAACAGTTAGGTATGTTCAAAAGGGTTATAGAGCGGTAAC  
TCAGTAATGATCCCTCCAGCAGAGTTACCCCTACGGGAA  
>BSNB\_0100\_Diaporthe\_sp

CGAAGAAAGCCTGCTGCAATGATCCGAGGTCTAAATTTCAGAAGTTGGGGGTTTAACGGCA  
GGGCGCCGCCAGGGCCTTCCAGAACGAGATATACTACTACGCTCGGGGTCCTAGCGAGCT  
CGCCACTAGATTTACAGGGCCTGCCCTTTTACAGGCAGTGCCCCAACACCAAGCCAGGCTTGA  
GGGTTGAAATGACGCTCGAACAGGCATGCCCTCCGGAATACCAGAGGGCGCAATGTGCGTT  
CAAAGATTCGATGATTCACTGAATTCTGCAATTCACATTACTTATCGCATTTTCGCTGCGTTCTT  
CATCGATGCCAGAACCAAGAGATCCGTTGTTGAAAGTTTTGATTCATTTATGTTTTTACTCA  
GAGATTCATAAGAAACAAGAGTTTGGTTGGCCGCCGGCGGGCTGCTCCCTGTTCCCAGGG  
GGCCTCAGGAGAGAGGCCGGCCTTCGCCGAGGCAACAATAGGTATAAGTTCACAAAGGGTT  
TCTGGGTGCGCCGAGGCGCGTTCCAGCAATGATCCCTCCGCAGGTTCCCCCTACGGAAG  
>BSNB\_0102\_Pestalotiopsis\_sp

ATTGGGTATCCTACCTGATCCGAGGTCAACCCAGTAAAAAAGTTGGGGGTTTAGCGGCGAG  
GGCCACGGCACCTACAGAAGCGAGAGGTATATTACTGCGCTCAGAGGTAGAACCGTCACTC  
CGCCGGTGAAATTTGAGGAGCTACAGGGTAACAGCTACAGGGTAGCTCCCGGGTAGTCTCCC  
AACGCCAAGACTAGGTCTTGAGTGGTACTAATGACGCTCGAACAGGCATGCCCTCCAGAAT  
GCTGGGGGGCGCAATGTGCGTTCAAAGATTCGATGATTCACTGAATTCTGCAATTCACATTA  
CTTATCGCATTTTCGCTGCGTTCTTCATCGATGCCAGAACCAAGAGATCCGTTGTTAAAGGTTT  
TGACTTATTTTCATAAGACTCTCAGATGATAATAACAAATAGTTTGGCTTTCCACCGGCGG  
TCCGCCCCGCTACAGGGTAAGCTGCAGGGTAAGACCGCCGAGGCAACGTAAGGTATAGGTTT  
ACAAATGGTTTATACAGGAGTGTTTAAATACTCTGTAATGATCCCTCCGCAGGTTACCCCTAC  
GGAA

>BSNB\_0103\_Xylaria\_cubensis

NNNNNNNGGAGGAGGAACCATCCTATGCGGAGGTACCTATACAGTTGGCGGAGGGGTCGY  
GCCTACCTCGAAGTCTTACMCTGTAAGACTTACCCGGGAGGTGCGGGTAAGCCTGCCGGCG  
CCCCACCAAACCTCTGTTTGATATTGAATTCTGAACCTATAACTAAATAAGTTAAACCTTCA  
ACAACGGATCTCTTGGTTCTGGCATCGATGAAGAACGCAGCGAAATGCGATAAGTAATGTG  
AATTGCAGAAATTCAGTGAATCATCGAATCTTTGAACGCATATTGCGCCATTAGTATTCTAGT  
GGGCAGGACCGTTCGAGCGTCATTTCAACCCTTAAGCCTTAGTTGCTTAGTGTTGGGAGCCT  
ACGGTAACGTAGCTCCTCAAAGTTAGTGGCGGAGTTGGTTCACACTCTAGACGTAGTAATTT  
TTTATCTCGCCTATTAGTTGGACTAATCCCTGCCGTAAAACCCCAACTTCTCAAGGTTGACC  
TCGAATCGGTTTCAGACAACTCGCTAAATTGAAGCATATCAATAAGCGGAGGAA

>BSNB\_0106\_Xylaria\_cubensis

CGCTGTGCTACTGCACGGMTTTAGTTGCTTTGAGAATTGGGGGTTTCCCKGGGGGACMGM  
CAAGTAATARGGAGAAAAAAATACTMCRCCTAGAGGGGGAACAGCTCCGYCCCTAACT  
TCGAGGAGCTACCTTACCGWASGGTCCGGMCACTAARCAACTAAGGSTTAGGGGGTGAAAT  
GACGCTCSAACGGGGCTGCCCCCTARAATACTAATGGGGGCAATAGGGGTTTMAAGAATCS  
ATGATTCCCTGAATTCTGCMATTACATTACTTATCGCATTTCSCTGCSTTCTTCCTCGATGCC  
MRAACCMARAGATCCSTTGTTGAAAGTTTAACTTATTTTRSTTATAGGTTTCAAGTAATCAATAT  
CAAACARAGTTWGGTGGGCCGCCGGCAGGCTTACCCGCACCTCCCGGGTARGTCTTACAGG  
GKAAGTCTACGAGGTASGCGCSACCTGCCGAGGCAACGTTAGGTATGTTTACATGGGTTTGG  
GAGTTATARAACCTCTTTAWTGATCCCYCCGAGGTTTCWCCTACGGAGGK

>BSNB\_0107\_Muscodor\_sp

CTACCTGATCCGAGGTCAACCTTTGTATAAGGGGTTTACGGCAGGGGCCGGGACCACTACA  
GAAGCGAGATATAATTACTACGCTTAGAGTGAGAACCAACTCCGCCAATCACTTTAAGGAG  
CTACGGGGCCGTGCCGTAGGCTCCCAACGCTAAGCAACAAGGCTTAAGTGGTGAAATGACGC  
TCGAACAGGCATGCCCACTAGAATGCTAATGGGCGCAATGTGCGTTCAAAGATTTCGATGATT  
CACTGAATTCTGCAATTCACATTACTTATCGCATTTTCGCTGCGTTCTTCATCGATGCCAGAAC  
CAAGAGATCCGTTGTTGAAAGTTTAACTTATTAAGTTTGTATTTCAGAAATCCAAAGAAAA  
CAGAGTTTAGTTGGCCGCCGGCGGGGATGACTACCGGGTAGCTGATGTACCTGAAACTACA  
GGGTAACCACTAAGTGGTATTCTCCCGCAGGGTAGCCTCCGCCGCCGAAGCAACAAAGGTA  
AGTTCACATAGGGTTGGGAGTTTAGAAAACCTCTGTAATGATCCCTCCGCAGGTTTACCCTAC  
GGAAA

>BSNB\_0115\_Guignardia\_mangiferae

CCTACCTGATCCGAGGTCAACCTTGGA AAAATAGACCGAAGGTCGATTGTCCGGCGGCCGT  
CGCCCAGCACTCCAAAGCGAGATATTTTACTACTACGCTCGAGGCTAGGACGCCGTGCGCG  
AGGTCTTCAAGGCACGTCCGGCAGCGGACGTTGCCCAATACCAAGCAGAGCTTGAGGGTTG  
AAATGACGCTCGAACAGGCATGCCCTCCGGAATACCAGAGGGCGCAATGTGCGTTCAAAGA  
TTCGATGATTCACTGAATTCTGCAATTCACATTACTTATCGCATTTTCGCTGCGTTCTTCATCGA  
TGCCAGAACCAAGAGATCCGTTGTTGAAAGTTTAAATCAATTAATGATATATCAGGACTTC  
ACAAAATGAATTCTTGAGTTTGTATACTGGCGGGCACTTAGCCGGGGCGTCTGGCCAGTTA  
AGGCTGGGGGGCGCCGCCGCTGGGTGCGAACAGGTCGACCCGCCAAAGCAACATAGTG  
AGTACACAAGGGTGAGAAGGTCATTTCCGGCGTTGTAGCGCCTACTCTGGAACCTTTCAATAG  
AAGTTATTACATTTTCAAGTAATGATCCTTCCGCAGGTTTACCTACGGAAGG

>BSNB\_0118\_Colletotrichum\_gloeosporioides

GGGGTATTCTACCTGATCCGAGGTCAACCTTTAGAAAATTGGGGGTTTAAACGGCTAGAATC  
CCTCCGAATCCCAGTGCGAGACAAAAGTTACTACGCAAAGGAGGCTCCGAGAGGGTCCGCC  
ACTAGTTTTGGGGGCCTACGTCAACCGTAGAGCCCCAACACCAAGCAGTGCTTGAGGGTTG

AAATGACGCTCGAACAGGCATGCCCCGCCAGAATGCTGGCGGGCGCAATGTGCGTTCAAAGA  
TTCGATGATTCACTGAATTCTGCAATTCACATTACTTATCGCATTTGCTGCGTTCTTCATCGA  
TGCCAGAACCAAGAGATCCGTTGTTAAAAGTTTTGATTATTTGCTTGTGCCACTCAGAAGAA  
ACGTCGTTAAATCAGAGTTTGGTTATCCTCCGGCGGACGCCCCGCGTGAGCGGGGCCGGGG  
GCCCCGGGGGGCCGACCGCCGAAGCAACATGTAGGTATGTTTACAAAGGGTTATAGAGTGGT  
AACTCGATAATGATCCCTCCGCAGGTTACCTACGGAAG

>BSNB\_0121\_Xylaria\_cubensis

CNGNGCGATTTCGAGGTCAACCTTGAGAAGTTGGGGTTTTACGGCAGGGGATCAGTCCA  
AATAGGCGAGATAAAAAATTACTACGTCTAGAGTGTGAACCAACTCCGCCACTAACTTTGA  
GGAGCTACGTTACCGTAGGCTCCCAACACTAAGCAACTAAGGCTTAAGGGTTGAAATGACG  
CTCGAACGGTCCTGCCCACTAGAATACTAATGGGCGCAATATGCGTTCAAAGATTTCGATGAT  
TCACTGAATTCTGCAATTCACATTACTTATCGCATTTGCTGCGTTCTTCATCGATGCCAGAA  
CCAAGAGATCCGTTGTTGAAAGTTTTAACTTATTTAGTTATAGGTTTCAAGATTCAATATCAA  
CAGAGTTTGGTGGGCGCGGCGGAGGCTTACCCGCACCTCCCGGGTAAGTCTTACAGGGTAA  
GACTACGAGGTAGGCGCGACCTGCCGAGGCAACGTTAGGTATGTTTACATGGGTTTGGGAG  
TTATAGAACTCTTTAATGATCCCTCCGCAGGTTACCTACGGANG

>BSNB\_0122\_Cystobasidium\_minutum

TCTGACTGATTTGAGATCTAAAGCTTAAAGTGCTATAAAAGCGCATTAGAAGCACCTCTTAT  
ATTTGAAGAAGACGTCCTTAGCGAAATAATTATTACGCCAAGTCAAACCGTCTATTTCAATA  
GGGTTGCTCGTGTATTTCAAGTTGAGCCGGCAATTACGCCGACAGACAACCATAATCCAAGCC  
CACGCCCATTTCATTACAAAATAGGGGGGTTGAGAGTTTCATGATACTCAAACAGACATACT  
CTTCGGAATACCAAAGAGTGCAAGGTGCGTTCAAAGATTTCGATGATTCACTGAATTCTGCAA  
TTCACATTACTTATCGCAATTGCTGCGTTCTTCATCGATGCGAGAGCCAAGAGATCCGTTGC  
TGAAAGTTTTGTTTTTGTATGCTCAATTAAGAGACTATTACATTCTTATACTAATGTGTAA  
AAGTGTGTGTAAGAAAGAGTGTGTGCACAGTGTAAGAAAATGAAATGGTCGGACTTCTAAA  
AAGAACGTCCTAAAATTCATTAATGATCCTTCCGCAGGTTACCTACGGAAGG

>BSNB\_0123\_Xylaria\_sp

TTCCTCTGCGCGATTMAAGTCAGCTTTGAAAKTTGGGGGTTTTCCGGACGKGAACRCTCCRM  
GCTCCCGGNGAGAGAAAAGTTACTACKGCKARAGAGAGGCCCCCTCCACACCGCCCTGKATT  
TCCGGGCGCGCCTCCCGCTCCCAGGGCTCCCCAAGTCCCMTTAMCGACCCCCCTGACGGG  
TTCAACGGGCCTGCCCMCTCTAATACTAGGGGGCCAATATGAATACTGGSATTCGATGATTC  
CCTGAATTCATTAATTCACATTACTTATTCTGTTTCGCTGCTACCTTCCTCAATGCCCTAACCA  
CTARATCCATTGTTGAAACTTTTAATTTATTTATGAATAKGTTCATAAATCAATATCTWACAC  
ASWTAGGTGGGCCACCKGCAGGCTTATCCGCRCTCCCGAGWAAATCTTGCWKGGTACCAC  
TACMRGGYACCTGCKACCTGCCSAGGCAACSTTAAGTATGTTTACATGGGTTTGGGAGTTAT  
ATAACTCTTTAATGATCCCTCCGCAGGATCRCTACSGAGG

>BSNB\_0124\_Colletotrichum\_sp

CTACCTGATCCGAGGTCAACCTTTGAAAAATTGGGGGGTTTTACGGCAAGAGTCCCTCCGGA  
TCCCAGTGCGAGACGTAAAGTTACTACGCAAAGGAGGCTCCGGGAGGGTCCGCCACTACCT  
TTGAGGGCCTACATCAGCTGTAGGGCCCCAACACCAAGCAGAGCTTGAGGGTTGAAATGAC  
GCTCGAACAGGCATGCCCCGCCAGAATGCTGGCGGGCGCAATGTGCGTTCAAAGATTTCGATG  
ATTCATGAATTCTGCAATTCACATTACTTATCGCATTTGCTGCGTTCTTCATCGATGCCAG  
AACCAAGAGATCCGTTGTTAAAAGTTTTGATTATTTGCTTGTACCACTCAGAAGAAACGTCG  
TTAAATCAGAGTTTGGTTATCCTCCGGCGGGCGCCGACCCGCCCCGGGGGGGGCGGGAGGCCG  
GGAGGGTCACGGGGACCTACCCGCCGAAGCAACAGTTGTAGGTATGTTTACAAAGGGTTG  
TAGAGCGTAAACTCAGTAATCATCCCTCCGCAGGTTACCTACGGAA

>BSNB\_0125\_Candida\_etchellsii

CTTGCTTGATTGGGGGCCATAAAAAATATTACTGCACAGAGTTATTAACGTGTGCTGTTCCAT  
TTCTTTGACTCCAATAAGGAGCAACACCTCGTAATCCACAAGAAGTAGATTAGAGAGAAAG  
TTCGGCGCTCCAACAAGCATGCTACTAGGAGATCCTAGAAAGCGCAATGTGCGTTCAAAGAT  
TCAATGACTCACGTCTGCAATTCGCATTACCTATCGCGCTTTGCTGCGTTCTTCATCGATGTG  
AGAACCAAGAGATCCGTTGTTGAAAGTTTTAAATTTTCAAGTTTTTCAGATAAAATTGGTAAAA  
GTTTAAAAGTTGGGTAGAGCTAGGCTCCACCCAAGCAGTGCCTTCCACGCTTGCGCGCTTCT  
GGCGTTTCACAATGTCGGCGTGTAGCCTTCAAAAATGATCCTTCCGCAGGTTACCTACGGA  
AG

>BSNB\_0132\_Colletotrichum\_gloeosporioides

CTACCTGATCCGAGGTCAACCTTTGGAAAATTGGGGGGTTTTACGGCAAGAGTCCCTCCGGA  
TCCCAGTGCGAGACGTAAAGTTACTACGCAAAGGAGGCTCCGGGAGGGTCCGCCACTACCT  
TTGAGGGCCTACATCAGCTGTAGGGCCCCAACACCAAGCAGAGCTTGAGGGTTGAAATGAC  
GCTCGAACAGGCATGCCCCGCCAGAATGCTGGCGGGCGCAATGTGCGTTCAAAGATTTCGATG  
ATTCACTGAATTCTGCAATTCACATTACTTATCGCATTTTCGCTGCGTTCTTCATCGATGCCAG  
AACCAAGAGATCCGTTGTAAAAGTTTTGATTATTTGCTTGTACCACTCAGAAGAAACGTCG  
TTAAATCAGAGTTTGGTTATCCTCCGGCGGGCGCCGACCCGCCCGGGGGCGGGAGGCCGGG  
AGGGTCACGGAGACCCTACCCGCCGAAGCAACAGTTATAGGTATGTTACAAAGGGTTGTA  
GAGCGTAAACTCAGTAATGATCCCTACGCAGGTTACCTACGGAA

>BSNB\_0133\_Colletotrichum\_gloeosporioides

CTACCTGATCCGAGGTCAACCTTTGGAAAATTGGGGGGTTTTACGGCAAGAGTCCCTCCGGA  
TCCCAGTGCGAGACGTAAAGTTACTACGCAAAGGAGGCTCCGGGAGGGTCCGCCACTACCT  
TTGAGGGCCTACATCAGCTGTAGGGCCCCAACACCAAGCAGAGCTTGAGGGTTGAAATGAC  
GCTCGAACAGGCATGCCCCGCCAGAATGCTGGCGGGCGCAATGTGCGTTCAAAGATTTCGATG  
ATTCACTGAATTCTGCAATTCACATTACTTATCGCATTTTCGCTGCGTTCTTCATCGATGCCAG  
AACCAAGAGATCCGTTGTAAAAGTTTTGATTATTTGCTTGTACCACTCAGAAGAAACGTCG  
TTAAATCAGAGTTTGGTTATCCTCCGGCGGGCGCCGACCCGCCCGGGGGCGGGAGGCCGGG  
AGGGTCACGGAGACCCTACCCGCCGAAGCAACAGTTATAGGTATGTTACAAAGGGTTGTA  
GAGCGTAAACTCAGTAATGATCCATCCGCAGGTTACCTACGGAA

>BSNB\_0135\_Guignardia\_mangiferae

GTATCCCTRCTGATCCGAGGTCAACCTTTGGAAAATAGACCGAAGGTTCGATTGTCCGGCGG  
CCGTCGCCCAGCACTCCAAAGCGAGATATTTTACTACTACGCTCGAGGCTAGGACGCCGTCG  
CCGAGGTCTTCAAGGCACGTCCGGCAGCGGACGTTGCCCAATACCAAGCAGAGCTTGAGGG  
TTGAAATGACGCTCGAACAGGCATGCCCTCCGGAATACCAGAGGGCGCAATGTGCGTTCAA  
AGATTCGATGATTCACTGAATTCTGCAATTCACATTACTTATCGCATTTTCGCTGCGTTCTTCAT  
CGATGCCAGAACCAAGAGATCCGTTGTTGAAAGTTTTAATCAATTAAATGATATATCAGGAC  
TTCACAAAATGAATTCTTGAGTTTTGTATACTGGCGGGCACTTAGCCGGGCGTCCTGGCCAGT  
TAAGGCTGGGGGCGCCGCGCCTGGGTCCGAACAGGTCGACCCGCCAAAGCAACATAG  
TGAGTACACAAGGGTGAGAAGGTCATTTTCGGCGTTGTAGCGCCTACTCTGGAACCTTTCAAT  
AGAAGTTATTACATTTTCAGTAATGATCCTTCCGCAGGTTACCTACGGAAGG

>BSNB\_0154\_Rhizomucor\_variabilis

TTTGAGTATGCTTCTCAGCATATTTCTAATTTACTGTGAACTGTTTTACTGTTTAGCGTTTTGAG  
GGATTGCCTAAAGATTATAGGGATAGGCTTTTAGGATGTTAACCTAGCTAAAGTCAGGCTTA  
GGCCTGGTATCCTAATTCATTATTTACCAAAAGAATTCAGAAATTAATTATTGTAACATAAGC  
GTAAAAAACTTATAAAACAACCTTTTAAACAACGGATCTCTTGTTCTCGCATCGATGAAGAAC  
GTAGCAAAGTGCGATAACTAGTGTGAATTGCATATTCAGTGAATCATCGAGTCTTTGAACGC



ATCTTGCGCTCAATGGTATTCCATTGAGCACGCCTGTTTCAGTATCAACAACAACCCACATC  
CACAATTTTGTGTGAATGGAAATGAGAGTAATCGACGTTAAAATTGAACTCTTTAAAATTA  
TTAGGCCTGAACTATTGTTCTTTTAGCCTGAACATTTTTTTTAAATATAAAGGAATGCTCTAGTT  
ATTAAGACTGTCTTGGGGGCCTCCCAAATAAATCATTTTTTTAACTTGATCTGAAATCAGGTG  
GGATTACCCGCTGAACTTAAGCATATCAATAAGCGGAGGAA

>BSNB\_0155\_Rhizomucor\_variabilis

TTTAGAGTATGCTTCTCAGCATATTTCTAATTTACTGTGAACTGTTTTACTGTTTAGCGTTTTG  
AGGGATTGCCTAAAGATTATAGGGATAGGTCTTTAGGATGTAAACCTAGCTAAAGTCAGGCT  
TAGGCCTGGTATCCTAATTCATTATTTACCAAAAAGAAATTCAGAATTAATTATTGTAACATAAG  
CGTAAAAAACTTATAAAACAACCTTTTAACAACGGATCTCTTGGTTCTCGCATCGATGAAGAA  
CGTAGCAAAGTGCGATAACTAGTGTGAATTGCATATTCAGTGAATCATCGAGTCTTTGAACG  
CATCTTGCGCTCAATGGTATTCCATTGAGCACGCCTGTTTCAGTATCAACAACAACCCACAT  
CCACAATTTTGTGTGAATGGAAATGAGAGTAATCGACGTTAAAATTGAACTCTTTAAAATT  
ATTAGGCCTGAACTATTGTTCTTTTAGCCTGAACATTTTTTTTAAATATAAAGGAATGCTCTAGT  
TATTAAGACTGTCTTGGGGGCCTCCCAAATAAATCATTTTTTTAACTTGATCTGAAATCAGGT  
GGGATTACCCGCTGAACTTAAGCATATCAATAAGGCGGAGGAA

>BSNB\_0167\_Penicillium\_shearii

TCTGGGTCAACCTCCCACCCGTGTTTAACGAACCTTGTGTGCTTCGGCGGGGCCCGCCTCACGGC  
CGCCGGGGGGCATMSGCGCCCGGGCCCGCGCCCGCCRAAGACACCTGTGAACTCTGTCTGA  
AGTTGCASYCTGAGAACTATTTAAATTAGTTMAAACTTTCAACSACGGATCTCTTGGTTCCG  
GCMTCGATGAASAACMCASCSAAATGCSATAAATAATGTGAATTGCASAATTCAGTGAATCA  
TCRAGTCTTTGAACSCACATTGCKCCCTCTGGTATTCCGGARGGCMTCCTGTCCGAGCGTC  
WTTGCTGCCCTCAMGCACGGCTTGTGTGTTGGGACCCGKCTTACCCCTCCCGGGGGGACAG  
GGCCRAARAGSCACSGMKGCATCGCGTSCCGMWCTCCATCTTATGG

>BSNB\_0168\_Penicillium\_simplicissimum

AGGTTTCCGTAGGTGAACCTGCGGAAGGATCATTACCGAGTGAGGGCCCTCTGGGTCCAAC  
CTCCCACCCGTGTTTATCGTACCTTGTGTGCTTCGGCGGGGCCCGCCTCACGGCCGCGGGGGG  
CATCCGCTCCCGGGCCCGCGCCCGCCGAAGACACCAATGAACTCTGTCTGAAGATTGCAGT  
CTGAGCAGATTAGCTAAATCAGTTAAACTTTCAACAACGGATCTCTTGGTTCCGGCATCGA  
TGAAGAACGCAGCGAAATGCGATACGTAATGTGAATTGCAGAATTCAGTGAATCATCGAGT  
CTTTGAACGCACATTGCGCCCCCTGGTATTCCGGGGGGCATGCCTGTCCGAGCGTCATTGCT  
GCCCTCAAGCACGGCTTGTGTGTTGGGCTCCGCCCCCGGCTCCCGGGGGGCGGGCCCGAA  
AGGCAGCGGCGGCACCGCGTCCGGTCCGAGCGTATGGGGCTTCGTACCCGCTCTGTAGG  
CCCGGCCGGCGCCCGCGGCGACCCCAATCAATCTATCCAGGTTGACCTCGGATCCAGGGT  
AGGGATCCCA

>BSNB\_0174\_Candida\_tropicalis

CACCACATGTGTTTTTTATTGAACAAATTTCTTTGGTGGCGGGAGCAATCCTACCGCCAGAG  
GTTATAACTAAACCAAACTTTTTATTTACAGTCAAACCTTGATTTATTATTACAATAGTCAAAA  
CTTTCAACAACGGATCTCTTGGTTCTCGCATCGATGAAGAACGCAGCGAAATGCGATACGTA  
ATATGAATTGCAGATATTCGTGAATCATCGAATCTTTGAACGCACATTGCGCCCTTTGGTATT  
CCAAAGGGCATGCCTGTTTGAGCGTCATTTCTCCCTCAAACCCCCGGGTTTGGTGTGAGCA  
ATACGCTAGGTTTGTGTTGAAAGAATTTAACGTGGAACTTATTTTAAGCGACTTAGGTTTATC  
CAAAAMCSTTWATTTGGCTRKGGGCCCCCMCAATTTTTTTCKWACCTTGAACCTMAATTAGG  
GWAGAACTCCCCSTTAAATTTARSCTAATCATSAAGCGAAGAA

>BSNB\_0175\_Rhizomucor\_variabilis

TTTAGAGTATGCTTCTCAGCATATTTCTAATTTACTGTGAACTGTTTTACTGTTTAGCGTTTTG  
AGGGATTGCCTAAAGATTATAGGGATAGGTCTTTAGGATGTTAACCTAGCTAAAGTCAGGCT  
TAGGCCTGGTATCCTAATTCATTATTTACCAAAAGAATTCAGAATTAATTATTGTAACATAAG  
CGTAAAAAACTTATAAAACAACCTTTTAACAACGGATCTCTTGGTTCTCGCATCGATGAAGAA  
CGTAGCAAAGTGCGATAACTAGTGTGAATTGCATATTCAGTGAATCATCGAGTCTTTGAACG  
CATCTTGCGCTCAATGGTATTCCATTGAGCACGCCTGTTTCAGTATCAACAACAACCCACAT  
CCACAATTTTGTGTGAATGGAAATGAGAGTAATCGACGTAAAATTGAACTCTTTAAAATT  
ATTAGGCCTGAACTATTGTTCTTTAGCCTGAACATTTTTTTTAAATATAAAGGAATGCTCTAGT  
TATTAAGACTGTCTTGGGGGCTCCCAAATAAATCATTTTTTAACTTGATCTGAAATCAGGT  
GGGATTACCCGCTGAACTTAAGCATATCAATAAGCGGAGGAA

>BSNB\_0177\_Rhizomucor\_variabilis

TTTGAGTATGCTTCTCAGCATATTTCTAATTTACTGTGAACTGTTTTACTGTTTAGCGTTTTGAG  
GGATTGCCTAAAGATTATAGGGATAGGTCTTTAGGATGTTAACCTAGCTAAAGTCAGGCTTA  
GGCCTGGTATCCTAATTCATTATTTACCAAAAGAATTCAGAATTAATTATTGTAACATAAGC  
GTAAAAAACTTATAAAACAACCTTTTAACAACGGATCTCTTGGTTCTCGCATCGATGAAGAAC  
GTAGCAAAGTGCGATAACTAGTGTGAATTGCATATTCAGTGAATCATCGAGTCTTTGAACGC  
ATCTTGCGCTCAATGGTATTCCATTGAGCACGCCTGTTTCAGTATCAACAACAACCCACATC  
CACAATTTTGTGTGAATGGAAATGAGAGTAATCGACGTAAAATTGAACTCTTTAAAATTA  
TTAGGCCTGAACTATTGTTCTTTAGCCTGAACATTTTTTTTAAATATAAAGGAATGCTCTAGTT  
ATTAAGACTGTCTTGGGGGCTCCCAAATAAATCATTTTTTAACTTGATCTGAAATCAGGTG  
GGATTACCCGCTGAACTTAAGCATATCAATTAAGCGGAGGAA

>BSNB\_0196\_Cladosporium\_sp

TGACCCGGCTACGGCGGGAGTTCATAACCCTTTGTTGTCCGACTCTGTTGCCTCCGGGGCGA  
CCCTGCCTTCGGGCGGGGGCTCCGGGTGGACACTTCAAACCTTTGCGTAACTTTGCAGTCTG  
AGTAACTTAATTAATAAATTAACCTTTTAACAACGGATCTCTTGGTTCTGGCATCGATGA  
AGAACGCAGCGAAATGCGATAAGTAATGTGAATTGCAGAATTCAGTGAATCATCGAATCTT  
TGAAACGCACATTGCGCCCCCTGGTATTCCGGGGGGCATGCCTGTTGAGCGTCATTTACCA  
CTCAAGCCTCGCTTGGTATTGGGCAACGCGGTCCGCCGCGTGCCTCAAATCGTCCGGCTGGG  
TCTTCTGTCCCCTAAGCGTTGTGGAACTATTCGCTAAAGGGTGTTCGGGAGGCTACGCCGT  
AAAACAACCCCATTTCTAAGGTTGACCTCGGATCAGGTAGGGATACCCGCTGAACTTAAGC  
ATATCAATTAAGCGGAGGAA

>BSNB\_0197\_Penicillium\_sanguifluum

GGAGCTCTGGGTCAACCTCCCACCCGTGTTTAACGAACCTTGTTGCTTCGGCGGGCCCCGCCT  
CACGGCCCGCGGGGGGCATCCGCCCCGGGCGCGCCCGCCGAAGACACCTGTGAACACT  
GTCTGAAGTTGCAGTCTGAGAACTAGCTAAATTAGTTAAACCTTTCAACAACGGATCTCTT  
GGTTCCGGCATCGATGAAGAACGCAGCGAAATGCGATAAATAATGTGAATTGCAGAATTCA  
GTGAATCATCGAGTCTTTGAACGCACATTGCGCCCTCTGGTATTCCGGAGGGCATGCCTGTC  
CGAGCGTCATTGCTGCCCTCAAGCACGGCTTGTGTGTTGGGCCCCCGTCCCCCGCCAGGGG  
GGACGGGCCCCGAAAGGCAGCGGCGGCACCGCGTCCGGTCCTCGAGCGTATGGGGCTCTGTC  
ACCCGCTCTTGTAGGCCCGGCCGGCGCCAGCCGACCCCCCTCAATCTATTTTTTCAGGTTGAC  
CTCGGATCAGGTAGGGATACCCGCTGAACTTAAGCATATCAATAAGCGGAGGAA

>BSNB\_0201\_Exophiala\_xenobiotica

GAGATNAGTATAGTACCTTGTAAATCCGCTTGGTGTATACCGGGTGCCGCCAAACCCTAGATC  
CGATACGTGCTCAGTTAAGAAGCTCAGTGTACCGGGGGTTCAACAGCCGCCGTCATTGTCTT  
TAGGAGGGGTCTAGGGGTACCTAAACCAAAACCGTCCAACACCAAGCCGGGGGCTTGAGGG  
GTGAAAATGACGCTCGAACAGGCATGCCCTTCGGAATACCAAAGGGCGCAATGTGCGTTCA  
AAGATTCGATGACTCACTGGAATTCTGCAATTCGCATTACTTATCGCATTTTCGCTGCGTTCTT  
CATCGATGCCAGAACCAAGAGATCCGTTGTTGAAAGTTTTGCTTTAATTTTTTTGTTTACTCA  
GACAATACATGTTTTGTTCAAGAGTTTTTGGTTTTGGGCTATCGGTAGGCACTCTCCAGAGGAC  
GTTTTACGGTCTCCGGTAGGACGAGCCAGACCTACCGAAGCAACACAAGGTATAATAAGC  
AAAGGGTTGGGAGATCGGGCCTTTGAGGACCCTAACTCGGTAATGATCCTTCCGCAGGTTCA  
CCTACGGAAGGA

>BSNB\_0212\_Pseudallescheria\_boydii

GTACCTACCTGATCCGAGGTCAACCATCTGGAGTTATAGGTGGTTTGACGGCAGGCCTCCGC  
CGGGACCCAATGCGAGCTTGCAAAAGAGACTTACTACGCAGAAGGCAACCGCGGCGGGAC  
CGCCACTGTATTTCAAGGCCTACGGAGGGTTCGCGAAGACTCGCCGTAGCGCCCCAACACCG  
ACCCTGAGCTTCCCTGAGGAAACGGAGGTTTCGAGGGTTGAAATGACGCTCGGACAGGCATG  
CCCGGCAGATTACTGCCGGGCGCAATGTGCGTTCAAAGATTCGATGATTCACTGAATTCTGC  
AATTCACATTACTTATCGCATTTTCGCTGCGTTCTTCATCGATGCCAGAACCAAGAGATCCGTT  
GTTGAAAGTTTTAACTTGTTTTTTGTTCAAATCAGAACTGTAATCCGCTGTAAAATTCAA  
GAGTTTGGTGCTGCCGGCGGGAGGGCATCGTCTCTTTTCAGAGGGGGCGCTGACCACGCCG  
CCGAGGCAACAGAACATAGTAAGGTTACAATGGGTTTGGAGTAGTAACCTCTGTAATGAT  
CCCTCCGCAGGTTACCTACGGAA

>BSNB\_0216\_Scedosporium\_boydii

ACAAGGTCTCCGTTGGTGAACCAGCGGAGGGATCATTACAGAGTTACTACTCCAAACCCATT  
GTGAACCTTACCTATGTTCTGTTGCCTCGGCGGCGTGGTCAGCGCCCCCTCTGAAAAGAGGA  
CGATGCCCTCCCGCCGGCAGCACCAAACTCTTTGAATTTTACAGCGGATTACAGTTCTGATTT  
GAAAACAAAAACAAGTTAAAACTTTCAACAACGGATCTCTTGTTCTGGCATCGATGAAG  
AACGCAGCGAAATGCGATAAGTAATGTGAATTGCAGAATTCAGTGAATCATCGAATCTTTG  
AACGCACATTGCGCCCGGCAGTAATCTGCCGGGCATGCCTGTCCGAGCGTCATTTCAACCCT  
CGAACCTCCGTTTCTCAGGGAAGCTCAGGGTTCGGTGTTGGGGCGCTACGGCGAGTCTTCGC  
GACCCTCCGTAGGCCCTGAAATACAGTGGCGGTCCCGCCGCGGTTGCCTTCTGCGTAGTAAG  
TCTCTTTTGCAAGCTCGCATTGGGTCCCGGCGGAGGCCTGCCGTCAAACCACCTATAACTTCC  
AGATGGTTTGACCTCGGA

>BSNB\_0218\_Penicillium\_citrinum

GGATTGCTGCATGATTCGAGGTCAACCTGAGATAATTAAAGGTTGGGGGTCCGCTGGCGCCG  
GCCGGGCTACTAGAGCGGGTGACGAAGCCCCATACGCTCGAGGACCGGACGCGGTGCCG  
CCGCTGCCTTTCCGGGCCCGTCCCCCGGCGGGGGGACGGGGCCCAACACACAAGCCGGGC  
TTGAGGGCAGCAATGACGCTCGGACAGGCATGCCCTCCGGAATACCAGAGGGCGCAATGTG  
CGTTCAAAGACTCGATGATTCACTGAATTCTGCAATTCACATTAGTTATCGCATTTTCGCTGCG  
TTCTTCATCGATGCCGGAACCAAGAGATCCGTTGTTGAAAGTTTTAACTAATTCGTTATAGG  
TCTCAGACTGCAACTTCAGACAGCGTTACAGGGGGGCGGTCGGCGGGCGGGGGCCCGCCGA  
GGCAACATAGGTTCCGGCAACACGGGTGGGAGGTTGGGCCCCC

>BSNB\_0220\_Paecilomyces\_formosus

GTTTCCGTAGGTGAACCTGCGGAAGGATCATTACCGAGTGAGGGTCCCACGAGGCCCAACC  
TCCCATCCGTGTTGAACTACACCTGTTGCTTCGGCGGGCCCGCCGTGGTTACGCCCCGGCCG  
CCGGGGGGCCTTGCTGCTCCCGGGCCCGCGCCCGCCGAAGACCCCTCGAACGCTGCCCTGAA  
GGTTGCCGTCTGAGTATAAAATCAATCATTAAAACTTTCAACAACGGATCTCTTGGTTCCGG  
CATCGATGAAGAACGCAGCGAAATGCGATAAGTAATGTGAATTGCAGAATTCGTTGAATCA

TCGAATCTTTGAACGCACATTGCGCCCCCTGGCATTCCGGGGGGCATGCCTGTCCGAGCGTC  
ATTGCTAACCCCTCCAGCCCGGCTGGTGTGTTGGGTGACGTCCCCCCCCCGGGGACGGGCC  
CGAAAGGCAGCGGCGGCGCCGCGTCCGATCCTCGAGCGTATGGGGCTTTGTCACGCGCTCT  
GGTAGGGTCGGCCGGCTGGCCAGCCAGCGACCTCACGGTCACCTATTTTTCTCTTAGGTTG  
ACCTCGGATC

>BSNB\_0222\_Scedosporium\_boydii

NNNNNNNNAGTACTACTCCAAACCCATTGTGACCTTACCTGTGTTCTGTTGCCTCGGCGGC  
GTGGTCAGCGCCCCTCTGAAAAGAGGACGATGCCCTCCCGCCGGCAGCACCAAACCTTTTG  
AATTTTACAGCGGATTACAGTTCTGATTTGAAAACAAAAACAAGTTAAACTTTCAACAAC  
GGATCTCTTGGTTCTGGCATCGATGAAGAACGCAGCGAAATGCGATAAGTAATGTGAATTGC  
AGAATTCAGTGAATCATCGAATCTTTGAACGCACATTGCGCCCCGGCAGTAATCTGCCGGGCA  
TGCCTGTCCGAGCGTCATTTCAACCCTCGAACCTCCGTTTCCTCAGGGAAGCTCAGGGTCGG  
TGTTGGGGCGCTACGGCGAGTCTTCGCGACCCTCCGTAGGCCCTGAAATACAGTGGCGGTCC  
CGCCGCGGTTGCCTTCTGCGTAGTAAGTCTCTTTTGCAAGCTCGCATTGGGTCCCGGCGGAGG  
CCTGCCGTCAAACCACCTATAACTCCAGATGGTTTGACCTCGGATCAGGTAGGGTTACCCGC  
TGAACCTAAGCATATCAATAAGCGGAGGAAA

>BSNB\_0224\_Paecilomyces\_formosus

NNNNNNNNNTCCTACCTGATCCGAGGTCACCTAAGAGAAAAAATAGGTGACCGTGAGGTCCG  
CTGGCTGGCCAGCCGGCCGACCCTACCAGAGCGCGTGACAAAGCCCCATACGCTCGAGGAT  
CGGACGCGGCGCCGCGCTGCCTTTCCGGCCCCGTCCCCCGGGGGGGGACGTCCGACCCAAC  
ACACCAGCCGGGCTGGAGGGTTAGCAATGACGCTCGGACAGGCATGCCCCCGGAATGCCA  
GGGGGCGCAATGTGCGTTCAAAGATTCGATGATTCACGGAATTCTGCAATTCACATTACTTA  
TCGCATTTTCGCTGCGTTCTTCATCGATGCCGGAACCAAGAGATCCGTTGTTGAAAGTTTAAAT  
GATTGATTTTATACTCAGACGGCAACCTTCAGGGCAGCGTTCGAGGGGTCTTCGGCGGGCGC  
GGGCCCCGGGAGCACAAGGCCCCCGGCGGCGGGCGTGAACCACGGCGGGCCCCGCCGAAG  
CAACAGGTGTAGTTCAACACGGATGGGAGGTTGGGCCTCGTGGGACCCTCACTCGGTAATG  
ATCCTTCCGCAGGTTACCTACGGAAGGAT

>BSNB\_0225\_Pestalotiopsis\_microspora

AGTTTTATCTCTGCTGCCTGATCCGAGGTCAACCATTAAAAATTGGGGGGTTTAGCGGCTAA  
AGACGCTGCAACTCCAGTCAAAAGCGAGATAAAAATTACTACGCTCAGAGGATATCGCAGA  
TCCGCCGTTGTATTTAGGAGCTACAGCTAGCAAAAGCAGTAGGCTCCCAACACTAAGCTA  
GGCTTAAGGGTTGAAATGACGCTCGAACAGGCATGCCCACTAGAATACTAATGGGCGCAAT  
GTGCGTTCAAAGATTCGATGATTCACCTGAATTCTGCAATTCACATTACTTATCGCATTTGCT  
GCGTTCTTCATCGATGCCAGAACCAAGAGATCCGTTGTTGAAAGTTTTGACTTATTAATA  
AGACGCTCAGATAACCATAAAATAACAAGAGTTTGGTAGTCCACCGGCAGCCGTTGCAGGG  
TAAGCCGTTCCAGGGTAAGGCGCTACAGGGTAGGCCGTTCCAAGGTAAGGTGCACCGAGCA  
GCTTCTGCCGAGGCAACAATGGTAAGTTCACATGGGTTGGGAGTTTAGAAAACCTCTATAATG  
ATCCCTCCGCAGGTTACCTACGGA

>BSNB\_0226\_Pseudallescheria\_boydii

NNNNNNNTACCTACCTGATCCGAGGTCAAACCATCTGGAGTTATAGGTGGTTTGACGGCAG  
GCCTCCGCCGGGACCCAATGCGAGCTTGCAAAAGAGACTTACTACGCAGAAGGCAACCGC  
GGCGGGACCGCCACTGTATTTAGGGCCTACGGAGGGTCGCGAAGACTCGCCGTAGCGCCC  
CAACACCGACCCTGAGCTTCCCTGAGGAAACGGAGGTTTCGAGGGTTGAAATGACGCTCGGA  
CAGGCATGCCCGGCAGATTACTGCCGGGCGCAATGTGCGTTCAAAGATTCGATGATTCACTG  
AATTCTGCAATTCACATTACTTATCGCATTTGCTGCGTTCTTCATCGATGCCAGAACCAAGA  
GATCCGTTGTTGAAAGTTTTAACTTGTTTTTTGTTTTCAAATCAGAACTGTAATCCGCTGTAAA

ATTCAAAGAGTTTGGTGCTGCCGGCGGGAGGGCATCGTCCTCTTTTCAGAGGGGGCGCTGAC  
CACGCCGCCGAGGCAACAGAACATAGGTAAGGTTTACAATGGGTTTGGAGTAGTAACTCTG  
TAATGATCCCTCCGCAGGTTACCCCTACGGAA

>BSNB\_0227\_*Aspergillus\_aculeatus*

TTAGACTAGCTAGCTCCGCTTGTTGATCTGCAACCAACGGAGTGATCGGTGGATTGACGGCA  
GGCCTCCGCCGGGACCCAATGCGAGCTTGCAAAAGAGACTTACTACGCAGAAGGCAACCG  
CGGCGGGACCGCCACTGTATTTACGGGCCTACGGAGGGTCGCGAAGACTCGCCGTAGCGCC  
CCAACACCGACCCCTGAGCTTCCCTGAGGAAACGGAGGTTGAGGGTTGAAATGACGCTCGG  
ACAGGCATGCCCGGCAGATTACTGCCGGGCGCAATGTGCGTTCAAAGATTTCGATGATTCACT  
GAATTCTGCAATTCACATTACTTATCGCATTTCGCTGCGTTCTTCATCGATGCCAGAACCAAG  
AGATCCGTTGTTGAAAGTTTTAACTTGTGTTTTGTTTTCAAATCAGAACTGTAATCCGCTGTAA  
AATTCAAAGAGTTTGGTGCTGCCGGCGGGAGGGCATCGTCCTCTTTTCAGAGGGGGCGCTGA  
CCACGCCGCCGAGGCAACAGAACATAGGTAAGGTTTACAATGGGTTTGGAGTAGTAACTCT  
GTAATGATCCCTCCGCAGGTTACCTACGGA

>BSNB\_0228\_*Penicillium\_rubidurum*

TAACAAGGTTTCCGTAGGTGAACCTGCGGAAGGATCATTACCGAGTGAGGACCCTCTGGGT  
CCAACCTCCCACCCGTGTTTATCGTACCTTGTTGCTTCGGCGGGCCCGCCGCAAGGCCGCCG  
GGGGGCTTCCGTCCCCGGGCCCCGTGCCCGCCGAAGACACCTGTGAACGCTGTATGAAGATT  
GCAGTCTGAGCGACAAGCTAAATTTGTTAAACTTTCAACAACGGATCTCTTGGTTCCGGCA  
TCGATGAAGAACGCAGCGAAATGCGATAAGTAATGTGAATTGCAGAATTCAGTGAATCATC  
GAGTCTTTGAACGCACATTGCGCCCCCTGGTATTCCGGGGGGCATGCCTGTCCGAGCGTCAT  
TGCTGCCCTCAAGCACGGCTTGTGTGTTGGGCCCTCGTCCCCCGGGACGGGCCCGAAAGGCA  
GCGGCGGCACCGCTCCGGTCCTCGAGCGTATGGGGCTTCGTCACCCGCTCTGCAGGCCCGG  
CCGGCGCTGCCGACACCATCAATCTTTTTTCCAGGTTGACCTCGGATCAGGTAGGATCCC  
AT

>BSNB\_0243\_*Penicillium\_araracuarensis*

AGGAGAAGTTTCGTAACAAGGTTTCCGTAGGTGAACCTGCGGAAGGATCATTACCGAGTGAG  
GGCCCTCTGGGTCCAACCTCCCACCCGTGTTTATCGTACCTTGTTGCTTCGGCGGGCCCGCCT  
CACGGCCGCCGGGGGGCATCTGCCCCCGGGCCCGCGCCCGCCGAAGACACCAATGAACTCT  
TGTCTGAAGATTGCAGTCTGAGCAGATTAGCCTAAATCAGTTAAACTTTCAACAACGGATC  
TCTTGGTTCCGGCATCGATGAAGAACGCAGCGAAATGCGATACGTAATGTGAATTGCAGAA  
TTCAGTGAATCATCGAGTCTTTGAACGCACATTGCGCCCCCTGGTATTCCGGGGGGCATGCC  
TGTCGAGCGTCATTGCTGCCCTCAAGCACGGCTTGTGTGTTGGGCTTCGCCCCCGGCTCCC  
GGGGGGCGGGCCCGAAAGGCAGCGGCGGCACCGCGTCCGGTCCTCGAGCGTATGGGGCTTC  
GTCACCCGCTCTGTAGGCCCGGCCGGCGCCCGCGGCGACCCCAATCAATCTTCCAGGTTG  
ACCTCGGATCAGGGTAAGGG

>BSNB\_0244\_*Penicillium\_araracuarensis*

AGCATCTGGGTCAACCTCCCACCCGTGTTTATCGTACCTTGTTGCTTCGGCGGGCCCGCCTCA  
CGGCCGCCGGGGGGCATCTGCCCCCGGGCCCGCGCCCGCCGAAGACACCAATGAACTCTTG  
TCTGAAGATTGCAGTCTGAGCAGATTAGCTAAATCAGTTAAACTTTCAACAACGGATCTCT  
TGGTTCCGGCATCGATGAAGAACGCAGCGAAATGCGATACGTAATGTGAATTGCAGAATTC  
AGTGAATCATCGAGTCTTTGAACGCACATTGCGCCCCCTGGTATTCCGGGGGGCATGCCTGT  
CCGAGCGTCATTGCTGCCCTCAAGCACGGCTTGTGTGTTGGGCTTCGCCCCCGGCTCCCGG  
GGGGCGGGCCCGAAAGGCAGCGGCGGCACCGCGTCCGGTCCTCGAGCGTATGGGGCTTCGT

CACCCGCTCTGTAGGCCCGGCCGGCGCCCGCCGGCGACCCCAATCAATCTTTCCAGGTTGAC  
CTCGGATCAGGTAGGGATACCCGCTGAACTTAAGCATATCAATAACCCAGAGGAAA

>BSNB\_0250\_*Aspergillus\_sp*

GGGTCTCGTACGAGTCTCTGGGTACCTCCCACCCGTGTCTATTGTACCTTGTGCTTCGGCG  
GGCCCGCCGTACGGCCGCCGGGGGGCATCTGCCCCCGGGCCCGCGCCCGCCGAAGACCCAA  
CATGAACACTGTTCTGAAAGCTTGCAGTCTGAGTTGAATATCATAATCAGTTAAACCTTTCA  
ACAACGGATCTCTTGGTTCCGGCATCGATGAAGAACGCAGCGAAATGCGATAACTAATGTG  
AATTGCAGAATTCAGTGAATCATCGAGTCTTTGAACGCACATTGCGCCCCCTGGTATTCCGG  
GGGGCATGCCTGTCCGAGCGTCATTGCTGCCCTCAAGCACGGCTTGTGTGTTGGGCCGCCGT  
CCCCGCCTCCCCGGGGACGGGCCCGAAAGGCAGCGGCGGCACCGTGTCCGGTCTTCGAGCG  
TATGGGGCTTTGTACCCGCTCTGTAGGCCTGGCCGGCGCCAGCCGACGTACCAACCCTTTTT  
CTTTAGGTTGACCTCGGATCAGGTAGGGATACCCGCTGAACTTAAGCATATCAATAAGGCGG  
AGGAAAAGGGGAGGGGACAGAGAGGGGGAA

>BSNB\_0253\_*Penicillium\_sp*

ATGAGGCCTCCGGGTCCAACCTCCCACCCGTGTTTATTCGTACCTTGTGTTTCGGCAGGCCCG  
CCTCACGGCCCGCGGGGGGCTTCTGCCCCCGGGCCCGCGCCTGCCGGAGACAATTCTGAAC  
GCTGTCTGAAGAATGCAGTCTGAGCGATTAGCAAAATTAGTTAAACCTTTCAACAACGGATC  
TCTTGGTTCCGGCATCGATGAAGAACGCAGCGAAATGCGATAATTAATGTGAATTGCAGAA  
TTCAGTGAATCATCGAGTCTTTGAACGCACATTGCGCCCCCTGGTATTCCGGGGGGCATGCC  
TGTCGAGCGTCATTGCTGCCCTCAAGCCCGGCTTGTGTGTTGGGCCCTGTTCCCCCGGGAAC  
AGGCCCGAAAGGCAGTGGCGGCACCGCGTCCGATCCTCGAGCGTATGGGGCTTTGTACCC  
GCTCTGTAGGCCCGGCCGGCGCCCGTTCGACCCCCCAACCTTTTTTTTTTTTTTKTCCANGNNAC  
CCTCGAACAGGGGGGGGACCCCCCTTAAATTTAGGCATTTCTTAAGGGGGAAGAA

>BSNB\_0263\_*Paecilomyces\_formosus*

GGAGGCCACCTCCCATCCGTGTTTGAACTACACCTGTTGCTTCGGCGGGCCCGCCGTGGTT  
CACGCCCCGGCCCGCGGGGGGCCTTGTGCCCCCGGGCCCGCGCCCGCCGAAGACCCCTCTA  
ACGCTGCCCTGAAGGTTACCGTCTGAGTATAAAATCAATCGTTAAACCTTTCAACAACGGAT  
CTCTTGGTTCCGGCATCGATGAAGAACGCATCGAAATGCGATAAGTAATGTGAATTGCAGA  
ATTCCGTGAATCATCGAATCTTTGAACGCACATTGCGCCCCCTGGCATTCCGGGGGGCATGC  
CTGTCCGAGCGTCATTGCTAACCCTCCAGCCCGGCTGGTGTGTTGGGTCGACGTCCCCCCCG  
GGGGACGGGCCCGAAAGGCAGGGGGCGCGCCGCGTCCAATCCTCKAGCGTATGGGGCTTTG  
TCACGCCCTCTGGTATGGTCGGCCGACTGGTCATTCAACTATCTCGCAGTCACCTATT

>BSNB\_0266\_*Rhizomucor\_variabilis*

NNNNNNNNNNNNNNNNNNNNNNNNNNNNNNNNNNNNNNNNNNNNCTGTTTTACTGTTTAGCGTTTTGAGGGATTG  
CCTAAAGATTATAGGGATAGGTCTTTAGGATGTTAACCTAGCTAAAGTCAGGCTTAGGCCTG  
GTATCCTAATTCATTATTTACCAAAAGAATTCAGAATTAATTATTGTAACATAAGCGTAAAA  
AACTTATAAAACAACCTTTTAAACAACGGATCTCTTGGTTCTCGCATCGATGAAGAACGTAGCA  
AAGTGCGATAACTAGTGTGAATTGCATATTCAGTGAATCATCGAGTCTTTGAACGCATCTTG  
CGCTCAATGGTATTCCATTGAGCACGCCTGTTTCAGTATCAACAACAACCCACATCCACAAT  
TTTGTGTGAATGGAAATGAGAGTAATCGACGTTAAATTTGAACCTTTTAAATTTATTAGGC  
CTGAACTATTGTTCTTTTAGCCTGAACATTTTTTTTAAATATAAAGGAATGCTCTAGTTATTAAG  
ACTGTCTTGGGGCCCTCCCAAATAAATCATTTTTTAAACTTGATCTGAAATCAGGTGGGATTA  
CCCCTGAACTTAAGCATATCAATAAGCGGAAGGAA

>BSNB\_0283\_Acrodictys\_sp

GATCCGAGGTCAAACCACTATGCGTTTGGGGTGTTTAACGGCCAGCGCGCGCCGGGCGCCC  
CTGAGCGAGAGGAGAACTACTGCGCTCGGAGGCTCGGCGAGCCCCGCCACTGCATTTTCGGGG  
CCTACAGACGCTGTAGAGATGCCCCAACACCAAGCCGCGGGGGGCTTGAGGGTTCGAAATG  
ACGCTCGAACAGGCATGCCCCGCCAGAATGCTGGCGGGCGCAATGTGCGTTCAAAGATTCTGA  
TGATTCACGGAATTCTGCAATTCACACTACGTATCGCATTTTCGCTGCGTTCTTCATCGATGCT  
GGAACCAAGAGATCCGTTGTTGAAAGTTTTGACTGATTTGTATGCTATACTCAGAAGACCAC  
TGTACAGACGAGCTTCGGTTCTCCTCCGGCGGGCACCTCGCGGCCGCGGCCCCGCCCTGGGG  
CCGCCCGCCGAAGCAACGGGACGGGTAGGTTACAAAGGGTTTGGGAGTCTTGCAACTCGG  
TAATGATCCCTCCGCTGGTTCACCAACGGAGACCTTGTTACGACTTCTCCT

>BSNB\_0284\_Ochroconis\_sp

CCGTAGGTGAACCTGCGGAAGGATCATTACTGAGTGGCGTGCGGAGAATTGCGCTCGGAGA  
CGAGACGTTCTCGGCCAGGTTACCCGACCTTTTGTCAATTGCTGGTTGGTGGAGTGGGGGTTG  
GCTTCCGTTTCGGGACAGGTCTGAACGTCTTAGGGCGGGGAGGACCAGGTTCGTCGGAGCGG  
GATCCGCCCAACACGATGCCGACACTGTATTTTCGGCGGAAGAGGTGGTTCGTCGAGCTGCCC  
GCCGCCGGTGGTATTTTCCAACCTCTTTTTTTTAATATTGTGAGAAGCTGAGAAGCGTCTGAG  
GAAAAAACGATAAAATGAAAAAGCAAACTTTCAACAACGGATCTCTTGGCTCTGGCAACG  
ATGAAGAACGCAGCGAAACGCGAAAGGTAATGCGAATTGCAGAATCAGTGAGTCATCGAA  
TCTTTGAACGCACATTGCGCCTCTTGGTATTCCAGGAGGCACGCCTGTTTCGAGCGCCATCAC  
AAACTCCAAGCGTGGCTTGATGTTGGACGGTGTCTGGGAGGAGACTCCTGACACGTCTGGAA  
CGCGTGGGCGCCGCCGCGCCAGACCACGAGCGTAGCAAGACGAAACAGTCGATCGTTCGGATT  
GGGAGCTGGCGGTGGCCGTCTGGGGGGTGGCCTCTTGTTTTCTCTCCTGTGGGAGGGGGGAC  
GGGAGGACCGCCGAACGTCAAAGTTTGGCCTCGGATCAGGC

>BSNB\_0285\_Ochroconis\_sp

AGTTCAGAAATTTTGTCCGAAGACGTTAGAAGCGCGAACACTAGAATACCCTCCACAGCAA  
CGCAGATAATTATCACGCTGAAGCGGCTGGTAACGTTTCGACTAATGCATTTTCAGAGGAGCC  
GACTACGAGAGCCGGCACGACCTCCAAGTCCAAGCCTTCGTCAATAAAGCCGAAGGTTGAG  
AATTCCATGAGACTCAAACAGGCATGCTCCTCGGAATACCAAGGAGCGCAAGGTGCGTTCA  
AAGATTCGATGATTCACTGAATTCTGCAATTCACATTACTTATCGCATTTTCGCTGCGTTCTTCA  
TCGATGCGAGAGCCAAGAGATCCGTTGCTGAAAGTTGTATATAAATTGCGTTATAGCAAAGT  
ATGACATTCTAAACTGAATCGTTTGTAGTAAAGCATAAGCCCCGACACCTACAAGTGCGCG  
AACGCACCCACAAGCCGGCCTATGAAAAGTGACAGAAAGTTGAGAGTGGATGAGACAGGC  
GTGCACATGCCCTTGCGAGCCAGCAGACAACCCGTTCAAAACTCGATAATGATCCTTCCGCA  
GGTTCACCTACGGAAACCTTGTTACGAACTTCTCCT

>BSNB\_0287\_Sordariomycetes\_sp

TGATCCGAGGTCAACCTTGAGATAGAGGGGTTTTACGGGCGGAACGCCCCGGGACGCCGCG  
AGCGAGGTGTATTACTGCGCTACGGGTCCAGGCGCGCCCGCCACTTCTTTTCAGGGCCCCGCG  
GCGGACGCGGGGCCCCAACACCGAGCAAGGCTCGAGGGTTGAAATGACGCTCGAACAGGC  
ATGCCCGCCGGAATGCCGGCGGGCGCAATGTGCGTTCAAAGATTCGATGATTCGCTGAGTTC  
TGCAATTCACATTACTTATCGCATTTTCGCTGCGTTCTTCATCGATGCCAGAACCAAGAGATCC  
GTTGTTGAAAGTTTTGACTCATTTAGTGTCTTCTCAGAGGGGCCTAAATCGCAAGAGTTGTGC  
TGCGCTGCCGCGCGGGCGCCCTTGCGGGCTGCGGCCCTCCCCGGGGCCGACCGCCAAA  
ACAACGAAC

>BSNB\_0289\_Paramicrothyrium\_sp

GATCCGAGGTCAACCTTAGGAGTTGATGGGGGTTTAACGGCCGGCATCCGCCGCGCGCGCC  
AGGGCGAGGTATGTTACTGCGCCCGGTGCGACGGCGGGTCCGCCACTGCTTTTCGGGGCCCA  
CGGCGGGCGTGGGGGCCCCAACACCAAGCGGTGCTTGGGGGTGCAAATGACGCTCGGACAG  
GCATGCCCGCCGGAGTGCCGGCGGGCGCAATGTGCGTTCAAAGATTTCGATGATTCACTGAA  
TTCTGCAATTCACATTACTTATCGCATTTTCGCTGCGTTCTTCATCGATGCCAGAACCAAGAGA  
TCCGTTGTTGAAAGTTTTGACGTTTGATAAACGCTCAGATGTGCCACTGTAAAGACAATAGTT  
TTGGGGCCCGCGGGCGGGCGCCCCGGGGGGCGCGCCGCCGAGGCAACGGGGTTCGTTTCGCGA  
CGGTTTTGGAGAGCAGAAAACCTCTGTAATGATCCCTCCGCTGGTTCACCAACGGAGACCT

>BSNB\_0290\_Colletotrichium\_gloeosporioides

CTGATCCGAGGTCAACCTTTGGAAAATTGGGGGGTTTTACGGCAAGAGTCCCTCCGGATCCC  
AGTGCGAGACGTAAAGTTACTACGCAAAGGAGGCTCCGGGAGGGTCCGCCACTACCTTTGA  
GGGCCTACATCAGCTGTAGGGCCCCAACACCAAGCAGAGCTTGAGGGTTGAAATGACGCTC  
GAACAGGCATGCCCGCCAGAATGCTGGCGGGCGCAATGTGCGTTCAAAGATTTCGATGATTC  
ACTGAATTCTGCAATTCACATTACTTATCGCATTTTCGCTGCGTTCTTCATCGATGCCAGAACC  
AAGAGATCCGTTGTTAAAAGTTTTGATTATTTGCTTGTACCACTCAGAAGAAACGTCGTAA  
ATCAGAGTTTGGTTATCCTCCGGCGGGCGCCGACCCGCCCGGGGGGGCGGGAGGCCGGGAG  
GGTCACGGGGACCCTACCCGCCGAAGCAACAGTTGTAGGTATGTTACAAAGGGTTGTAGA  
GCGTAAACTCAGTAATGATCCCTCCGCTGGTTCACCAACGGAGACCTTGTTA

>BSNB\_0292\_Apioclypea\_sp

CCTGATCCGAGGTCAACCCAGTAAAAAAGTTGGGGGTTTAGCGGCGAGGGCCACGGCACCT  
ACAGAAGCGAGAGGTATATTACTGCGCTCAGAGGTAGAACCGTCACTCCGCCCGGTGAATTT  
GAGGAGCTACAGGGTAACAGCTACAGGGTAGCTCCCGGGTAGTCTCCCAACGCCAAGACTA  
GGTCTTGAGTGGTACTAATGACGCTCGAACAGGCATGCCCTCCAGAATGCTGGGGGGCGCA  
ATGTGCGTTCAAAGATTTCGATGATTCACTGAATTCTGCAATTCACATTACTTATCGCATTTTCG  
CTGCGTTCTTCATCGATGCCAGAACCAAGAGATCCGTTGTTAAAGGTTTTGACTTATTTTCAT  
AAGACTCTCAGATGATAATAATAACAAATAGTTTGGTTTTCCACCGGCGGTCCGCCCGCTACA  
GGGTAAGCTGCAGGGTAAGACCGCCGAGGCAACGTAAGGTATAGGTTACAAATGGTTTAT  
ACAGGAGTGTTTTAATACTCTGTAATGATCCCTCCGCTGGTTCACCAACGGAGACCTTGTTAC  
GAACCTCTCCT

>BSNB\_0293\_Penicillium\_sp

AAGCCCCATACGCTTGAGGACCGGACGCGGTGCCGCCGCTGCCTTTCGGGCCCCGTCCCCCGG  
AAGGAGGACGGAGCCCAACACACAAGCCGTGCTTGAGGGCAGCAATGACGCTCGGACAGG  
CATGCCCTCCGGAATACCAGAGGGCGCAATGTGCGTTCAAAGACTCGATGATTCACTGAATT  
CTGCAATTCACATTACGTATCGCATTTTCGCTGCGTTCTTCATCGATGCCGGAACCAAGAGATC  
CGTTGTTGAAAGTTTTAAATAATTTATATTTAATCTCAGACTACAATCTTCAGACAGAGTTCT  
AAGGTGTCTTCGGCGAGCGCGGACCCGGGGACAGACGTCCCCCGGCAGCCAAAAGGCAGG  
CTCGCCGAAGCAACAAGGTAAATAAACACGGGTGGGAGGTTGGACCCAGAGGGCCCTCA  
CTCGGTAATGATCCTTCGCGAGGTTACCTACGGAAACCTTGTTACGACTTCTCCT

>BSNB\_0295\_Chaetomium\_sp

CCTGATCCGAGGTCAACCTTGTAAGTTAGGGGGTTTTACGGCCGGTACGCACCGGGACGCCG  
CGAGCGAGGTTAAGCTACTGCGCTACGGGTCCAGGCGCGCCCGCCACTTCTTTTCAGGGCCC  
GCGGCAGCCGCGGGGCCCCAACACCGAGCAGGGCTCGAGGGTTGAAATGACGCTCGAACA  
GGCATGCCCGCCGGAATGCCGGCGGGCGCAATGTGCGTTCAAAGATTTCGATGATTTCGCTGA  
GTTCTGCAATTCACATTACTTATCGCATTTTCGCTGCGTTCTTCATCGATGCCAGAACCAAGAG



ATCCGTTGTTGAAAGTTTTGACTCATTTAGTGTCTTCTCAGAGGGGCCTAAATTGCAAGAGTG  
TAAAGTGCCGCCGGCGGGCGCCCTTGCGGGCTGCGGCCCTCCCCGGGGCCGCCACCGAA  
GCAACGTCTTCAGTACAAGTTCACGGGTGTGTATAGAGAGAATGGAACCTCTATAATGATCCC  
TCCGCTGGTTCACCAACGGAGACCTTGTTACA

>BSNB\_0296\_Chaetomium\_sp

AGTTCAGAAATTTTGTCCGAAGACGTTAGAAGCGCGAACACTAGAATACCCTCCACAGCAA  
CGCAGATAATTATCACGCTGAAGCGGCTGGTAACGTTTCGCACTAATGCATTTTCAGAGGAGCC  
GACTACGAGAGCCGGCACGACCTCCAAGTCCAAGCCTTCGTCAATAAAGCCGAAGGTTGAG  
AATTCATGAGACTCAAACAGGCATGCTCCTCGGAATACCAAGGAGCGCAAGGTGCGTTCA  
AAGATTCGATGATTCACTGAATTCTGCAATTCACATTACTTATCGCATTTTCGCTGCGTTCTTCA  
TCGATGCGAGAGCCAAGAGATCCGTTGCTGAAAGTTGTATATAAATTGCGTTATAGCAAAGT  
ATGACATTCTAAACTGAATCGTTTGTAGTAAAGCATAAGCCCGACACCTACAAGTGCGCG  
AACGCACCCACAAGCCGGCCTATGAAAAGTGACAGAAAGTTGAGAGTGGATGAGACAGGC  
GTGCACATGCCCTTGCGAGCCAGCAGACAACCCGTTCAAACTCGATAATGATCCTTCCGCA  
GGTTCACCTACGGAAACCTTGTTACGAACCTTCTCCT

>BSNB\_0298\_Penicillium\_sp

CCCCATACGCTCGAGGACCGGACGCGGTGCCGCCGCTGCCTTTCGGGGCCCGTCCCCCGGAAT  
CGGAGGACGGGGCCCAACACACAAGCCGGGCTTGAGGGCAGCAATGACGCTCGGACAGGC  
ATGCCCCCGGAATACCAGGGGGCGCAATGTGCGTTCAAAGACTCGATGATTCACTGAATTT  
GCAATTCACATTACGTATCGCATTTTCGCTGCGTTCTTCATCGATGCCGGAACCAAGAGATCC  
GTTGTTGAAAGTTTTAAATAATTTATATTTTCACTCAGACGACAATCTTCAGGCAGAGTTCCG  
GGTGTCTTTCGGCGGGCGCGGGCCCCGGGGCGTGAGCCCCCGGCGGGCCAGTTAAGGCGGG  
CCCCCGGAAGCAACGAGGTAAATAAACACGGGTGGGAGTTGGACCCAAAGGGCCCTCAC  
TCGGTAATGATCCTTCCGCAGGTTACCTACGTAAACCTTGTTACGACTTCTCC

>BSNB\_0299\_Muscodor\_sp

TTCTGCAATTCACATTACTTATCGCATTTTCGCTGCGTTCTTCATCGATGCCAGAACCAACAGA  
TCCGTTGTTGAAAGTTTTAACTTATTAAGTTTATGATTCGCAATTCCAAAGAAAACAGAGTTT  
AGTTGGCCGCCGGCGGGGATGACTACCGGGTAACAGATGTACCTGAGACTGCAGGGAAACC  
ACTAGGTGGTAATCCCCCGCAGGGTAGCCTCCGCCGCCGAAGCAACGAAGGTAAGTTCACA  
TAGGGTTGGGAGTTTAGAAAACCTCTGTAATGATCCCTCCGCTGGTTCACCAACGGAGACCTT  
GTTACGACTTCTCCTTAATGTCCACCCAGCTGTGAGTACGACCGCCGAACCAAGTCGCCCCAC  
TGGCAAGCCAAGGCACGGAACGTTGAGGTTACATTGTGGTTTTAAATAATTCAATGATCCC  
TCCCGCAGGTTACCTACGGAGACCTTGTTACGACTTCTCCC

>BSNB\_0300\_Xylaria\_sp

TTAACTTATTTAGTTATATGTTTCAGAATTCAATACTAAACAGAGTTTCGTGGGCCACCGGCAG  
GCTTACCCGCGTCTCCCGGGTAGGCCCTACAGGGTAGGGCGCTACGAGGTAGGCGCGACCT  
GCCGAGGCAACGTAAGGTATGTTACATGGGTTTGGGAGTTATAGAACTCTTTAATGATCCC  
TCCGCTGGTTCACCAACGGAGA

>BSNB\_0301\_Albonectria\_rigidiuscula

GATCCGAGGTCAACATTCAGAAGTTGGGGGTTTAAACGGCTTGGCCGCGCCGCGTTCCAGTTG  
CGAGGTGTTAGCTACTACGCAATGGAGGCTACAGCGAGACCGCCACTAGATTTGGGGGACG  
GCGACTATCGCCGATCCCCAACCAAGCCCGGGGGCTTGAGGGTTGAAATGACGCTCGAA  
CAGGCATGCCCGCCAGAATACTGGCGGGCGCAATGTGCGTTCAAAGATTCGATGATTCACT

GAATTCTGCAATTCACATTACTTATCGCATTTTCGCTGCGTTCTTCATCGATGCCAGAACCAAG  
AGATCCGTTGTTGAAAGTTTTGATTTATTTGTTTTGTTTTACTCAGAAGATCCACAAGAATAC  
ATAGAGTTTGGGGTTCCTCTGGCAGCGAGCAGCGCCCGATTTCTCGGAGCACCGTCGTTGAG  
TCTGCCGAGGCAAATTATAGGTATGTTACAGGGGTTTGGGAGTTGTAAACTCGGTAATGAT  
CCCTCCGCTGGTTCACCAACGGAGACCTTGTT

>BSNB\_0302\_Fusarium\_sp

GATCCGAGGTCAACATTCAGAAGTTGGGGGTTTAACGGCTTGGCCGCGCCGCGTTCCAGTTG  
CGAGGTGTTAGCTACTACGCAATGGAGGCTACAGCGAGACCGCCACTAGATTTGGGGGACG  
GCGACTATCGCCGATCCCCAACACCAAGCCCGGGGGCTTGAGGGTTGAAATGACGCTCGAA  
CAGGCATGCCCCGCCAGAATACTGGCGGGCGCAATGTGCGTTCAAAGATTCGATGATTCACT  
GAATTCTGCAATTCACATTACTTATCGCATTTTCGCTGCGTTCTTCATCGATGCCAGAACCAAG  
AGATCCGTTGTTGAAAGTTTTGATTTATTTGTTTTGTTTTACTCAGAAGATCCACAAGAATAC  
ATAGAGTTTGGGGTTCCTCTGGCAGCGAGCAGCGCCCGATTTCTCGGAGCACCGTCGTTGAG  
TCTGCCGAGGCAAATTATAGGTATGTTACAGGGGTTTGGGAGTTGTAAACTCGGTAATGAT  
CCCTCCGCTGGTTCACCAACGGAGACCTTGTT

>BSNB\_0303\_Fusarium\_sp

GATCCGAGGTCAACATTCAGAAGTTGGGGGTTTAACGGCTTGGCCGCGCCGCGTTCCAGTTG  
CGAGGTGTTAGCTACTACGCAATGGAGGCTACAGCGAGACCGCCACTAGATTTGGGGGACG  
GCGACTATCGCCGATCCCCAACACCAAGCCCGGGGGCTTGAGGGTTGAAATGACGCTCGAA  
CAGGCATGCCCCGCCAGAATACTGGCGGGCGCAATGTGCGTTCAAAGATTCGATGATTCACT  
GAATTCTGCAATTCACATTACTTATCGCATTTTCGCTGCGTTCTTCATCGATGCCAGAACCAAG  
AGATCCGTTGTTGAAAGTTTTGATTTATTTGTTTTGTTTTACTCAGAAGATCCACAAGAATAC  
ATAGAGTTTGGGGTTCCTCTGGCAGCGAGCAGCGCCCGATTTCTCGGAGCACCGTCGTTGAG  
TCTGCCGAGGCAAATTATAGGTATGTTACAGGGGTTTGGGAGTTGTAAACTCGGTAATGAT  
CCCTCCGCTGGTTCACCAACGGAGACCTTGTT

>BSNB\_0304\_Sordariomycetes\_sp

CCGAGGTCAAACCTCGTGGGGTGCGCGCCCGGGGGGGGGCGCGCGGTTTGCTGGCCGGCCGG  
CCGCCGGGCCCCGGAGCGAGATCGCTACTGCGCTCGGGGTGCGGCGGGGGCCGCCACTGCAT  
CTGGGGGGCCAGCGGCGGGCGCTGGGCCCCGACACCAGGGCGCGCCTGGGGGGGTTGACAT  
GACGCTCGGACGGGCGTGCCCGCCGAATGCCGGCGGGCGCAATGTGCGTTCAAAGATTCG  
ATGACTCACTGGATCTGCAATTCGCATTACGTATCGCATTTTCGCTGCGTTCTTCATCGATGCC  
AGAGCCAAGAGATCCGTTGCTGAAGGTTGTAGAAAGTTTGGGGGTCTGACAGGCCACACGG  
GACAGAGTACAGGGGCTCCCGGCAGGGCGACCGCCCTGCCGGAGCAGCACGTTGGGTAGG  
TTCGGAAGGGTGTCCAGGGCACAGAGGCGCTGTAACTTTAATGATCCCTCCGCTGGTTCACC  
AACGGAGACCTTGT

>BSNB\_0305\_Chaetomium\_sp

CTGATCCGAGGTCAACCTTGTAAGTTAGGGGGTTTTACGGCCGGTACGCACCGGGACGCCCG  
GAGCGAGGTTAAGCTACTGCGCTACGGGTCCAGGCGCGCCCGCCACTTCTTTTCAGGGCCCC  
CGGCAGCCGCGGGGGCCCCAACACCGAGCAGGGCTCGAGGGTTGAAATGACGCTCGAACAG  
GCATGCCCCCGCGGAATGCCGGCGGGCGCAATGTGCGTTCAAAGATTCGATGATTCGCTGAG  
TTCTGCAATTCACATTACTTATCGCATTTTCGCTGCGTTCTTCATCGATGCCAGAACCAAGAGA  
TCCGTTGTTGAAAGTTTTGACTCATTTAGTGTCTTCTCAGAGGGGCCTAAATTGCAAGAGTAT  
AGAGTGCCGCGGGCGGGCGCCCTTGCGGGCTGCGGCCCTCCCCGGGGCCGCCACCGAAG

CAACGTCTTCAGTACAAGTTCACAGGTGTGTATAGAGAGAATAGAACTCTATAATGATCCCT  
CCGCTGGTTCACCAACGGAG

>BSNB\_0516\_Oxydothis\_sp

TTAACTTATTAACAAGACGCTCAGATTTCCATAAATAACAGAGTTTAATGGTCCTCTGGCG  
GAGCCGCCGGGTAGTGGGGACCCCGCCGAGGCAACAAAGGTATGTTACATGGGTTTAGGA  
CATAATGTCTTGTAATGATCCCTCCGCTGGTTCACCAACGGAGA

>BSNB\_0520\_Diaporthes\_sp

AATTTTCAGAAAGTTGGGGGTTTAACGGCAGGGCGCCGCCAGGGCCTTCCAGAACGAGATATA  
ACTACTACGCTCGGGGTCTAGCGAGCTCGCCACTAGATTTTCAGGGCCTGCTTCTCTCGAAG  
CAGTGCCCCAACACCAAGCCAGGCTTGAGGGTTGAAATGACGCTCGAACAGGCATGCCCTC  
CGGAATACCAGAGGGCGCAATGTGCGTTCAAAGATTCGATGATTCACTGAATTCTGCAATTC  
ACATTACTTATCGCATTTTCGCTGCGTTCTTCATCGATGCCAGAACCAAGAGATCCGTTGTTGA  
AAGTTTTGATTCATTTATGTTTTTTTACTCAGAGATTTACTAAGAAACAAGAGTTTGGTTGGC  
CGCCGGCGGGCTGCTCCCCGTCTCCGGGGGGCCTCAGAAGAGAGGCCGGCCTGCGCCGAGG  
CAACAGTAAGGTATAAGTTCACAAAGGGTTTCTGGGTGCGCCGGGGCGCGTTCCAGCAATG  
ATCCCTCCGCTGGTTCACCAACGGAGACCTTGTTACGACTTCTCCT

>BSNB\_0523\_Stereum\_hirsutum

CTGATTTGAGGTCAAAGTTCGATGAAAGCTGTCCTTTCGGACGGTTAGAAAGCGCGTCTCCA  
CAGAAGCAAGCACACCACAGCGTAGATAATTATCACACCGAGGCGCACGTGCAACAAGA  
CGCACTAATGCATTTGAGAGGAGCCGAGCGGTGAAGCCCGCAAAGCCTCCAAGTCCAATC  
CACTACGTTTCACAAAAGTGAAGAGGGTTGAGAATTTACGACACTCAAACAGGTGTGCCCT  
TCGGAATACCAAAGGGCGCAAGGTGCGTTCAAAGATTCGATGATTCACTGAATTCTGCAATT  
CACATTACTTATCGCATTTTCGCTGCGTTCTTCATCGATGCGAGAGCCAAGAGATCCGTTGTTG  
AAAGTTGTATTAGATGCGTTTTATTACATCGAGTAGACATTCTTAAGACATACAAAGGGTGT  
GTAAAGGGACGCGAGCCTCTTCGAGTTAACGAAGAGACCCCCGCGAAGGTGCACAGGTGTG  
TGTGGATTAGTGAAAGGAGCGTGACATGCCGTTTTTAAAGGCCAGCTACAACCTCCAGTCAT  
AAATTTCAATTAATGATCCTTCCGCAGGTTACCTACGGAAACCTTGTTACGACTTCTCCT

>BSNB\_0526\_Pseudopezizomyces\_sp

TGATCCGAGGTCAACCACAAAAAATTGGGGGTTTAGCGGCTGGGAGCTGCAGCACCTAACA  
AAAGCGAGAAATAATTTACTACGCTCAGAGGATACCACAGATCCGCCGTTGTATTTAGGA  
ATTACATAACTGTAAATTCCCAACACTAAGCTAGGCTTAAGGGTTGAAATGACGCTCGAAC  
AGGCATGCCCCTAGAACTAATGCGCGCAATGTGCGTTCAAAGATTCGATGATTCACTGA  
ATTCTGCAATTCACATTACTTATCGCATTTTCGCTGCGTTCTTCATCGATGCCAGAACCAAGAG  
ATCCGTTGTTGAAAGTTTGAATTATTAATAAAGACGCTCAGATTACATAAAATAACAAGA  
GTTTAGTAGTCCACCGGCAGTTGCTACAGGGTAACCTGTCTCCAGGTACCAGGTAACTCTG  
CCGAGGCAACAAAAGGTAAAGTTCACATGGGTGGGAGTTTAGAAAACCTCTATAATGATCCC  
TCCGCTGGTTCACCAACGGAGACCTTGT

>BSNB\_0528\_Endomelanconopsis\_endophytica

GGAGAAGTTCGTAACAAGGTTTCCGTAGGTGAACCTGCGGAAGGATCATTACCGAGTTCTA  
GGGGTCTCCGGACCTCTTCTCTCACACCCTATGTGTATCTACCTCTGTTGCTTTGGCGGGCCG  
CGGTCTCCGCGGCCGGCCCCCTAACCGGGGCTGGCCAGCGCCCGCCAGAGGACTACCAAA  
CTCCAGTCAGTAAACGTAGCTGTCTGATCAAAAGTTTAATAAACTAAACCTTTCAACAACGG  
ATCTCTTGTTCTGGCATCGATGAAGAACGCAGCGAAATGCGATAAGTAATGTGAATTGCAG

AATTCAGTGAATCATCGAATCTTTGAACGCACATTGCGCCCCTTGGTATTCCGAGGGGCATG  
CCTGTTGAGCGTCATTTCAACCACTCAAGCTCTGCTTGGTATTGGGCGCCGTCCTTCACCGGA  
CGCGCCTCAAAGACCTCGGCGGTGGCGTCTTGCTCAAGCGTAGTAGAAAAACCTCGCTTT  
GGAGGACGGGACGTTGCTCGCCGGACGAACCTTCTGAATTTCTCAAGGTTGACCTCGGAT  
CAGGTA

>BSNB\_0529\_Colletotrichium\_gloeosporioides

CTACCTGATCCGAGGTCAACCTTTGGAAAATTGGGGGGTTTTACGGCAAGAGTCCCTCCGGA  
TCCCAGTGCGAGACGTAAAGTTACTACGCAAAGGAGGCTCCGGGAGGGTCCGCCACTACCT  
TTGAGGGCCTACATCAGCTGTAGGGCCCCAACACCAAGCAGAGCTTGAGGGTTGAAATGAC  
GCTCGAACAGGCATGCCCCGCCAGAATGCTGGCGGGCGCAATGTGCGTTCAAAGATTTCGATG  
ATTCACTGAATTCTGCAATTCACATTACTTATCGCATTTTCGCTGCGTTCTTCATCGATGCCAG  
AACCAAGAGATCCGTTGTTAAAAGTTTTGATTATTTGCTTGTACCACTCAGAAGAAACGTCG  
TTAAATCAGAGTTTGTTATCCTCCGGCGGGCGCCGACCCGCCCGGAGGCGGGAGGCCGGG  
AGGGTCGCGGAGACCCTACCCGCCGAAGCAACAGTTATAGGTATGTTCAAAAGGGTTATA  
GAGCGTAAACTCAGTAATGATCCCTCCGCTGGTTCACCAACGGAGACCTTGTTACGACTTCT  
CC

>BSNB\_0530\_Colletotrichium\_gloeosporioides

CTACCTGATCCGAGGTCAACCTTTGGAAAATTGGGGGGTTTTACGGCAAGAGTCCCTCCGGA  
TCCCAGTGCGAGACGTAAAGTTACTACGCAAAGGAGGCTCCGGGAGGGTCCGCCACTACCT  
TTGAGGGCCTACATCAGCTGTAGGGCCCCAACACCAAGCAGAGCTTGAGGGTTGAAATGAC  
GCTCGAACAGGCATGCCCCGCCAGAATGCTGGCGGGCGCAATGTGCGTTCAAAGATTTCGATG  
ATTCACTGAATTCTGCAATTCACATTACTTATCGCATTTTCGCTGCGTTCTTCATCGATGCCAG  
AACCAAGAGATCCGTTGTTAAAAGTTTTGATTATTTGCTTGTACCACTCAGAAGAAACGTCG  
TTAAATCAGAGTTTGTTATCCTCCGGCGGGCGCCGACCCGCCCGGAGGCGGGAGGCCGGG  
AGGGTCGCGGAGACCCTACCCGCCGAAGCAACAGTTATAGGTATGTTCAAAAGGGTTATA  
GAGCGTAAACTCAGTAATGATCCCTCCGCTGGTTCACCAACGGAGACCTTGTTACGACTTCT  
CC

>BSNB\_0531\_Stereum\_hirsutum

CTGATTTGAGGTCAAAGTTTCGATGAAAGCTGTCCTTTTCGGACGGTTAGAAAGCGCGTCTCCA  
CAGAAGCAAGCACACCACAGCGTAGATAATTATCACACCGAGGCGCACGTGCAACAAGA  
CGCACTAATGCATTTGAGAGGAGCCGAGCGGTGAAGCCCGCAAAGCCTCCAAGTCCAATC  
CACTACGTTTCAAAAAGTGAAGAGGGTTGAGAATTTACGACACTCAAACAGGTGTGCCCT  
TCGGAATACCAAAGGGCGCAAGGTGCGTTCAAAGATTTCGATGATTCACTGAATTCTGCAATT  
CACATTACTTATCGCATTTTCGCTGCGTTCTTCATCGATGCGAGAGCCAAGAGATCCGTTGTTG  
AAAGTTGTATTAGATGCGTTTTATTACATCGAGTAGACATTCTTAAGACATACAAAGGGTGT  
GTAAAGGGACGCGAGCCTCTTCGAGTTAACGAAGAGACCCCCGCGAAGGTGCACAGGTGTG  
TGTGGATTAGTGAAAGGAGCGTGACATGCCGTTTTTAAAGGCCAGCTACAACTCCAGTCAT  
AAATTCATTAATGATCCTTCCGCAGGTTACCTACGGAAACCTTGTTACGACTTCTCTCT

>BSNB\_0532\_Stereum\_hirsutum

CTGATTTGAGGTCAAAGTTTCGATGAAAGCTGTCCTTTTCGGACGGTTAGAAAGCGCGTCTCCA  
CAGAAGCAAGCACACCACAGCGTAGATAATTATCACACCGAGGCGCACGTGCAACAAGA  
CGCACTAATGCATTTGAGAGGAGCCGAGCGGTGAAGCCCGCAAAGCCTCCAAGTCCAATC  
CACTACGTTTCAAAAAGTGAAGAGGGTTGAGAATTTACGACACTCAAACAGGTGTGCCCT  
TCGGAATACCAAAGGGCGCAAGGTGCGTTCAAAGATTTCGATGATTCACTGAATTCTGCAATT

CACATTACTTATCGCATTTTCGCTGCGTTCTTCATCGATGCGAGAGCCAAGAGATCCGTTGTTG  
AAAGTTGTATTAGATGCGTTTTATTACATCGAGTAGACATTCTTAAGACATACAAAGGGTGT  
GTAAAGGGACGCGAGCCTCTTCGAGTTAACGAAGAGACCCCCGCGAAGGTGCACAGGTGTG  
TGTGGATTAGTGAAAGGAGCGTGACATGCCGTTTTTAAAGGCCAGCTACAACCTCCAGTCAT  
AAATTTTATTAAATGATCCTTCCGCAGGTTACCTACGGAAACCTTGTTACGACTTCTCCT

>BSNB\_0534\_Nodulisporium\_sp

CCTAATCCGAGGTCAACCACTAGAAAATAGGGGGTTTTACGGCTAGCAGCCAGGGCCACCA  
CACAAGCGAGAGAGATTACTACGCTGAGAGTGACCCTAACTCCGCCACTGGTTTTTCAGGA  
ACTACGCCGAAGCCGTAGACTCCCAACACTAAGCAACAGGGCTTAAGGGTTGAAATGACGC  
TCGAATAGGCATGCCCACTAGAATACTAATGGGCGCAATGTGCGTTCAAAGATTTCGATGATT  
CACTGAATTCTGCAATTACATTACTTATCGCATTTTCGCTGCGTTCTTCATCGATGCCAGAAC  
CAAGAGATCCGTTGTTGAAAGTTTTAACTTATTTAGTTAAGTACTCAGAGATACAGCTGTA  
AAAACAAGAGTTTAAATGGTCCTGCGGCGGGCCTTCACGCGGCTACAGGGTAGCTCCAGGGT  
AGACACCTACAGGGTAGATGCCTCCAGGGCAGCTACAGGGTAACCGCAGCACGCGCCGAG  
GAAACGACGGTAAGGTTACAAAGGGTTTTGGAGTTTGGTAACTCATTAAATGATCCCTCCGC  
TGGTTCACCAACGGAGACCTTGTTACG

>BSNB\_0535\_Coriolopsis\_rigida

AGAAGTCGTAACAAGGTCTCCGTTGGTGAACCAGCGGAGGGATCATTGCTGGAACGCGCCC  
CTGGCGCACCCAGAAACCCTTTGTGAACCTTATACCTTACTGTTGCCTCGGCGCAGGCCGCCC  
CCTATGGGGTCCCTCGGAGACGAGGAGCAGCCGGCCGGTGGCCAAGTTAACTCTGTTTTTAC  
ACTGAAACTCTGAGTATAAAACATAAAATGAATCAAACTTTCAACAACGGATCTCTTGGTTC  
TGGCATCGATGAAGAACGCAGCGAAATGCGATAAGTAATGTGAATTGCAGAATTCAGTGAA  
TCATCGAATCTTTGAACGCACATTGCGCCCTCTGGTATTCCGGAGGGCATGCCTGTTTCGAGC  
GTCATTTCAACCCTCAAGCCTGGCTTGGTGTGGGGCACTGCTTTACCCACAAGCAGGCCCT  
GAAATATAGTGGCGAGCTCGCCAGGACTCCGAGCGTAGTAGTTAAACCCTCGCTTTGGAAG  
GCCTGGCGGTGCCCTGCCGTTAAACCCCAACTTTTGAAAATTGACCTCGGATCAG

>BSNB\_0536\_Colletotrichum\_gloeosporioides

CTACCTGATCCGAGGTCAACCTTTGGAAAATTGGGGGGTTTTACGGCAAGAGTCCCTCCGGA  
TCCCAGTGCGAGACGTAAAGTTACTACGCAAAGGAGGCTCCGGGAGGGTCCGCCACTACCT  
TTGAGGGCCTACATCAGCTGTAGGGCCCCAACACCAAGCAGAGCTTGAGGGTTGAAATGAC  
GCTCGAACAGGCATGCCCGCCAGAATGCTGGCGGGCGCAATGTGCGTTCAAAGATTTCGATG  
ATTCACTGAATTCTGCAATTCACATTACTTATCGCATTTTCGCTGCGTTCTTCATCGATGCCAG  
AACCAAGAGATCCGTTGTTAAAGTTTTGATTATTTGCTTGTACCACTCAGAAGAAACGTCG  
TTAAATCAGAGTTTGGTTATCCTCCGGCGGGCGCCGACCCGCCCAGGCGGGAGGCCGGG  
AGGGTCGCGGAGACCCTACCCGCCGAAGCAACAGTTATAGGTATGTTACAAAGGGTTATA  
GAGCGTAAACTCAGTAATGATCCCTCCGCTGGTTCACCAACGGAGACCTTGTTACGACTTCT  
CC

>BSNB\_0537\_Colletotrichum\_gloeosporioides

CTACCTGATCCGAGGTCAACCTTTGGAAAATTGGGGGGTTTTACGGCAAGAGTCCCTCCGGA  
TCCCAGTGCGAGACGTAAAGTTACTACGCAAAGGAGGCTCCGGGAGGGTCCGCCACTACCT  
TTGAGGGCCTACATCAGCTGTAGGGCCCCAACACCAAGCAGAGCTTGAGGGTTGAAATGAC  
GCTCGAACAGGCATGCCCGCCAGAATGCTGGCGGGCGCAATGTGCGTTCAAAGATTTCGATG  
ATTCACTGAATTCTGCAATTCACATTACTTATCGCATTTTCGCTGCGTTCTTCATCGATGCCAG  
AACCAAGAGATCCGTTGTTAAAGTTTTGATTATTTGCTTGTACCACTCAGAAGAAACGTCG

TTAAATCAGAGTTTGGTTATCCTCCGGCGGGCGCCGACCCGCCCGGAGGCGGGAGGCCGGG  
AGGGTCGCGGAGACCCTACCCGCCGAAGCAACAGTTATAGGTATGTTACAAAGGGTTATA  
GAGCGTAAACTCAGTAATGATCCCTCCGCTGGTTCACCAACGGAGACCTTGTTACGACTTCT  
CC

>BSNB\_0538\_Colletotrichum\_gloeosporioides

CTGATCCGAGGTCAACCTTTGGAAAATTGGGGGGTTTTACGGCAAGAGTCCCTCCGGATCCC  
AGTGCGAGACGTAAAGTTACTACGCAAAGGAGGCTCCGGGAGGGTCCGCCACTACCTTTGA  
GGGCCTACATCAGCTGTAGGGCCCCAACACCAAGCAGAGCTTGAGGGTTGAAATGACGCTC  
GAACAGGCATGCCCGCCAGAATGCTGGCGGGCGCAATGTGCGTTCAAAGATTCGATGATTC  
ACTGAATTCTGCAATTCACATTACTTATCGCATTTTCGCTGCGTTCTTCATCGATGCCAGAACC  
AAGAGATCCGTTGTAAAGTTTTGATTATTTGCTTGTACCACTCAGAAGAAACGTCGTAA  
ATCAGAGTTTGGTTATCCTCCGGCGGGCGCCGACCCGCCCGGGGGGGCGGGAGGCCGGGAG  
GGTCACGGGGACCCTACCCGCCGAAGCAACAGTTGTAGGTATGTTACAAAGGGTTGTAGA  
GCGTAAACTCAGTAATGATCCCTCCGCTGGTTCACCAACGGAGACCTTGTTA

>BSNB\_0539\_Nemania\_sp

TGATCCGAGGTCAACCTTTAAAAATTGGGGTGTTTTACGGCAGGGGACCGGTCCAGCTACAG  
GCGAGGTGAAAATCTACTACGTCTGGAGTGTGAACCGACCACGCCACTAACTTTAGGGAGC  
TACGCTTCCGTAGGCTCCCAACGCTAAGCAACAGGGGCTTAAGGGTTGAAATGACGCTCGA  
ACAGGCATGCCCACTAGAATACTAATGGGCGCAATGTGCGTTCAAAGATTCGATGATTCACT  
GAATTCTGCAATTCACATTACTTATCGCATTTTCGCTGCGTTCTTCATCGATGCCAGAACCAAG  
AGATCCGTTGTTGAAAGTTTTAACTTATTTAGTTATACGTTTCAAATGCTAAACAGAG  
TTTTGCGAGCCGCCGGCAGGTTCCCCCAGCGCCCCCTAAAGCAAGCCCTACAATGTAGGG  
GCGCTACAGGGTAGGCCAGGGCCTGCCGAGGCAACAGAAGGTATGTTACAGGGGTTTGGG  
AGTTGTAAAAACTCTTTAATGATCCCTCCGCTGGTTCACCAACGGAGACCT

>BSNB\_0540\_Colletotrichum\_gloeosporioides

CTACCTGATCCGAGGTCAACCTTTGGAAAATTGGGGGGTTTTACGGCAAGAGTCCCTCCGGA  
TCCCAGTGCGAGACGTAAAGTTACTACGCAAAGGAGGCTCCGGGAGGGTCCGCCACTACCT  
TTGAGGGCCTACATCAGCTGTAGGGCCCCAACACCAAGCAGAGCTTGAGGGTTGAAATGAC  
GCTCGAACAGGCATGCCCGCCAGAATGCTGGCGGGCGCAATGTGCGTTCAAAGATTCGATG  
ATTCACTGAATTCTGCAATTCACATTACTTATCGCATTTTCGCTGCGTTCTTCATCGATGCCAG  
AACCAAGAGATCCGTTGTAAAGTTTTGATTATTTGCTTGTACCACTCAGAAGAAACGTCG  
TTAAATCAGAGTTTGGTTATCCTCCGGCGGGCGCCGACCCGCCCGGAGGCGGGAGGCCGGG  
AGGGTCGCGGAGACCCTACCCGCCGAAGCAACAGTTATAGGTATGTTACAAAGGGTTATA  
GAGCGTAAACTCAGTAATGATCCCTCCGCTGGTTCACCAACGGAGACCTTGTTACGACTTCT  
CC

>BSNB\_0541\_Diaporthes\_sp

TACCTGATCCGAGGTCAAAATTTTCAAAGTTGGGGGTTTAAACGGCAGGGCGCCGCCAGGGC  
CTTCCAGAACGAGATATACTACTACGCTCGGGGTCTAGCGAGCTCGCCACTAGATTTCAA  
GGCCTGCCCTTTTACAGGCAGTGCCCCAACACCAAGCCAGGCTTGAGGGTTGAAATGACGC  
TCGAACAGGCATGCCCTCCGGAATACCAGAGGGCGCAATGTGCGTTCAAAGATTCGATGAT  
TCACTGAATTCTGCAATTCACATTACTTATCGCATTTTCGCTGCGTTCTTCATCGATGCCAGAA  
CCAAGAGATCCGTTGTTGAAAGTTTTGATTCAATTTATGTTTTTTTACTCAGAGATTCATAAG  
AAACAAGAGTTTGGTTGGCCGCCGGGCTGCTCCCCGTTTCCGGGGGGGCTCGAAGAGA  
GGCCGGCCTTCGCCGAGGCAACAATAGGTATAAGTTCACAAAGGGTTTCTGGGTGCGCCGA

AGCGCGTTCCAGCAATGATCCCTCCGCTGGTTCACCAACGGAGACCTTGTTACGACCTTCTC  
C

>BSNB\_0546\_Clonostachys\_sp

ACTTCGCAGAGGAGGCCACGACGGGTCCGCCACTAGATTTAGGGGCCGGCCGTCCCTCGCG  
GGCTTTGGCCGATCCCCAACACCACGCCCTAGGGGCATGAGGGTTGAAATGACGCTCAGAC  
AGGCATGCCCCGCCAGAATACTGGCGGGCGCAATGTGCGTTCAAAGATTTCGATGATTCACTG  
AATTCTGCAATTACATTACTTATCGCATTTTCGCTGCGTTCTTCATCGATGCCAGAACCAAGA  
GATCCGTTGTTGAAAGTTTTTATTTATTTGTAAAAACTACTCAGAAGATTCCAAAATAAAAC  
AAGAATTAAGTTTCTAGGCGGGCGCCTGATCCGGGGCACACGAGGCGCCCGGGGCAATCC  
CGCCGAAGCAACAGTAGGTATGTTACATGGGTTTGGGAGTTGTAAACTCGGTAATGATCCC  
TCCGCTGGTTCACCAACGGAGACCTTGTTACGACTTCTCCT

>BSNB\_0548\_Stereum\_hirsutum

AGGAGAAGTCGTAACAAGGTTTCCGTAGGTGAACCTGCGGAAGGATCATTAATGAAATTTA  
TGACTGGAGTTGTAGCTGGCCTTTAAAAACGGCATGTGCACGCTCCTTTACTAATCCACAC  
ACACCTGTGCACCTTCGCGGGGGTCTCTTCGTAACTCGAAGAGGCTCGCGTCCCTTTACAC  
ACCCTTTGTATGTCTTAAGAATGTCTACTCGATGTAATAAAACGCATCTAATACAACTTTCAA  
CAACGGATCTCTTGGCTCTCGCATCGATGAAGAACGCAGCGAAATGCGATAAGTAATGTGA  
ATTGCAGAATTCAGTGAATCATCGAATCTTTGAACGCACCTTGCGCCCTTTGGTATTCCGAAG  
GGCACACCTGTTTGAGTGTGCGTGAATTTCTCAACCCTCTTCACTTTTGTGAACGTAGTGGATT  
GGACTTGGAGGCTTTGCCGGGCTTCACCGCTCGGCTCCTCTCAAATGCATTAGTGCCTTGT  
TGCGACGTGCGCCTCGGTGTGATAATTATCTACGCTGTGGTGTGCTTGCTTCTGTGGAGACGC  
GCTTTCTAACCGTCCGAAAGGACAGCTTTCATCGAACTTTGACCTCAAATCAG

>BSNB\_0549\_Colletotrichum\_sp

CTACCTGATCCGAGGTCAACCTTTGGAAAAATTGGGGGGTTTTACGGCAAGAGTCCCTCCGGA  
TCCAGTGCGAGACGTAAAGTTACTACGCAAAGGAGGCTCCGGGAGGGTCCGCCACTACCT  
TTGAGGGCCTACATCAGCTGTAGGGCCCCAACACCAAGCAGAGCTTGAGGGTTGAAATGAC  
GCTCGAACAGGCATGCCCCGCCAGAATGCTGGCGGGCGCAATGTGCGTTCAAAGATTTCGATG  
ATTCACTGAATTCTGCAATTCACATTACTTATCGCATTTTCGCTGCGTTCTTCATCGATGCCAG  
AACCAAGAGATCCGTTGTTAAAAAGTTTTGATTATTTGCTTGTACCACTCAGAAGAAACGTCG  
TTAAATCAGAGTTTGGTTATCCTCCGGCGGGCGCCGACCCGCCCGAGGCGGGAGGCCGGG  
AGGGTCGCGGAGACCCTACCCGCCGAAGCAACAGTTATAGGTATGTTACAAAGGGTTATA  
GAGCGTAAACTCAGTAATGATCCCTCCGCTGGTTCACCAACGGAGACCTTGTTACGACTTCT  
CC

>BSNB\_0550\_Stereum\_sp

CTGATTTGAGGTCAAAGTTTCGATGAAAGCTGTCCTTTTCGGACGGTTAGAAAGCGCGTCTCCA  
CAGAAGCAAGCACACCACAGCGTAGATAATTATCACACCGAGGCGCACGTCGCAACAAGA  
CGCACTAATGCATTTGAGAGGAGCCGAGCGGTGAAGCCCGGCAAAGCCTCCAAGTCCAATC  
CACTACGTTACAAAAAGTGAAGAGGGTTGAGAATTTACGACACTCAAACAGGTGTGCCCT  
TCGGAATACCAAAGGGCGCAAGGTGCGTTCAAAGATTTCGATGATTCACTGAATTCTGCAATT  
CACATTACTTATCGCATTTTCGCTGCGTTCTTCATCGATGCGAGAGCCAAGAGATCCGTTGTTG  
AAAGTTGTATTAGATGCGTTTTATTACATCGAGTAGACATTCTTAAGACATACAAAGGGTGT  
GTAAAGGGACGCGAGCCTCTTCGAGTTAACGAAGAGACCCCCGGAAGGTGCACAGGTGTG

TGTGGATTAGTGAAAGGAGCGTGACATGCCGTTTTTAAAGGCCAGCTACAACCTCCAGTCAT  
AAATTTTCATTAATGATCCTTCCGCAGGTTACCTACGGAAACCTTGTTACGACTTCTCCT

>BSNB\_0551\_Colletotrichum\_gloeosporioides

CCTGATCCGAGGTCAACCTTTGGAGATTTGGGGGTTTTACGGCAAGAGTCCCTCCGGATCCC  
AGTGCGAGACGTAAAGTTACTACGCAAAGGAGGCTCCGGGAGGGTCCGCCACTACCTTTGA  
GGCCTACATCGGCTGTAGGGCCCCAACACCAAGCAGAGCTTGAGGGTTGAAATGACGCTC  
GAACAGGCATGCCCGCCAGAATGCTGGCGGGCGCAATGTGCGTTCAAAGATTTCGATGATTC  
ACTGAATTCTGCAATTCACATTACTTATCGCATTTTCGCTGCGTTCTTCATCGATGCCAGAACC  
AAGAGATCCGTTGTTAAAAGTTTTGATTATTTGCTTGTACCACTCAGAAGAAACGTCGTTAA  
ATCAGAGTTTGTTATCCTCCGGCGGGCGCCGACCCGCCCCGGGGGCGGGAGGCCGGGAGGG  
TCACGGAGACCCTGCCCGCCGAAGCAACAGTTATAGGTATGTTACAAAGGGTTGTAGAGC  
GTAAACTCAGTAATGATCCCTCCGCTGGTTCACCAACGGAGACCTTGTT

>BSNB\_0556\_Neopestalotiopsis\_sp

CTGATCCGAGGTCAACCACAAAAAATTGGGGGTTTAGCGGCTGGGAGTTATAGCACCTAAC  
AAAAGCGAGAAAAAAATTACTACGCTCAGAGGATACTACAAATCCGCCGTTGTATTTTCAGG  
AACTACAACCTCTAAGAGAAGTAGATTCCCAACACTAAGCTAGGCTTAAGGGTTGAAATGA  
CGCTCGAACAGGCATGCCCACTAGAATACTAATGGGCGCAATGTGCGTTCAAAGATTTCGAT  
GATTCATGAATTCTGCAATTCACATTACTTATCGCATTTTCGCTGCGTTCTTCATCGATGCCA  
GAACCAAGAGATCCGTTGTTGAAAGTTTTGACTTATTAATAAAGACGCTCAGATTACATAA  
AATAACAAGAGTTAATGGTCCACCGGCAGCAGCTATAAGAAGACCTATAACTTCTGCCGA  
GGCAACAAAAGGTAAGTTCACATGGGTTGGGAGTTTAGAAAACTCTATAATGATCCCTCCG  
CTGGTTCACCAACGGAGACCTTG

>BSNB\_0557\_Colletotrichum\_vietnamense

TGATCCGAGGTCAACCTTTGGAAAAATTGGGGGGTTTTACGGCTAGAGTCCCTCCGAATCCCA  
GTGCGAGACAAAAGTTACTACGCAAAGGAGGCTCCGAGAGGGTCCGCCACTACCTTTGAGG  
GCCTACGTCAACCGTAGAGCCCCAACGCCAAGCAGTGCTTGAGGGTTGAAATGACGCTCGA  
ACAGGCATGCCCGCCAGAATGCTGGCGGGCGCAATGTGCGTTCAAAGATTTCGATGATTCAC  
TGAATTCTGCAATTCACATTACTTATCGCATTTTCGCTGCGTTCTTCATCGATGCCAGAACCA  
GAGATCCGTTGTTAAAAGTTTTGATTATTTGCTTGTGCCACTCAGAAGAAACGTCGTTAAATC  
AGAGTTTGGTTATCCTCCGGCGGGCACCCCGACGAGCGGGGCCGGGAGCGGGCCGCAGTGG  
CCGCGCTGCCCGCCGAAGCAACAGTTGTAGGTATGTTACAAAGGGTTATAGAGCGGTAAC  
TCAGTAATGATCCCTCCGCTGGTTCACCAACGGAGACCTTGTTACGAACCTTCTC

>BSNB\_0558\_Stereum\_hirsutum

CTGATTTGAGGTCAAAGTTTCGATGAAAGCTGTCCTTTCGGACGGTTAGAAAGCGCGTCTCCA  
CAGAAGCAAGCACACCACAGCGTAGATAATTATCACACCGAGGCGCACGTGCAACAAGA  
CGCACTAATGCATTTGAGAGGAGCCGAGCGGTGAAGCCCGCAAAGCCTCCAAGTCCAATC  
CACTACGTTACAAAAAGTGAAGAGGGTTGAGAATTTACGACACTCAAACAGGTGTGCCCT  
TCGGAATACCAAAGGGCGCAAGGTGCGTTCAAAGATTTCGATGATTCATGAATTCTGCAATT  
CACATTACTTATCGCATTTTCGCTGCGTTCTTCATCGATGCGAGAGCCAAGAGATCCGTTGTTG  
AAAGTTGTATTAGATGCGTTTTATTACATCGAGTAGACATTCTTAAGACATACAAAGGGTGT  
GTAAAGGGACGCGAGCCTCTTCGAGTTAACGAAGAGACCCCCGGAAGGTGCACAGGTGTG  
TGTGGATTAGTGAAAGGAGCGTGACATGCCGTTTTTAAAGGCCAGCTACAACCTCCAGTCAT  
AAATTTTCATTAATGATCCTTCCGCAGGTTACCTACGGAAACCTTGTTACGACTTCTCCT



>BSNB\_0559\_Colletotrichum\_gleoesporioides

CCTGATCCGAGGTCAACCTTTGGAGATTTGGGGGTTTACGGCAAGAGTCCCTCCGGATCCC  
AGTGCGAGACGTAAAGTTACTACGCAAAGGAGGCTCCGGGAGGGTCCGCCACTACCTTTGA  
GGGCCTACATCGGCTGTAGGGCCCCAACACCAAGCAGAGCTTGAGGGTTGAAATGACGCTC  
GAACAGGCATGCCCCGCCAGAATGCTGGCGGGCGCAATGTGCGTTCAAAGATTCGATGATTC  
ACTGAATTCTGCAATTCACATTACTTATCGCATTTTCGCTGCGTTCTTCATCGATGCCAGAACC  
AAGAGATCCGTTGTAAAGTTTTGATTATTTGCTTGTACCACTCAGAAGAAACGTCGTAA  
ATCAGAGTTTGGTTATCCTCCGGCGGGCGCCGACCCGCCCGGGGGCGGGAGGCCGGGAGGG  
TCACGGAGACCCTGCCCCGCCGAAGCAACAGTTATAGGTATGTTACAAAGGGTTGTAGAGC  
GTAAACTCAGTAATGATCCCTCCGCTGGTTCACCAACGGAGACCTTGTT

>BSNB\_0574\_Colletotrichum\_gleoesporioides

CCTGATCCGAGGTCAACCTTTGGAGATTTGGGGGTTTACGGCAAGAGTCCCTCCGGATCCC  
AGTGCGAGACGTAAAGTTACTACGCAAAGGAGGCTCCGGGAGGGTCCGCCACTACCTTTGA  
GGGCCTACATCGGCTGTAGGGCCCCAACACCAAGCAGAGCTTGAGGGTTGAAATGACGCTC  
GAACAGGCATGCCCCGCCAGAATGCTGGCGGGCGCAATGTGCGTTCAAAGATTCGATGATTC  
ACTGAATTCTGCAATTCACATTACTTATCGCATTTTCGCTGCGTTCTTCATCGATGCCAGAACC  
AAGAGATCCGTTGTAAAGTTTTGATTATTTGCTTGTACCACTCAGAAGAAACGTCGTAA  
ATCAGAGTTTGGTTATCCTCCGGCGGGCGCCGACCCGCCCGGGGGCGGGAGGCCGGGAGGG  
TCACGGAGACCCTGCCCCGCCGAAGCAACAGTTATAGGTATGTTACAAAGGGTTGTAGAGC  
GTAAACTCAGTAATGATCCCTCCGCTGGTTCACCAACGGAGACCTTGTT

>BSNB\_0575\_Fusarium\_concolor

GGTCAACATTCAGAAGTTGGGGTTTAAACGGCGTGGCCGCGACGATTACCAGTAACGAGGTG  
TAATTACTACGCTATGGAAGCTCGACGTGACCGCCAATAGATTTGGGGACCGCGGATTGCTC  
CACGAATCCCAACACCAAGCTGTGCTTGAGGGTTGAAATGACGCTCGAACAGGCATGCCCC  
CCAGAATACTGGCGGGCGCAATGTGCGTTCAAAGATTCGATGATTCACTGAATTCTGCAATT  
CACATTACTTATCGCATTTTGCTGCGTTCTTCATCGATGCCAGAACCAAGAGATCCGTTGTTG  
AAAGTTTTGATTATTTGTTTGTCTTACTCAGAAGTTACACTAGAAACAGAGTTTAGGGTCCT  
CTGGCGGGCCGTCCCGTTTTACCGGGGCGGGGCTGATCCGCCGAGGCAACAATAGGTATGTT  
CACAGGGGTTTGGGAGTTGTAAACTCGGTAATGATCCCTCCGCTGGTTCACCAACGGAGACC  
TTGTT

>BSNB\_0578\_Diaporthe\_sp

GATCCGAGGTCAAAATTTCAGAAGTTGGGGGTTTAAACGGCAGGGCGCCGCCAGGGCCTTCC  
AGAACGAGATATAACTACTACGCTCGGGGTCTAGCGAGCTCGCCACTAGATTTAGGGGCC  
TGCTTTGTCTCCAAAGCAGTGCCCCAACACCAAGCCAGGCTTGAGGGTTGAAATGACGCTCG  
AACAGGCATGCCCTCCGAATACCAGAGGGCGCAATGTGCGTTCAAAGATTCGATGATTCA  
CTGAATTCTGCAATTCACATTACTTATCGCATTTTCGCTGCGTTCTTCATCGATGCCAGAACCA  
AGAGATCCGTTGTTGAAAGTTTTGATTATTTATGTTTTTACTCAGAGATTCACCAAGAAAC  
AAGAGTTTGGTTGGCCGCCGGCGGGGCTGCTCCCCGTCTCCGGGGGGCCTCAGAAGAGGCCG  
GCCTTCGCCGAGGCAACAATAAGGTATAAGTTCACAAAGGGTTTCTGGGTGCGCCGGGGCG  
CGTTCCAGCAATGATCCCTCCGCTGGTTCACCAACGGAGACC

>BSNB\_0579\_Cladosporium\_cladosporioides

CTGATCCGAGGTCACCTTAGAAATGGGGTTGTTTTACGGCGTAGCCTCCCGAACACCCTTTA

GCGAATAGTTTCCACAACGCTTAGGGGACAGAAGACCCAGCCGGTCGATTTGAGGCACGCG  
GCGGACCGCGTTGCCCAATACCAAGCGAGGCTTGAGTGGTGAAATGACGCTCGAACAGGCA  
TGCCCCCGGAATACCAGGGGGCGCAATGTGCGTTCAAAGATTTCGATGATTCACTGAATTCT  
GCAATTCACATTACTTATCGCATTTCGCTGCGTTCTTCATCGATGCCAGAACCAAGAGATCCG  
TTGTTAAAAGTTTAAATTTATTAATTAAGTTTACTCAGACTGCAAAGTTACGCAAGAGTTTGA  
AGTGTCCACCCGGAGCCCCGCCCCGAAGGCAGGGTCGCCCCGGAGGCAACAGAGTCGGAC  
AACAAAGGGTTATGAACATCCCGGTGGTTAGACCGGGGTCACCTTGTAATGATCCCTCCGCAG  
GTTACCTACGGAGACCTTGTTACG

>BSNB\_0580\_Colletotrichum\_gloeosporioides

CTACCTGATCCGAGGTCAACCTTTGGAAAAATTGGGGGGTTTTACGGCAAGAGTCCCTCCGGA  
TCCCAGTGCGAGACGTAAAGTTACTACGCAAAGGAGGCTCCGGGAGGGTCCGCCACTACCT  
TTGAGGGCCTACATCAGCTGTAGGGCCCCAACACCAAGCAGAGCTTGAGGGTTGAAATGAC  
GCTCGAACAGGCATGCCCCGCCAGAATGCTGGCGGGCGCAATGTGCGTTCAAAGATTTCGATG  
ATTCACTGAATTCTGCAATTCACATTACTTATCGCATTTCGCTGCGTTCTTCATCGATGCCAG  
AACCAAGAGATCCGTTGTTAAAAGTTTTGATTATTTGCTTGTACCACTCAGAAGAAACGTCG  
TTAAATCAGAGTTTGGTTATCCTCCGGCGGGCGCCGACCCGCCCGAGGCGGGAGGCCGGG  
AGGGTCGCGGAGACCCTACCCGCCGAAGCAACAGTTATAGGTATGTTACAAAGGGTTATA  
GAGCGTAAACTCAGTAATGATCCCTCCGCTGGTTCACCAACGGAGACCTTGTTACGACTTCT  
CC

>BSNB\_0581\_Fusarium\_sp

TAGGAGAAGTCGTAACAAGGTCTCCGTTGGTGAACCAGCGGAGGGATCATTACCGAGTTTA  
CAACTCCCAAACCCCTGTGAACATACCTATTGTTGCCTCGGCGGATCAGCCCCGGCCCCGTA  
AAACGGGACGGCCCCGCCAGAGGACCCTAAACTCTGTTTCTAGTGTAACCTCTGAGTAAAAC  
AAACAAATAAATCAAACTTTCAACAACGGATCTCTTGGTTCTGGCATCGATGAAGAACGC  
AGCAAAATGCGATAAGTAATGTGAATTGCAGAATTCAAGTGAATCATCGAATCTTTGAACGC  
ACATTGCGCCCCGCCAGTATTCTGGCGGGCATGCCTGTTGAGCGGTCATTTCAACCCTCAAGC  
ACAGCTTGGTGTGTTGGGATTTCGTGGAGCAATCCGCGGTCCCCAAATCTATTGGCGGTCACGTC  
GAGCTTCCATAGCGTAGTAATTACACCTCGTTACTGGTAATCGTCGCGGCCACGCCGTTAAA  
CCCCAACTTCTGAATGTTGACCTCGGATCAGGTA

>BSNB\_0582\_Endomelanconiosis\_endophytica

ACCTGATCCGAGGTCAACCTTGAGAAAAATTCAGAAGGTTTCGTCCGGCGAGCGAACGTCCCG  
TCCTCCAAAGCGAGGTGTTTTCTACTACGCTTGAGGCAAGACGCCACCGCCGAGGTCTTTGA  
GGCGCGTCCGGTGAAGGACGGCGCCCCAATACCAAGCGAGGCTTGAGTGGTGAAATGACGCT  
CGAACAGGCATGCCCTCGGAATACCAAGGGGCGCAATGTGCGTTCAAAGATTTCGATGATT  
CACTGAATTCTGCAATTCACATTACTTATCGCATTTCGCTGCGTTCTTCATCGATGCCAGAAC  
CAAGAGATCCGTTGTTGAAAGTTTTAGTTTATTAAGTTTGTATCAGACAGCTACGTTTACTG  
ACTGGAGTTTGGTAGTCCTCTGGCGGGCGCTGGCCAGCCCCGGTTAGGGGGCCCGGCCGCG  
AGGACCGCGGCCCCGCCAAAGCAACAGAGGTAGGTACACATAGGGTGTGAGAGAAGAGGTC  
CGAAGACCCCTAGAACTCGGTAATGATCCTTCCGCAGGTTACCTACGGAAACCTTGTTACG  
AACTTCTCCT

>BSNB\_0583\_Colletotrichum\_sp

ATCCGAGGTCAACCTTTGGAAAAATTGGGGGTTTTACGGCTAGAGTCCCTCCGAATCCCAGTG  
CGAGACGAAAAGTTACTACGCAAAGGAGGCTCCGAGAGGGTCCGCCACTACCTTTGAGGGC  
CTACGTCGACCGTAGAGCCCCAACGCCAAGCGGTGCTTGAGGGTTGAAATGACGCTCGAAC

AGGCATGCCCCGCCAGAATGCTGGCGGGCGCAATGTGCGTTCAAAGATTTCGATGATTCACTG  
AATTCTGCAATTCACATTACTTATCGCATTTTCGCTGCGTTCTTCATCGATGCCAGAACCAAGA  
GATCCGTTGTTAAAGTTTTGATTATTTGCTTGTGCCACTCAGAAGAAACGTCGCTAAATCAG  
AGTTTGGTTATCCTCCGGCGGGCACCCCGACGAGCGGGGCCGGGAGCGGGCCGCAGTGGCC  
GCGCTGCCCCGCCGAAGCAACGGTTATAGGTATGTTACAAAGGGTTATAGAGCGGTAACCTC  
AGTAATGATCCCTCCGCTGGTTCACCAACGGAGACCTTGTTAC

>BSNB\_0584\_Endomelanconiosis\_endophytica

AGGAGAAGTTCGTAACAAGGTTTCCGTAGGTGAACCTGCGGAAGGATCATTACCGAGTTCT  
AGGGGTCTTCGGACCTCTTCTCTCACACCCTATGTGTACCTACCTCTGTTGCTTTGGCGGGCC  
GCGGTCCTCCGCGGCCGGCCCCCTAACCAGGGGCTGGCCAGCGCCCGCCAGAGGACTACCAA  
ACTCCAGTCAGTAAACGTAGCTGTCTGATCAAAAGTTTAATAAACTAAAACCTTTCAACAACG  
GATCTCTTGGTTCTGGCATCGATGAAGAACGCAGCGAAATGCGATAAGTAATGTGAATTGCA  
GAATTCAGTGAATCATCGAATCTTTGAACGCACATTGCGCCCCCTTGGTATTCCGAGGGGCAT  
GCCTGTTTCGAGCGTCATTTACCACTCAAGCTCTGCTTGGTATTGGGCGCCGTCCTTCACCGG  
ACGCGCCTCAAAGACCTCGGCGGTGGCGTCTTGCCTCAAGCGTAGTAGAAAACACCTCGCTT  
TGGAGGACGGGACGTTTCGCTCGCCGGACGAACCTTCTGAATTTTCTCAAGGTTGACCTCGGA  
TCAGGT

>BSNB\_0586\_Xylaria\_sp

GGATCCGAGGTCAACCTTTAAAAATTGGGGTGTTTTACGGCAGGGGACCGGTCCAGCTACA  
GGCGAGGTGAAAATCTACTACGTCTGGAGTGTGAACCGACCACGCCACTAACTTTAGGGAG  
CTACGTTCCGTAGGCTCCCAACGCTAAGCAACAGGGGCTTAAGGGTTGAAATGACGCTCG  
AACAGGCATGCCCACTAGAATACTAATGGGCGCAATGTGCGTTCAAAGATTTCGATGATTCA  
CTGAATTCTGCAATTCACATTACTTATCGCATTTTCGCTGCGTTCTTCATCGATGCCAGAACCA  
AGAGATCCGTTGTTGAAAGTTTTAACTTATTTAGTTATACGTTTCAGAATTCAATGCTAAACAG  
AGTTTTGCGGGCCGCCGGCAGGTTCCCCCAGCGCCCCCTAAAGCAGGCCCTACAATGTA  
GGGCGCTACAGGGTAGGCCAGGGCCTGCCGAGGCAACAGAAGGTATGTTACAGGGGTTT  
GGGAGTTGTAAAACTCTTTAATGATCCCTCCGCTGGTTCACCAACGGAGACC

>BSNB\_0587\_Endomelanconiosis\_sp

GGAGAAGTTCGTAACAAGGTTTCCGTAGGTGAACCTGCGGAAGGATCATTACCGAGTTCTA  
GGGGTCTCCGGACCTCTTCTCTCACACCCTATGTGTATCTACCTCTGTTGCTTTGGCGGGCCG  
CGGTCCTCCGCGGCCGGCCCCCTAACCAGGGGCTGGCCAGCGCCCGCCAGAGGACTACCAA  
CTCCAGTCAGTAAACGTAGCTGTCTGATCAAAAGTTTAATAAACTAAAACCTTTCAACAACGG  
ATCTCTTGTTTCTGGCATCGATGAAGAACGCAGCGAAATGCGATAAGTAATGTGAATTGCAG  
AATTCAGTGAATCATCGAATCTTTGAACGCACATTGCGCCCCCTTGGTATTCCGAGGGGCATG  
CCTGTTTCGAGCGTCATTTACCACTCAAGCTCTGCTTGGTATTGGGCGCCGTCCTTCACCGGA  
CGCGCCTCAAAGACCTCGGCGGTGGCGTCTTGCCTCAAGCGTAGTAGAAAACACCTCGCTTT  
GGAGGACGGGACGTTTCGCTCGCCGGACGAACCTTCTGAATTTTCTCAAGGTTGACCTCGGAT  
CAGGTA

>BSNB\_0588\_Endomelanconiosis\_endophytica

AGGAGAAGTTCGTAACAAGGTTTCCGTAGGTGAACCTGCGGAAGGATCATTACCGAGTTCT  
AGGGGTCTTCGGACCTCTTCTCTCACACCCTATGTGTACCTACCTCTGTTGCTTTGGCGGGCC  
GCGGTCCTCCGCGGCCGGCCCCCTAACCAGGGGCTGGCCAGCGCCCGCCAGAGGACTACCAA  
ACTCCAGTCAGTAAACGTAGCTGTCTGATCAAAAGTTTAATAAACTAAAACCTTTCAACAACG  
GATCTCTTGGTTCTGGCATCGATGAAGAACGCAGCGAAATGCGATAAGTAATGTGAATTGCA

GAATTCAGTGAATCATCGAATCTTTGAACGCACATTGCGCCCCCTTGGTATTCCGAGGGGCAT  
GCCTGTTTCGAGCGTCATTTCACTCAAGCTCTGCTTGGTATTGGGCGCCGTCCTTCACCGG  
ACGCGCCTCAAAGACCTCGGCGGTGGCGTCTTGCCTCAAGCGTAGTAGAAAACACCTCGCTT  
TGGAGGACGGGACGTTTCGCTCGCCGGACGAACCTTCTGAATTTCTCAAGGTTGACCTCGGA  
TCAGGT

>BSNB\_0589\_Cladosporium\_sp

CGTAACAAGGTCTCCGTAGGTGAACCTGCGGAGGGATCATTACAAGTGACCCCGGTCTAAC  
CACCGGGATGTTTATAACCTTTGTTGTCCGACTCTGTTGCCTCCGGGGCGACCCTGCCTTCG  
GGCGGGGGCTCCGGGTGGACACTTCAAACCTTTCGTAACCTTTCAGTCTGAGTAACTTAA  
TTAATAAATTAATACTTTTAACAACGGATCTCTTGGTTCTGGCATCGATGAAGAACGCAGCG  
AAATGCGATAAGTAATGTGAATTGCAGAATTCAGTGAATCATCGAATCTTTGAACGCACATT  
GCGCCCCCTGGTATTCCGGGGGGCATGCCTGTTTCGAGCGTCATTTCACTCAAGCCTCGC  
TTGGTATTGGGCAACGCGGTCCGCGCGTGCCTCAAATCGACCGGCTGGGTCTTCTGTCCCT  
AAGCGTTGTGAAACTATTCGCTAAAGGGTGTTCGGGAGGCTACGCCGTAAACAACCCCA  
TTTCTAAGGTGACCTCGGATCAG

>BSNB\_0590\_Colletotrichum\_gloeosporioides

CTACCTGATCCGAGGTCAACCTTTGGAAAATTGGGGGGTTTTACGGCAAGAGTCCCTCCGGA  
TCCCAGTGCGAGACGTAAAGTTACTACGCAAAGGAGGCTCCGGGAGGGTCCGCCACTACCT  
TTGAGGGCCTACATCAGCTGTAGGGCCCCAACACCAAGCAGAGCTTGAGGGTTGAAATGAC  
GCTCGAACAGGCATGCCCCGCCAGAATGCTGGCGGGCGCAATGTGCGTTCAAAGATTTCGATG  
ATTCATGAATTCTGCAATTCACATTACTTATCGCATTTTCGCTGCGTTCTTCATCGATGCCAG  
AACCAAGAGATCCGTTGTAAAAGTTTTGATTATTTGCTTGTACCACTCAGAAGAAACGTCG  
TTAAATCAGAGTTTGGTTATCCTCCGGCGGGCGCCGACCCGCCCGAGGCGGGAGGCCGGG  
AGGGTCGCGGAGACCCTACCCGCCGAAGCAACAGTTATAGGTATGTTACAAAGGGTTATA  
GAGCGTAAACTCAGTAATGATCCCTCCGCTGGTTCACCAACGGAGACCTTGTTACGACTTCT  
CC

>BSNB\_0615\_Colletotrichum\_fruticola

CCTTGATCCGAGGTCCACCTTTGGAAAATTGGGGGGTTTTACGGCAAGAGTCCCTCCGGATCC  
AGTGCGAGACGTAAAGTTACTACGCAAAGGAGGCTCCGGGAGGGTCCGCCACTACCTTTGA  
GGGCCTACATCAGCTGTAGGGCCCCAACACCAAGCAGAGCTCGAGGGTTGAAATGACGCTC  
GAACAGGCATGCCCCGCCAGAATGCTGGCGGGCGCAATGTGCGTTCAAAGATTTCGATGATTC  
ACTGAATTCTGCAATTCACATTACTTATCGCATTTTCGCTGCGTTCTTCATCGATGCCAGAACC  
AAGAGATCCGTTGTAAAAGTTTTGATTATTTGCTTGTACCACTCAGAAGAAACGTCGTAA  
ATCAGAGTTTGGTTATCCTCCGGCGGGCGCCGACCCGCCCGAGGCGGGAGGCCGGGAGGG  
TCGCGGAGACCCTACCCGCCGAAGCAACAGTTATAGGTATGTTACAAAGGGTTATAGAGC  
GTAAACTCAGTAATGATCCCTCCGCTGGTTCACCAACGG

>BSNB\_0622\_Colletotrichum\_gloeosporioides

CTACCTGATCCGAGGTCAACCTTTGGAAAATTGGGGGGTTTTACGGCAAGAGTCCCTCCGGA  
TCCCAGTGCGAGACGTAAAGTTACTACGCAAAGGAGGCTCCGGGAGGGTCCGCCACTACCT  
TTGAGGGCCTACATCAGCTGTAGGGCCCCAACACCAAGCAGAGCTTGAGGGTTGAAATGAC  
GCTCGAACAGGCATGCCCCGCCAGAATGCTGGCGGGCGCAATGTGCGTTCAAAGATTTCGATG  
ATTCATGAATTCTGCAATTCACATTACTTATCGCATTTTCGCTGCGTTCTTCATCGATGCCAG  
AACCAAGAGATCCGTTGTAAAAGTTTTGATTATTTGCTTGTACCACTCAGAAGAAACGTCG  
TTAAATCAGAGTTTGGTTATCCTCCGGCGGGCGCCGACCCGCCCGAGGCGGGAGGCCGGG

AGGGTCGCGGAGACCCTACCCGCCGAAGCAACAGTTATAGGTATGTTACAAAGGGTTATA  
GAGCGTAAACTCAGTAATGATCCCTCCGCTGGTTCACCAACGGAGACCTTGTTACGACTTCT  
CC

>BSNB\_0623\_Colletotrichum\_gloeosporioides

GTCAACCTTTGGAAAATTGGGGGTTTTACGGCTAGAGTCCCTCCGGATCCCAGTGCGAGACG  
TAAAGTTACTACGCAAAGGAGGCTCCGGGAGGGTCCGCCACTACCTTTGAGGGCCTACATC  
AGCTGTAGGGCCCCAACACCAAGCAGAGCTTGAGGGTTGAAATGACGCTCGAACAGGCATG  
CCCGCCAGAATGCTGGCGGGCGCAATGTGCGTTCAAAGATTCGATGATTCACTGAATTCTGC  
AATTCACATTACTTATCGCATTTTCGCTGCGTTCTTCATCGATGCCAGAACCAAGAGATCCGTT  
GTTAAAAGTTTTGATTATTTGCTTGTACCACTCAGAAGAAACGTCGTTAAATCAGAGTTTGGT  
TATCCTCCGGCGGGCGCCGACCCGCCGGGGCGGGAGGCCGGGAGGGTTCGCGGAGACCC  
TACCCGCCGAAGCAACAGTTATAGGTATGTTACAAAGGGTTATAGAGCGTAAACTCAGTA  
ATGATCCCTCCGCTGGTTAACCAACGGAGACCTTGTTA

>BSNB\_0624\_Thanatephorus\_cucumberis

AGTTCAGAAATTTTGTCCGAAGACGTTAGAAGCGCGAACACTAGAATACCCTCCACAGCAA  
CGCAGATAATTATCACGCTGAAGCGGCTGGTAACGTTTCGACTAATGCATTTTCAGAGGAGCC  
GACTACGAGAGCCGGCAGCAGCTCCAAGTCCAAGCCTTCGTCAATAAAGCCGAAGGTTGAG  
AATTCCATGAGACTCAAACAGGCATGCTCCTCGGAATACCAAGGAGCGCAAGGTGCGTTCA  
AAGATTCGATGATTCACTGAATTCTGCAATTCACATTACTTATCGCATTTTCGCTGCGTTCTTCA  
TCGATGCGAGAGCCAAGAGATCCGTTGCTGAAAAGTTGTATATAAATTGCGTTATAGCAAAGT  
ATGACATTCTAAACTGAATCGTTTGTAGTAAAGCATAAGCCCGACACCTACAAGTGCGCG  
AACGCACCCACAAGCCGGCCTATGAAAAGTGACAGAAAGTTGAGAGTGGATGAGACAGGC  
GTGCACATGCCCTTTCGAGCCAGCAGACAACCCGTTCAAAACTCGATAATGATCCTTCGCA  
GGTTCACCTACGGAAACCTTGTTACGAACTTCTCCT

>BSNB\_0625\_Colletotrichum\_gloeosporioides

CCTGATCCGAGGTCAACCTTTGGAGATTTGGGGGTTTTACGGCAAGAGTCCCTCCGGATCCC  
AGTGCGAGACGTAAAGTTACTACGCAAAGGAGGCTCCGGGAGGGTCCGCCACTACCTTTGA  
GGGCCTACATCGGCTGTAGGGCCCCAACACCAAGCAGAGCTTGAGGGTTGAAATGACGCTC  
GAACAGGCATGCCCGCCAGAATGCTGGCGGGCGCAATGTGCGTTCAAAGATTCGATGATT  
ACTGAATTCTGCAATTCACATTACTTATCGCATTTTCGCTGCGTTCTTCATCGATGCCAGAACC  
AAGAGATCCGTTGTTAAAAGTTTTGATTATTTGCTTGTACCACTCAGAAGAAACGTCGTTAA  
ATCAGAGTTTGGTTATCCTCCGGCGGGCGCCGACCCGCCGGGGCGGGAGGCCGGGAGGG  
TCACGGAGACCCTGCCCGCCGAAGCAACAGTTATAGGTATGTTACAAAGGGTTGTAGAGC  
GTAAACTCAGTAATGATCCCTCCGCTGGTTCACCAACGGAGACCTTGTT

>BSNB\_0627\_Colletotrichum\_sp

GTCAACCTTTGGAAAATTGGGGGTTTTACGGCTAGAGTCCCTCCGGATCCCAGTGCGAGACG  
TAAAGTTACTACGCAAAGGAGGCTCCGGGAGGGTCCGCCACTACCTTTGAGGGCCTACATC  
AGCTGTAGGGCCCCAACACCAAGCAGAGCTTGAGGGTTGAAATGACGCTCGAACAGGCATG  
CCCGCCAGAATGCTGGCGGGCGCAATGTGCGTTCAAAGATTCGATGATTCACTGAATTCTGC  
AATTCACATTACTTATCGCATTTTCGCTGCGTTCTTCATCGATGCCAGAACCAAGAGATCCGTT  
GTTAAAAGTTTTGATTATTTGCTTGTACCACTCAGAAGAAACGTCGTTAAATCAGAGTTTGGT  
TATCCTCCGGCGGGCGCCGACCCGCCGGGGCGGGAGGCCGGGAGGGTTCGCGGAGACCC  
TACCCGCCGAAGCAACAGTTATAGGTATGTTACAAAGGGTTATAGAGCGTAAACTCAGTA  
ATGATCCCTCCGCTGGTTAACCAACGGAGACCTTGTTA

>BSNB\_0628\_Colletotrichum\_theobromicola

CTGATCCGAGGTCAACCTTTGGAAAATTGGGGGGTTTTACGGCAAGAGTCCCTCCGGATCCC  
AGTGCGAGACGTAAAGTTACTACGCAAAGGAGGCTCCGGGAGGGTCCGCCACTACCTTTGA  
GGGCCTACATCAGCTGTAGGGCCCCAACACCAAGCAGAGCTTGAGGGTTGAAATGACGCTC  
GAACAGGCATGCCCGCCAGAATGCTGGCGGGCGCAATGTGCGTTCAAAGATTCGATGATTC  
ACTGAATTCTGCAATTCACATTACTTATCGCATTTTCGCTGCGTTCTTCATCGATGCCAGAACC  
AAGAGATCCGTTGTAAAGTTTTGATTATTTGCTTGTACCACTCAGAAGAAACGTCGTAA  
ATCAGAGTTTGGTTATCCTCCGGCGGGCGCCGACCCGCCCGGGGGGGCGGGAGGCCGGGAG  
GGTCACGGGGACCCTACCCGCCGAAGCAACAGTTGTAGGTATGTTACAAAGGGTTGTAGA  
GCGTAAACTCAGTAATGATCCCTCCGCTGGTTCACCAACGGAGACCTTGTTA

>BSNB\_0637\_Colletotrichum\_theobromicola

CTGATCCGAGGTCAACCTTTGGAAAATTGGGGGGTTTTACGGCAAGAGTCCCTCCGGATCCC  
AGTGCGAGACGTAAAGTTACTACGCAAAGGAGGCTCCGGGAGGGTCCGCCACTACCTTTGA  
GGGCCTACATCAGCTGTAGGGCCCCAACACCAAGCAGAGCTTGAGGGTTGAAATGACGCTC  
GAACAGGCATGCCCGCCAGAATGCTGGCGGGCGCAATGTGCGTTCAAAGATTCGATGATTC  
ACTGAATTCTGCAATTCACATTACTTATCGCATTTTCGCTGCGTTCTTCATCGATGCCAGAACC  
AAGAGATCCGTTGTAAAGTTTTGATTATTTGCTTGTACCACTCAGAAGAAACGTCGTAA  
ATCAGAGTTTGGTTATCCTCCGGCGGGCGCCGACCCGCCCGGGGGGGCGGGAGGCCGGGAG  
GGTCACGGGGACCCTACCCGCCGAAGCAACAGTTGTAGGTATGTTACAAAGGGTTGTAGA  
GCGTAAACTCAGTAATGATCCCTCCGCTGGTTCACCAACGGAGACCTTGTTA

>BSNB\_0638\_Cladosporium\_cladosporioides

CTGATCCGAGGTACACCTTAGAAATGGGGTTGTTTTACGGCGTAGCCTCCCGAACACCCTTTA  
GCGAATAGTTTCCACAACGCTTAGGGGACAGAAGACCCAGCCGGTCGATTTGAGGCACGCG  
GCGGACCGCGTTGCCCAATACCAAGCGAGGCTTGAGTGGTGAAATGACGCTCGAACAGGCA  
TGCCCCCGGAATACCAGGGGGCGCAATGTGCGTTCAAAGATTCGATGATTACTGAATTCT  
GCAATTCACATTACTTATCGCATTTTCGCTGCGTTCTTCATCGATGCCAGAACCAAGAGATCCG  
TTGTTAAAAGTTTAAATTTATTAATTAAGTTTACTCAGACTGCAAAGTTACGCAAGAGTTTGA  
AGTGTCCACCCGGAGCCCCCGCCGAAGGCAGGGTCGCCCCGGAGGCAACAGAGTCGGAC  
AACAAAGGGTTATGAACATCCCGGTGGTTAGACCGGGGTCACTTGTAATGATCCCTCCGCAG  
GTTACCTACGGAGACCTTGTTACG

>BSNB\_0641\_Cladosporium\_cladosporioides

CTGATCCGAGGTCAACCTTTGGAAAATTGGGGGGTTTTACGGCAAGAGTCCCTCCGGATCCC  
AGTGCGAGACGAAATGTTACTACGCAAAGGAGGCTCCGGGAGGGTCCGCCACTACCTTTGA  
GGGCCTACGTCGACCGTAGAGCCCCAACACCAAGCAGAGCTTGAGGGTTGAAATGACGCTC  
GAACAGGCATGCCCGCCAGAATGCTGGCGGGCGCAATGTGCGTTCAAAGATTCGATGATTC  
ACTGAATTCTGCAATTCACATTACTTATCGCATTTTCGCTGCGTTCTTCATCGATGCCAGAACC  
AAGAGATCCGTTGTAAAGTTTTGATTATTTTGTATGCCACTCAGAAGAAACGTCGTAC  
AATAGAGTTTGGTTATCCTCCGGCGGGCGCCGGGTCCGGTCCCGCGGGGGGTCCGGTCCGGG  
CCGGGAGGCGTCTTTTTCAGGGGACGGCCTACCCGCCGAAGCAACAGTTGTAGGTATGTTCA  
CAAAGGGTTATAGAGCGGTAACCTCAGTAATGATCCCTCCGCTGGTTCACCAACGGAGACCTT  
GTTACGACTTCTCC

>BSNB\_0642\_Hypoxylon\_investiens

CTAATCCGAGGTCAACCACTAGAAAATATAGGGGTTTTAACGGCCAGCAGCCAGGGCCACC

ACACGAGCGAGAGAAATTACTACGCTGAGAGTGTACCCTAACTCCGCCACTAACTTTGAGG  
AACTACGCCGTAGATTCCCAACGCTAAGCAACAGGGGCTTAGGGGTGCAAATGACGCTCGA  
ATAGGCATGCCCACTAGAATACTAGTGGGCGCAATGTGCGTTCAAAGATTTCGATGATTCACT  
GAATTCTGCAATTCACATTACTTATCGCATTTTCGCTGCGTTCTTCATCGATGCCAGAACCAAG  
AGATCCGTTGTTGAAAGTTTTAACTTATTTTCAGTTTAGAATTCAGAGAAACAGTGGTAAAAA  
CAAGAGTTTAACGGTCCTTCGGCGGGGCCGAAGCCGACTACAGGGTAGCTCCAGGGTAGCTC  
TAGGGTAGCTATAGGGTAGCTGCAGGGTAAGTGCAGGGTAGCTATAGGGTAACTCTAGGGT  
AGCTCCAGGGTAGTTACAGGGTAGCCGTAGCTCACGCCGAGGCAACGACGGTAAGGTTTAC  
AAAGGGTTTGGAGTTTTGATAACTCAGTAATGATCCCTCCGCTGGTTCACCAACGGAGACCT  
TGTTACAACCTTCTCCT

>BSNB\_0644\_Diaporthe\_sp

ACCTGATCCGAGGTCAAAATTTTCAGAAGTTGGGGGTTTAAACGGCAGGGCACCGCCAGGGCC  
TTCCAGAACGAGATATAACTACTACGCTCGGGGTCTAGCGAGCTCGCCACTAGATTTTCAGG  
GCCTGCCTTGCTCCAAGGCAGTGCCCCAACACCAAGCCAGGCTTGAGGGTTGAAATGACG  
CTCGAACAGGCATGCCCTCCGGAATACCAGAGGGGCGCAATGTGCGTTCAAAGATTTCGATGA  
TTCACTGAATTCTGCAATTCACATTACTTATCGCATTTTCGCTGCGTTCTTCATCGATGCCAGA  
ACCAAGAGATCCGTTGTTGAAAGTTTTGATTCATTTATGTTTTTTTTACTCAGAGATTCACTAA  
GAAACAAGAGTTTGGTTGGCCGCCGGCGGGCTGCTCCCCGTCTCCGGGGGGCCTCAGAAGA  
GAGGCCGGCCTTCGCCGAGGCAACAATAAGGTATAAGTTCACAAAGGGTTTCTGGGTGCGC  
CGGGGCGCGTTCCAGCAATGATCCCTCCGCTGGTTCACCAACGGAGACCTTGTT

>BSNB\_0645\_Colletotrichum\_theobromicola

TGATCCGAGGTCAACCTTTGGAAAATTGGGGGGTTTTACGGCAAGAGTCCCTCCGGATCCCA  
GTGCGAGACGTAAAGTTACTACGCAAAGGAGGCTCCGGGAGGGTCCGCCACTACCTTTGAG  
GGCCTACATCAGCTGTAGGGCCCCAACACCAAGCAGAGCTTGAGGGTTGAAATGACGCTCG  
AACAGGCATGCCCGCCAGAATGCTGGCGGGCGCAATGTGCGTTCAAAGATTTCGATGATTCA  
CTGAATTCTGCAATTCACATTACTTATCGCATTTTCGCTGCGTTCTTCATCGATGCCAGAACCA  
AGAGATCCGTTGTTAAAAGTTTTAATTATTTGCTTGTACCACTCAGAAGAAACGTCGTTAAAT  
CAGAGTTTGGTTATCCTCCGGCGGGCGCCGACCCGCCCGGGGGGGCGGGAGGCCGGGAGGG  
TCACGGGGACCTACCCGCCGAAGCAACAGTTGTAGGTATGTTACAAAGGGTTGTAGAGC  
GTAACCTCAGTAATGATCCCTCCGCTGGTTCACCAACGGAGACC

>BSNB\_0646\_Colletotrichum\_gloeosporioides

CTACCTGATCCGAGGTCAACCTTTGGAAAATTGGGGGGTTTTACGGCAAGAGTCCCTCCGGA  
TCCAGTGCGAGACGTAAAGTTACTACGCAAAGGAGGCTCCGGGAGGGTCCGCCACTACCT  
TTGAGGGCCTACATCAGCTGTAGGGCCCCAACACCAAGCAGAGCTTGAGGGTTGAAATGAC  
GCTCGAACAGGCATGCCCGCCAGAATGCTGGCGGGCGCAATGTGCGTTCAAAGATTTCGATG  
ATTCACTGAATTCTGCAATTCACATTACTTATCGCATTTTCGCTGCGTTCTTCATCGATGCCAG  
AACCAAGAGATCCGTTGTTAAAAGTTTTGATTATTTGCTTGTACCACTCAGAAGAAACGTCG  
TTAAATCAGAGTTTGGTTATCCTCCGGCGGGCGCCGACCCGCCCGGAGGCGGGAGGCCGGG  
AGGGTCGCGGAGACCCTACCCGCCGAAGCAACAGTTATAGGTATGTTACAAAGGGTTATA  
GAGCGTAAACTCAGTAATGATCCCTCCGCTGGTTCACCAACGGAGACCTTGTTACGACTTCT  
CC

>BSNB\_0647\_Fusarium\_sp

TGATCCGAGGTCAACATTCAGAAGTTGGGGTTTAAACGGCGTGGCCGCGACGATTACAGTA  
ACGAGGTGTAATTACTACGCTATGGAAGCTCGACGTGACCGCCAATAGATTTGGGGACCGC

GGATTGCTCCACGAATCCCAACACCAAGCTGTGCTTGAGGGTTGAAATGACGCTCGAACAG  
GCATGCCCCGCCAGAATACTGGCGGGCGCAATGTGCGTTCAAAGATTTCGATGATTCACTGAAT  
TCTGCAATTCACATTACTTATCGCATTTTGTGCGTTCTTCATCGATGCCAGAACCAAGAGAT  
CCGTTGTTGAAAGTTTTGATTTATTTGTTTGTCTTACTCAGAAGTTACACTAGAAACAGAGTTT  
AGGGTCCTCTGGCGGGCCGTCCTCGTTTACCGGGGCGGGCTGATCCGCCGAGGCAACAAT  
AGGTATGTTACAGGGGTTTGGGAGTTGTAAACTCGGTAATGATCCCTCCGCTGGTTCACCA  
ACGGAGACCTTGTTACGACTTCTC

>BSNB\_0649\_Colletotrichum\_gloeosporioides

CTACCTGATCCGAGGTCAACCTTTGGAAAATTGGGGGGTTTTACGGCAAGAGTCCCTCCGGA  
TCCAGTGCGAGACGTAAAGTTACTACGCAAAGGAGGCTCCGGGAGGGTCCGCCACTACCT  
TTGAGGGCCTACATCAGCTGTAGGGCCCCAACACCAAGCAGAGCTTGAGGGTTGAAATGAC  
GCTCGAACAGGCATGCCCCGCCAGAATGCTGGCGGGCGCAATGTGCGTTCAAAGATTTCGATG  
ATTCACTGAATTCTGCAATTCACATTACTTATCGCATTTTCGCTGCGTTCTTCATCGATGCCAG  
AACCAAGAGATCCGTTGTTAAAAGTTTTGATTATTTGCTTGTACCACTCAGAAGAAACGTCG  
TTAAATCAGAGTTTGGTTATCCTCCGGCGGGCGCCGACCCGCCCGAGGCGGGAGGCCGGG  
AGGGTCGCGGAGACCCTACCCGCCGAAGCAACAGTTATAGGTATGTTACAAAGGGTTATA  
GAGCGTAAACTCAGTAATGATCCCTCCGCTGGTTCACCAACGGAGACCTTGTTACGACTTCT  
CC

>BSNB\_0650\_Colletotrichum\_gloeosporioides

CTGATCCGAGGTCAACCTTTGGAAAATTGGGGGGTTTTACGGCAAGAGTCCCTCCGGATCCC  
AGTGCGAGACGAAATGTTACTACGCAAAGGAGGCTCCGGGAGGGTCCGCCACTACCTTTGA  
GGGCCTACGTCGACCGTAGAGCCCCAACACCAAGCAGAGCTTGAGGGTTGAAATGACGCTC  
GAACAGGCATGCCCCGCCAGAATGCTGGCGGGCGCAATGTGCGTTCAAAGATTTCGATGATTC  
ACTGAATTCTGCAATTCACATTACTTATCGCATTTTCGCTGCGTTCTTCATCGATGCCAGAACC  
AAGAGATCCGTTGTTAAAAGTTTTGATTATTTGCTTATGCCACTCAGAAGAAACGTCGTTAC  
AATAGAGTTTGGTTATCCTCCGGCGGGCGCCGGGTCCGGTCCCGCGGGGGGTCCGGTCCGGG  
CCGGGAGGCGTCCTTTTCAGGGGACGCGCTACCCGCCGAAGCAACAGTTGTAGGTATGTTCA  
CAAAGGGTTATAGAGCGGTAACCTCAGTAATGATCCCTCCGCTGGTTCACCAACGGAGACCTT  
GTTACGACTTCTCC

>BSNB\_0651\_Fusarium\_sp

TGATCCGAGGTCAACATTCAGAAGTTGGGGTTTAAACGGCGTGGCCGCGACGATTACAGTA  
ACGAGGTGTAATTACTACGCTATGGAAGCTCGACGTGACCGCCAATAGATTTGGGGACCGC  
GGATTGCTCCACGAATCCCAACACCAAGCTGTGCTTGAGGGTTGAAATGACGCTCGAACAG  
GCATGCCCCGCCAGAATACTGGCGGGCGCAATGTGCGTTCAAAGATTTCGATGATTCACTGAAT  
TCTGCAATTCACATTACTTATCGCATTTTGTGCGTTCTTCATCGATGCCAGAACCAAGAGAT  
CCGTTGTTGAAAGTTTTGATTTATTTGTTTGTCTTACTCAGAAGTTACACTAGAAACAGAGTTT  
AGGGTCCTCTGGCGGGCCGTCCTCGTTTACCGGGGCGGGCTGATCCGCCGAGGCAACAAT  
AGGTATGTTACAGGGGTTTGGGAGTTGTAAACTCGGTAATGATCCCTCCGCTGGTTCACCA  
ACGGAGACCTTGTTACGACTTCTC

>BSNB\_0652\_Colletotrichum\_theobromicola

CTGATCCGAGGTCAACCTTTGGAAAATTGGGGGGTTTTACGGCAAGAGTCCCTCCGGATCCC  
AGTGCGAGACGTAAAGTTACTACGCAAAGGAGGCTCCGGGAGGGTCCGCCACTACCTTTGA  
GGGCCTACATCAGCTGTAGGGCCCCAACACCAAGCAGAGCTTGAGGGTTGAAATGACGCTC  
GAACAGGCATGCCCCGCCAGAATGCTGGCGGGCGCAATGTGCGTTCAAAGATTTCGATGATTC



ACTGAATTCTGCAATTCACATTACTTATCGCATTTTCGCTGCGTTCTTCATCGATGCCAGAACC  
AAGAGATCCGTTGTATAAAGTTTTGATTATTTGCTTGTACCACTCAGAAGAAACGTCGTAA  
ATCAGAGTTTGGTTATCCTCCGGCGGGCGCCGACCCGCCCCGGGGGGCGGGAGGCCGGGAG  
GGTCACGGGGACCCTACCCGCCGAAGCAACAGTTGTAGGTATGTTACAAAGGGTTGTAGA  
GCGTAAACTCAGTAATGATCCCTCCGCTGGTTCACCAACGGAGACCTTGTTA

>BSNB\_0653\_Colletotrichum\_gloeosporioides

CTACCTGATCCGAGGTCAACCTTTGGAAAATTGGGGGGTTTTACGGCAAGAGTCCCTCCGGA  
TCCAGTGCGAGACGTAAAGTTACTACGCAAAGGAGGCTCCGGGAGGGTCCGCCACTACCT  
TTGAGGGCCTACATCAGCTGTAGGGCCCCAACACCAAGCAGAGCTTGAGGGTTGAAATGAC  
GCTCGAACAGGCATGCCCCGCCAGAATGCTGGCGGGCGCAATGTGCGTTCAAAGATTTCGATG  
ATTCATGAATTCTGCAATTCACATTACTTATCGCATTTTCGCTGCGTTCTTCATCGATGCCAG  
AACCAAGAGATCCGTTGTATAAAGTTTTGATTATTTGCTTGTACCACTCAGAAGAAACGTCG  
TTAAATCAGAGTTTGGTTATCCTCCGGCGGGCGCCGACCCGCCCCGAGGCGGGAGGCCGGG  
AGGGTCGCGGAGACCCTACCCGCCGAAGCAACAGTTATAGGTATGTTACAAAGGGTTATA  
GAGCGTAAACTCAGTAATGATCCCTCCGCTGGTTCACCAACGGAGACCTTGTTACGACTTCT  
CC

>BSNB\_0654\_Colletotrichum\_gloeosporioides

CTGATCCGAGGTCAACCTTTGGAAAATTGGGGGGTTTTACGGCAAGAGTCCCTCCGGATCCC  
AGTGCGAGACGAAATGTTACTACGCAAAGGAGGCTCCGGGAGGGTCCGCCACTACCTTTGA  
GGGCCTACGTCGACCGTAGAGCCCCAACACCAAGCAGAGCTTGAGGGTTGAAATGACGCTC  
GAACAGGCATGCCCCGCCAGAATGCTGGCGGGCGCAATGTGCGTTCAAAGATTTCGATGATTC  
ACTGAATTCTGCAATTCACATTACTTATCGCATTTTCGCTGCGTTCTTCATCGATGCCAGAACC  
AAGAGATCCGTTGTATAAAGTTTTGATTATTTGCTTATGCCACTCAGAAGAAACGTCGTTAC  
AATAGAGTTTGGTTATCCTCCGGCGGGCGCCGGGTCCGGTCCCGCGGGGGGTCCGGTCCGGG  
CCGGGAGGCGTCTTTTTCAGGGGACGGCCTACCCGCCGAAGCAACAGTTGTAGGTATGTTCA  
CAAAGGGTTATAGAGCGGTAACCTCAGTAATGATCCCTCCGCTGGTTCACCAACGGAGACCTT  
GTTACGACTTCTCC

>BSNB\_0655\_Colletotrichum\_gloeosporioides

CTACCTGATCCGAGGTCAACCTTTGGAAAATTGGGGGGTTTTACGGCAAGAGTCCCTCCGGA  
TCCAGTGCGAGACGTAAAGTTACTACGCAAAGGAGGCTCCGGGAGGGTCCGCCACTACCT  
TTGAGGGCCTACATCAGCTGTAGGGCCCCAACACCAAGCAGAGCTTGAGGGTTGAAATGAC  
GCTCGAACAGGCATGCCCCGCCAGAATGCTGGCGGGCGCAATGTGCGTTCAAAGATTTCGATG  
ATTCATGAATTCTGCAATTCACATTACTTATCGCATTTTCGCTGCGTTCTTCATCGATGCCAG  
AACCAAGAGATCCGTTGTATAAAGTTTTGATTATTTGCTTGTACCACTCAGAAGAAACGTCG  
TTAAATCAGAGTTTGGTTATCCTCCGGCGGGCGCCGACCCGCCCCGAGGCGGGAGGCCGGG  
AGGGTCGCGGAGACCCTACCCGCCGAAGCAACAGTTATAGGTATGTTACAAAGGGTTATA  
GAGCGTAAACTCAGTAATGATCCCTCCGCTGGTTCACCAACGGAGACCTTGTTACGACTTCT  
CC

>BSNB\_0660\_Thanatephorus\_cucumeris

AGTTCAGAAATTTTGTCCGAAGACGTTAGAAGCGCGAACACTAGAATACCTCCACAGCAA  
CGCAGATAATTATCACGCTGAAGCGGCTGGTAACGTTTCGCACTAATGCATTTTCAGAGGAGCC  
GACTACGAGAGCCGGCACGACCTCCAAGTCCAAGCCTTCGTCAATAAAGCCGAAGGTTGAG  
AATTCCATGAGACTCAAACAGGCATGCTCCTCGGAATACCAAGGAGCGCAAGGTGCGTTCA  
AAGATTCGATGATTCATGAATTCTGCAATTCACATTACTTATCGCATTTTCGCTGCGTTCTTCA

TCGATGCGAGAGCCAAGAGATCCGTTGCTGAAAGTTGTATATAAATTGCGTTATAGCAAAGT  
ATGACATTCTAAAACTGAATCGTTTGTAGTAAAGCATAAGCCCGACACCTACAAGTGCGCG  
AACGCACCCACAAGCCGGCCTATGAAAAGTGACAGAAAGTTGAGAGTGGATGAGACAGGC  
GTGCACATGCCCTTGCGAGCCAGCAGACAACCCGTTCAAAACTCGATAATGATCCTTCCGCA  
GGTTCACCTACGGAAACCTTGTTACGAACCTTCTCCT

>BSNB\_0662\_Colletotrichum\_gloeosporioides

CTGATCCGAGGTCAACCTTTGGAAAATTGGGGGGTTTTACGGCAAGAGTCCCTCCGGATCCC  
AGTGCGAGACGTAAAGTTACTACGCAAAGGAGGCTCCGGGAGGGTCCGCCACTACCTTTGA  
GGGCCTACATCAGCTGTAGGGCCCCAACACCAAGCAGAGCTTGAGGGTTGAAATGACGCTC  
GAACAGGCATGCCCGCCAGAATGCTGGCGGGGCGCAATGTGCGTTCAAAGATTTCGATGATTC  
ACTGAATTCTGCAATTCACATTACTTATCGCATTTTCGCTGCGTTCTTCATCGATGCCAGAACC  
AAGAGATCCGTTGTAAAGTTTTGATTATTTGCTTGTACCACTCAGAAGAAACGTCGTTAA  
ATCAGAGTTTGGTTATCCTCCGGCGGGCGCCGACCCGCCCGGGGGGGCGGGAGGCCGGGAG  
GGTCACGGGGACCCTACCCGCCGAAGCAACAGTTGTAGGTATGTTACAAAGGGTTGTAGA  
GCGTAAACTCAGTAATGATCCCTCCGCTGGTTCACCAACGGAGACCTTGTTA

>BSNB\_0664\_Acutodesmus\_obliquus

CCTGAGCTCAGGTCGAAAGTTTAAGACATGCAAAGCATGTTTCCTGCTTGGCCTCTAGCAAA  
GTCCACAAGCCACAACCTTCGTGTAGTCGGCAGAAGCCGGTGCTACCTATCCAGTTGAAGCCC  
ATATCGGGTCCTTGCTTAAGCCTCTAAGCTTCAGCCAACCCAATCGGAGTGAACCAATTGGG  
AAAGCCAGATCCACCCCTAAGGCCAACTAGAAGCTGACCAGCCCTCCAAAAGGAGAGAGG  
GGTGAGGGTATAAACCGACGCTGAGGCAGACATGCTCTTGCCCGAGGGCTCGAGCGCAATA  
TGCGTTCAAAGATTTCGATGGTTCACGGAATTCTGCAATTCACACTACGTATCGCATTTTCGCTG  
CGTTCTTCATCGTTGCGAGAGCCAAGATATCCGTTGTTGAGAGTTGTCTTTGGTTAAGATTGC  
CAGTTAATAGCAATCAAAGCTTCAGAGTTTGGTTTTGACAGTGGTTAGCACTGGTGTATAAG  
CATGCCAAAGCGCCACTGATGCAAGTAATCAAATTACTCGCACCAGCTTGCAAGTACAATT  
GGGCAAGCCAATTGCCTTGCTGGCAGCTAAGGCACGGAACAGATAGGTTTCGCATTGTGGTTT  
TAATAATTCAATGATCCTTCCGCAGGTTACCTACGGAAACCTTGTTACG

>BSNB\_0666\_Nodulisporium\_sp

ATCCGAGGTCAACCACTAGAAAATAGGGGGTTTTACGGCTAGCAGCCAGGGCCACCACACA  
AGCGAGAGAGATTACTACGCTGAGAGTGTACCCTAACTCCGCCACTGATTTTCAGGAACCTAC  
GCCGAAGCCGTAGACTCCCAACACTAAGCAACAGGGCTTAAGGGTTGAAATGACGCTCGAA  
TAGGCATGCCCACTAGAATACTAATGGGCGCAATGTGCGTTCAAAGATTTCGATGATTCAGTG  
AATTCTGCAATTCACATTACTTATCGCATTTTCGCTGCGTTCTTCATCGATGCCAGAACCAAGA  
GATCCGTTGTTGAAAGTTTTAACTTATTTAGTTAAGTACTCAGAGATACAGCTGTAAAAAC  
AAGAGTTTAATGGTCCTGCGGCGGGCCTTCACGCGGCTACAGGGTAGCTCCAGGGTAGACA  
CCTACAGGGTAGGTGTCTCCAGGGTAGCTACAGGGTAACCGCAGCACGCGCCGAGGAAACG  
ACGGTAAGGTTACAAAGGGTTTTGGAGTTTGGAAACTCATTAATGATCCCTCCGCTGGTTC  
ACCAACGGAGACC

>BSNB\_0668\_Cladosporium\_herbarum

AGGAGAAGTCGTAACAAGGTCTCCGTAGGTGAACCTGCGGAGGGATCATTATAAGTTCACC  
CAGGCTTGACAGCTGGGGACTGACAACCCTTTGATTTCCGACTCTGTTGCCTCCGGGGCGA  
CCCTGCCTTCGGGCGGGGGCTCCGGGTGGACACTTCAAACCTTTGCGTAACCTTTGCAGTCTG  
AGTAAACTTAATTAATAAATTAACAACTTTTAAACACGGATCTCTTGGTTCTGGCATCGATGA  
AGAACGCAGCGAAATGCGATAAGTAATGTGAATTGCAGAATTCAGTGAATCATCGAATCTT

TGAACGCACATTGCGCCCCCTGGTATTCCGGGGGGCATGCCTGTTTCGAGCGTCATTTACCA  
CTCAAGCCTCGTTGGTATTGGGCAACGCGGTCCGCCGCGTGCCTCAAATCGTCCGGCTGGG  
TCTTCTGTCCCCTAAGCGTTGTGGAA

>BSNB\_0678\_Fusarium\_lateritium

AGGAGAAGTCGTAACAAGGTCTCCGTTGGTGAACCAGCGGAGGGATCATTACCGAGTTTAC  
AACTCCCAAACCCCTGTGAACATACCTTAATGTTGCCTCGGCGGATCAGCCCCGCGCCCCGTA  
AAACGGGACGGCCCCGCCAGAGGACCCAACTCTAATGTTTCTTATTGTAACCTTCTGAGTAAA  
ACAAACAAATAAATCAAACTTTCAACAACGGATCTCTTGGTTCTGGCATCGATGAAGAAC  
GCAGCAAAATGCGATAAGTAATGTGAATTGCAGAATTCAGTGAATCATCGAATCTTTGAAC  
GCACATTGCGCCCCGTGGTATTCCGGCGGGCATGCCTGTTTCGAGCGTCATTTCAACCCTCAA  
GCCCTCGGGTTTGGTGTGGGGATCGGCTCTGCCTTCTGGCGGTGCCGCCCCCGAAATACATT  
GGCGGTCTCGCTGCAGCCTCCATTGCGTAGTAGCTAACACCTCGCAACTGGAACGCGGCGC  
GGCCATGCCGTA AAAACCCCAACTTCTGAATGTTGACCTCGGATCAGGTAG

>BSNB\_0679\_Diaporthe\_sp

AGGAGAAGTCGTAACAAGGTCTCCGTTGGTGAACCAGCGGAGGGATCATTGCTGGAACGCG  
CTTCGGCGCACCCAGAAACCCCTTTGTGAACCTTATACCTCACTGTTGCCTCGGCGCAGGCCGG  
CCCCTCCCACGGGGCCCCCTCCGGAAGGAGGAGCAGCCCGCCGGCGGCCAACTAAACTCTTG  
TTTCTTAGTGATCTCTGAGTAAAAAACATAAATGAATCAAACTTTCAACAACGGATCTCT  
TGGTTCTGGCATCGATGAAGAACGCAGCGAAATGCGATAAGTAATGTGAATTGCAGAATTC  
AGTGAATCATCGAATCTTTGAACGCACATTGCGCCCTCTGGTATTCCGGAGGGCATGCCTGT  
TCGAGCGTCATTTCAACCCTCAAGCACTGCTTGGTGTGGGGCACCGCCTGTGAAAGGGCGG  
GCCCTGAAATCTAGTGGCGAGCTCGCCAGGACCCCGAGCGTAGTAGTTTATATCTCGTTCTG  
GAAGGCCCTGGCGGTGCACTGCCGTTAAACCCCAACTTCTGAAATTTGACCTCGGA

>BSNB\_0680\_Endomelanconiopsis\_endophytica

TACCTGATCCGAGGTCAACCTTGAGAAAATTCAGAAGGTTTCGTCCGGCGAGCGAACGTCCC  
GTCCTCCAAAGCGAGGTGTTTTCTACTACGCTTGAGGCAAGACGCCACCGCCGAGGTCTTTG  
AGGCGCGTCCGGTGAAGGACGGCGCCCAATACCAAGCAGAGCTTGAGTGGTGAAATGACG  
CTCGAACAGGCATGCCCCTCGGAATACCAAGGGGCGCAATGTGCGTTCAAAGATTCGATGA  
TTCACTGAATTCTGCAATTCACATTACTTATCGCATTTTCGTGCGTTCTTCATCGATGCCAGA  
ACCAAGAGATCCGTTGTTGAAAGTTTTAGTTTATTAACTTTTGATCAGACAGCTACGTTTAC  
TGACTGGAGTTTGGTAGTCTCTGGCGGGCGCTGGCCAGCCCCGGTTAGGGGGCCGGCCGCG  
GAGGACCGCGGCCCGCCAAAGCAACAGAGGTAGATACATAGGGTGTGAGAGAAGAGGT  
CCGGAGACCCCTAGAACTCGGTAATGATCCTTCCGCAGGTTACCTACGGAAACCTTGTTAC  
GAACTTCTCC

>BSNB\_0681\_Endomelanconiopsis\_endophytica

TACCTGATCCGAGGTCAACCTTGAGAAAATTCAGAAGGTTTCGTCCGGCGAGCGAACGTCCC  
GTCCTCCAAAGCGAGGTGTTTTCTACTACGCTTGAGGCAAGACGCCACCGCCGAGGTCTTTG  
AGGCGCGTCCGGTGAAGGACGGCGCCCAATACCAAGCAGAGCTTGAGTGGTGAAATGACG  
CTCGAACAGGCATGCCCCTCGGAATACCAAGGGGCGCAATGTGCGTTCAAAGATTCGATGA  
TTCACTGAATTCTGCAATTCACATTACTTATCGCATTTTCGTGCGTTCTTCATCGATGCCAGA  
ACCAAGAGATCCGTTGTTGAAAGTTTTAGTTTATTAACTTTTGATCAGACAGCTACGTTTAC  
TGACTGGAGTTTGGTAGTCTCTGGCGGGCGCTGGCCAGCCCCGGTTAGGGGGCCGGCCGCG  
GAGGACCGCGGCCCGCCAAAGCAACAGAGGTAGATACATAGGGTGTGAGAGAAGAGGT  
CCGGAGACCCCTAGAACTCGGTAATGATCCTTCCGCAGGTTACCTACGGAAACCTTGTTAC  
GAACTTCTCC

CCGGAGACCCCTAGAACTCGGTAATGATCCTTCCGCAGGTTACCTAGGGAAACCTTGTTAC  
GAACTTCTCC

>BSNB\_0682\_Colletotrichum\_siamense

GTCAACCTTTGGAAAATTGGGGGTTTACGGCTAGAGTCCCTCCGGATCCCAGTGCGAGACG  
TAAAGTTACTACGCAAAGGAGGCTCCGGGAGGGTCCGCCACTACCTTTGAGGGCCTACATC  
AGCTGTAGGGCCCCAACACCAAGCAGAGCTTGAGGGTTGAAATGACGCTCGAACAGGCATG  
CCCGCCAGAATGCTGGCGGGCGCAATGTGCGTTCAAAGATTGATGATTCACTGAATTCTGC  
AATTCACATTACTTATCGCATTTTCGCTGCGTTCTTCATCGATGCCAGAACCAAGAGATCCGTT  
GTAAAAGTTTGTATTATTTGCTTGTACCACTCAGAAGAAACGTCGTTAAATCAGAGTTTGGT  
TATCTCCGGCGGGCGCCGACCCGCCCCGGGGCGGGAGGCCGGGAGGGTTCGCGGAGACCC  
TACCCGCCGAAGCAACAGTTATAGGTATGTTACAAAGGGTTATAGAGCGTAAACTCAGTA  
ATGATCCCTCCGCTGGTTAACCAACGGAGACCTTGTTA

>BSNB\_0684\_Endomelanconiopsis\_endophytica

ACCTGATCCGAGGTCAACCTTGAGAAAATTCAGAAGGTTTCGTCCGGCGAGCGAACGTCCCG  
TCCTCCAAAGCGAGGTGTTTTCTACTACGCTTGAGGCAAGACGCCACCGCCGAGGTCTTTGA  
GGCGCGTCCGGTGAAGGACGGCGCCCAATACCAAGCAGAGCTTGAGTGGTGAATGACGCT  
CGAACAGGCATGCCCCTCGGAATACCAAGGGGCGCAATGTGCGTTCAAAGATTGATGATT  
CACTGAATTCTGCAATTCACATTACTTATCGCATTTTCGCTGCGTTCTTCATCGATGCCAGAAC  
CAAGAGATCCGTTGTTGAAAGTTTTAGTTTATTAAGTTTATGATCAGACAGCTACGTTTACTG  
ACTGGAGTTTGGTAGTCCTCTGGCGGGCGCTGGCCAGCCCCGGTTAGGGGGCCCGCCGCGG  
AGGACCGCGGCCCCGCCAAAGCAACAGAGGTAGGTACACATAGGGTGTGAGAGAAGAGGTC  
CGAAGACCCCTAGAACTCGGTAATGATCCTTCCGCAGGTTACCTACGGAAACCTTGTTACG  
AACTTCTCCT

>BSNB\_0686\_Fusarium\_avenaceum

AGTACTACGCAATGGAGGCTGCAGCGAGACCGCCAATGTATTTCCGGGGCGGCACCGCCA  
GAAGGCAGAGCCGATCCCCAACACCAAACCCGAGGGCTTGAGGGTTGAAATGACGCTCGA  
ACAGGCATGCCCCCGGAATACCAGCGGGCGCAATGTGCGTTCAAAGATTGATGATTAC  
TGAATTCTGCAATTCACATTACTTATCGCATTTTGTGCGTTCTTCATCGATGCCAGAACCA  
GAGATCCGTTGTTGAAAGTTTTGATTTATTTGTTTGTCTTACTCAGAAGTTACAATAAGAAAC  
ATTAGAGTTTGGGTCTCTGGCGGGCCGTCCCGTTTTACGGGGCGCGGGCTGATCCGCCGAG  
GCAACATTAAGGTATGTTACAGGGGTTTGGGAGTTGTAAACTCGGTAATGATCCCTCCGCT  
GGTTCACCAACGGAGACCTTGTTACGACTTCTCC

>BSNB\_0687\_Diaporthe\_sp

TGATCCGAGGTCAAATTTCAGAAGTTGGGGGTTTAACGGCAGGGCGCCGCCAGGGCCTTCC  
AGAACGAGATGTAATACTACTACGCTCGGGGTCTTAGCGAGCTCGCCACTAGATTTAGGGCC  
TGCTTTGTCTCCAAAGCAGTGCCCCAACACCAAGCCAGGCTTGAGGGTTGAAATGACGCTCG  
AACAGGCATGCCCTCCGGAATACCAGAGGGCGCAATGTGCGTTCAAAGATTGATGATTCA  
CTGAATTCTGCAATTCACATTACTTATCGCATTTTCGCTGCGTTCTTCATCGATGCCAGAACCA  
AGAGATCCGTTGTTGAAAGTTTTGATTCATTTATGTTTTTACTCAGAGATTCACTAAGAAAC  
AAGAGTTTGGTTGGCCGCCGGCGGGCTGCTCCCCGTTTCCGGGGGGCCTCAGAAGAGGCCG  
GCCTTCGCCGAGGCAACAATAAGGTATAAGTTCACAAAGGGTTTCTGGGTGCGCCGGGGCG  
CGTTCCAGCAATGATCCCTCCGCTGGTTCACCAACGGAGACCTTGTTACG

>BSNB\_0688\_Colletotrichum\_gloeosporioides

CTGATCCGAGGTCAACCTTTGGAAAATTGGGGGGTTTTACGGCAAGAGTCCCTCCGGATCCC  
AGTGCGAGACGTAAAGTTACTACGCAAAGGAGGCTCCGGGAGGGTCCGCCACTACCTTTGA  
GGGCTACATCAGCTGTAGGGCCCCAACACCAAGCAGAGCTTGAGGGTTGAAATGACGCTC  
GAACAGGCATGCCCGCCAGAATGCTGGCGGGCGCAATGTGCGTTCAAAGATTCGATGATTC  
ACTGAATTCTGCAATTCACATTACTTATCGCATTTTCGCTGCGTTCTTCATCGATGCCAGAACC  
AAGAGATCCGTTGTTAAAAGTTTTGATTATTTGCTTGTACCACTCAGAAGAAACGTCGTAA  
ATCAGAGTTTGGTTATCCTCCGGCGGGCGCCGACCCGCCCCGGGGGGCGGGAGGCCGGGAG  
GGTCACGGGGACCCTACCCGCCGAAGCAACAGTTGTAGGTATGTTTACAAAGGGTTGTAGA  
GCGTAAACTCAGTAATGATCCCTCCGCTGGTTCACCAACGGAGACCTTGTTA

>BSNB\_0691\_Penicillium\_verrucosum

ACAAAGCCCCATACGCTCGAGGACCGGACGCGGTGCCGCCGCTGCCTTTCTGGGCCCCGTCCC  
CCGGAATCGGAGGACGGGGCCCCAACACACAAGCCGGGCTTGAGGGCAGCAATGACGCTCG  
GACAGGCATGCCCCCGGAATACCAGGGGGCGCAATGTGCGTTCAAAGACTCGATGATTCA  
CTGAATTTGCAATTCACATTACGTATCGCATTTTCGCTGCGTTCTTCATCGATGCCGGAACCAA  
GAGATCCGTTGTTGAAAGTTTTAAATAATTTATATTTTCACTCAGACTTCAATCTTCAGACAG  
AGTTCGAGGGTGTCTTCGGCGGGCGCGGGCCCCGGGGCGTGAGCCCCCGGCGGCCAGTAA  
AGGCGGGCCCCGCCGAAGCAACAAGGTAAAATAAACACGGGTGGGAGGTTGGACCCAGAGG  
GCCCTCACTCGGTAATGATCCTTCCGCAGGTTACCTACGGAAACCTTGTTACGACTTCTCC

>BSNB\_0692\_Endomelanconiopsis\_endophytica

TACCTGATCCGAGGTCAACCTTGAGAAAATTCAGAAGGTTTCGTCCGGCGAGCGAACGTCCC  
GTCCTCCAAAGCGAGGTGTTTTCTACTACGCTTGAGGCAAGACGCCACCGCCGAGGTCTTTG  
AGGCGCGTCCGGTGAAGGACGGCGCCCAATACCAAGCAGAGCTTGAGTGGTGAAATGACG  
CTCGAACAGGCATGCCCCTCGGAATACCAAGGGGCGCAATGTGCGTTCAAAGATTCGATGA  
TTCACTGAATTCTGCAATTCACATTACTTATCGCATTTTCGCTGCGTTCTTCATCGATGCCAGA  
ACCAAGAGATCCGTTGTTGAAAGTTTTAGTTTATTAACTTTTGATCAGACAGCTACGTTTAC  
TGACTGGAGTTTGGTAGTCCTCTGGCGGGCGCTGGCCAGCCCCGGTTAGGGGGCCGGCCGCG  
GAGGACCGCGGCCCGCCAAAGCAACAGAGGTAGATACATAGGGTGTGAGAGAAGAGGT  
CCGGAGACCCCTAGAACTCGGTAATGATCCTTCCGCAGGTTACCTACGGAAACCTTGTTAC  
GAACTTCTCC

>BSNB\_0693\_Endomelanconiopsis\_endophytica

TACCTGATCCGAGGTCAACCTTGAGAAAATTCAGAAGGTTTCGTCCGGCGAGCGAACGTCCC  
GTCCTCCAAAGCGAGGTGTTTTCTACTACGCTTGAGGCAAGACGCCACCGCCGAGGTCTTTG  
AGGCGCGTCCGGTGAAGGACGGCGCCCAATACCAAGCAGAGCTTGAGTGGTGAAATGACG  
CTCGAACAGGCATGCCCCTCGGAATACCAAGGGGCGCAATGTGCGTTCAAAGATTCGATGA  
TTCACTGAATTCTGCAATTCACATTACTTATCGCATTTTCGCTGCGTTCTTCATCGATGCCAGA  
ACCAAGAGATCCGTTGTTGAAAGTTTTAGTTTATTAACTTTTGATCAGACAGCTACGTTTAC  
TGACTGGAGTTTGGTAGTCCTCTGGCGGGCGCTGGCCAGCCCCGGTTAGGGGGCCGGCCGCG  
GAGGACCGCGGCCCGCCAAAGCAACAGAGGTAGATACATAGGGTGTGAGAGAAGAGGT  
CCGGAGACCCCTAGAACTCGGTAATGATCCTTCCGCAGGTTACCTACGGAAACCTTGTTAC  
GAACTTCTCC

>BSNB\_0694\_Colletotrichum\_theobromicola

CTGATCCGAGGTCAACCTTTGGAAAATTGGGGGGTTTTACGGCAAGAGTCCCTCCGGATCCC

AGTGCAGACGTAAAGTTACTACGCAAAGGAGGCTCCGGGAGGGTCCGCCACTACCTTTGA  
GGGCCTACATCAGCTGTAGGGCCCCAACACCAAGCAGAGCTTGAGGGTTGAAATGACGCTC  
GAACAGGCATGCCCCGCCAGAATGCTGGCGGGCGCAATGTGCGTTCAAAGATTTCGATGATT  
ACTGAATTCTGCAATTCACATTACTTATCGCATTTCGCTGCGTTCTTCATCGATGCCAGAACC  
AAGAGATCCGTTGTAAAGTTTTGATTATTTGCTTGTACCACTCAGAAGAAACGTCGTAA  
ATCAGAGTTTGGTTATCCTCCGGCGGGCGCCGACCCGCCCCGGGGGGCGGGAGGCCGGGAG  
GGTCACGGGGACCCTACCCGCCGAAGCAACAGTTGTAGGTATGTTACAAAGGGTTGTAGA  
CGGTAAACTCAGTAATGATCCCTCCGCTGGTTCACCAACGGAGACCTTGTTA

>BSNB\_0695\_Colletotrichum\_theobromicola

TGATCCGAGGTCAACCTTTGGAAAATTGGGGGGTTTTACGGCAAGAGTCCCTCCGGATCCCA  
GTGCGAGACGTAAAGTTACTACGCAAAGGAGGCTCCGGGAGGGTCCGCCACTACCTTTGAG  
GGCCTACATCAGCTGTAGGGCCCCAACACCAAGCAGAGCTTGAGGGTTGAAATGACGCTCG  
AACAGGCATGCCCCGCCAGAATGCTGGCGGGCGCAATGTGCGTTCAAAGATTTCGATGATTCA  
CTGAATTCTGCAATTCACATTACTTATCGCATTTCGCTGCGTTCTTCATCGATGCCAGAACCA  
AGAGATCCGTTGTAAAGTTTTAATTATTTGCTTGTACCACTCAGAAGAAACGTCGTAAAT  
CAGAGTTTGGTTATCCTCCGGCGGGCGCCGACCCGCCCCGGGGGGCGGGAGGCCGGGAGGG  
TCACGGGGACCCTACCCGCCGAAGCAACAGTTGTAGGTATGTTACAAAGGGTTGTAGAGC  
GTAAACTCAGTAATGATCCCTCCGCTGGTTCACCAACGGAGACC

>BSNB\_0696\_Colletotrichum\_gloeosporioides

GGAGAAGTCGTAACAAGGTCTCCGTTGGTGAACCAGCGGAGGGATCATTACTGAGTTTACG  
CTCTATAACCCTTTGTGAACATACCTATAACTGTTGCTTCGGCGGGTAGGGTCTCCGCGACCC  
TCCCGGCCTCCCGCCTCCGGGCGGGTCCGGCGCCCGCCGGAGGATAACCAAACCTCTGATTTAA  
CGACGTTTCTTCTGAGTGGTACAAGCAAATAATCAAACTTTTAACAACGGATCTCTTGTTTC  
TGGCATCGATGAAGAACGCAGCGAAATGCGATAAGTAATGTGAATTGCAGAATTCAGTGAA  
TCATCGAATCTTTGAACGCACATTGCGCCCGCCAGCATTCTGGCGGGCATGCCTGTTTCGAGC  
GTCATTTCACCCCTCAAGCTCTGCTTGGTGTGGGGCCCTACAGCTGATGTAGGCCCTCAA  
GGTAGTGGCGGACCCTCCCGGAGCCTCCTTTGCGTAGTAACCTTACGTCTCGCACTGGGATC  
CGGAGGGACTCTTGCCGTAAACCCCCCAATTTCCAAAGGTTGACCTCGGATCAGGTAG

>BSNB\_0699\_Colletotrichum\_theobromicola

CTGATCCGAGGTCAACCTTTGGAAAATTGGGGGGTTTTACGGCAAGAGTCCCTCCGGATCCC  
AGTGCAGACGTAAAGTTACTACGCAAAGGAGGCTCCGGGAGGGTCCGCCACTACCTTTGA  
GGGCCTACATCAGCTGTAGGGCCCCAACACCAAGCAGAGCTTGAGGGTTGAAATGACGCTC  
GAACAGGCATGCCCCGCCAGAATGCTGGCGGGCGCAATGTGCGTTCAAAGATTTCGATGATT  
ACTGAATTCTGCAATTCACATTACTTATCGCATTTCGCTGCGTTCTTCATCGATGCCAGAACC  
AAGAGATCCGTTGTAAAGTTTTGATTATTTGCTTGTACCACTCAGAAGAAACGTCGTAA  
ATCAGAGTTTGGTTATCCTCCGGCGGGCGCCGACCCGCCCCGGGGGGCGGGAGGCCGGGAG  
GGTCACGGGGACCCTACCCGCCGAAGCAACAGTTGTAGGTATGTTACAAAGGGTTGTAGA  
CGGTAAACTCAGTAATGATCCCTCCGCTGGTTCACCAACGGAGACCTTGTTA

>BSNB\_0700\_Apioclypea\_sp

CCTGATCCGAGGTCAACCCAGTAAAAAAGTTGGGGGGTTTAGCGGCGAGGGCCACGGCACCT  
ACAGAAGCGAGAGGTATATTACTGCGCTCAGAGGTAGAACCGTCACTCCGCCCGGTGAATTT  
GAGGAGCTACAGGGTAACAGCTACAGGGTAGCTCCCGGGTAGTCTCCCAACGCCAAGACTA  
GGTCTTGAGTGGTACTAATGACGCTCGAACAGGCATGCCCTCCAGAATGCTGGGGGGCGCA  
ATGTGCGTTCAAAGATTTCGATGATTCACTGAATTCTGCAATTCACATTACTTATCGCATTTCG

CTGCGTTCTTCATCGATGCCAGAACCAAGAGATCCGTTGTTAAAGGTTTTGACTTATTTTCAT  
AAGACTCTCAGATGATAATAATACAAATAGTTTGGTTTTCCACCGGCGGTCCGCCCGCTACA  
GGGTAAGCTGCAGGGTAAGACCGCCGAGGCAACGTAAGGTATAGGTTACAAAATGGTTTAT  
ACAGGAGTGTTTTAATACTCTGTAATGATCCCTCCGCTGGTTCACCAACGGAGACCTTGTTAC  
GAACTTCTCCT

>BSNB\_0701\_Colletotrichum\_gloeosporioides

CTGATCCGAGGTCAACCTTTGGAAAATTGGGGGGTTTTACGGCAAGAGTCCCTCCGGATCCC  
AGTGCGAGACGAAATGTTACTACGCAAAGGAGGCTCCGGGAGGGTCCGCCACTACCTTTGA  
GGGCCTACGTCGACCGTAGAGCCCCAACACCAAGCAGAGCTTGAGGGTTGAAATGACGCTC  
GAACAGGCATGCCCGCCAGAATGCTGGCGGGCGCAATGTGCGTTCAAAGATTTCGATGATTC  
ACTGAATTCTGCAATTCACATTACTTATCGCATTTTCGCTGCGTTCTTCATCGATGCCAGAACC  
AAGAGATCCGTTGTTAAAAGTTTTGATTATTTTGCTTATGCCACTCAGAAGAAACGTCGTTAC  
AATAGAGTTTGGTTATCCTCCGGCGGGCGCCGGGTCCGGTCCCGCGGGGGGTCCGGTCCGGG  
CCGGGAGGCGTCTTTTCAGGGGACGGCCTACCCGCCGAAGCAACAGTTGTAGGTATGTTCA  
CAAAGGGTTATAGAGCGGTAACCTCAGTAATGATCCCTCCGCTGGTTCACCAACGGAGACCTT  
GTTACGACTTCTCC

>BSNB\_0702\_Fusarium\_lateritium

AGGAGAAGTCGTAACAAGGTCTCCGTTGGTGAACCAGCGGAGGGATCATTACCGAGTTTAC  
AACTCCCAAACCCCTGTGAACATACCTTAATGTTGCCTCGGCGGATCAGCCCGCGCCCCGTA  
AAACGGGACGGCCCGCCAGAGGACCCAACTCTAATGTTTCTTATTGTAACCTTCTGAGTAAA  
ACAAACAAATAAATCAAAACTTTCAACAACGGATCTCTTGGTTCTGGCATCGATGAAGAAC  
GCAGCAAAATGCGATAAGTAATGTGAATTGCAGAATTCAGTGAATCATCGAATCTTTGAAC  
GCACATTGCGCCCGCTGGTATTCCGGCGGGCATGCCTGTTGAGCGTCATTTCAACCCTCAA  
GCCCTCGGGTTTGGTGTGGGGATCGGCTCTGCCTTCTGGCGGTGCCGCCCCCGAAATACATT  
GGCGGTCTCGCTGCAGCCTCCATTGCGTAGTAGCTAACACCTCGCAACTGGAACGCGGCGC  
GGCCATGCCGTAAAACCCCAACTTCTGAATGTTGACCTCGGATCAGGTAG

>BSNB\_0703\_Colletotrichum\_theobromicola

CTGATCCGAGGTCAACCTTTGGAAAATTGGGGGGTTTTACGGCAAGAGTCCCTCCGGATCCC  
AGTGCGAGACGTAAAGTTACTACGCAAAGGAGGCTCCGGGAGGGTCCGCCACTACCTTTGA  
GGGCCTACATCAGCTGTAGGGCCCCAACACCAAGCAGAGCTTGAGGGTTGAAATGACGCTC  
GAACAGGCATGCCCGCCAGAATGCTGGCGGGCGCAATGTGCGTTCAAAGATTTCGATGATTC  
ACTGAATTCTGCAATTCACATTACTTATCGCATTTTCGCTGCGTTCTTCATCGATGCCAGAACC  
AAGAGATCCGTTGTTAAAAGTTTTGATTATTTGCTTGTACCACTCAGAAGAAACGTCGTTAA  
ATCAGAGTTTGGTTATCCTCCGGCGGGCGCCGACCCGCCCGGGGGGGCGGGAGGCCGGGAG  
GGTCACGGGGACCCTACCCGCCGAAGCAACAGTTGTAGGTATGTTACAAAGGGTTGTAGA  
GCGTAAACTCAGTAATGATCCCTCCGCTGGTTCACCAACGGAGACCTTGTTA

>BSNB\_0707\_Fusarium\_lateritium

AGGAGAAGTCGTAACAAGGTCTCCGTTGGTGAACCAGCGGAGGGATCATTACCGAGTTTAC  
AACTCCCAAACCCCTGTGAACATACCTTAATGTTGCCTCGGCGGATCAGCCCGCGCCCCGTA  
AAACGGGACGGCCCGCCAGAGGACCCAACTCTAATGTTTCTTATTGTAACCTTCTGAGTAAA  
ACAAACAAATAAATCAAAACTTTCAACAACGGATCTCTTGGTTCTGGCATCGATGAAGAAC  
GCAGCAAAATGCGATAAGTAATGTGAATTGCAGAATTCAGTGAATCATCGAATCTTTGAAC  
GCACATTGCGCCCGCTGGTATTCCGGCGGGCATGCCTGTTGAGCGTCATTTCAACCCTCAA  
GCCCTCGGGTTTGGTGTGGGGATCGGCTCTGCCTTCTGGCGGTGCCGCCCCCGAAATACATT

GGCGGTCTCGCTGCAGCCTCCATTGCGTAGTAGCTAACACCTCGCAACTGGAACGCGGCGC  
GGCCATGCCGTAAAACCCCAACTTCTGAATGTTGACCTCGGATCAGGTAG

>BSNB\_0717\_Harknessia\_australiensis

CCTGATCCGAGGTCAATTTTCAGAAGTTGGGGGGTTTTACGGCCGGGACACCGCTAATCCTT  
CCAAAGCGAGGTGAGAAAAAACTACTACGCTCAGAGTCTTAGCGAGCCCCGCCACTGAATTT  
CAGGGCCTACCGTGTAACGGGTAGTGCCCCAACACCAAGCCAGGCTTGAGGGTTGAAATGA  
CGCTCGAACAGGCATGCCCGCTGGAATTCCAGCGGGCGCAATGTGCGTTCAAAGATTGAT  
GATTCATGAATTCTGCAATTCACATTACTTATCGCATTTTCGCTGCGTTCTTCATCGATGCCA  
GAACCAAGAGATCCGTTGTTGAAAGTTTTGATTCATTTGTAAAAAATGAGACTCAGAAGAG  
ATACGTTATAAAAAACAAAGAGTTTAGTGGGCCGCGCGGGCCTGCTCCGGACGCGACCGA  
GAAAGGACACGACCGGCAGGGGGCGCGAGGGGCCCCCGAGCTCGACGCCGAGGCAACGAT  
GTGTGGGTATAAGTTCACAAAGGGTGTCTGGGAGTGCGCCCGCGAGGGACGCAGTTCCAAC  
AATGATCCCTCCGCTGGTTCACCAACGGAGACCTTGTTACGAACCTTCTCC

>BSNB\_0718\_Xylaria\_sp

GATCCGAGGTCAACCTTTAAAAAGTAGGGGTTTTACGGCAGGGGACCGGTCCAATAATAG  
GCGAGATAAAATCTACTACGTCTAGAGTGTGAACCGACTCCGCCACTAACTTTGAGGGGCT  
ACAGTGCTGTAGGCCCCCCAACACTAAGCAACAGAGGCTTAAGGGTTGAAATGACGCTCGAA  
CAGGCATGCCCACTAGAATACTAATGGGCGCAATGTGCGTTCAAAGATTGATGATTCATG  
AATTCTGCAATTCACATTACTTATCGCATTTTCGCTGCGTTCTTCATCGATGCCAGAACCAAGA  
GATCCGTTGTTGAAAGTTTTAACTTATTTAGTTATACTGTCAGAATTCAATAATAAACAGAGT  
TTCGTGGGCCCGCGGCAGGTCATCGTTCCCTGCAAGGGTATTATTATGCAGTAAGGCTGTAA  
CACTCGCATAGGAGGGTACGTTTATAAAGCTTTTATCCCCTATAGAAACCGATGCTGGTGTC  
TATCGAGTAGCACTACTGAGCAGGCGTCCTCGGTCCCCGCAAGGGTATTATGCAGTAAAGTT  
GTAACACTCGCATAGGAGGTACGGTCTTAAAGCTTTTCTCCTTACAAGGGGATTATGCAGTC  
AGCTGTAACACTCGCATCGGAGGTACGTTTCGTAAAGCATTATCCCCTATTGGAACCGAGTAG  
CACTACTGAGCAGACGTCCTCGGTCCCCGCAAGGGTATTATGCAGTAAAGTTGTAACACTCG  
CATAGGAGGTACGGTCTTAAAGCTTTTCTCCTCACAAGGGGATTATGCAGTCAGTTGTAACA  
CTCGCATAGGAGGGTACGTTTCGTAAAGCATTATCCCCTATTGGAACCGAAGGTCCTACAGGG  
TAGGGCACTACTGCGCAGGCGTGACCTGCCGAGGC

>BSNB\_0720\_Oxydothis\_sp

GGTGTTTTACGGCAGGGGCGCGCGCCTCACAGAGCGAAAAAGAGAACTTACTACGCTCA  
GAGGACACACACGTTCCCGCCACTGGATTTGGGGAACCGCGGGGCAGCCCGCGGATTCCCA  
ACACTAAGCTGTGCTTAAGGGTTGAAATGACGCTCGAACAGGCATGCCCGCCAGAATGCTG  
ACGGGCGCAATGTGCGTTCAAAGATTGATGATTCATGAATTCTGCAATTCACATTACTTAT  
CGCATTTTCGCTGCGTTCTTCATCGATGCCAGAACCAAGAGATCCGTTGTTGAAAGTTTTGACT  
TATTTAATAAGACGCTCAGATGTCCACTAAAATACAAGAGTTTAGGAGTCCACCGGCGGCG  
CCTGCGGGGCGGGCCGCGCCGTCCGCTACAGGGTAGCTTCAGGGTAGGCCGCGCCCGACAT  
GGCGTC

>BSNB\_0731\_Endomelanconiosis\_endophytica

TACCTGATCCGAGGTCAACCTTGAGAAAATTCAGAAGGTTTCGTCCGGCGAGCGAACGTCCC  
GTCCTCCAAAGCGAGGTGTTTTCTACTACGCTTGAGGCAAGACGCCACCGCCGAGGTCTTTG  
AGGCGCGTCCGGTGAAGGACGGCGCCCAATACCAAGCAGAGCTTGAGTGGTGAAATGACG  
CTCGAACAGGCATGCCCTCGGAATACCAAGGGGCGCAATGTGCGTTCAAAGATTGATGA  
TTCACTGAATTCTGCAATTCACATTACTTATCGCATTTTCGCTGCGTTCTTCATCGATGCCAGA



ACCAAGAGATCCGTTGTTGAAAGTTTTAGTTTATTAACTTTTGATCAGACAGCTACGTTTAC  
TGACTGGAGTTTGGTAGTCCTCTGGCGGGCGCTGGCCAGCCCCGGTTAGGGGGCCGGCCGCG  
GAGGACCGCGCCCCGCCAAAGCAACAGAGGTAGATACATAGGGTGTGAGAGAAGAGGT  
CCGGAGACCCCTAGAACTCGGTAATGATCCTTCCGCAGGTTACCTACGGAAACCTTGTTAC  
GAACTTCTCC

>BSNB\_0732\_Akanthomyces\_attenuatus

CTGATCCGAGGTCACGTTCAGAAGTTGGGTGTTTTACGGCGTGGCCACGTCGGGGTTCCGGT  
GCGAGTTGGATTACTACGCAGAGGTGCGCCGCGGACGGGCGGCCACTCCATTTCCGGGGCCGG  
CGGTATGCTGCCGTTCCCCAACGCCGATTTCCCCAAAGGGAAGTCGAGGGTTGAAATGACG  
CTCGAACAGGCATGCCCCGCCAGAATGCTGGCGGGCGCAATGTGCGTTCAAAGATTTCGATGA  
TTCACTGAATTCTGCAATTCACATTACTTATCGCATTTTCGCTGCGTTCTTCATCGATGCCAGA  
ACCAAGAGATCCGTTGTTGAAAGTTTTGATTCATTTGTTTTGCCTTGCGGCGGATTCAGAAAA  
TGCTGATAATACAGAGTTTAGGGGTCTCCGGCGGGCGCCTGGGTCCGGGCCGCGGGCGGCG  
CGAGGCCGTCCGGACGCCGGGGCGAGTCCGCCGAAGCAACAGTAGGTATGTTACATAAAG  
GTTTGGGAGTTGTAAACTCGATAATGATCCCTCCGCTGGTTCACCAACGGAGACCTTGTTAC  
GACTTCTCCT

>BSNB\_0733\_Endomelanconiopsis\_endophytica

ACCTGATCCGAGGTCAACCTTGAGAAAAATTCAGAAGGTTTCGTCCGGCGAGCGAACGTCCCG  
TCCTCCAAAGCGAGGTGTTTTCTACTACGCTTGAGGCAAGACGCCACCGCCGAGGTCTTTGA  
GGCGCGTCCGGTGAAGGACGGCGCCCAATACCAAGCAGAGCTTGAGTGGTGAATGACGCT  
CGAACAGGCATGCCCCCTCGGAATACCAAGGGGCGCAATGTGCGTTCAAAGATTTCGATGATT  
CACTGAATTCTGCAATTCACATTACTTATCGCATTTTCGCTGCGTTCTTCATCGATGCCAGAAC  
CAAGAGATCCGTTGTTGAAAGTTTTAGTTTATTAACTTTTGATCAGACAGCTACGTTTACTG  
ACTGGAGTTTGGTAGTCCTCTGGCGGGCGCTGGCCAGCCCCGGTTAGGGGGCCGGCCGCGG  
AGGACCGCGGGCCCCGCCAAAGCAACAGAGGTAGGTACACATAGGGTGTGAGAGAAGAGGTC  
CGAAGACCCCTAGAACTCGGTAATGATCCTTCCGCAGGTTACCTACGGAAACCTTGTTACG  
AACTTCTCCT

>BSNB\_1019\_Colletotrichum\_gloeosporioides

CTGATCCGAGGTCAACCTTTGGAAAAATTGGGGGGTTTTACGGCAAGAGTCCCTCCGGATCCC  
AGTGCGAGACGTAAAGTTACTACGCAAAGGAGGCTCCGGGAGGGTCCGCCACTACCTTTGA  
GGGCCTACATCAGCTGTAGGGCCCCAACACCAAGCAGAGCTTGAGGGTTGAAATGACGCTC  
GAACAGGCATGCCCCGCCAGAATGCTGGCGGGCGCAATGTGCGTTCAAAGATTTCGATGATTC  
ACTGAATTCTGCAATTCACATTACTTATCGCATTTTCGCTGCGTTCTTCATCGATGCCAGAAC  
AAGAGATCCGTTGTTAAAAGTTTTGATTATTTGCTTGTACCACTCAGAAGAAACGTCGTAA  
ATCAGAGTTTGGTTATCCTCCGGCGGGCGCCGACCCGCCCGGGGGGGCGGGAGGCCGGGAG  
GGTCACGGGGACCCTACCCGCCGAAGCAACAGTTGTAGGTATGTTACAAAGGGTTGTAGA  
CGGTAAACTCAGTAATGATCCCTCCGCTGGTTCACCAACGGAGACCTTGTTA

>BSNB\_1021\_Colletotrichum\_theobromicola

CTGATCCGAGGTCAACCTTTGGAAAAATTGGGGGGTTTTACGGCAAGAGTCCCTCCGGATCCC  
AGTGCGAGACGTAAAGTTACTACGCAAAGGAGGCTCCGGGAGGGTCCGCCACTACCTTTGA  
GGGCCTACATCAGCTGTAGGGCCCCAACACCAAGCAGAGCTTGAGGGTTGAAATGACGCTC  
GAACAGGCATGCCCCGCCAGAATGCTGGCGGGCGCAATGTGCGTTCAAAGATTTCGATGATTC  
ACTGAATTCTGCAATTCACATTACTTATCGCATTTTCGCTGCGTTCTTCATCGATGCCAGAAC  
AAGAGATCCGTTGTTAAAAGTTTTGATTATTTGCTTGTACCACTCAGAAGAAACGTCGTAA

ATCAGAGTTTGGTTATCCTCCGGCGGGCGCCGACCCGCCCCGGGGGGGCGGGAGGCCGGGAG  
GGTCACGGGGACCCTACCCGCCGAAGCAACAGTTGTAGGTATGTTACAAAGGGTTGTAGA  
CGGTAAACTCAGTAATGATCCCTCCGCTGGTTCACCAACGGAGACCTTGTTA

>BSNB\_1036\_Pestalotiopsis\_sp

CCATGTGACTTACCTTTTGTTCCTCGGCAGAAGTTATAGGTCTTCTTATAGCTGCTGCCGGT  
GGACCATTAAACTCTTGTTATTTTATGTAATCTGAGCGTCTTATTTTAATAAGTCAAAACTTTC  
AACAAACGGATCTCTTGTTCTGGCATCGATGAAGAACGCAGCGAAATGCGATAAGTAATGT  
GAATTGCAGAATTCAGTGAATCATCGAATCTTTGAACGCACATTGCGCCCATTAGTATTCTA  
GTGGGCATGCCTGTTTCGAGCGTCATTTCAACCCTTAAGCCTAGCTTAGTGTTGGGAATCTACT  
TCTCTTAGGAGTTGTAGTTCCTGAAATACAACGGCGGATTTGTAGTATCCTCTGAGCGTAGTA  
ATTTTTTCTCGCTTTTGTAGGTGCTATAACTCCCAGCCGCTAAACCCCCAATTTTTTGTGGT  
TGACCTCGGATCAGGTAGGAATACCCGCTGAACTTAAGCATATCARAA

>BSNB\_1037\_Pestalotiopsis\_sp

AACCCATGTGAACTTACCTTTTGTTCCTCGGCAGAAGTTATAGGTCTTCTTATAGCTGCTGC  
CGGTGGACCATTAAACTCTTGTTATTTTATGTAATCTGAGCGTCTTATTTTAATAAGTCAAAA  
CTTTCAACAACGGATCTCTTGTTCTGGCATCGATGAAGAACGCAGCGAAATGCGATAAGTA  
ATGTGAATTGCAGAATTCAGTGAATCATCGAATCTTTGAACGCACATTGCGCCCATTAGTAT  
TCTAGTGGGCATGCCTGTTTCGAGCGTCATTTCAACCCTTAAGCCTAGCTTAGTGTTGGGAATC  
TACTTCTCTTAGGAGTTGTAGTTCCTGAAATACAACGGCGGATTTGTAGTATCCTCTGAGCGT  
AGTAATTTTTTCTCGCTTTTGTAGGTGCTATAACTCCCAGCCGCTAAACCCCCAATTTTTTG  
TGGTTGACCTCGGATCAGGTAGGAATACCCGCTGAACTTAAGCATATCAATAA

>BSNB\_1038\_Beuveria\_bassiana

CTGTGAACCTACCTATCGTTGCTTCGGCGGACTCGCCCCAGCCCGGAGGCGGACTGGACCAG  
CGGCCCCGCCGGGGACCWCAAACCTCTTGTTATTCAGCATCTTCTGAATACGCCGCAAGGCAA  
AACAAATGAATCAAAACTTTCAACAACGGATCTCTTGCTCTGGCATCGATGAAGAACGCA  
GCGAAATGCGATAAGTAATGTGAATTGCAGAATCCAGTGAATCATCGAATCTTTGAACGCA  
CATTGCGCCCCGCCAGCATTCTGGCGGGCATGCCTGTTTCGAGCGTCATTTCAACCCTCGACCTC  
CCCTTGGGGAGGTCGGCGTTGGGGACCGGCAGCACACCCGCCGCCCCTGAAATGGAGTGGCG  
GCCCCGTCCGCGGCGACCTCTGCGTAGTAATACAGCTCGCACCGGAACCCCGACGCGGCCAC  
GCCGTAAAACACCCAACCTTCTGAACGTTGACCTCGAATCAGGTAGGACTACCCGCTGAACTT  
AAGCATATCAATAAGCGGAGGAA

>BSNB\_1040\_Trichoderma\_sp

CTCCCAACCCAATGTGACCATAACCAAACCTGTTGCCTCGGCGGGGTACGCCCCGGGTGCGTC  
GCAGCCCCGGAACCAGGCGCCCGCCGGAGGGACCAACCAAACCTCTTCTGTAGTCCCCTCG  
CGGACGTTATTTCTTACAGCTCTGAGCAAAAATTCAAAATGAATCAAAACTTTCAACAACGG  
ATCTCTTGTTCTGGCATCGATGAAGAACGCAGCGAAATGCGATAAGTAATGTGAATTGCAG  
AATTCAGTGAATCATCGAATCTTTGAACGCACATTGCGCCCGCCAGTATTCTGGCGGGCATG  
CCTGTCCGAGCGTCATTTCAACCCTCGAACCCTCCGGGGGGTTCGGCGTTGGGGATCGGGAA  
CCCCTAAGACGGGATCCCGGCCCGGAAATACAGTGGCGGTCTCGCCGAGCCTCTCCTGCG  
CAGTAGTTTGCACAACTCGCACCGGGAGCGCGGCGCTCCACGTCCGTAAAACACCCAACCT  
TCTGAAATGTTGACCTCGGATCAGGTAGGAATACCCGCTGAACTTAAGCATATCAA

>BSNB\_1041\_Beuveria\_bassiana

CCCCTAAATCCCTTCTGTGACCTACCTATCGTTGCTTCGGCGGACTCGCCCCAGCCCGGACGC  
GACTGGACCAGCGGCCCGCCGGGGACCTCAAACCTCTTGTTATTCAGCATCTTCTGAATACG  
CCGCAAGGCAAAACAAATGAATCAAAACTTTCAACAACGGATCTCTTGCTCTGGCATCGA

TGAAGAACGCAGCGAAATGCGATAAGTAATGTGAATTGCAGAATCCAGTGAATCATCGAAT  
CTTTGAACGCACATTGCGCCCGCCAGCATTCTGGCGGGCATGCCTGTTTCGAGCGTCATTTCA  
ACCCTCGACCTCCCTTGGGGAGGTGCGCGTTGGGGACCGGCAGCACACCGCCGGCCCTGA  
AATGGAGTGGCGGCCCCGTCCGCGGCGACCTCTGCGTAGTAATACAGCTCGCACCGGAACCC  
CGACGCGGCCACGCCGTAAAACACCCAACCTTCTGAACGTTGACCTCGAATCAGGTAGGACT  
ACCCGCTGAACTTAAGCATATCAATAAGCGGAGGAA

>BSNB\_1042\_Beauveria\_bassiana

TCTGTGAGCCTACCTATCGTTGCTTCGGCGGACTCGCCCCAGCCCGGACGCGGACTGGACCA  
GCGGCCCCGCGGGGACCTCAAACCTTTGTATTCCAGCATCTTCTGAATACGCCGCAAGGCAA  
AACAAATGAATCAAAACTTTCAACAACGGATCTCTTGGCTCTGGCATCGATGAAGAACGCA  
GCGAAATGCGATAAGTAATGTGAATTGCAGAATCCAGTGAATCATCGAATCTTTGAACGCA  
CATTGCGCCCCGCGAGCATTCTGGCGGGCATGCCTGTTTCGAGCGTCATTTCAACCCTCGACCTC  
CCCTTGGGGAGGTGCGCGTTGGGGACCGGCAGCACACCGCCGGCCCTGAAA  
TGGAGTGGCGGCCCCGTCCGCGGCGACCTCTGCGTAGTAATACAGCTCGCACCGGAACCCCG  
ACGCGGCCACGCCGTAAAACACCCAACCTTCTGAACGTTGACCTCGAATCAGGTAGGACTAC  
CCGCTGAACTTAAGCATATCAATAAGCGGAGGAA

>BSNB\_1043\_Mucor\_sp

CCGTATTTCTTATTTACTGTGAACTGTTTTATTGTTTGRCGCTTGAGGAATGTTGTTTAGCCAT  
AGGGATAGGCTAGGCAAATGTTAACCGAGTCAAAGTCAGGCTTAGGCCTGGTATCCTATTC  
ATTATTTACCAAAAGAATTCAGAATTATTATTGTAACATAAGCGTAAAAAACTTATAAAACA  
ACTTTTAACAACGGATCTCTTGGTTCTCGCATCGATGAAGAACGTAGCAAAGTGCGATAACT  
AGTGTTGAATTGCATATTCAGTGAATCATCGAGTCTTTGAACGCATCTTGCGCTCAATGGTATT  
CCATTGAGCACGCCTGTTTCAGTATCAAAAACACCCACATTACAACTTGTGTTGTTGAATG  
GAATTGAGAGTTTCGGCTTAACGCTGATCTCTTTAAAWTATTAGGCCTGAACTTTTGTCTT  
TYYGCTGAACATTTTTTTAATATAAAGGAATGCTCTAGTAAAAAGACTCTTTCTGGGGCCTC  
CCAAATAAATCATTCTTAACTTGATCTGAAATCAGGTGGGATTACCCGCTGAACTTAAGCA  
TATCATAAGCCGGAGGA

>BSNB\_1044\_Penicillium\_sp

AAAGCTGTACGGCGAGTGAGCGGCAAGAGCTCAAATTTGARRGCTGGCTCCTTCGGGGTCC  
GCATTGTAATTTGCAGAGGATGCTTCGGGAGTGGCCCCCATCTAAGTGCCCTGGAACGGGGCC  
GTCATAGAGGGTGAGAATCCCGTCTGGGATGGGGTGTCACGCCCCGTGTGAAGCTCCTTCGA  
CGAGTCGAGTTGTTTGGGAATGCAGCTCTAAATGGGTGGTAAATTTTCATCTAAAGCTAAATA  
CTGGCCGGAGACCGATAGCGCACAAGTAGAGTGATCGAAAGATGAAAAGCACTTTGAAAA  
GAGAGTTAAACAGCACGTGAAATTGTTGAAAGGGAAGCGCTTGCGACCAGACTCGCCACG  
GGGTCAGCCGGCATTTCGTGCCGGTGTACTTCCCCGCGGGCGGGCCAGCGTCGGTTTGGGCG  
GCCGGTCAAAGGCCCTCGGAATGTAACGCCCCCGGGGCGTCTTATAGCCGAGGGTGCCAT  
GCGGCCAGCCCGGACCGAGGAACGCGCTTCGGCTCGGACGCTGGCATAATGGTCGTAAGCG  
ACCCGTCTTGAAACACGGACCAAA

>BSNB\_1045\_Penicillium\_sp

CCACCTCCACCCCTTGTCTCCACACCTGTTGCTTCGGCGGGGCCACCGGGGCCACCCGGTCG  
CCGGGGGACATCCGTCCCCGGGCCCCGCGCCCCGCCGAGGCGCTCTGTGAACCCTGATGAAGA  
TGGGCTGTCTGAGTGATATGAAAATTGTCAAACTTTCAACAATGGATCTCTKGGTTCCGGC  
ATCGATSAAGAACGCAGCGAAWTGCGATAAGTAATGTGAATTGCAGAATTCGGTGAATCAT  
CGAATCTTTGAACGCACATTGCGCCCCCTGGCATTCCGGGGGGCATGCCTGTCCGAGCGTCA  
TTTCTGCCCTCAAGCACGGCTTGTGTGTTGGGTGTGGTCCCCCTGGGGACCTGCCCCGAAAGG  
CAGCGGCYACGTCCGTCTGGTCCTCGAGCGTATGGGGCTCTGTCACTCGCTCGGGAAGGACC

TGCGGGGGTTGGTCACCACCACATCTGKTACAAGGTTGACCTCGGATCAGGTAGGAGTTAC  
CCGCTTA

>BSNB\_1046\_Penicillium\_simplicissimum

CGGGCCCTCACTCGGCAATGATCCTTCCGTAGGTGAACTTGCGGAAGGATCATTACCGAGTG  
AGGGCCCTCTGGGTCCAACCTCCCACCCGTGTTTATCGTACCTTGTTGCTTCGGCGGGCCCGC  
CTCACGGCCGCGGGGGGGCATCCGCTCCCGGGCCCGCGCCCGCGAAGACACCAATGAACTC  
TGTCTGAAGATTGCAGTCTGAGCAGATTAGCTAAATCAGTTAAAACCTTTCAACAACGGATCT  
CTTGGTTCCGGCATCGATGAAGAACGCAGCGAAATGCGATACGTAATGTGAATTGCAGAAT  
TCAGTGAATCATCGAGTCTTTGAACGCACATTGCGCCCCCTGGTATTCCGGGGGGGCATGCCT  
GTCCGAGCGTCATTGCTGCCCTCAAGCACGGCTTGTGTGTTGGGCTCCGCCCCCGGCTCCC  
GGGGGGCGGGCCCGAAAGGCAGCGGCGGCACCGCGTCCGGTCCTCGAGCGTATGGGGCTTG  
TACCCGCTCTGTAGGCCCGGCCGCGCCCGCGCGACCCCAATCAATCTCCAGGTTACCTC  
GGAATCAGGT

>BSNB\_1048\_Neosartorya\_sp

CACTCGGTAATGATCCTTCCGTAGGTGAACCTGCGGAAGGATCATTACCGAGTGAGGGCCCT  
CTGGGTCCAACCTCCCACCCGTGTCTATTGTACCTTGTTGCTTCGGCGGGCCCGCCGTTTCGA  
CGGCCCGCGGGGAGGCCTCGCGCCCCGGGCCCGCGCCCGCCGAAGACCCCAACTGAACG  
CTGTTCTGAAAGTATGCAGTCTGAGTTGATTATCATAATCAGTTAAAACCTTTCAACAACGGA  
TCTCTTGGTTCCGGCATCGATGAAGAACGCAGCGAAATGCGATAAGTAATGTGAATTGCAG  
AATTCAAGTGAATCATCGAGTCTTTGAACGCACATTGCGCCCCCTGGTATTCCGGGGGGCATG  
CCTGTCCGAGCGTCATTGCTGCCCTCAAGCACGGCTTGTGTGTTGGGCCCGCGTCCCCGGTTT  
CCCCCGGGGACGGGCCCGAAAGGCAGCGGCGGCACCGCGTCCGGTCCTCGAGCGTATGGG  
GCTTTGTACCCGCTCTGTAGGCCTGGCCGCGGCCAGCCGACCCCAACTTTATTTCAGGTG  
CACCTCGATTCAATC

>BSNB\_1049\_Penicillium\_oxalicum

CGGTATGATCCTTCCGTAGGTGAACCTGCGGAAGGATCATACCGAGTGAGGGCCCTCTGGGT  
CCAACCTCCCACCCGTGTTTATCGTACCTTGTTGCTTCGGCGAGCCCGCCTCACGGCCGCGG  
GGGGCATCTGCCCCCGGGCCTGCGCTCGCCGAAGACACACAAACGAACTCTTGTCTGAAGA  
TTGCAGTCTGAGTACTTGACTAAATCAGTTAAAACCTTTCAACAACGGATCTCTTGGTTCCGGC  
ATCGATGAAGAACGCAGCGAAATGCGATAAGTAATGAATTGCAGAATTCAGTGAATCATCG  
AGTCTTTGAACGCACATTGCGCCCCCTGGTATTCCGGGGGGCATGCCTGTCCGAGCGTCATT  
GCTGCCCTCAAGCACGGCTTGTGTGTTGGGCTCTCGCCCCCCCCCTTGTGGGAGGGCGGGCC  
CGAAAGGCAGCGGCGGCACCGTGTCCGGTCCTCGAGCGTATGGGGTTTGTACCCGCTCTGT  
AGGCCCGGCGGGCCCGCGCGGAACCAATCAACTTACCCATCTCACCTATCAAACCCCCC  
G

>BSNB\_1053\_Beuveria\_bassiana

GGCACCGCCAACAGGCGGCAAGGCTGGAGTATTTTATTACCCTTGTCTTTTGCGCACTTGTTG  
TTTCCTGGGCGGGTTCGCCCCGCTCCAGGACCACATGATAAACCTTTTTTATGCAGTTGCAAT  
CAGCGTCAGTACAACAAATGTAAATCATTTACAACCTTTCAACAACGGATCTCTTGGTTCTGG  
CATCGATGAAGAACGCAGCGAAATGCGATACGTAAGTGAATTGCAGAATTCAGTGAATCA  
TCGAATCTTTGAACGCACATTGCGCCCTTTGGTATTCCAAAGGGCATGCCTGTTTCGAGCGTCA  
TTTGTACCCTCAAGCTTTGCTTGGTGTTGGGCGTTTTTGTCTTTGGTTTTGCCCAAAGACTCGC  
CTTAAAACGATTGGCAGCCGGCCTACTGGTTTCGAGCGCAGCACATTTTTCGCTTGCAAT  
CAGCAAAAGAGGACGGCACTCCATCAAGACTCTTTATCACTTTTGACCTCGGATCAGGTAGG  
GATACCCGCTGAACTTAAGCATATCAATAAGCCGGAGGAA

>BSNB\_1054\_Pestalotiopsis\_theae

AAGCTCCAACCCATGTGACTTACCTTTTTGTTGCCTCGGCAGAGGTTACCTGGTACCTGGAGA  
CAGGTTACCCCTGTAGCAACTGCCGGTGGACTACTAAACTCTTGTTATTTTATGTAATCTGAGC  
GTCTTATTTTAATAAGTCAAAACTTTCAACAACGGATCTCTGGGTTCTGGCATCGATGAAGA  
ACGCAGCGAAATGCGATAAGTAATGTGAATTGCAGAATTCAGTGAATCATCGAATCTTTGA  
ACGCACATTGCGCCCATTAGTATTCTAGTGGGCATGCCTGTTTCGAGCGTCATTTCAACCCTTA  
AGCCTAGCTTAGTGTTGGGAATTTACAGTTATGTAATTCCTGAAATACAACGGCGGATCTGT  
GGTATCCTCTGAGCGTAGTAAATTATTTCTCGCTTTTGTTAGGTGCTGCAGCTCCCAGCCGCT  
AAACCCCCAATTTTTTGTGGTTGACCTCGGATCAGGTAGGAATACCCGCTGAACTTAAGCAT  
ATCAATAAGCGGAGGA

>BSNB\_1055\_Fusarium\_sp

CTCCAAACCCCTGTGAACATACCTTATGTTGCCTCGGCGGATCAGCCCGCGCCCCGTAAAAA  
GGGACGGCCCCGCCGAGGAACCCTAAACTCTGTTTTAGTGGAACCTTCTGAGTATAAAAAA  
CAAATAAATCAAAACTTTCAACAACGGATCTCTTGGTTCTGGCATCGATGAAGAACGCAGC  
AAAATGCGATAAGTAATGTGAATTGCAGAATTCAGTGAATCATCGAATCTTTGAACGCACAT  
TGCGCCCGCCAGTATTCTGGCGGGCATGCCTGTTTCGAGCGTCATTTCAACCCTCAAGCCCAG  
CTTGGTGTTGGGAGCTGCAGTCCTGCTGCACTCCCCAAATACATTGGCGGTCACGTCGAGCT  
TCCATAGCGTAGTAATTTACACATCGTTACTGGTAATCGTCGCGGCCACGCCGTTAAACCCC  
AACTTCTGAATGTTGACCTCGGATCAGGTAGGAATACCCGCTGAACTTAAGCATATCATAAA  
GCGGAGGA

>BSNB\_1056\_Lecanicillium\_sp

ACCAAAACCCCTTATGTGAACATACCACGATGTTGCTTCGGCGGACTCGCCCCGGCGTCCGGA  
CGGCCTAGCGCCGCCCGCGGCCCGGATCCAGGCGGCCGCCGGAGACCACCAAAACTATTTT  
GTATCAGCAGTTTTTTCTGAATCCGCCGCAAGGCAAAACAAATGAATCAAAACTTTCAACAA  
CGGATCTCTTGGTTCTGGCATCGATGAAGAACGCAGCGAAATGCGATAAGTAATGTGAATTG  
CAGAATTCAGTGAATCATCGAATCTTTGAACGCACATTGCGCCCGCCAGCATTCTGGCGGGC  
ATGCCTGTTTCGAGCGTCATTTCAACCCTCGACTTCCCTTTGGGGAAATCGGCGTTGGGGACTG  
GCAGCATACCGCCGGCCCCGAAATGGAGTGGCGGCCCGTCCGCGGCGACCTCTGCGTAGTA  
ATCCAACCTCGCACCGGAACCCCGACGTGGCCACGCCGTAAACACCCCCACTTTCTGAACG  
TTGACCTCGGATCAGGTAGGAATACCCGCTGAACTTAAGCATATCAATAAGGCRGAGGA

>BSNB\_1057\_Fusarium\_sp

TAGAACGTACGTAGAAAAAAGTAGTAGCTCYTYGCTCCYACCCCTCGACGTCCTT  
ATGTTGCCTCGGCGGACACCCSCGCCCGKAAAACGGGACGGCCCGCCAGAAAACCGAARC  
TCTAATGTTTCTTATTGTAACCTTCTGAGTWWWACAAACAAATAAATCAAAACTTTCAACAA  
CGGATCTCTTGGTTCTGGCATCGATGAASAACGCAGCAAAATGCGATAAGTAATGTGAATTG  
CAGAATTCWGTGAATCATCGAATCTTTGAACGCACATTGCGCCCGCTGGTATTCCGGCGGGC  
ATGCCTGTTTCGAGCGTCATTTCAACCCTCAAGCCCCCGGGTTGGTGTTGGGGATCGGCTCTG  
CCCTTCTGGGCGGTGCCGCCCCGAAMTACATTGGCGGTCTCGCTGCASCCTCCATTGCGTA  
GTAGCTAACACCTCGCAACTGGAACGCGGCGGGCCATGCCGTAAAACCCCAACTTCTGAA  
TGTTGACCTCGGATCAGGTAGGAATACCCGCTGAACTTAAGCATATCAATAAGCGGAGGAA

>BSNB\_1058\_Fusarium\_sp

AAAGCCCCTGTGAACATACCTTAATGTTGCCTCGGCGGATCAGCCCGCGCCCCGTAAAACG  
GGACGGCCCCGCCAGAGGACCCAAACTCTAATGTTTCTTATTGTAACCTTCTGAGTAAAACAAA  
CAAATAAATCAAAACTTTCAACAACGGATCTCTTGGTTCTGGCATCGATGAAGAACGCAGC  
AAAATGCGATAAGTAATGTGAATTGCAGAATTCAGTGAATCATCGAATCTTTGAACGCACAT  
TGCGCCCGCTGGTATTCCGGCGGGCATGCCTGTTTCGAGCGTCATTTCAACCCTCAAGCCCC

GGGTTTGGTGTGTTGGGGATCGGCTCTGCCCTTCTGGGCGGTGCCGCCCCGAAATACATTGGC  
GGTCTCGCTGCAGCCTCCATTGCGTAGTAGCTAACACCTCGCAACTGGAACGCGGCGCGGCC  
ATGCCGTAAAACCCCAACTTCTGAATGTTGACCTCGGATCAGGTAGGAATACCCGCTGAACT  
TAAGCATATCAATAAGCCGGAGGAA

>BSNB\_1059\_Arthrinium\_sp

CAACTCCATACCATCTGTAACTACCCAGTTATGCCTCGGCGTAAGCTCGGTTGGAGGCAC  
CTGCAGCTACCCTGTAGTTGCGGACTGCCAACTCCAGCCGCGGCCCGCGGCGGTACACTA  
AACTCTGTTTTATTTTATATTCTGAGCGTCTTATTTTAATAAGTTAAAACTTTCAACAACGGAT  
CTCTTGGTTCTGGCATCGATGAAGAACGCAGCGAAATGCGATAAGTAATGTGAATTGCAGA  
ATTCAGTGAATCATCGAATCTTTGAACGCACATTGCGCCCATCAGTATTCTGGTGGGCATGC  
CTGTTGAGCGTCATTTCAACCCTTAAGCCTAGCTTAGTGTTGGGAATCTGCTGTACTGCAGT  
TCCTTAAAGACAGTGGCGGAGCGGCGGTAGTCTCTGAGCGTAGTAATTTATTTCTCGCTTTT  
GTCAGGCTCTGTCTCCCGCCATAAAACCCCAATTTTTTAGTGTTGACCTCGGATCAGGTA  
GGAATACCCGCTGAACTTAAGCATATCAATAARGCGGAGGA

>BSNB\_1061\_Penicillium\_sp

GAACCCGCACTCGGTAATGATCCTTCCGTAGGTGAACCTGCGGAAGGATCATTACCGAGTG  
CGGGTTCCAACGAGCCCAACCTCCCACCCGTGTCTACCGTTACCGCGTTGCCTCGGCGGGCC  
CACTGGGGCCTGGCCCCGGTCGCCGGGGGGCTTCTGCCCCCGGGCCCGCGCCCGCCGAAGC  
ACCCTAGAACCCTGTCTGAACAGTGAGTCTGAGTCGGATATTGAATCATTAAAACTTTCAAC  
AACGGATCTCTTGGTTCCGGCATCGATGAAGAACGCAGCGAAATGCGATAAGTAATGTGAA  
TTGCAGAATTCCGTGAATCATCGAATCTTTGAACGCACATTGCGCCCCCTGGCATTCCGGGG  
GGCATGCCTGTCCGAGCGTCATTTCTGCCCTCCAGCACGGCTGGGTGTTGGGCGCTGTCCCCC  
CGGGGACACGCCCCAAAAGCAGTGCGGCGCCGGTCGGGTCTCGAGCGTATGGGGCTTTGT  
CTCCGCTCGTTGGACTCGGTGCGCGCTGGTCTTAAACAGGCGACCCCTCGGGGTCGCCTAT  
CCGGTCCCCCTCGGAATTCCAAGG

>BSNB\_1063\_Mucor\_hiemalis

CTTTGCTAGTTTTCTAGCGAATGGTTCATTCTTTTTTACTGTGAACTGTTTTAATTTTTCAGCGT  
CTGAGGAATGTCTTTTAGCCATAGGGATAGGCTACTAGAATGTTAACCAGAGCTGAAAGTCAG  
GCTTAGGCCTGGTATCCTATTAATTATTTACCAAAAAGAATTCAGTATTATAATTGTAACATAA  
GCGTAAAAAACTTATAAAACAACTTTTAACAACGGATCTCTTGGTTCTCGCATCGATGAAGA  
ACGTAGCAAAGTGCAGATAACTAGTGTGAATTGCATATTCAGTGAATCATCGAGTCTTTGAAC  
GCAACTTGCGCTCAATGGTATTCCATTGAGCACGCCTGTTTCAGTATCAAAAACACCCCA  
TTCATAATTTTGTGTGAATGGAAATGAGAGTTTCGGCTTTATTGCTGAATTCTTTAAATTTAT  
TAGGCCTGAACTATTGTTCTTTCTGCCTGAACATTTTTTTAATATAAAGGAATGCTCTAGTAA  
AAAGACTATCTCTGGGGCCTCCCAAATAAATCATTCTTAAATTTGATCTGAAATCAGGCGGG  
ATTACCCGCTGAACTTAAGCATATCAATAA

>BSNB\_1065\_Fusarium\_sp

AACTGCCAACCCTGTGACATACCTTRATGTTGCCTCGGCGGATCAGCCCGCGCCCCGTAAA  
ACGGGACGGCCCGCCAGAGGACCCAACTCTAATGTTTCTTATTGTAACCTTCTGAGTAAAAC  
AAACAAATAAATCAAAACTTTCAACAACGGATCTCTTGGTTCTGGCATCGATGAAGAACGC  
AGCAAAATGCGATAAGTAATGTGAATTGCAGAATTCAGTGAATCATCGAATCTTTGAACGC  
ACATTGCGCCCGCTGGTATTCCGGCGGGCATGCCTGTTGAGCGTCATTTCAACCCTCAAGC  
CCCCGGGTTTGGTGTGGGGATCGGCTCTGCCCTTCTGGGCGGTGCCGCCCCGAAATACAT  
TGGCGGTCTCGCTGCAGCCTCCATTGCGTAGTAGCTAACACCTCGCAACTGGAACGCGGCGC  
GGCCATGCCGTAAAACCCCAACTTCTGAATGTTGACCTCGGATCAGGTAGGAATACCCGCTG  
AACTTAAGCATATCAATAAGCGGAGGAA

>BSNB\_1067\_Penicillium\_sp

CCTTCCGTAGGTGAACCTGCGGAAGGATCATTACCGAGTGCGGGGCCCTCGCGGCCCAACCTC  
CCACCCTTGTCTCTCTACACCTGTTGCTTTGGCGGGCCCACCGGGGCCACCCGGTCGCCGGG  
GGACGCTCGTCCCCGGGCCCCGCGCCCGCCGAAGCGCCCTGTGAACCCTGATGAAGATGGAC  
TGTCTGAGTACCATGAAAATTGTCAAACTTTCAACAATGGATCTCTTGGTTCCGGCATCGAT  
GAAGAACGCAGCGAAATGCGATAAGTAATGTGAATTGCAGAATCCCGTGAATCATCGAATC  
TTTGAACGCACATTGCGCCCCCTGGCATTCCGGGGGGCATGCCTGTCCGAGCGTCATTTCTGC  
CCTCAAGCACGGCTTGTGTGTTGGGTGCGGTCCCCCGGGGACCTGCCCCGAAAGGCAGCGG  
CGACGTCCGTCCGGTCTCGAGCGTATGGGGCTTTGTCACTCGCTCGGGAAGGACCTGCGGG  
GCGTTGGTCACCACCATATTTGACCTACGGCTGATTACCC

>BSNB\_1069\_Beuveria\_sp

CTACCAACCCTTATGTGACCTACCTATCGTTGCTTCGGCGGACTCGCCCCAGCCGGACGCGG  
ACTGGACCAGCGGCCCGCCGGGGACCATCAAACCTCTTGTATTATCAGCATCTTCTGAATACGC  
CGCAWGGCAAAACAAATAAATTAAACTTTCAACAACGGATCTCTTGGCTCTGGCATCGAT  
GAAGAACGCAGCGAAATGCGATAAGTAATGTGAATTGCAGAATCCAGTGAATCATCGAATC  
TTTGAACGCACATTGCGCCCCGCCAGCATTCTGGCGGGCATGCCTGTTGAGCGTCATTTCAA  
CCCTCGACCTCCCTTTGGGGAAGTCGGCGTTGGGGACCGGCAGCACACCGCCGGGCCCTGAA  
ATGGAGTGGCGGCCCGTCCGCGGCGACCTCTGCGTAGTAAACCAACTCGCACCGGAACCCC  
GACGTGGCCACGCCGTAAACACCCAACTTCTGAACGTTGACCTCGAATCAGGTAGGACTA  
CCCCTGAACCTAAGCATATCAATAAGCCGGAGGA

>BSNB\_1250\_Isaria\_farinos

GCGGAGGGATCATTACCGAGTTTTCAACTCCCAAACCCCTTTGTGAACATACCTATCGTTGCT  
TCGGCGGACTCGCCCCAGCGTCCGGCCGGCCCCGCGCCGGCCGCGGCCTGGATCCAGGCGG  
CCGCCGGAGACCCCCAACTCTGTATTCTCAGTATCTTCTGAATCCGCCGCAAGGCAAAACA  
AATGAATCAAACTTTCAACAACGGATCTCTTGGTTCTGGCATCGATGAAGAACGCAGCGA  
AATGCGATAAGTAATGTGAATTGCAGAATTCAGTGAATCATCGAATCTTTGAACGCACATTG  
CGCCCCGCCAGCATTCTGGCGGGCATGCCTGTTGAGCGTCATTTCAACCCTCGACTTCCCTTT  
GGGGAATCGGCGTTGGGGACCGGCCGTATACCGCCGGCCCCGAAATGAAGTGGCGGGCCC  
GTCCGCGGCGACCTCTGCGTAGTAATCCAACTCGCACCGGAACCCCCGACGTGGCCACGCCG  
TAAACCCCCGACTTCTGAACGTTGACCTCGGATCAGGTAGGAATACCCGCTGAACCTAAGC  
ATATCA

>BSNB\_1252\_Cordyceps\_militaris

GCGGAGGGATCATTAACGAGTTTCCCAAACCTCCCAAACCCCTTTGTGAACATACCTATCGTTGCTT  
CGGCGGACTCGCCAGCGCCTGGACGCGGGCCTGGGCGGCGGCCGTGCGGGGCCCAAC  
ACTGTATCTACCAGTTTTTCTGAATCCGCCGCAAGGCAAAACAAATGAATCAAACTTTCAA  
CAACGGATCTCTTGGCTCTGGCATCGATGAAGAACGCAGCGAAATGCGATAAGTAATGTGA  
ATTGCAGAATTCAGTGAATCATCGAATCTTTGAACGCACATTGCGCCCCGCCAGCATTCTGGC  
GGGCATGCCTGTTGAGCGTCATTTCAACCCTCGACGTCCCTGGGGGATGTGCGCGTTGGG  
GACCGGCAGCACACCGCCGCCCGCGAAATGAAGTGGCGGCCCGTCCGCGGCGACCTCTGCG  
TAGTACCCCAACTCGCACCGGGAACCCGACGTGGCCACGCCGTAAAACGCCCAACTCTGAA  
CGTTGACCTCGGATCAGGTAGGAATACCCGCTGAACCTAAGCATATC

>BSNB\_1253\_Ophiocordyceps\_forquignonii

GCGGAGGGATCATTACTGAGTGTTAAAACTCTCTAACCCCCTATGTGATTACTACCATTTTTTA  
TTCCTCGGCAGTGTAAGGCGGGAAGAGTATCCCCCTCTATATTTCTCTATTATAGGGGATTCT  
AGAGGGGCGCTGCTCCCCCTCTCCCCCGCTGCCGGTGGAACCACTATAATCTATATTTCA

TCTATTGAGTCTTCTGAGTTTATAATAACAAAACGCATAAAAACTTTCAGCAACGGATCTCTT  
GGCTCTGGCATCGATGAAGAACGCAGCGAAATGCGATAAGTAATGCGAATTGTAGATTTCA  
GTGAGTCATCGAATCTTTGAACGCACATTGCGCCTGCTGGCCATTCCAGCAGGCATGCCTGT  
CCGAGCGTCATTATCAACCCCTCTCAGGCTTTCTTATAGGGTTTTAATAGGACCCTATATCGA  
TTGACTGGCACCTGGAGATTGGCCGTGCCCCTCTTGTTTTTTCTTAAAACCAAGGGGGAAGG  
CCAGCTCTGAAATACAGTGGCGACTCGAGGTCTTACTTCTTCCCCTGGCAGTAAAACCTCTTG  
CTCGCAACGGGACTAGTGACCTTGTGTTAGCCATCTTAACACCCTAT



FIGURE S1. R SCRIPT USED: GENERATION OF A .MGF AND .CSV FILES

```
```{r setup, include=FALSE}

library(MALDIquant)
library(MALDIquantForeign)

path <- "C:/Users/Desktop/..." #enter directory path
setwd(path)

spectra <- import(path, verbose=FALSE, excludePattern = NULL)

liste_fichiers <- list.files(path)
NameListe = as.list(liste_fichiers)
condition = c(15,      ## HwS
              30,      ## baseline
              6,       ## SnR
              2000, 20000) ## Trim
spectra2 = transformIntensity(spectra, method="sqrt")
spectra2 = trim(spectra2, range = c(condition[4], condition[5] ))
spectra2 = smoothIntensity(spectra2, method="SavitzkyGolay",
                           halfWindowSize=condition[1])
spectra2 <- removeBaseline(spectra2, method="SNIP",
                           iterations=condition[2])
spectra2 <- calibrateIntensity(spectra2, method="TIC")
peaks <- detectPeaks(spectra2, SNR=condition[3],
halfWindowSize=condition[1])
a = plot(peaks[[1]])

peaks <- binPeaks(peaks)

liste = list()
```

```

mgf <- paste(path, ".mgf", sep = "")

for (i in 1:length(peaks)) {

  test = matrix(data = NA, nrow = length(peaks[[i]]@mass), ncol= 2)

  colnames(test) = c("m/z", "intensity")

  test[,1] = peaks[[i]]@mass

  test[,2] = peaks[[i]]@intensity


  write.table("BEGIN IONS", file = mgf, append = TRUE, quote = FALSE, sep
= "\t ", row.names = FALSE, col.names = FALSE)

  write.table("PEPMASS=0", file = mgf, append = TRUE, quote = FALSE, sep
= "\t ", row.names = FALSE, col.names = FALSE)


  write.table(list(test), file = mgf, append = TRUE, quote = FALSE, sep
= "\t ", row.names = FALSE, col.names = FALSE)

  write.table("END IONS", file = mgf, append = TRUE, quote = FALSE, sep
= "\t ", row.names = FALSE, col.names = FALSE)

  write.table("", file = mgf, append = TRUE, quote = FALSE, sep = "\t ",
row.names = FALSE, col.names = FALSE)
}

csv <- paste(path, ".txt", sep = "")

for (i in 1:length(liste_fichiers)) {

  write.table(liste_fichiers[i], file = csv, append = TRUE, quote =
FALSE, sep = "\t ", eol = "\n", na = "NA", dec = ".", row.names = FALSE,
col.names = FALSE, qmethod = c("escape", "double"))
}

...

```

TABLE S6. PARAMETERS USED FOR CONSTRUCTING CHEMOTAXONOMIC NETWORKS ON METGEM

| Figures | Treat as MS <sup>1</sup> Data | <i>m/z</i> Tolerance | Minimum Matched Peaks | Keep peaks above | Cosine score(s) above | Number of iterations | Learning Rate | Perplexity |
|---------|-------------------------------|----------------------|-----------------------|------------------|-----------------------|----------------------|---------------|------------|
| 2       | Used                          | 2                    | 2                     | 1%               | 0.65                  | 10 000               | 10            | 11         |
| 3       | Used                          | 2                    | 2                     | 1%               | 0.4                   | 10 000               | 10            | 11         |
| 4       | Used                          | 0.1                  | 4                     | 1%               | 0.65                  | 10 000               | 10            | 11         |
| 5       | Used                          | 4                    | 2                     | 1%               | 0.35                  | 10 000               | 10            | 16         |
| 6       | Used                          | 0.1                  | 4                     | 1%               | 0.45                  | 10 000               | 10            | 11         |
